# Supplementary material
Source: publisher figshare collection journal article supplement (https://acs.figshare.com/ndownloader/files/33851460)
Supplement: Supplementary file 1 [file 33851460]

## Sheet: WS01
WS-01: Differential expression of all E. coli K12 genes during exposure to L-Ag NPs at 5 min.
REFID	logFC	AveExpr	t	P.Value	adj.P.Val	B	Gene name	Product
b0484	8.23926	10.1971	108.233	3.38564e-14	1.47072e-10	23.0055	copA	Cu(+) exporting P-type ATPase
b2763	6.49886	6.72533	80.8522	3.66695e-13	5.46128e-10	20.3878	cysI	sulfite reductase%2C hemoprotein subunit
b2764	5.75781	6.71544	80.5741	3.7716e-13	5.46128e-10	20.5416	cysJ	sulfite reductase%2C flavoprotein subunit
b0123	6.75276	8.06364	72.8055	8.63076e-13	6.55057e-10	20.0955	cueO	cuprous oxidase/multicopper oxidase with role in copper homeostasis
b2414	3.66087	8.27378	72.3883	9.04529e-13	6.55057e-10	20.216	cysK	O-acetylserine sulfhydrylase A
b2751	6.46298	6.35991	72.3859	9.04774e-13	6.55057e-10	19.5451	cysN	sulfate adenylyltransferase subunit 1
b2422	6.91253	6.24728	69.7386	1.22641e-12	7.61072e-10	19.129	cysA	sulfate/thiosulfate ABC transporter ATP binding subunit
b1729	4.62662	8.72723	67.9398	1.51801e-12	8.24279e-10	19.7169	tcyP	cystine/sulfocysteine:cation symporter
b2013	3.50344	7.19866	65.1452	2.13874e-12	1.0323e-09	19.3533	yeeE	inner membrane protein YeeE
b2012	3.97246	6.25007	59.8031	4.29908e-12	1.86752e-09	18.5921	yeeD	putative sulfurtransferase YeeD
b0575	5.52852	5.72065	58.9807	4.81325e-12	1.9008e-09	18.1739	cusA	copper/silver export system RND permease
b2423	6.71358	5.44247	55.0382	8.46281e-12	3.06354e-09	17.2986	cysW	sulfate/thiosulfate ABC transporter inner membrane subunit CysW
b0014	2.94217	10.8073	54.1956	9.59744e-12	3.13238e-09	17.8448	dnaK	chaperone protein DnaK
b3917	3.63113	6.53726	53.8607	1.00951e-11	3.13238e-09	17.825	sbp	sulfate/thiosulfate ABC transporter periplasmic binding protein Sbp
b2425	5.81188	5.30282	52.0658	1.33087e-11	3.85421e-09	17.1166	cysP	thiosulfate/sulfate ABC transporter periplasmic binding protein CysP
b2155	2.88802	7.05521	51.6016	1.43167e-11	3.88699e-09	17.4881	cirA	ferric dihyroxybenzoylserine outer membrane transporter
b4143	2.27494	10.3904	51.0814	1.55497e-11	3.9734e-09	17.3376	groL	chaperonin GroEL
b3088	2.5185	8.92821	50.3824	1.7398e-11	3.99929e-09	17.2394	alx	putative membrane-bound redox modulator Alx
b2421	3.27807	7.23029	50.349	1.74923e-11	3.99929e-09	17.2846	cysM	cysteine synthase B
b0019	3.32794	7.9484	49.8178	1.90721e-11	4.14247e-09	17.1798	nhaA	Na(+):H(+) antiporter NhaA
b2424	6.21399	4.78913	47.6725	2.73026e-11	5.63361e-09	16.1642	cysU	sulfate/thiosulfate ABC transporter inner membrane subunit CysU
b2762	6.43519	5.51609	47.4156	2.85312e-11	5.63361e-09	16.4656	cysH	phosphoadenosine phosphosulfate reductase
b2752	7.70688	4.98179	46.4154	3.39443e-11	6.41104e-09	15.6005	cysD	sulfate adenylyltransferase subunit 2
b3172	-2.42374	6.95378	-45.7148	3.84219e-11	6.95437e-09	16.4816	argG	argininosuccinate synthetase
b0150	2.0396	8.81499	44.9766	4.38711e-11	7.62305e-09	16.2589	fhuA	ferrichrome outer membrane transporter/phage receptor
b0161	1.84304	10.7101	44.2931	4.96988e-11	8.30352e-09	16.108	degP	periplasmic serine endoprotease DegP
b0586	2.96724	6.32596	43.9954	5.2505e-11	8.44748e-09	16.1864	entF	apo-serine activating enzyme
b4142	2.44518	7.92898	43.7859	5.45861e-11	8.46865e-09	16.0651	groS	cochaperonin GroES
b0473	2.36665	9.57335	43.2174	6.07168e-11	9.09495e-09	15.8972	htpG	chaperone protein HtpG
b1920	3.90916	6.63799	42.639	6.77569e-11	9.81119e-09	15.9274	tcyJ	cystine ABC transporter periplasmic binding protein
b1275	2.05024	8.15299	41.8136	7.94466e-11	1.11328e-08	15.6496	cysB	DNA-binding transcriptional dual regulator CysB
b2750	6.71394	4.37814	41.051	9.2288e-11	1.25281e-08	14.8078	cysC	adenylyl-sulfate kinase
b4367	2.09496	7.96686	40.5346	1.02306e-10	1.34672e-08	15.3892	fhuF	hydroxamate siderophore iron reductase
b2677	3.08355	5.27486	40.2713	1.07878e-10	1.3783e-08	15.4697	proV	glycine betaine ABC transporter ATP binding subunit ProV
b1816	1.65844	9.08225	39.5991	1.23714e-10	1.51305e-08	15.1343	yoaE	putative inner membrane protein
b0572	9.42447	4.34205	39.5337	1.25391e-10	1.51305e-08	13.2983	cusC	copper/silver export system outer membrane channel
b0020	2.60313	6.9201	39.0118	1.39709e-10	1.64026e-08	15.1356	nhaR	DNA-binding transcriptional activator NhaR
b3687	2.85327	6.73631	38.6999	1.49136e-10	1.70486e-08	15.0848	ibpA	small heat shock protein IbpA
b0674	2.04818	8.2393	38.4018	1.5882e-10	1.76901e-08	14.9046	asnB	asparagine synthetase B
b4062	3.99235	6.69723	38.2458	1.64167e-10	1.78285e-08	15.0143	soxS	DNA-binding transcriptional dual regulator SoxS
b0862	-2.32958	6.08639	-37.8359	1.79206e-10	1.89871e-08	14.9315	artQ	L-arginine ABC transporter membrane subunit ArtQ
b2533	-2.22028	8.26758	-37.486	1.9327e-10	1.99896e-08	14.7037	suhB	inositol-phosphate phosphatase
b2678	2.99245	4.97495	36.7291	2.2814e-10	2.30475e-08	14.7238	proW	glycine betaine ABC transporter membrane subunit ProW
b0776	2.51815	6.54365	36.2928	2.5142e-10	2.4822e-08	14.5426	bioF	8-amino-7-oxononanoate synthase
b0775	2.90162	6.57066	36.1472	2.59774e-10	2.50769e-08	14.5147	bioB	biotin synthase
b0777	2.43225	5.557	36.0316	2.66629e-10	2.5179e-08	14.5471	bioC	malonyl-acyl carrier protein methyltransferase
b0594	3.11698	4.83004	35.9196	2.73459e-10	2.52746e-08	14.5409	entE	2%2C3-dihydroxybenzoate-AMP ligase
b0593	2.68385	5.1212	35.662	2.89938e-10	2.62394e-08	14.482	entC	isochorismate synthase EntC
b4140	3.3071	6.18089	35.3099	3.14289e-10	2.77519e-08	14.3553	fxsA	protein FxsA
b0829	2.09527	6.28959	35.1652	3.24954e-10	2.77519e-08	14.2832	gsiA	glutathione ABC transporter ATP binding subunit GsiA
b0778	2.59716	5.25815	35.1537	3.25817e-10	2.77519e-08	14.358	bioD	dethiobiotin synthetase
b3744	2.83007	9.79376	34.5754	3.72834e-10	3.1146e-08	13.9402	asnA	asparagine synthetase A
b0574	7.62563	4.68847	34.098	4.17423e-10	3.42129e-08	13.6167	cusB	copper/silver export system membrane fusion protein
b0861	-1.98896	6.68066	-33.1801	5.21006e-10	4.19121e-08	13.751	artM	L-arginine ABC transporter membrane subunit ArtM
b2749	2.62659	5.10323	32.1607	6.71227e-10	5.30147e-08	13.625	ygbE	conserved inner membrane protein YgbE
b0863	-2.16951	6.42677	-31.9561	7.06922e-10	5.44976e-08	13.454	artI	putative ABC transporter periplasmic binding protein ArtI
b0439	1.43246	10.0683	31.9109	7.15093e-10	5.44976e-08	13.2195	lon	Lon protease
b4171	1.37114	10.8103	31.7397	7.47005e-10	5.59481e-08	13.1779	miaA	tRNA dimethylallyltransferase
b0002	1.53543	7.88179	31.4703	8.00506e-10	5.89389e-08	13.1649	thrA	fused aspartate kinase/homoserine dehydrogenase 1
b1378	1.60121	7.60829	31.2905	8.386e-10	6.07147e-08	13.1376	ydbK	putative pyruvate-flavodoxin oxidoreductase
b0830	2.24722	5.20011	31.0473	8.93418e-10	6.36231e-08	13.3139	gsiB	glutathione ABC transporter periplasmic binding protein
b0877	-2.65627	5.84694	-30.9073	9.26793e-10	6.41932e-08	13.2374	ybjX	DUF535 domain-containing protein YbjX
b0864	-2.14358	6.17596	-30.8901	9.30979e-10	6.41932e-08	13.185	artP	L-arginine ABC transporter ATP binding subunit
b0464	2.22426	5.55193	30.7749	9.59632e-10	6.5135e-08	13.2078	acrR	DNA-binding transcriptional repressor AcrR
b2675	2.89784	4.29237	30.6249	9.98442e-10	6.67266e-08	13.2505	nrdE	ribonucleoside-diphosphate reductase 2 subunit alpha
b3398	1.44999	7.83311	30.5627	1.01503e-09	6.68075e-08	12.9089	igaA	inner membrane protein - inhibits the Rcs signaling pathway
b0573	7.93148	3.35734	30.4701	1.04032e-09	6.74501e-08	11.9022	cusF	copper/silver export system periplasmic binding protein
b2679	3.16193	4.85655	30.2052	1.11668e-09	7.1336e-08	13.1266	proX	glycine betaine ABC transporter periplasmic binding protein ProX
b0482	1.66443	6.60273	30.0314	1.17018e-09	7.26864e-08	12.8767	ybaP	TraB family protein YbaP
b0747	-1.62777	7.82856	-30.0279	1.17128e-09	7.26864e-08	12.7619	lysY	tRNA-Lys
b1321	3.16367	5.35653	29.8223	1.23838e-09	7.55216e-08	12.9848	ycjX	DUF463 domain-containing protein YcjX
b2592	1.59524	8.44186	29.7829	1.25174e-09	7.55216e-08	12.6432	clpB	ClpB chaperone
b1055	-1.63152	6.52837	-29.6193	1.3089e-09	7.78884e-08	12.7688	yceA	UPF0176 protein YceA
b3958	-2.42802	4.78004	-29.1771	1.47865e-09	8.68005e-08	12.8338	argC	N-acetylglutamylphosphate reductase
b0478	1.29524	8.5664	28.9895	1.558e-09	8.97688e-08	12.3894	ybaL	putative transporter YbaL
b3469	1.3381	8.43125	28.9608	1.57054e-09	8.97688e-08	12.3888	zntA	Zn(2(+))/Cd(2(+))/Pb(2(+)) exporting P-type ATPase
b0585	3.42572	4.63228	28.7277	1.67686e-09	9.38029e-08	12.7266	fes	enterochelin esterase
b3426	-1.51861	7.97902	-28.6794	1.69987e-09	9.38029e-08	12.3417	glpD	aerobic glycerol 3-phosphate dehydrogenase
b3931	1.53764	8.73804	28.6669	1.7059e-09	9.38029e-08	12.2885	hslU	ATPase component of the HslVU protease
b0828	2.09061	5.79419	28.5687	1.75397e-09	9.52407e-08	12.5394	iaaA	isoaspartyl dipeptidase proenzyme
b1102	2.54496	4.34036	28.2463	1.92288e-09	1.03123e-07	12.5864	fhuE	ferric coprogen/ferric rhodotorulic acid outer membrane transporter
b0860	-2.5827	4.7676	-28.1854	1.95684e-09	1.03665e-07	12.549	artJ	L-arginine ABC transporter periplasmic binding protein
b0748	-1.80816	6.66476	-28.1147	1.99705e-09	1.0452e-07	12.3018	lysZ	tRNA-Lys
b0584	2.87065	5.06791	27.9776	2.07769e-09	1.07446e-07	12.461	fepA	ferric enterobactin outer membrane transporter
b0774	1.59731	6.65438	27.9225	2.11114e-09	1.07892e-07	12.2317	bioA	adenosylmethionine-8-amino-7-oxononanoate aminotransferase
b3961	1.33443	7.68974	27.582	2.33165e-09	1.17776e-07	12.0112	oxyR	DNA-binding transcriptional dual regulator OxyR
b0805	1.91235	5.60678	27.3462	2.49951e-09	1.24803e-07	12.1769	fiu	putative iron siderophore outer membrane transporter
b0733	1.1809	9.38729	27.2987	2.53491e-09	1.25035e-07	11.829	cydA	cytochrome bd-I ubiquinol oxidase subunit I
b0673	-1.65292	7.75251	-27.2633	2.56171e-09	1.25035e-07	11.9136	metT	tRNA-Met
b0492	1.64006	7.71405	26.9198	2.8386e-09	1.3701e-07	11.7982	cnoX	chaperedoxin
b0015	2.14477	7.60733	26.8097	2.93434e-09	1.40075e-07	11.7831	dnaJ	chaperone protein DnaJ
b2572	1.09152	9.67388	26.7154	3.01913e-09	1.42555e-07	11.6364	rseA	anti-sigma factor
b2390	1.61454	6.36951	26.518	3.20592e-09	1.49747e-07	11.8106	ypeC	DUF2502 domain-containing protein YpeC
b0571	2.40352	5.26837	26.2661	3.46326e-09	1.57629e-07	11.8837	cusR	DNA-binding transcriptional activator CusR
b1322	2.51369	4.38273	26.2579	3.47202e-09	1.57629e-07	11.9761	ycjF	conserved inner membrane protein YcjF
b0224	-1.37264	7.04654	-26.2472	3.48351e-09	1.57629e-07	11.6441	yafK	L%2CD-transpeptidase domain-containing protein YafK
b0570	1.98474	5.76686	25.6171	4.23986e-09	1.89876e-07	11.592	cusS	sensory histidine kinase CusS
b0815	-1.23211	7.42448	-25.4583	4.45839e-09	1.96945e-07	11.3296	opgE	phosphoethanolamine transferase
b0588	2.12209	4.91657	25.4372	4.48839e-09	1.96945e-07	11.6405	fepC	ferric enterobactin ABC transporter ATP binding subunit
b3686	2.30023	4.43016	25.3804	4.57029e-09	1.98533e-07	11.6803	ibpB	small heat shock protein IbpB
b2181	-1.24804	7.73483	-25.3123	4.6706e-09	2.00882e-07	11.2483	yejG	protein YejG
b4173	1.06687	10.4772	24.6514	5.7838e-09	2.46322e-07	10.9272	hflX	ribosome rescue factor HflX
b1846	1.48373	7.44573	24.556	5.96782e-09	2.51691e-07	11.0069	yebE	conserved inner membrane protein YebE
b1600	1.32833	7.52944	24.4729	6.13356e-09	2.56194e-07	10.9659	mdtJ	multidrug/spermidine efflux pump membrane subunit MdtJ
b3932	1.755	7.14746	24.3532	6.3812e-09	2.62765e-07	10.972	hslV	peptidase component of the HslVU protease
b2614	1.40701	8.42978	24.3386	6.41218e-09	2.62765e-07	10.844	grpE	nucleotide exchange factor GrpE
b0898	-1.65667	6.58769	-24.3058	6.48245e-09	2.62765e-07	11.0263	ycaD	putative transporter YcaD
b0631	1.98983	6.83095	24.2825	6.53284e-09	2.62765e-07	10.9897	ybeD	DUF493 domain-containing protein YbeD
b0003	1.34767	6.48035	24.1851	6.74822e-09	2.68938e-07	10.9817	thrB	homoserine kinase
b0845	1.5831	6.05039	24.0206	7.13062e-09	2.81594e-07	10.9804	ybjJ	inner membrane protein YbjJ
b0743	-1.21774	8.68619	-23.812	7.65057e-09	2.99406e-07	10.6385	lysT	tRNA-Lys
b1743	1.83013	5.88775	23.7589	7.78973e-09	3.0213e-07	10.9132	spy	ATP-independent periplasmic chaperone
b1287	1.59426	5.66804	23.7181	7.89846e-09	3.03636e-07	10.9213	yciW	putative oxidoreductase
b3956	1.09126	9.22056	23.6851	7.98776e-09	3.04376e-07	10.5641	ppc	phosphoenolpyruvate carboxylase
b0124	-1.44326	9.06919	-23.6228	8.15934e-09	3.0821e-07	10.5572	gcd	quinoprotein glucose dehydrogenase
b1968	1.72034	5.36903	23.4996	8.51077e-09	3.1571e-07	10.8849	hprS	sensory histidine kinase HprS
b4077	1.22129	9.17105	23.4902	8.53836e-09	3.1571e-07	10.4933	gltP	glutamate/aspartate : H(+) symporter GltP
b0595	2.833	3.97009	23.4774	8.57593e-09	3.1571e-07	11.0823	entB	enterobactin synthase component B
b0151	1.51743	6.11553	23.4281	8.72259e-09	3.18411e-07	10.7509	fhuC	iron(III) hydroxamate ABC transporter ATP binding subunit
b2671	1.65514	5.90145	23.3047	9.1023e-09	3.28051e-07	10.7369	ygaC	protein YgaC
b3498	1.10702	8.10446	23.2935	9.13769e-09	3.28051e-07	10.4701	prlC	oligopeptidase A
b2395	-1.55351	6.91815	-23.2169	9.38366e-09	3.3412e-07	10.5788	pdeA	putative c-di-GMP phosphodiesterase PdeA
b4537	-1.65362	6.56422	-23.1424	9.6301e-09	3.37865e-07	10.5966	yecJ	DUF2766 domain-containing protein YecJ
b2597	1.44336	10.2499	23.1382	9.6444e-09	3.37865e-07	10.3598	raiA	stationary phase translation inhibitor and ribosome stability factor
b3260	-1.09494	10.2715	-23.0622	9.90364e-09	3.44171e-07	10.3308	dusB	tRNA-dihydrouridine synthase B
b1917	1.61249	5.28196	22.9201	1.04098e-08	3.5889e-07	10.6763	tcyN	cystine ABC transporter ATP binding subunit
b3799	-1.4149	6.5229	-22.6331	1.15225e-08	3.94123e-07	10.3991	proM	tRNA-Pro
b0666	-1.12831	8.72724	-22.5426	1.19008e-08	4.03883e-07	10.146	metU	tRNA-Met
b1110	1.14615	7.01383	22.4455	1.23219e-08	4.11184e-07	10.2541	ycfJ	PF05433 family protein YcfJ
b3653	2.06059	6.20204	22.4364	1.23621e-08	4.11184e-07	10.3751	gltS	glutamate:sodium symporter
b2019	1.43694	6.43901	22.4279	1.23999e-08	4.11184e-07	10.3232	hisG	ATP phosphoribosyltransferase
b4751	1.70794	5.61733	22.3959	1.25436e-08	4.12798e-07	10.43	yoaL	protein YoaL
b3006	1.19739	7.60878	22.3262	1.28625e-08	4.2011e-07	10.1409	exbB	Ton complex subunit ExbB
b0591	1.51195	6.02567	22.1766	1.35782e-08	4.40177e-07	10.28	entS	enterobactin exporter EntS
b4172	1.03597	10.005	22.1342	1.37894e-08	4.43711e-07	9.9626	hfq	RNA-binding protein Hfq
b0596	2.47374	3.82582	22.0983	1.39706e-08	4.46238e-07	10.5798	entA	2%2C3-dihydro-2%2C3-dihydroxybenzoate dehydrogenase
b1609	-1.67132	4.85415	-21.8666	1.52082e-08	4.82222e-07	10.3397	rstB	sensory histidine kinase RstB
b2020	1.2827	6.61035	21.7373	1.59518e-08	5.02136e-07	10.0224	hisD	histidinal/histidinol dehydrogenase
b2497	-1.53186	5.82113	-21.588	1.6862e-08	5.26966e-07	10.0819	uraA	hypothetical protein
b1558	-1.25764	6.93223	-21.5309	1.7225e-08	5.34468e-07	9.90306	cspF	Qin prophage%3B cold shock protein CspF
b0660	1.44952	7.84604	21.4942	1.74636e-08	5.38029e-07	9.78347	ybeZ	PhoH-like protein
b4750	-1.37016	6.73708	-21.3897	1.81622e-08	5.5561e-07	9.872	ynfS	Qin prophage%3B protein YnfS
b1109	1.17392	8.76444	21.2012	1.95024e-08	5.84295e-07	9.59141	ndh	NADH:quinone oxidoreductase II
b3924	1.24835	6.68354	21.1989	1.95193e-08	5.84295e-07	9.79071	fpr	flavodoxin/ferredoxin-NADP(+) reductase
b0709	-1.91669	4.42284	-21.1865	1.96116e-08	5.84295e-07	10.1405	dtpD	dipeptide:H(+) symporter DtpD
b0412	1.46001	5.22438	21.183	1.96379e-08	5.84295e-07	9.99306	yajI	putative lipoprotein YajI
b4174	0.918615	10.8415	21.1077	2.0208e-08	5.95809e-07	9.54709	hflK	regulator of FtsH protease
b2518	-0.998372	7.683	-21.0959	2.02992e-08	5.95809e-07	9.63083	ndk	nucleoside diphosphate kinase
b1608	-1.89403	4.38629	-21.0648	2.05416e-08	5.98879e-07	10.0954	rstA	DNA-binding transcriptional regulator RstA
b0463	1.03717	8.72306	21.0297	2.08188e-08	6.02912e-07	9.51755	acrA	multidrug efflux pump membrane fusion lipoprotein AcrA
b3570	0.994219	7.69988	20.9979	2.10735e-08	6.03626e-07	9.58451	bax	putative glycoside hydrolase Bax
b3911	0.857452	9.24894	20.9869	2.11626e-08	6.03626e-07	9.48319	cpxA	sensory histidine kinase CpxA
b3005	1.29035	6.97091	20.9749	2.12603e-08	6.03626e-07	9.66146	exbD	Ton complex subunit ExbD
b3055	0.952177	7.89895	20.9352	2.15863e-08	6.08903e-07	9.53748	ygiM	putative signal transduction protein (SH3 domain)
b3238	-1.16032	7.12951	-20.901	2.18722e-08	6.1143e-07	9.61349	yhcN	DUF1471 domain-containing stress-induced protein YhcN
b2210	-1.79203	7.30218	-20.8796	2.20533e-08	6.1143e-07	9.59782	mqo	malate:quinone oxidoreductase
b2021	1.24795	6.27362	20.8743	2.20982e-08	6.1143e-07	9.70729	hisC	histidinol-phosphate aminotransferase
b2534	-1.91364	4.58379	-20.8377	2.24118e-08	6.13636e-07	9.97408	yfhR	putative peptidase
b4148	1.21156	6.98099	20.822	2.25481e-08	6.13636e-07	9.5941	gdx	guanidinium exporter
b1722	-1.1506	6.42935	-20.8159	2.26017e-08	6.13636e-07	9.66605	ydiY	acid-inducible putative outer membrane protein YdiY
b2573	0.886941	8.88883	20.768	2.30242e-08	6.21225e-07	9.39632	rpoE	RNA polymerase sigma E factor
b0844	1.30945	5.68077	20.6895	2.37354e-08	6.35016e-07	9.71502	ybjI	5-amino-6-(5-phospho-D-ribitylamino)uracil phosphatase
b1599	1.19349	6.93158	20.6672	2.39425e-08	6.35016e-07	9.53378	mdtI	multidrug/spermidine efflux pump membrane subunit MdtI
b1641	-1.00927	7.27035	-20.6638	2.39739e-08	6.35016e-07	9.49272	slyB	outer membrane lipoprotein SlyB
b4175	0.86608	10.3302	20.6328	2.42653e-08	6.38838e-07	9.34041	hflC	regulator of FtsH protease
b2426	1.0879	7.79638	20.6165	2.44195e-08	6.39027e-07	9.41273	ucpA	putative oxidoreductase
b3401	1.08969	7.90175	20.3671	2.69278e-08	7.00445e-07	9.29418	hslO	molecular chaperone Hsp33
b0672	-1.35239	9.08887	-20.266	2.80263e-08	7.24681e-07	9.18896	leuW	tRNA-Leu
b3400	1.30439	6.85162	20.2295	2.84356e-08	7.30912e-07	9.35641	hslR	heat shock protein Hsp15
b1230	-1.07574	6.83698	-20.1413	2.94507e-08	7.52202e-07	9.32075	tyrV	tRNA-Tyr
b3066	-0.978039	9.23625	-20.1277	2.96102e-08	7.52202e-07	9.11607	dnaG	DNA primase
b1969	1.88267	4.48706	20.0188	3.09289e-08	7.8055e-07	9.62981	hprR	DNA-binding transcriptional dual regulator HprR
b0734	1.09489	8.95838	20.0062	3.10854e-08	7.8055e-07	9.06595	cydB	cytochrome bd-I ubiquinol oxidase subunit II
b0004	1.17882	6.91236	19.9487	3.18123e-08	7.90061e-07	9.22268	thrC	threonine synthase
b4487	1.72398	5.40816	19.9341	3.19998e-08	7.90061e-07	9.44202	yjdP	protein YjdP
b1304	2.30369	4.72751	19.9333	3.20098e-08	7.90061e-07	9.57288	pspA	phage shock protein A
b3527	0.944702	7.64755	19.8468	3.31474e-08	8.13516e-07	9.08889	yhjJ	peptidase M16 family protein
b2209	1.04745	7.38155	19.6883	3.53494e-08	8.62683e-07	9.04808	eco	serine protease inhibitor ecotin
b1907	-1.81496	4.93242	-19.5942	3.67351e-08	8.91493e-07	9.38167	tyrP	tyrosine:H(+) symporter
b4359	-1.09078	6.34398	-19.521	3.78549e-08	9.10182e-07	9.10917	opgB	phosphoglycerol transferase I
b1987	2.44299	3.31758	19.5165	3.79243e-08	9.10182e-07	9.59119	cbl	DNA-binding transcriptional activator Cbl
b3070	2.16635	4.53657	19.4661	3.87201e-08	9.24177e-07	9.39219	nfeF	NADPH-dependent ferric chelate reductase
b2922	1.00233	7.46404	19.4196	3.94691e-08	9.30062e-07	8.91648	yggE	uncharacterized protein YggE
b3798	-1.48971	7.64017	-19.4183	3.94905e-08	9.30062e-07	8.90835	leuT	tRNA-Leu
b4383	0.81128	10.005	19.411	3.9609e-08	9.30062e-07	8.79398	deoB	phosphopentomutase
b3796	-1.4852	7.232	-19.2957	4.15476e-08	9.70338e-07	8.89942	argX	tRNA-Arg
b3546	1.17672	8.12661	19.2605	4.216e-08	9.79374e-07	8.77877	eptB	Kdo2-lipid A phosphoethanolamine 7''-transferase
b0606	-0.835566	10.6675	-19.2276	4.27413e-08	9.87596e-07	8.71553	ahpF	alkyl hydroperoxide reductase%2C AhpF component
b0945	-1.14219	6.0912	-19.0494	4.60542e-08	1.05851e-06	8.9302	pyrD	dihydroorotate dehydrogenase%2C type 2
b1829	0.828693	10.0094	18.9854	4.73116e-08	1.08169e-06	8.59688	htpX	zinc dependent endoprotease
b0925	1.03014	6.62781	18.9382	4.82651e-08	1.09771e-06	8.797	ldtD	L%2CD-transpeptidase LdtD
b0597	2.20288	3.32569	18.8807	4.94545e-08	1.11891e-06	9.30674	entH	proofreading thioesterase in enterobactin biosynthesis
b1919	1.30052	5.95583	18.8466	5.01774e-08	1.12923e-06	8.85294	dcyD	D-cysteine desulfhydrase
b4392	0.963475	6.91503	18.8347	5.04308e-08	1.12923e-06	8.71039	slt	soluble lytic murein transglycosylase
b4155	-1.19109	6.06784	-18.8202	5.07422e-08	1.13038e-06	8.82837	epmA	EF-P-lysine lysyltransferase
b4138	0.820917	8.03461	18.757	5.21293e-08	1.15536e-06	8.54673	dcuA	C4-dicarboxylate transporter DcuA
b1113	0.96166	8.11421	18.7209	5.29395e-08	1.16736e-06	8.52389	ldtC	L%2CD-transpeptidase YcfS
b1452	0.952856	7.19861	18.6421	5.4758e-08	1.20136e-06	8.58461	yncE	PQQ-like domain-containing protein YncE
b2741	0.821195	8.17805	18.6231	5.52072e-08	1.20513e-06	8.46959	rpoS	RNA polymerase%2C sigma S (sigma 38) factor
b0427	-1.21528	6.10231	-18.5833	5.61603e-08	1.2198e-06	8.71236	yajR	putative major facilitator superfamily transport protein YajR
b0665	-1.31655	7.97929	-18.5588	5.67568e-08	1.22662e-06	8.47081	glnV	tRNA-Gln
b0849	-1.027	7.00296	-18.4207	6.02511e-08	1.29228e-06	8.50843	grxA	reduced glutaredoxin 1
b3797	-1.565	7.63977	-18.4155	6.03896e-08	1.29228e-06	8.44006	hisR	tRNA-His
b4163	-1.53774	6.5073	-18.3832	6.12421e-08	1.3041e-06	8.56849	glyV	tRNA-Gly
b0659	0.984884	6.72258	18.3177	6.30174e-08	1.33535e-06	8.48943	ybeY	endoribonuclease YbeY
b3960	-1.10054	5.90586	-18.055	7.07344e-08	1.4916e-06	8.48522	argH	argininosuccinate lyase
b2014	-1.21171	9.18281	-18.0257	7.16596e-08	1.49953e-06	8.14131	plaP	putrescine:H(+) symporter PlaP
b2517	-0.806455	8.8801	-18.0212	7.18007e-08	1.49953e-06	8.13964	rlmN	23S rRNA m(2)A2503 methyltransferase/tRNA m(2)A37 methyltransferase
b3279	1.11289	5.79139	17.961	7.37493e-08	1.53286e-06	8.45098	yrdA	protein YrdA
b0749	-2.47282	4.43826	-17.9278	7.48468e-08	1.54826e-06	8.73042	lysQ	tRNA-Lys
b0746	-1.6006	7.65981	-17.8649	7.69786e-08	1.58481e-06	8.17013	valZ	tRNA-Val
b1216	0.756032	9.01359	17.7608	8.0659e-08	1.65275e-06	8.00042	chaA	Na(+)/K(+):H(+) antiporter ChaA
b2927	0.735842	8.75407	17.7388	8.1462e-08	1.6564e-06	7.99696	epd	D-erythrose-4-phosphate dehydrogenase
b0059	-0.806739	8.79248	-17.735	8.15997e-08	1.6564e-06	8.00116	rapA	RNA polymerase-binding ATPase and RNAP recycling factor
b2081	-1.05305	6.97517	-17.6932	8.3154e-08	1.6801e-06	8.15645	yegQ	putative peptidase YegQ
b3359	-1.90467	5.22085	-17.6048	8.65482e-08	1.73306e-06	8.404	argD	N-acetylornithine aminotransferase/N-succinyldiaminopimelate aminotransferase
b4217	1.27416	7.13501	17.6041	8.65734e-08	1.73306e-06	8.09007	ytfK	DUF1107 domain-containing protein YtfK
b2587	-0.745954	10.3098	-17.5892	8.71629e-08	1.73686e-06	7.92156	kgtP	alpha-ketoglutarate:H(+) symporter
b2530	0.870857	10.7004	17.573	8.78052e-08	1.74167e-06	7.91695	iscS	cysteine desulfurase
b0379	1.23552	5.11319	17.5471	8.8846e-08	1.7543e-06	8.35925	yaiY	inner membrane protein
b1843	1.04549	5.96184	17.4062	9.4753e-08	1.86247e-06	8.14748	yobB	putative carbon-nitrogen hydrolase family protein YobB
b3261	-1.0641	8.77605	-17.3336	9.7969e-08	1.91574e-06	7.80577	fis	DNA-binding transcriptional dual regulator Fis
b3179	1.03629	10.3257	17.3252	9.83449e-08	1.91574e-06	7.78765	rlmE	23S rRNA 2'-O-ribose U2552 methyltransferase
b0220	1.10956	6.37577	17.2861	1.00134e-07	1.94188e-06	8.02734	ivy	periplasmic chaperone%2C inhibitor of vertebrate C-type lysozyme
b0835	-0.896315	7.05731	-17.2557	1.01553e-07	1.96065e-06	7.92177	rimO	ribosomal protein S12 methylthiotransferase RimO
b0495	1.1715	5.56284	17.1815	1.05106e-07	2.02027e-06	8.09974	ybbA	putative ABC transporter ATP-binding protein YbbA
b1172	1.09003	5.6101	17.1603	1.06145e-07	2.03125e-06	8.07925	ymgG	PF13488 family protein YmgG
b4242	-1.28458	5.6591	-17.1261	1.07847e-07	2.05429e-06	8.06653	mgtA	Mg(2(+)) importing P-type ATPase
b3959	-1.48796	4.59304	-17.1172	1.08295e-07	2.05429e-06	8.25163	argB	acetylglutamate kinase
b2674	3.21077	2.3888	17.0874	1.0981e-07	2.07398e-06	8.56589	nrdI	dimanganese-tyrosyl radical cofactor maintenance flavodoxin NrdI
b2814	-0.866335	7.49173	-17.0744	1.10476e-07	2.07523e-06	7.77526	metZ	tRNA-Met
b3347	0.766172	9.9622	17.0676	1.10832e-07	2.07523e-06	7.6514	fkpA	peptidyl-prolyl cis-trans isomerase FkpA
b0437	1.04799	9.26638	16.9373	1.17813e-07	2.19647e-06	7.58025	clpP	ATP-dependent Clp protease proteolytic subunit
b1683	1.4533	4.41133	16.9189	1.18837e-07	2.20609e-06	8.17116	sufB	Fe-S cluster scaffold complex subunit SufB
b1606	-1.34156	5.31349	-16.8653	1.2188e-07	2.24611e-06	7.99135	folM	dihydromonapterin reductase
b1586	1.39304	4.71596	16.8628	1.22026e-07	2.24611e-06	8.08516	ynfD	DUF1161 domain-containing protein YnfD
b3151	-1.89603	6.51699	-16.801	1.25651e-07	2.30308e-06	7.7856	yraQ	permease family protein YraQ
b4663	-1.90166	3.89007	-16.773	1.2733e-07	2.32403e-06	8.22202	azuC	uncharacterized protein AzuC
b1520	-1.36469	5.04002	-16.7474	1.28885e-07	2.34259e-06	7.97773	yneE	conserved inner membrane protein YneE
b2531	0.713797	9.08977	16.6419	1.35544e-07	2.45335e-06	7.42221	iscR	DNA-binding transcriptional dual regulator IscR
b2692	-1.03418	7.31183	-16.6303	1.36299e-07	2.45677e-06	7.56595	argZ	tRNA-Arg
b3184	-0.728497	9.1826	-16.61	1.37627e-07	2.46112e-06	7.40769	yhbE	inner membrane protein YhbE
b0152	1.66185	5.23265	16.6093	1.37673e-07	2.46112e-06	7.87302	fhuD	iron(III) hydroxamate ABC transporter periplasmic binding protein
b0668	-1.16448	9.56364	-16.5843	1.39336e-07	2.47657e-06	7.39511	glnW	tRNA-Gln
b0462	0.749758	10.4322	16.5789	1.39698e-07	2.47657e-06	7.39912	acrB	multidrug efflux pump RND permease AcrB
b1306	2.00029	3.34579	16.5707	1.40248e-07	2.47657e-06	8.19893	pspC	phage shock protein C
b0217	-1.24791	4.90347	-16.5407	1.42285e-07	2.50237e-06	7.88873	yafT	lipoprotein YafT
b2240	-1.58865	4.1891	-16.53	1.43026e-07	2.50282e-06	8.029	glpT	sn-glycerol 3-phosphate:phosphate antiporter
b0438	0.682798	10.1557	16.5236	1.43463e-07	2.50282e-06	7.36699	clpX	ATP-dependent Clp protease ATP-binding subunit ClpX
b0811	0.901955	8.09118	16.5071	1.44609e-07	2.51273e-06	7.41052	glnH	L-glutamine ABC transporter periplasmic binding protein
b0745	-1.38014	8.95694	-16.4962	1.45372e-07	2.51592e-06	7.3686	lysW	tRNA-Lys
b4165	-1.74638	6.31202	-16.4761	1.46787e-07	2.52917e-06	7.63927	glyY	tRNA-Gly
b2498	-0.886909	6.94501	-16.4682	1.47349e-07	2.52917e-06	7.52419	upp	uracil phosphoribosyltransferase
b2022	1.13985	6.0768	16.4596	1.47965e-07	2.52917e-06	7.64023	hisB	imidazoleglycerol-phosphate dehydratase/histidinol-phosphatase
b0589	1.68688	5.05815	16.4526	1.48466e-07	2.52917e-06	7.82123	fepG	ferric enterobactin ABC transporter membrane subunit FepG
b0735	1.02853	6.27401	16.4381	1.4951e-07	2.537e-06	7.59764	ybgE	cyd operon protein YbgE
b0907	0.685891	8.52923	16.4245	1.50498e-07	2.54383e-06	7.32665	serC	phosphoserine/phosphohydroxythreonine aminotransferase
b4018	0.788938	7.27747	16.4104	1.51534e-07	2.5456e-06	7.44678	iclR	DNA-binding transcriptional repressor IclR
b2566	-0.793889	8.69819	-16.4071	1.51775e-07	2.5456e-06	7.31598	era	30S ribosomal subunit maturation GTPase Era
b1634	-0.722701	9.49801	-16.3916	1.52924e-07	2.555e-06	7.28905	dtpA	dipeptide/tripeptide:H(+) symporter DtpA
b2562	-1.5117	4.07286	-16.2646	1.62682e-07	2.69883e-06	7.9074	yfhL	putative 4Fe-4S cluster-containing protein YfhL
b2567	-0.801435	7.9326	-16.2635	1.62775e-07	2.69883e-06	7.2973	rnc	RNase III
b3655	0.956008	6.10437	16.2508	1.63788e-07	2.7053e-06	7.52087	yicH	AsmA famly protein YicH
b4469	-0.834971	8.5906	-16.1911	1.68651e-07	2.77507e-06	7.2057	ygiQ	radical SAM superfamily protein YgiQ
b1060	0.928849	8.50754	16.1189	1.7475e-07	2.86457e-06	7.16648	bssS	regulator of biofilm formation
b3784	-0.769958	8.4815	-16.1109	1.75441e-07	2.8651e-06	7.16687	rfe	UDP-N-acetylglucosamine--undecaprenyl-phosphate N-acetylglucosaminephosphotransferase
b2528	0.674354	9.08711	16.0393	1.81763e-07	2.95722e-06	7.09573	iscA	iron-sulfur cluster insertion protein IscA
b0477	-0.905646	6.51404	-16.0115	1.84292e-07	2.98717e-06	7.33559	gsk	inosine/guanosine kinase
b0847	-0.83938	6.7844	-15.9619	1.88894e-07	3.04405e-06	7.26978	ybjL	putative transport protein YbjL
b4164	-1.63723	6.9624	-15.9586	1.89202e-07	3.04405e-06	7.26231	glyX	tRNA-Gly
b0048	-0.976365	6.08882	-15.9322	1.91709e-07	3.073e-06	7.35511	folA	dihydrofolate reductase
b0854	-2.36172	2.92109	-15.9174	1.93128e-07	3.08437e-06	7.9511	potF	putrescine ABC transporter periplasmic binding protein
b1063	0.815577	6.86766	15.8625	1.98498e-07	3.15852e-06	7.19876	yceB	putative lipid-binding lipoprotein YceB
b3472	0.817215	7.8511	15.8492	1.9983e-07	3.16811e-06	7.07497	dcrB	periplasmic bacteriophage sensitivity protein DcrB
b4292	1.05424	5.72584	15.761	2.08884e-07	3.29961e-06	7.31396	fecR	regulator for fec operon%2C periplasmic
b1114	0.920582	7.80732	15.6701	2.18697e-07	3.4421e-06	6.98043	mfd	transcription-repair coupling factor
b0162	0.979667	6.83942	15.6523	2.20683e-07	3.45883e-06	7.0875	cdaR	DNA-binding transcriptional activator CdaR
b2218	0.686995	8.41263	15.6463	2.21352e-07	3.45883e-06	6.90634	rcsC	sensory histidine kinase RcsC
b0238	-0.873891	6.63264	-15.6034	2.26233e-07	3.52243e-06	7.09157	gpt	xanthine-guanine phsophoribosyltransferase
b0458	0.776562	7.83691	15.584	2.28474e-07	3.54461e-06	6.9275	ylaC	putative inner membrane protein
b0670	-1.1562	9.15087	-15.5673	2.30421e-07	3.55475e-06	6.84365	glnU	tRNA-Gln
b1740	0.865826	6.73497	15.5585	2.31462e-07	3.55475e-06	7.04702	nadE	NAD synthetase%2C NH3-dependent
b3440	0.939047	6.36744	15.5575	2.31583e-07	3.55475e-06	7.09896	yhhX	putative oxidoreductase YhhX
b2023	1.24906	5.09137	15.5506	2.32401e-07	3.55475e-06	7.30903	hisH	imidazole glycerol phosphate synthase subunit HisH
b1163	-1.15903	7.66986	-15.5413	2.33506e-07	3.55912e-06	6.92939	bluF	blue light-responsive regulator of BluR
b0842	-0.874561	6.36719	-15.5258	2.35358e-07	3.57482e-06	7.08517	mdfA	multidrug efflux pump MdfA/Na(+):H(+) antiporter/K(+):H(+) antiporter
b1761	0.688536	7.92747	15.5009	2.3837e-07	3.60794e-06	6.86999	gdhA	glutamate dehydrogenase
b2494	0.938529	6.76567	15.4717	2.41972e-07	3.64974e-06	6.99476	bepA	beta-barrel assembly-enhancing protease
b3180	-0.779454	7.57076	-15.4121	2.49488e-07	3.73191e-06	6.86179	yhbY	ribosome assembly factor YhbY
b3178	0.660655	12.0936	15.4116	2.49555e-07	3.73191e-06	6.76841	ftsH	ATP-dependent zinc metalloprotease FtsH
b1687	0.752578	7.33257	15.4081	2.49996e-07	3.73191e-06	6.8849	ydiJ	putative FAD-linked oxidoreductase
b0767	0.834723	7.06487	15.3874	2.52682e-07	3.75907e-06	6.90627	pgl	6-phosphogluconolactonase
b2936	0.79856	6.80854	15.3537	2.57106e-07	3.81183e-06	6.91982	loiP	metalloprotease LoiP
b0966	0.897254	6.8134	15.343	2.58532e-07	3.81941e-06	6.91446	hspQ	heat shock protein%2C hemimethylated DNA-binding protein
b0664	-1.0267	8.41428	-15.3367	2.59375e-07	3.81941e-06	6.7439	glnX	tRNA-Gln
b4111	-0.817939	9.1352	-15.2833	2.66651e-07	3.91328e-06	6.67501	proP	osmolyte:H(+) symporter ProP
b1916	0.777231	6.86374	15.2633	2.69435e-07	3.94083e-06	6.86027	sdiA	DNA-binding transcriptional dual regulator SdiA
b3729	0.677237	8.47476	15.2504	2.71241e-07	3.95393e-06	6.67556	glmS	L-glutamine--D-fructose-6-phosphate aminotransferase
b3771	0.93444	5.93624	15.2414	2.72522e-07	3.95931e-06	6.98429	ilvD	dihydroxy-acid dehydratase
b2676	2.35191	2.85847	15.1791	2.81505e-07	4.07619e-06	7.55242	nrdF	ribonucleoside-diphosphate reductase 2 subunit beta
b2170	-1.35757	4.1609	-15.1388	2.87493e-07	4.14907e-06	7.26587	setB	sugar exporter SetB
b3262	-1.94662	3.51445	-15.1274	2.89221e-07	4.16019e-06	7.41076	yhdJ	DNA adenine methyltransferase
b4019	0.780213	7.12333	15.1033	2.9289e-07	4.18845e-06	6.73473	metH	cobalamin-dependent methionine synthase
b0207	-1.3797	4.23263	-15.0989	2.93577e-07	4.18845e-06	7.2302	dkgB	methylglyoxal reductase DkgB
b0831	1.95919	4.1107	15.0955	2.94088e-07	4.18845e-06	7.26688	gsiC	glutathione ABC transporter membrane subunit GsiC
b4260	0.642729	8.95265	15.0894	2.95043e-07	4.18845e-06	6.55897	pepA	aminopeptidase A/I
b0016	2.11934	3.44786	15.0691	2.98199e-07	4.21947e-06	7.38428	insL-1	IS186/IS421 transposase
b1245	-0.813256	6.79312	-15.0139	3.06998e-07	4.32987e-06	6.73024	oppC	murein tripeptide ABC transporter/oligopeptide ABC transporter inner membrane subunit OppC
b4384	0.704732	9.39096	14.9904	3.10829e-07	4.36971e-06	6.49892	deoD	purine nucleoside phosphorylase
b0744	-1.21273	9.21841	-14.9428	3.18748e-07	4.46658e-06	6.48204	valT	tRNA-Val
b2024	1.0166	5.36466	14.9246	3.21832e-07	4.4953e-06	6.89795	hisA	1-(5-phosphoribosyl)-5-[(5-phosphoribosylamino)methylideneamino]imidazole-4-carboxamide isomerase
b0804	2.50933	2.42792	14.8679	3.31672e-07	4.61789e-06	7.43968	ybiX	PKHD-type hydroxylase YbiX
b0166	0.629976	8.52108	14.8616	3.32795e-07	4.61872e-06	6.4444	dapD	tetrahydrodipicolinate succinylase
b1739	1.23091	4.46462	14.8275	3.38895e-07	4.68841e-06	7.01067	osmE	osmotically-inducible lipoprotein OsmE
b3495	0.78431	8.09401	14.8099	3.42094e-07	4.71764e-06	6.45241	uspA	universal stress global stress response regulator
b0773	1.01303	5.23682	14.7137	3.60186e-07	4.95142e-06	6.79597	ybhB	putative kinase inhibitor
b2174	-0.947883	5.88349	-14.627	3.77422e-07	5.172e-06	6.63892	lpxT	Kdo2-lipid A phosphotransferase
b0810	0.736642	7.05321	14.5825	3.86614e-07	5.28129e-06	6.43511	glnP	L-glutamine ABC transporter membrane subunit
b4370	-1.20224	4.57427	-14.5273	3.98366e-07	5.41217e-06	6.82149	leuQ	tRNA-Leu
b2943	0.654704	8.21355	14.5259	3.98686e-07	5.41217e-06	6.26929	galP	galactose:H(+) symporter
b4368	-1.15349	5.45454	-14.5103	4.02081e-07	5.44125e-06	6.64832	leuV	tRNA-Leu
b0469	-0.655568	8.06253	-14.4643	4.12298e-07	5.56219e-06	6.25039	apt	adenine phosphoribosyltransferase
b2571	0.670457	9.04226	14.416	4.23315e-07	5.68653e-06	6.1563	rseB	anti-sigma factor stabilizing protein RseB
b3008	1.00485	5.48871	14.4125	4.24134e-07	5.68653e-06	6.57186	metC	cystathionine beta-lyase/L-cysteine desulfhydrase
b0809	0.70522	7.56224	14.4033	4.26279e-07	5.69771e-06	6.26541	glnQ	L-glutamine ABC transporter ATP binding subunit
b3969	-0.825021	6.60846	-14.3628	4.35875e-07	5.80811e-06	6.36769	gltT	tRNA-Glu
b2432	0.928656	6.83043	14.347	4.39665e-07	5.83283e-06	6.32417	yfeY	DUF1131 domain-containing lipoprotein YfeY
b2340	0.747234	7.05812	14.3439	4.40416e-07	5.83283e-06	6.29006	sixA	phosphohistidine phosphatase
b3743	1.29752	4.41189	14.3315	4.4343e-07	5.85489e-06	6.72929	asnC	DNA-binding transcriptional dual regulator AsnC
b2581	-0.613343	9.03497	-14.3158	4.47292e-07	5.88799e-06	6.09842	yfiF	putative methyltransferase
b1436	1.44331	3.72444	14.3076	4.49306e-07	5.89664e-06	6.85733	yncJ	protein YncJ
b1814	0.600966	9.33331	14.3011	4.50925e-07	5.90006e-06	6.0844	sdaA	L-serine deaminase I
b1605	-1.92654	5.91067	-14.2712	4.58448e-07	5.98048e-06	6.45422	ydgI	putative arginine:ornithine antiporter
b3256	-0.600423	10.4721	-14.258	4.6179e-07	6.00498e-06	6.07041	accC	biotin carboxylase
b3357	0.661705	9.33187	14.2472	4.64562e-07	6.00498e-06	6.0516	crp	DNA-binding transcriptional dual regulator CRP
b4511	3.89338	1.6313	14.2443	4.65319e-07	6.00498e-06	7.10896	ybdZ	enterobactin biosynthesis protein YbdZ
b1791	-1.10076	4.68441	-14.2422	4.65856e-07	6.00498e-06	6.62458	nimT	2-nitroimidazole exporter
b4515	1.0768	5.77441	14.1966	4.77804e-07	6.14077e-06	6.39297	cydX	cytochrome bd-I ubiquinol oxidase subunit CydX
b3740	-0.810179	6.37486	-14.1882	4.80015e-07	6.15099e-06	6.29414	rsmG	16S rRNA m(7)G527 methyltransferase
b3600	0.886	7.33067	14.1809	4.81979e-07	6.1527e-06	6.15773	mtlD	mannitol-1-phosphate 5-dehydrogenase
b4271	-0.781068	7.12115	-14.1772	4.82981e-07	6.1527e-06	6.18355	intB	KpLE2 phage-like element%3B putative integrase
b0677	-0.673396	7.34472	-14.1363	4.94116e-07	6.27614e-06	6.129	nagA	N-acetylglucosamine-6-phosphate deacetylase
b3284	0.749571	7.26933	14.0938	5.05985e-07	6.40816e-06	6.11007	smg	DUF494 domain-containing protein Smg
b4470	-1.64999	5.24983	-14.0838	5.08806e-07	6.42515e-06	6.44363	cyuA	putative L-cysteine desulfidase CyuA
b2903	0.796282	6.39955	14.0509	5.18271e-07	6.52571e-06	6.20057	gcvP	glycine decarboxylase
b3942	-0.777321	8.93387	-14.0136	5.29261e-07	6.61593e-06	5.91738	katG	hydroperoxidase I
b4060	-0.719102	7.27342	-14.0132	5.29384e-07	6.61593e-06	6.06173	yjcB	uncharacterized protein YjcB
b3770	0.984152	5.6659	14.0111	5.30005e-07	6.61593e-06	6.29496	ilvE	branched-chain-amino-acid aminotransferase
b2529	0.870976	9.12054	13.9966	5.34341e-07	6.65093e-06	5.89884	iscU	scaffold protein for iron-sulfur cluster assembly
b4293	0.90683	5.67188	13.9413	5.51264e-07	6.82332e-06	6.24896	fecI	RNA polymerase sigma factor FecI
b3671	1.4036	4.83726	13.9411	5.51332e-07	6.82332e-06	6.41111	ilvB	acetohydroxy acid synthase I subunit IlvB
b3912	0.788634	8.58373	13.9247	5.56464e-07	6.85573e-06	5.87141	cpxR	DNA-binding transcriptional dual regulator CpxR
b0592	1.26744	4.39255	13.9227	5.57107e-07	6.85573e-06	6.48231	fepB	ferric enterobactin ABC transporter periplasmic binding protein
b3800	-1.20986	5.14576	-13.9065	5.6224e-07	6.89935e-06	6.3354	aslB	putative anaerobic sulfatase maturation enzyme AslB
b0855	-2.39333	2.22553	-13.8778	5.71437e-07	6.99246e-06	6.90459	potG	putrescine ABC transporter ATP binding subunit
b1305	2.29898	2.70004	13.8223	5.89775e-07	7.18826e-06	6.79578	pspB	phage shock protein B
b0712	1.04004	6.07595	13.8194	5.90748e-07	7.18826e-06	6.10856	pxpC	5-oxoprolinase component C
b2834	0.630565	7.65379	13.7943	5.99275e-07	7.25283e-06	5.87626	tas	putative NADP(H)-dependent aldo-keto reductase Tas
b4218	-0.86123	6.46429	-13.7939	5.99394e-07	7.25283e-06	6.03607	ytfL	putative inner membrane protein
b3170	-0.625866	9.07807	-13.7	6.32484e-07	7.63198e-06	5.71241	rimP	ribosome maturation factor RimP
b0736	-0.677975	7.41022	-13.6866	6.37387e-07	7.66983e-06	5.83854	ybgC	esterase/thioesterase
b3803	0.683802	7.51229	13.6717	6.42866e-07	7.70955e-06	5.81498	hemX	PF04375 family protein HemX
b2590	-0.904464	5.63265	-13.668	6.44237e-07	7.70955e-06	6.0898	gltW	tRNA-Glu
b1307	2.30819	2.41442	13.6421	6.53933e-07	7.80408e-06	6.72991	pspD	phage shock protein D
b1779	0.705157	12.2422	13.6313	6.58006e-07	7.83117e-06	5.69266	gapA	glyceraldehyde-3-phosphate dehydrogenase A
b0689	-1.10581	4.97422	-13.6181	6.63055e-07	7.86205e-06	6.1819	ybfP	lipoprotein YbfP
b0022	-1.45163	3.51078	-13.615	6.6422e-07	7.86205e-06	6.48938	insA-1	IS1 protein InsA
b4170	0.661536	8.78823	13.5846	6.76025e-07	7.98004e-06	5.64236	mutL	DNA mismatch repair protein MutL
b3662	-0.767855	6.92273	-13.5557	6.87431e-07	8.09268e-06	5.81796	nepI	purine ribonucleoside exporter
b2673	3.59611	1.17424	13.5481	6.90469e-07	8.10648e-06	6.70095	nrdH	glutaredoxin-like protein
b0710	1.127	5.59753	13.543	6.92525e-07	8.10871e-06	6.01465	ybgI	radiation resistance protein YbgI
b0058	-0.897795	7.05959	-13.4624	7.25771e-07	8.47513e-06	5.7416	rluA	23S rRNA pseudouridine(746) and tRNA pseudouridine(32) synthase
b1231	-0.806107	6.23637	-13.4522	7.30092e-07	8.48365e-06	5.85025	tyrT	tRNA-Tyr
b2691	-0.947363	6.56381	-13.4515	7.30406e-07	8.48365e-06	5.80445	argQ	tRNA-Arg
b3536	-0.772326	7.0998	-13.4189	7.4448e-07	8.62406e-06	5.70601	bcsE	c-di-GMP-binding protein BcsE
b1422	-0.972347	5.72789	-13.3934	7.55654e-07	8.73021e-06	5.89868	ydcI	putative DNA-binding transcriptional repressor YdcI
b3161	-0.8435	5.6921	-13.3709	7.65721e-07	8.82305e-06	5.88709	mtr	tryptophan:H(+) symporter Mtr
b1252	0.899231	5.99612	13.3163	7.90708e-07	9.06814e-06	5.79627	tonB	Ton complex subunit TonB
b1780	0.950425	5.14818	13.3153	7.91166e-07	9.06814e-06	5.94324	yeaD	putative aldose 1-epimerase YeaD
b3974	-0.710605	6.97658	-13.2989	7.98848e-07	9.1321e-06	5.6431	coaA	pantothenate kinase
b0832	2.14058	3.30953	13.2271	8.33517e-07	9.50148e-06	6.30705	gsiD	glutathione ABC transporter membrane subunit GsiD
b3255	-0.575122	9.2575	-13.2231	8.35535e-07	9.50148e-06	5.39997	accB	biotin carboxyl carrier protein
b1632	-0.783681	6.55618	-13.1993	8.47408e-07	9.61133e-06	5.63762	rsxE	SoxR [2Fe-2S] reducing system protein RsxE
b4291	0.564986	11.9244	13.182	8.56161e-07	9.68532e-06	5.39589	fecA	ferric citrate outer membrane transporter
b1603	1.07135	7.13418	13.1689	8.62859e-07	9.73574e-06	5.53816	pntA	pyridine nucleotide transhydrogenase subunit alpha
b0432	-0.602871	10.6836	-13.1531	8.71026e-07	9.80243e-06	5.36658	cyoA	cytochrome bo3 ubiquinol oxidase subunit 2
b3859	0.686173	9.56132	13.1241	8.86253e-07	9.94802e-06	5.33529	srkA	stress response kinase A
b4369	-1.10445	5.10219	-13.0984	8.99952e-07	1.00757e-05	5.82145	leuP	tRNA-Leu
b2693	-0.808556	7.53149	-13.0322	9.36442e-07	1.04573e-05	5.39814	argY	tRNA-Arg
b1857	0.655345	8.14339	12.9881	9.6162e-07	1.06638e-05	5.29745	znuA	Zn(2(+)) ABC transporter periplasmic binding protein
b0989	-1.18622	5.06057	-12.9876	9.61909e-07	1.06638e-05	5.75883	cspH	CspA family protein CspH
b0807	-0.810122	5.82259	-12.987	9.62294e-07	1.06638e-05	5.61115	rlmF	23S rRNA m(6)A1618 methyltransferase
b3433	0.654686	8.18671	12.9711	9.71569e-07	1.07392e-05	5.28181	asd	aspartate-semialdehyde dehydrogenase
b3730	0.570776	8.02118	12.9651	9.751e-07	1.07508e-05	5.29398	glmU	fused N-acetylglucosamine-1-phosphate uridyltransferase and glucosamine-1-phosphate acetyltransferase
b4488	0.951814	6.28766	12.9605	9.77802e-07	1.07533e-05	5.51635	ilvG	acetolactate synthase II subunit IlvG%2C N-terminal fragment (pseudogene)
b2069	-0.988342	5.96655	-12.933	9.94203e-07	1.09061e-05	5.55503	yegD	HSP70 family protein YegD
b0417	-0.872204	6.42407	-12.9234	1e-06	1.09313e-05	5.47496	thiL	thiamine monophosphate kinase
b3943	-0.941684	5.30519	-12.9209	1.00153e-06	1.09313e-05	5.66176	yijE	cystine exporter
b2157	0.734871	6.90634	12.8691	1.03353e-06	1.12522e-05	5.36325	yeiE	putative LysR-type transcriptional regulator YeiE
b4350	0.616424	7.9667	12.8585	1.0402e-06	1.12966e-05	5.22834	hsdR	type I restriction enzyme EcoKI endonuclease component
b1825	-0.774861	6.94118	-12.8245	1.06198e-06	1.15043e-05	5.33312	yebO	uncharacterized protein YebO
b0737	-0.589729	8.3943	-12.7987	1.07886e-06	1.16316e-05	5.15038	tolQ	Tol-Pal system protein TolQ
b2290	-0.649538	7.8772	-12.7983	1.07909e-06	1.16316e-05	5.20024	alaA	glutamate--pyruvate aminotransferase AlaA
b0483	-0.922622	5.40428	-12.7054	1.14239e-06	1.22835e-05	5.49808	ybaQ	putative DNA-binding transcriptional regulator YbaQ
b2815	-1.06716	7.40624	-12.6662	1.17032e-06	1.25527e-05	5.16897	metW	tRNA-Met
b3110	-1.11702	5.62661	-12.6434	1.18697e-06	1.2637e-05	5.42145	cyuP	putative D/L-serine transporter
b0711	1.06669	5.59186	12.6432	1.18706e-06	1.2637e-05	5.41861	pxpB	5-oxoprolinase component B
b1905	-0.751406	6.41944	-12.643	1.18726e-06	1.2637e-05	5.28316	ftnA	ferritin iron storage protein
b4678	-1.1831	4.82445	-12.6395	1.18981e-06	1.2637e-05	5.56956	yoeI	uncharacterized protein YoeI
b4259	0.6721	6.52103	12.6323	1.19512e-06	1.26625e-05	5.25519	holC	DNA polymerase III subunit chi
b3661	0.995534	5.26742	12.6047	1.21575e-06	1.28497e-05	5.44859	nlpA	lipoprotein-28
b1870	-0.73469	6.00328	-12.5742	1.23893e-06	1.30414e-05	5.30001	cmoA	carboxy-S-adenosyl-L-methionine synthase
b0590	1.33095	5.75551	12.573	1.23989e-06	1.30414e-05	5.34857	fepD	ferric enterobactin ABC transporter membrane subunit FebD
b1629	-0.593913	7.52034	-12.5352	1.26935e-06	1.33189e-05	5.05967	rsxC	SoxR [2Fe-2S] reducing system protein RsxC
b2025	0.84536	5.48045	12.5	1.29756e-06	1.35644e-05	5.33496	hisF	imidazole glycerol phosphate synthase subunit HisF
b1414	0.898364	5.08066	12.4979	1.29931e-06	1.35644e-05	5.4073	ydcF	DUF218 domain-containing protein YdcF
b3957	0.737482	6.24712	12.4944	1.3021e-06	1.35644e-05	5.20223	argE	acetylornithine deacetylase
b1633	-0.682846	6.55592	-12.4791	1.31465e-06	1.36623e-05	5.1489	nth	endonuclease III
b3064	-0.779599	7.11901	-12.4447	1.34325e-06	1.39262e-05	5.0486	tsaD	N(6)-L-threonylcarbamoyladenine synthase%2C TsaD subunit
b0636	-0.570504	7.76244	-12.4273	1.35799e-06	1.4007e-05	4.95665	rlmH	23S rRNA m(3)psi1915 methyltransferase
b2695	-0.799093	8.11132	-12.4211	1.36332e-06	1.4007e-05	4.91881	serV	tRNA-Ser
b3071	1.21199	4.35986	12.4208	1.36353e-06	1.4007e-05	5.5053	nfeR	DNA-binding transcriptional repressor NfeR
b0456	-0.960722	5.70528	-12.4162	1.36754e-06	1.4007e-05	5.24648	ybaA	DUF1428 domain-containing protein YbaA
b3962	-0.690455	7.87851	-12.4153	1.36831e-06	1.4007e-05	4.93668	sthA	soluble pyridine nucleotide transhydrogenase
b4720	5.74957	-2.42439	12.4129	1.37039e-06	1.4007e-05	5.52974	ytiC	protein YtiC
b4484	0.519179	10.8751	12.4029	1.37899e-06	1.40401e-05	4.85721	cpxP	periplasmic protein CpxP
b2665	0.888352	5.42746	12.4017	1.38009e-06	1.40401e-05	5.27722	kbp	K(+) binding protein
b2308	-1.1344	4.25344	-12.3731	1.40511e-06	1.42612e-05	5.50313	hisQ	lysine/arginine/ornithine ABC transporter/histidine ABC transporter%2C membrane subunit HisQ
b0461	0.593366	8.40894	12.3504	1.42544e-06	1.44338e-05	4.83501	tomB	protein that modulates Hha toxicity
b1667	-0.64877	7.54085	-12.3382	1.43647e-06	1.45117e-05	4.9203	ydhR	putative monooxygenase YdhR
b3816	-0.566723	7.88398	-12.2796	1.4908e-06	1.50256e-05	4.83952	corA	Ni(2(+))/Co(2(+))/Mg(2(+)) transporter
b2479	0.74461	6.53584	12.2422	1.52663e-06	1.53481e-05	4.98249	gcvR	putative transcriptional regulator GcvR
b0889	0.627291	8.61228	12.2389	1.52986e-06	1.53481e-05	4.74252	lrp	DNA-binding transcriptional dual regulator Lrp
b3860	0.630908	8.75188	12.2225	1.54595e-06	1.53864e-05	4.72368	dsbA	thiol:disulfide oxidoreductase DsbA
b0390	-0.800976	5.76498	-12.2223	1.54616e-06	1.53864e-05	5.09614	aroM	protein AroM
b1206	-0.679057	6.95703	-12.2222	1.54624e-06	1.53864e-05	4.91243	dauA	aerobic C4-dicarboxylate transporter DauA
b0971	-1.62612	3.734	-12.2205	1.54785e-06	1.53864e-05	5.53357	serT	tRNA-Ser
b2559	-1.0153	5.83515	-12.2124	1.55589e-06	1.5431e-05	5.08244	tadA	tRNA adenosine(34) deaminase
b0841	-0.932236	5.09687	-12.1741	1.59449e-06	1.57778e-05	5.18624	ybjG	undecaprenyl pyrophosphate phosphatase
b3390	-0.53115	9.29995	-12.1564	1.6126e-06	1.58969e-05	4.66839	aroK	shikimate kinase 1
b0723	-0.776609	5.6338	-12.1552	1.61385e-06	1.58969e-05	5.07126	sdhA	succinate:quinone oxidoreductase%2C FAD binding protein
b0865	1.41577	3.2775	12.1254	1.64497e-06	1.61668e-05	5.53992	ybjP	DUF3828 domain-containing lipoprotein YbjP
b2965	-0.744727	5.76642	-12.1208	1.64989e-06	1.61786e-05	5.02273	speC	ornithine decarboxylase%2C biosynthetic
b2526	0.495808	9.53645	12.0677	1.70729e-06	1.67038e-05	4.60571	hscA	iron-sulfur cluster biosynthesis chaperone HscA
b1639	1.2245	4.10482	12.0615	1.71411e-06	1.67328e-05	5.30879	mliC	inhibitor of c-type lysozyme%2C putative lipoprotein
b0431	-0.557584	11.2429	-12.0252	1.75472e-06	1.70776e-05	4.59205	cyoB	cytochrome bo3 ubiquinol oxidase subunit 1
b3409	0.73035	6.19402	12.023	1.75729e-06	1.70776e-05	4.87826	feoB	Fe(2(+)) transporter FeoB
b4241	0.77327	5.43918	12.0117	1.77022e-06	1.71528e-05	4.99763	treR	DNA-binding transcriptional repressor TreR
b1628	-0.674055	6.36657	-12.0093	1.77293e-06	1.71528e-05	4.84516	rsxB	SoxR [2Fe-2S] reducing system protein RsxB
b3819	-0.747144	5.66136	-11.9739	1.81412e-06	1.75123e-05	4.93634	rarD	putative transporter RarD
b1308	1.07081	4.03665	11.9552	1.83627e-06	1.76868e-05	5.24225	pspE	thiosulfate sulfurtransferase PspE
b0430	-0.492707	9.09994	-11.9351	1.86051e-06	1.78701e-05	4.51035	cyoC	cytochrome bo3 ubiquinol oxidase subunit 3
b2685	-0.655776	6.85593	-11.9326	1.86353e-06	1.78701e-05	4.71885	emrA	multidrug efflux pump membrane fusion protein EmrA
b1826	-1.23337	4.19527	-11.9162	1.88359e-06	1.80227e-05	5.19877	mgrB	PhoQ kinase inhibitor
b2344	-0.586805	8.94511	-11.8813	1.92695e-06	1.83971e-05	4.47598	fadL	long-chain fatty acid outer membrane channel/bacteriophage T2 receptor
b1832	0.645797	7.82056	11.8543	1.96133e-06	1.86843e-05	4.54007	msrC	free methionine-(R)-sulfoxide reductase
b0967	-0.65885	6.95479	-11.8134	2.01476e-06	1.91512e-05	4.61867	rlmI	23S rRNA m(5)C1962 methyltransferase
b3174	-0.567452	7.543	-11.8081	2.02181e-06	1.91763e-05	4.5398	leuU	tRNA-Leu
b1631	-0.713021	6.21858	-11.7921	2.04319e-06	1.93368e-05	4.71122	rsxG	SoxR [2Fe-2S] reducing system protein RsxG
b1478	-0.842017	5.17378	-11.7274	2.13231e-06	2.01131e-05	4.84867	adhP	ethanol dehydrogenase/alcohol dehydrogenase
b1627	-0.690304	6.32668	-11.7259	2.13447e-06	2.01131e-05	4.64577	rsxA	SoxR [2Fe-2S] reducing system protein RsxA
b0628	-0.502644	8.53493	-11.7173	2.14662e-06	2.01838e-05	4.37371	lipA	lipoyl synthase
b3418	0.586989	7.05514	11.7104	2.15653e-06	2.02332e-05	4.52617	malT	DNA-binding transcriptional activator MalT
b3702	-0.518335	8.848	-11.6978	2.17451e-06	2.03579e-05	4.34353	dnaA	chromosomal replication initiator protein DnaA
b2816	-1.21303	7.279	-11.6704	2.21451e-06	2.06878e-05	4.47981	metV	tRNA-Met
b2938	-0.561016	10.2153	-11.6497	2.24512e-06	2.09288e-05	4.30954	speA	arginine decarboxylase%2C biosynthetic
b2151	-1.07916	3.97492	-11.6078	2.30884e-06	2.14766e-05	5.01645	galS	DNA-binding transcriptional dual regulator GalS
b4557	-0.579607	9.19646	-11.5984	2.3234e-06	2.15659e-05	4.26339	yidD	membrane protein insertion efficiency factor
b0160	0.753666	6.00416	11.5823	2.3485e-06	2.17525e-05	4.58761	dgt	dGTP triphosphohydrolase
b0713	0.802474	5.59965	11.5647	2.37633e-06	2.1902e-05	4.64393	pxpA	5-oxoprolinase component A
b2527	0.555776	8.01438	11.5628	2.37936e-06	2.1902e-05	4.30323	hscB	co-chaperone for [Fe-S] cluster biosynthesis
b0678	-0.785411	7.15935	-11.5625	2.37977e-06	2.1902e-05	4.40853	nagB	glucosamine-6-phosphate deaminase
b3387	-0.546341	7.55297	-11.5157	2.45591e-06	2.25549e-05	4.32245	dam	DNA adenine methyltransferase
b3521	1.04088	3.99058	11.4825	2.51129e-06	2.30149e-05	4.90792	yhjC	putative DNA-binding transcriptional regulator YhjC
b3934	0.626062	6.84951	11.475	2.52403e-06	2.30829e-05	4.37893	cytR	DNA-binding transcriptional repressor CytR
b3232	0.606686	6.54305	11.4363	2.59108e-06	2.36463e-05	4.39309	zapE	cell division factor ZapE with ATPase activity
b0884	-0.548606	9.41804	-11.424	2.61272e-06	2.37637e-05	4.13214	infA	translation initiation factor IF-1
b2565	-0.664902	6.9985	-11.4228	2.61488e-06	2.37637e-05	4.32356	recO	DNA repair protein RecO
b0794	0.974595	4.61721	11.403	2.65016e-06	2.4034e-05	4.7135	ybhF	putative ABC exporter ATP binding subunit
b3399	0.579509	7.04955	11.3958	2.66314e-06	2.41014e-05	4.29263	yrfG	purine nucleotidase
b2396	-1.37836	4.67461	-11.366	2.71764e-06	2.4495e-05	4.69863	alaX	tRNA-Ala
b1379	0.726604	6.03525	11.3659	2.71791e-06	2.4495e-05	4.4205	hslJ	lipoprotein implicated in Novobiocin resistance
b0391	0.638936	6.58016	11.3597	2.72934e-06	2.45471e-05	4.3304	ppnP	nucleoside phosphorylase PpnP
b4065	0.829223	5.6669	11.3526	2.74263e-06	2.46156e-05	4.47396	yjcE	putative transporter YjcE
b2480	0.533327	8.22442	11.3178	2.80853e-06	2.51552e-05	4.0971	bcp	thiol peroxidase
b4188	1.03015	4.34633	11.3044	2.83431e-06	2.53338e-05	4.69773	yjfN	protease activator
b3643	-0.563852	7.61353	-11.3003	2.84229e-06	2.5353e-05	4.1531	rph	truncated RNase PH
b3599	1.47563	7.35524	11.2905	2.86136e-06	2.54708e-05	4.18514	mtlA	mannitol-specific PTS enzyme IICBA component
b2926	0.616377	8.74095	11.2677	2.90645e-06	2.58193e-05	4.02218	pgk	phosphoglycerate kinase
b0954	-0.547248	9.52323	-11.2586	2.92457e-06	2.5923e-05	4.00762	fabA	beta-hydroxyacyl-acyl carrier protein dehydratase/isomerase
b1283	0.688324	7.86418	11.2559	2.93006e-06	2.5923e-05	4.08954	osmB	osmotically-inducible lipoprotein OsmB
b1421	-1.21742	4.6307	-11.2429	2.95641e-06	2.61029e-05	4.60817	trg	methyl-accepting chemotaxis protein Trg
b0197	0.748832	7.35783	11.2351	2.97218e-06	2.61889e-05	4.13355	metQ	L-methionine/D-methionine ABC transporter membrane anchored binding protein
b1053	-1.00278	4.2264	-11.2064	3.03159e-06	2.66583e-05	4.65897	mdtG	efflux pump MdtG
b0899	-2.20211	2.42423	-11.1967	3.05191e-06	2.67828e-05	5.1157	ycaM	putative transporter YcaM
b3515	-1.5723	2.95975	-11.1859	3.07476e-06	2.69159e-05	4.95436	gadW	DNA-binding transcriptional dual regulator GadW
b2795	0.604929	7.6397	11.1837	3.07946e-06	2.69159e-05	4.05964	ppnN	nucleotide 5'-monophosphate nucleosidase
b3183	-0.534031	9.86742	-11.1722	3.10403e-06	2.70426e-05	3.9454	obgE	GTPase ObgE
b0879	0.805232	5.27472	11.1711	3.10641e-06	2.70426e-05	4.40671	macB	ABC-type tripartite efflux pump ATP binding/membrane subunit
b2471	0.906298	4.92119	11.149	3.15425e-06	2.74015e-05	4.45903	yffB	putative reductase YffB
b0494	0.699282	5.66934	11.1458	3.16112e-06	2.74015e-05	4.3143	tesA	multifunctional acyl-CoA thioesterase I and protease I and lysophospholipase L1
b3476	-1.59362	3.49089	-11.1434	3.16656e-06	2.74015e-05	4.80499	nikA	Ni(2(+)) ABC transporter periplasmic binding protein
b4222	0.587718	6.63548	11.1327	3.18993e-06	2.75489e-05	4.14885	ytfP	gamma-glutamylamine cyclotransferase family protein YtfP
b1247	-0.604642	6.911	-11.1163	3.22652e-06	2.77815e-05	4.10134	oppF	murein tripeptide ABC transporter/oligopeptide ABC transporter ATP binding subunit OppF
b2379	0.783332	5.28028	11.1149	3.22967e-06	2.77815e-05	4.36216	alaC	glutamate--pyruvate aminotransferase AlaC
b0851	1.01195	5.77602	11.0946	3.27554e-06	2.81204e-05	4.26185	nfsA	NADPH-dependent nitroreductase NfsA
b2306	-1.17029	3.76563	-11.0846	3.29844e-06	2.82536e-05	4.67617	hisP	lysine/arginine/ornithine ABC transporter/histidine ABC transporter%2C ATP binding subunit
b2686	-0.723563	6.47313	-11.0821	3.30406e-06	2.82536e-05	4.13985	emrB	multidrug efflux pump membrane subunit EmrB
b3202	0.507067	9.04925	11.0784	3.31278e-06	2.82726e-05	3.86666	rpoN	RNA polymerase%2C sigma 54 (sigma N) factor
b1911	-0.625592	7.33455	-11.0457	3.38914e-06	2.88675e-05	3.99191	glyW	tRNA-Gly
b3862	-0.831671	5.09327	-11.0333	3.41853e-06	2.90608e-05	4.34214	yihG	putative acyltransferase YihG
b0496	1.17074	6.07005	11.0248	3.43884e-06	2.91764e-05	4.1614	ybbP	putative ABC transporter membrane subunit YbbP
b3835	0.491517	7.82555	10.998	3.50417e-06	2.96727e-05	3.89404	ubiB	ubiquinone biosynthesis protein UbiB
b2171	-0.574209	7.25787	-10.9844	3.53769e-06	2.98938e-05	3.95338	yeiP	elongation factor P family protein
b1918	1.26603	5.11171	10.9818	3.54404e-06	2.98938e-05	4.30325	tcyL	cystine ABC transporter membrane subunit
b0199	0.668016	5.82865	10.9475	3.6306e-06	3.04943e-05	4.13334	metN	L-methionine/D-methionine ABC transporter ATP binding subunit
b3175	-0.548536	10.9272	-10.9455	3.63565e-06	3.04943e-05	3.77994	secG	Sec translocon subunit SecG
b2912	-0.597101	7.4916	-10.9407	3.64812e-06	3.04943e-05	3.89071	fau	putative 5-formyltetrahydrofolate cyclo-ligase
b3783	-0.581161	11.7056	-10.9405	3.64851e-06	3.04943e-05	3.78248	rho	transcription termination factor Rho
b0637	-0.548651	7.62086	-10.9398	3.65033e-06	3.04943e-05	3.87427	rsfS	ribosomal silencing factor RsfS
b3431	0.712316	5.50304	10.9307	3.6739e-06	3.06323e-05	4.17762	glgX	limit dextrin alpha-1%2C6-glucohydrolase
b1200	0.897119	5.81188	10.8735	3.82528e-06	3.18334e-05	4.08167	dhaK	dihydroxyacetone kinase subunit K
b2466	0.675783	5.87419	10.8594	3.86364e-06	3.20911e-05	4.05693	ypfG	DUF1176 domain-containing protein YpfG
b3603	-0.824997	5.32896	-10.8337	3.93466e-06	3.25841e-05	4.14245	lldP	lactate/glycolate:H(+) symporter LldP
b4221	0.585505	7.26665	10.8325	3.93799e-06	3.25841e-05	3.83137	tamB	translocation and assembly module subunit TamB
b1482	1.11128	4.81268	10.813	3.99308e-06	3.29771e-05	4.22536	osmC	osmotically inducible peroxiredoxin
b2558	-0.75271	5.20411	-10.8093	4.00363e-06	3.30014e-05	4.14462	mltF	membrane-bound lytic murein transglycosylase F
b2796	0.548329	8.66136	10.796	4.04162e-06	3.32515e-05	3.65878	sdaC	serine:H(+) symporter SdaC
b3553	0.55487	7.01342	10.7878	4.06532e-06	3.33832e-05	3.8277	ghrB	glyoxylate reductase
b2832	-0.638404	6.33517	-10.7823	4.0813e-06	3.34512e-05	3.92513	ygdQ	UPF0053 inner membrane protein YgdQ
b0874	-0.703627	5.78285	-10.7663	4.12824e-06	3.37722e-05	4.00397	lysO	L-lysine exporter
b3895	-0.622642	6.06869	-10.7613	4.1429e-06	3.38285e-05	3.95033	fdhD	sulfurtransferase for molybdenum cofactor sulfuration
b4156	-1.11878	4.41315	-10.7268	4.24658e-06	3.45984e-05	4.25188	yjeM	putative transporter YjeM
b1909	-0.583284	7.90871	-10.7246	4.25312e-06	3.45984e-05	3.67244	leuZ	tRNA-Leu
b4245	-1.59522	2.89699	-10.7015	4.32422e-06	3.5111e-05	4.60201	pyrB	aspartate carbamoyltransferase catalytic subunit
b3365	-0.842623	4.74346	-10.6849	4.37624e-06	3.54671e-05	4.13877	nirB	nitrite reductase catalytic subunit NirB
b3471	-0.914386	4.96008	-10.6807	4.38941e-06	3.55076e-05	4.09412	yhhQ	putative queuosine precursor transporter
b3764	-0.819285	7.15659	-10.6675	4.43146e-06	3.57812e-05	3.71941	maoP	macrodomain Ori protein
b2026	0.838295	5.53918	10.6586	4.45987e-06	3.59227e-05	3.95876	hisI	putative bifunctional phosphoribosyl-AMP cyclohydrolase/phosphoribosyl-ATP pyrophosphatase
b2431	0.494387	7.50745	10.6568	4.46553e-06	3.59227e-05	3.66227	yfeX	porphyrinogen peroxidase
b3751	0.649257	6.85875	10.6514	4.48305e-06	3.5997e-05	3.74055	rbsB	ribose ABC transporter periplasmic binding protein
b1858	0.643409	6.08796	10.6409	4.51713e-06	3.62037e-05	3.84825	znuC	Zn(2(+)) ABC transporter ATP binding subunit
b3343	0.952634	6.1773	10.6157	4.60018e-06	3.67785e-05	3.81747	tusB	sulfurtransferase complex subunit TusB
b0072	0.843441	4.5033	10.614	4.60577e-06	3.67785e-05	4.12506	leuC	3-isopropylmalate dehydratase subunit LeuC
b2595	0.473092	9.02305	10.5901	4.68623e-06	3.73522e-05	3.48133	bamD	outer membrane protein assembly factor BamD
b3804	0.613495	6.40957	10.5805	4.71897e-06	3.75443e-05	3.74863	hemD	uroporphyrinogen-III synthase
b3210	0.515814	7.6702	10.5755	4.73593e-06	3.76104e-05	3.57777	arcB	sensory histidine kinase ArcB
b0685	-0.640077	6.70605	-10.5695	4.75681e-06	3.77073e-05	3.70024	ybfE	LexA-regulated protein
b2576	-0.464484	8.47405	-10.5475	4.83329e-06	3.8235e-05	3.47538	srmB	ATP-dependent RNA helicase SrmB
b1630	-0.618314	6.66871	-10.5453	4.84098e-06	3.8235e-05	3.68582	rsxD	SoxR [2Fe-2S] reducing system protein RsxD
b1285	-1.05783	4.55942	-10.5293	4.89768e-06	3.86126e-05	4.06081	pdeR	cyclic di-GMP phosphodiesterase PdeR
b4352	0.859792	4.87055	10.5081	4.97387e-06	3.91422e-05	3.96548	yjiA	P-loop guanosine triphosphatase
b2066	-0.631837	6.474	-10.5032	4.99193e-06	3.92133e-05	3.68076	udk	uridine/cytidine kinase
b1704	-0.622602	6.03255	-10.4999	5.00403e-06	3.92373e-05	3.74707	aroH	3-deoxy-7-phosphoheptulonate synthase%2C Trp-sensitive
b0738	-0.546736	7.47845	-10.4823	5.06879e-06	3.96736e-05	3.5268	tolR	Tol-Pal system protein TolR
b3358	0.615363	6.65786	10.4674	5.12433e-06	4.0035e-05	3.62023	yhfK	putative transporter YhfK
b2214	-0.623381	6.57921	-10.465	5.13341e-06	4.0035e-05	3.63389	ftp	FAD:protein FMN transferase
b0756	0.649426	6.96236	10.4607	5.14959e-06	4.00893e-05	3.57289	galM	galactose-1-epimerase
b1424	0.494921	7.79428	10.4506	5.1878e-06	4.03145e-05	3.46201	opgD	glucan biosynthesis protein D
b1451	-0.624609	7.41127	-10.4473	5.20026e-06	4.03392e-05	3.50727	yncD	putative TonB-dependent outer membrane receptor
b2217	0.484975	8.43348	10.4409	5.2247e-06	4.04565e-05	3.38831	rcsB	DNA-binding transcriptional activator RcsB
b3805	0.548821	7.72176	10.4363	5.24235e-06	4.05209e-05	3.45908	hemC	hydroxymethylbilane synthase
b1251	0.869176	4.80025	10.4335	5.25299e-06	4.05311e-05	3.91923	yciI	protein YciI
b3965	-0.513696	7.52564	-10.4195	5.30763e-06	4.088e-05	3.46982	trmA	tRNA m(5)U54 methyltransferase
b1623	0.570831	7.21783	10.4071	5.35624e-06	4.11814e-05	3.49596	add	adenosine deaminase
b2416	0.430836	10.4865	10.4022	5.37553e-06	4.12567e-05	3.3422	ptsI	PTS enzyme I
b1535	0.687935	5.7437	10.3823	5.45475e-06	4.17909e-05	3.69729	dgcZ	diguanylate cyclase DgcZ
b1663	-0.654842	6.29453	-10.3689	5.50882e-06	4.20944e-05	3.59927	mdtK	multidrug efflux pump MdtK
b0203	-1.54381	3.17792	-10.3677	5.51374e-06	4.20944e-05	4.26964	alaV	tRNA-Ala
b1613	0.680696	6.78567	10.3572	5.55701e-06	4.23503e-05	3.5129	manA	mannose-6-phosphate isomerase
b1594	1.1261	5.32078	10.3491	5.59018e-06	4.25284e-05	3.7563	mlc	DNA-binding transcriptional repressor Mlc
b3772	0.648921	5.62959	10.3374	5.63878e-06	4.28232e-05	3.68004	ilvA	threonine deaminase
b4716	0.490769	7.87548	10.3284	5.67662e-06	4.30353e-05	3.35263	cpxQ	small regulatory RNA CpxQ
b0126	-0.509298	7.80567	-10.2971	5.80982e-06	4.39684e-05	3.33684	can	carbonic anhydrase 2
b2298	-1.13731	3.44683	-10.2611	5.96736e-06	4.50821e-05	4.09841	yfcC	putative transporter YfcC
b4024	0.659466	6.54344	10.2466	6.03252e-06	4.54953e-05	3.45661	lysC	aspartate kinase III
b0176	0.425589	9.35204	10.244	6.04395e-06	4.55025e-05	3.1984	rseP	intramembrane zinc metalloprotease
b1440	-1.14138	3.26573	-10.2351	6.08413e-06	4.56654e-05	4.11973	ydcS	putative ABC transporter periplasmic binding protein/polyhydroxybutyrate synthase
b2107	0.787363	4.99263	10.2346	6.08661e-06	4.56654e-05	3.71694	rcnB	periplasmic protein involved in nickel/cobalt export
b2213	-0.670421	5.97051	-10.2015	6.23908e-06	4.67285e-05	3.51385	ada	DNA-binding transcriptional dual regulator/DNA repair protein Ada
b0356	0.668811	7.70584	10.1946	6.27134e-06	4.68893e-05	3.26254	frmA	S-(hydroxymethyl)glutathione dehydrogenase
b0908	0.539542	7.70471	10.1757	6.36095e-06	4.74776e-05	3.24633	aroA	3-phosphoshikimate 1-carboxyvinyltransferase
b4408	0.600297	6.42696	10.1499	6.48549e-06	4.83241e-05	3.39336	csrB	small regulatory RNA CsrB
b3173	-1.0258	4.29782	-10.1451	6.50908e-06	4.84169e-05	3.80379	yhbX	putative hydrolase%2C inner membrane
b3107	0.908803	4.64337	10.1417	6.52569e-06	4.84575e-05	3.71299	yhaL	uncharacterized protein YhaL
b0026	0.520861	10.1001	10.1297	6.58463e-06	4.88117e-05	3.11308	ileS	isoleucine--tRNA ligase
b1973	1.77061	3.46361	10.118	6.6433e-06	4.91627e-05	3.99651	zinT	metal-binding protein ZinT
b2622	0.72867	6.57721	10.1088	6.68927e-06	4.94187e-05	3.3379	intA	CP4-57 prophage%3B integrase
b1989	-2.25646	1.82897	-10.1022	6.72272e-06	4.95815e-05	4.38726	asnV	tRNA-Asn
b4270	-1.20784	3.03504	-10.096	6.75444e-06	4.9731e-05	4.06384	leuX	tRNA-Leu
b3714	-0.572892	7.58371	-10.0835	6.8182e-06	5.00812e-05	3.18534	adeP	adenine:H(+) symporter
b4553	1.23744	3.18957	10.0822	6.82506e-06	5.00812e-05	4.0035	ysaB	putative lipoprotein YsaB
b2939	-0.723831	6.15863	-10.0696	6.89061e-06	5.04453e-05	3.37392	yqgB	acid stress response protein YqgB
b0869	0.595946	5.96058	10.0682	6.89791e-06	5.04453e-05	3.39981	ybjT	putative NAD(P)-dependent oxidoreductase YbjT
b3605	-0.90195	4.04057	-10.0644	6.91795e-06	5.05068e-05	3.78951	lldD	L-lactate dehydrogenase
b2599	0.62604	7.37142	10.0579	6.95203e-06	5.06705e-05	3.18802	pheA	fused chorismate mutase/prephenate dehydratase
b3094	0.455474	7.65291	9.97983	7.37714e-06	5.36789e-05	3.08769	exuR	DNA-binding transcriptional repressor ExuR
b3636	-0.409292	10.1852	-9.95222	7.53437e-06	5.47313e-05	2.9642	rpmG	50S ribosomal subunit protein L33
b1539	0.519466	6.61621	9.93051	7.66065e-06	5.54551e-05	3.1795	ydfG	3-hydroxy acid dehydrogenase
b3637	-0.421469	11.6773	-9.929	7.66956e-06	5.54551e-05	2.95681	rpmB	50S ribosomal subunit protein L28
b0583	1.89842	2.23578	9.92853	7.67231e-06	5.54551e-05	4.13412	entD	phosphopantetheinyl transferase EntD
b0198	0.638131	5.91892	9.9263	7.68543e-06	5.54577e-05	3.28745	metI	L-methionine/D-methionine ABC transporter membrane subunit
b1279	0.531695	6.52013	9.91896	7.72883e-06	5.56784e-05	3.18407	lapA	lipopolysaccharide assembly protein A
b1530	0.646323	5.90283	9.89849	7.85121e-06	5.64183e-05	3.26662	marR	DNA-binding transcriptional repressor MarR
b4411	-0.696693	5.57652	-9.89665	7.86237e-06	5.64183e-05	3.32786	ecnB	bacteriolytic entericidin B lipoprotein
b1161	-1.10382	4.15169	-9.89356	7.88103e-06	5.64183e-05	3.62986	ycgX	uncharacterized protein YcgX
b0681	-1.03251	3.59741	-9.89316	7.88349e-06	5.64183e-05	3.7541	chiP	chitobiose outer membrane channel
b1246	-0.607754	6.94718	-9.84435	8.18562e-06	5.84841e-05	3.0637	oppD	murein tripeptide ABC transporter/oligopeptide ABC transporter ATP binding subunit OppD
b4208	-0.441935	8.84493	-9.83006	8.27645e-06	5.9036e-05	2.85701	cycA	serine/alanine/glycine/cycloserine:H(+)symporter
b3084	-0.515805	7.34459	-9.82773	8.29141e-06	5.90457e-05	2.99701	rlmG	23S rRNA m(2)G1835 methyltransferase
b3633	-0.494728	7.86491	-9.80342	8.44887e-06	6.00318e-05	2.91443	waaA	KDO transferase
b1664	0.585875	6.28559	9.8021	8.45752e-06	6.00318e-05	3.12118	ydhQ	adhesin-like autotransporter YdhQ
b3259	-0.514904	7.05047	-9.78429	8.57522e-06	6.0768e-05	2.99707	prmA	methyltransferase for 50S ribosomal subunit protein L11
b0890	0.405804	10.038	9.77819	8.61588e-06	6.09567e-05	2.81391	ftsK	cell division DNA translocase FtsK
b0843	1.09301	3.96469	9.77338	8.64816e-06	6.10855e-05	3.55812	ybjH	uncharacterized protein YbjH
b3842	-0.618239	5.98035	-9.75808	8.75163e-06	6.17161e-05	3.13667	rfaH	transcription antiterminator RfaH
b1445	-1.07499	3.91147	-9.74896	8.81399e-06	6.20551e-05	3.56099	ortT	orphan toxin OrtT
b4232	0.515411	6.92335	9.74243	8.8589e-06	6.21795e-05	2.97524	fbp	fructose-1%2C6-bisphosphatase 1
b0661	-0.469574	7.62516	-9.74223	8.86029e-06	6.21795e-05	2.88903	miaB	isopentenyl-adenosine A37 tRNA methylthiolase
b3539	-0.646524	6.14158	-9.72835	8.95667e-06	6.27545e-05	3.08493	yhjV	putative transporter YhjV
b3233	0.438769	8.19897	9.71487	9.0514e-06	6.33161e-05	2.79924	yhcB	conserved protein YhcB
b0839	0.552007	6.77454	9.71167	9.07407e-06	6.33726e-05	2.96937	dacC	D-alanyl-D-alanine carboxypeptidase DacC
b0415	-0.436556	8.49615	-9.70864	9.09557e-06	6.34208e-05	2.7712	ribE	6%2C7-dimethyl-8-ribityllumazine synthase
b3076	-0.856297	4.15593	-9.69397	9.20052e-06	6.40498e-05	3.44792	ebgA	evolved beta-D-galactosidase subunit alpha
b0104	-0.589569	6.82129	-9.6808	9.29585e-06	6.46099e-05	2.94006	guaC	GMP reductase
b3704	-0.553093	10.1433	-9.67774	9.31821e-06	6.46618e-05	2.72763	rnpA	RNase P protein component
b2570	0.454943	7.89711	9.64217	9.58193e-06	6.63858e-05	2.76895	rseC	protein RseC
b2905	0.71586	6.28082	9.6352	9.6346e-06	6.66444e-05	2.9788	gcvT	aminomethyltransferase
b0193	-1.05631	4.11828	-9.59457	9.94804e-06	6.87031e-05	3.37925	yaeF	peptidase C92 family protein
b3244	0.42691	8.16731	9.58593	1.00161e-05	6.90637e-05	2.69006	tldD	metalloprotease TldD
b0739	-0.457211	9.17117	-9.52624	1.05011e-05	7.22925e-05	2.58633	tolA	Tol-Pal system protein TolA
b1684	1.56058	2.22697	9.50608	1.06706e-05	7.33437e-05	3.761	sufA	iron-sulfur cluster insertion protein SufA
b1229	-0.924264	4.36914	-9.49602	1.07564e-05	7.37542e-05	3.23058	tpr	protamine-like protein
b3827	0.762469	6.43921	9.4951	1.07643e-05	7.37542e-05	2.83198	bioP	biotin transporter
b3478	-1.56696	2.22922	-9.47076	1.09752e-05	7.50809e-05	3.74852	nikC	Ni(2(+)) ABC transporter membrane subunit NikC
b2958	0.670486	5.60792	9.46352	1.10389e-05	7.53798e-05	2.9409	yggN	putative EcfF
b4473	0.805636	5.57442	9.46185	1.10536e-05	7.53798e-05	2.94786	smf	protein Smf
b1732	1.81064	1.92124	9.454	1.11232e-05	7.57351e-05	3.79729	katE	catalase II
b1682	1.03317	3.61536	9.44692	1.11863e-05	7.60457e-05	3.35437	sufC	Fe-S cluster scaffold complex subunit SufC
b3188	-0.970477	4.49934	-9.42905	1.13475e-05	7.70209e-05	3.14465	sfsB	putative transcriptional regulator SfsB
b1481	2.72471	0.91053	9.42041	1.14263e-05	7.73692e-05	3.9528	bdm	biofilm-dependent modulation protein
b4456	1.1042	6.50271	9.41953	1.14344e-05	7.73692e-05	2.76138	glmZ	small regulatory RNA GlmZ
b4654	-1.38914	2.65493	-9.40339	1.15834e-05	7.81935e-05	3.58
b1845	0.564404	6.33253	9.40244	1.15922e-05	7.81935e-05	2.76427	ptrB	oligopeptidase B
b0846	1.20909	3.5378	9.39771	1.16364e-05	7.82717e-05	3.33595	rcdA	DNA-binding transcriptional regulator RcdA
b0757	0.548346	5.96762	9.39734	1.16398e-05	7.82717e-05	2.81902	galK	galactokinase
b4258	0.398153	10.1991	9.39249	1.16853e-05	7.83965e-05	2.47751	valS	valine--tRNA ligase
b4376	0.752509	5.73863	9.39151	1.16945e-05	7.83965e-05	2.85509	osmY	periplasmic chaperone OsmY
b3785	-0.464555	8.15821	-9.36764	1.19213e-05	7.9794e-05	2.50091	wzzE	enterobacterial common antigen polysaccharide co-polymerase
b3935	-0.489638	6.77024	-9.36056	1.19895e-05	8.00565e-05	2.66381	priA	primosome factor N'
b2322	-0.675865	5.29638	-9.35789	1.20154e-05	8.00565e-05	2.91075	yfcJ	putative transporter YfcJ
b0730	0.700424	5.04567	9.35784	1.20159e-05	8.00565e-05	2.95368	mngR	DNA-binding transcriptional repressor MngR
b0065	0.66512	6.33768	9.34627	1.21286e-05	8.06837e-05	2.71439	yabI	DedA family protein YabI
b1707	-0.966201	4.62695	-9.33723	1.22174e-05	8.10449e-05	3.03506	ydiV	anti-FlhDC factor
b1048	0.57714	8.98331	9.33695	1.22202e-05	8.10449e-05	2.41871	opgG	osmoregulated periplasmic glucans (OPGs) biosynthesis protein G
b1602	1.00566	6.76154	9.33037	1.22852e-05	8.13523e-05	2.64191	pntB	pyridine nucleotide transhydrogenase subunit beta
b2777	-0.616948	5.31537	-9.32354	1.23533e-05	8.16787e-05	2.87507	queE	putative 7-carboxy-7-deazaguanine synthase QueE
b3407	0.410897	8.02455	9.30087	1.25822e-05	8.30652e-05	2.45224	yhgF	putative RNA-binding protein YhgF
b0073	0.878621	4.3787	9.29085	1.26848e-05	8.36155e-05	3.03588	leuB	3-isopropylmalate dehydrogenase
b0237	0.490385	9.16272	9.27564	1.28424e-05	8.45263e-05	2.36113	pepD	peptidase D
b3441	0.820852	4.03572	9.27288	1.28712e-05	8.45877e-05	3.0953	yhhY	N-acetyltransferase YhhY
b3672	1.39333	2.53037	9.27062	1.28948e-05	8.4615e-05	3.47797	ivbL	ilvBN operon leader peptide
b0416	-0.501602	8.46598	-9.24599	1.31558e-05	8.61976e-05	2.36512	nusB	transcription antitermination protein NusB
b0523	-0.676856	5.31944	-9.23584	1.32652e-05	8.67829e-05	2.79707	purE	N(5)-carboxyaminoimidazole ribonucleotide mutase
b0991	-0.594765	7.11817	-9.22623	1.33695e-05	8.73339e-05	2.49671	ymcE	protein YmcE
b2510	-0.650055	5.61218	-9.21581	1.34837e-05	8.78567e-05	2.72367	yfgJ	zinc ribbon domain-containing protein YfgJ
b3432	0.709831	6.95271	9.21524	1.349e-05	8.78567e-05	2.50702	glgB	1%2C4-alpha-glucan branching enzyme
b2742	0.750163	7.34941	9.20753	1.35752e-05	8.82796e-05	2.44935	nlpD	murein hydrolase activator NlpD
b2833	0.638079	5.62295	9.19397	1.37267e-05	8.91311e-05	2.6967	ygdR	DUF903 domain-containing lipoprotein YgdR
b1281	-0.592254	6.31764	-9.17275	1.39673e-05	9.05582e-05	2.56408	pyrF	orotidine-5'-phosphate decarboxylase
b1680	0.797758	4.35584	9.16993	1.39997e-05	9.06332e-05	2.93035	sufS	L-cysteine desulfurase
b2699	0.38152	9.95399	9.15577	1.41634e-05	9.14376e-05	2.2613	recA	DNA recombination/repair protein RecA
b0598	0.950873	5.25119	9.15553	1.41661e-05	9.14376e-05	2.73716	cstA	carbon starvation protein A
b2412	0.512587	8.99261	9.15271	1.4199e-05	9.15137e-05	2.25145	zipA	cell division protein ZipA
b0904	0.609122	5.33616	9.1472	1.42634e-05	9.17931e-05	2.70664	focA	formate channel FocA
b0429	-0.391749	8.788	-9.13051	1.44606e-05	9.28688e-05	2.23919	cyoD	cytochrome bo3 ubiquinol oxidase subunit 4
b2230	-0.873583	4.25373	-9.12944	1.44733e-05	9.28688e-05	2.92793	yfaA	DUF2138 domain-containing protein YfaA
b4567	3.36341	0.476735	9.12481	1.45286e-05	9.30858e-05	3.74079	yjjZ	protein YjjZ
b1681	0.953068	4.40833	9.12048	1.45805e-05	9.32809e-05	2.87807	sufD	Fe-S cluster scaffold complex subunit SufD
b1839	0.592358	6.58949	9.11345	1.46653e-05	9.36852e-05	2.46466	yebY	DUF2511 domain-containing protein YebY
b3220	-0.71489	5.10811	-9.09969	1.48327e-05	9.44972e-05	2.71519	yhcG	DUF1016 domain-containing protein YhcG
b0635	-0.456426	8.54252	-9.09943	1.48359e-05	9.44972e-05	2.22557	mrdA	peptidoglycan DD-transpeptidase MrdA
b1902	0.81126	5.31732	9.08824	1.49736e-05	9.52348e-05	2.66004	ftnB	putative ferritin-like protein
b3966	0.476354	7.90975	9.074	1.5151e-05	9.62224e-05	2.25947	btuB	cobalamin/cobinamide outer membrane transporter
b2694	-0.621066	8.47683	-9.06043	1.53221e-05	9.71669e-05	2.19764	argV	tRNA-Arg
b3237	-0.500375	6.45372	-9.05631	1.53745e-05	9.73572e-05	2.43538	argR	DNA-binding transcriptional dual regulator ArgR
b3544	0.514294	7.08355	9.04234	1.55538e-05	9.8349e-05	2.33042	dppA	dipeptide ABC transporter periplasmic binding protein
b2617	0.436627	7.79009	9.03997	1.55844e-05	9.8399e-05	2.24194	bamE	outer membrane protein assembly factor BamE
b1171	0.829962	5.72742	9.02129	1.58282e-05	9.97932e-05	2.52367	ymgD	PF16456 family protein YmgD
b1840	0.42511	7.82266	8.99287	1.62071e-05	0.000101914	2.19464	yebZ	putative inner membrane protein
b0177	0.401738	11.0813	8.99197	1.62192e-05	0.000101914	2.12081	bamA	outer membrane protein assembly factor BamA
b2152	-0.584032	6.1964	-8.99081	1.6235e-05	0.000101914	2.41658	yeiB	DUF418 domain-containing protein YeiB
b0699	1.26617	3.20606	8.98503	1.63135e-05	0.000102259	3.04971	ybfA	DUF2517 domain-containing protein YbfA
b3634	-0.661016	5.95692	-8.97031	1.65152e-05	0.000103374	2.4385	coaD	pantetheine-phosphate adenylyltransferase
b3192	0.423547	7.73093	8.93308	1.70378e-05	0.000106493	2.15004	mlaC	intermembrane phospholipid transport system - periplasmic binding protein
b3604	-1.04616	3.48177	-8.92408	1.7167e-05	0.000107146	2.92977	lldR	DNA-binding transcriptional dual regulator LldR
b4041	0.391456	9.06924	8.92149	1.72043e-05	0.000107225	2.03652	plsB	glycerol-3-phosphate 1-O-acyltransferase
b3240	-0.691638	4.73959	-8.91755	1.72614e-05	0.000107426	2.62156	aaeB	aromatic carboxylic acid efflux pump subunit AaeB
b2216	0.383938	8.41227	8.90816	1.7398e-05	0.000108122	2.05411	rcsD	RcsD phosphotransferase
b1844	0.653225	5.14221	8.89845	1.75406e-05	0.000108852	2.51631	exoX	exonuclease X
b2525	0.434796	7.58542	8.89059	1.7657e-05	0.000109418	2.12788	fdx	reduced ferredoxin
b1103	0.497833	6.22168	8.88843	1.76891e-05	0.000109461	2.31365	hinT	purine nucleoside phosphoramidase
b1661	-0.670982	5.38693	-8.88609	1.7724e-05	0.000109521	2.46398	cfa	cyclopropane fatty acyl phospholipid synthase
b0428	-0.454315	10.0937	-8.87454	1.78973e-05	0.000110435	2.00314	cyoE	heme O synthase
b0402	-0.506571	7.41486	-8.84596	1.83343e-05	0.000112971	2.10845	proY	putative transporter ProY
b3477	-1.69817	2.07112	-8.82996	1.85842e-05	0.000114348	3.22825	nikB	Ni(2(+)) ABC transporter membrane subunit NikB
b2160	0.513599	6.37868	8.82537	1.86565e-05	0.000114631	2.22966	yeiI	putative sugar kinase YeiI
b1253	-0.585341	5.54418	-8.81575	1.88093e-05	0.000115406	2.36682	yciA	acyl-CoA thioesterase
b4756	-1.08148	3.38785	-8.80929	1.89125e-05	0.000115875	2.84802	yqiD	protein YqiD
b4502	-0.900171	4.18703	-8.80161	1.90362e-05	0.000116407	2.64241	yeiW	PF03692 putative metal-chelating domain-containing protein YeiW
b3095	0.38926	8.10849	8.80034	1.90568e-05	0.000116407	1.98266	yqjA	DedA family protein YqjA
b3706	-0.499912	7.07285	-8.79892	1.90797e-05	0.000116407	2.10762	mnmE	5-carboxymethylaminomethyluridine-tRNA synthase GTPase subunit
b1176	0.446312	7.60736	8.79011	1.9223e-05	0.000117118	2.03112	minC	Z-ring positioning protein MinC
b0819	-0.400429	8.14862	-8.7855	1.92984e-05	0.000117254	1.967	ldtB	L%2CD-transpeptidase YbiS
b0433	-0.438151	8.68369	-8.78544	1.92995e-05	0.000117254	1.92495	ampG	muropeptide:H(+) symporter
b1280	0.426546	7.22658	8.7768	1.94417e-05	0.000117954	2.06479	lapB	lipopolysaccharide assembly protein B
b3470	-0.836628	4.60527	-8.77029	1.95498e-05	0.000118444	2.51711	tusA	sulfur transfer protein TusA
b4000	0.398419	9.77581	8.76686	1.9607e-05	0.000118625	1.8982	hupA	DNA-binding protein HU-alpha
b1174	0.532018	6.50591	8.75074	1.98782e-05	0.000120099	2.13991	minE	Z-ring positioning protein MinE
b3705	-0.459286	11.1674	-8.7419	2.00287e-05	0.00012084	1.88764	yidC	membrane protein insertase YidC
b4011	-1.60544	2.54732	-8.73569	2.01351e-05	0.000121313	3.02163	yjaA	stress response protein
b3847	0.563296	8.61437	8.73033	2.02275e-05	0.000121701	1.87427	pepQ	Xaa-Pro dipeptidase
b4438	-1.2953	2.51085	-8.72389	2.03392e-05	0.000122204	2.99973	cyaR	small regulatory RNA CyaR
b0452	0.553929	5.74223	8.72082	2.03927e-05	0.000122356	2.23706	tesB	acyl-CoA thioesterase II
b1220	0.669224	5.09233	8.7109	2.05665e-05	0.000123229	2.35066	ychO	putative invasin YchO
b1531	0.596975	6.35472	8.70893	2.06012e-05	0.000123267	2.12448	marA	DNA-binding transcriptional dual regulator MarA
b2159	0.529217	6.33441	8.70587	2.06553e-05	0.000123353	2.12428	nfo	endonuclease IV
b1693	0.788875	4.3981	8.7049	2.06724e-05	0.000123353	2.49151	aroD	3-dehydroquinate dehydratase
b3918	1.02105	4.76819	8.69767	2.0801e-05	0.00012395	2.41059	cdh	CDP-diacylglycerol diphosphatase
b0960	-0.578508	6.62215	-8.69348	2.08758e-05	0.000124225	2.07256	yccS	putative transporter YccS
b1665	-0.886048	4.83053	-8.69144	2.09124e-05	0.000124273	2.39648	valV	tRNA-Val
b3037	0.424114	8.62535	8.68649	2.10013e-05	0.000124615	1.83034	ygiB	DUF1190 domain-containing protein YgiB
b0423	-0.394909	8.51427	-8.68505	2.10273e-05	0.000124615	1.83977	thiI	tRNA uridine 4-sulfurtransferase
b0064	0.842859	3.75042	8.67404	2.1227e-05	0.000125627	2.6133	araC	DNA-binding transcriptional dual regulator AraC
b4593	1.02178	3.12747	8.64309	2.17997e-05	0.000128841	2.74276	ymgI	uncharacterized protein YmgI
b1910	-0.467156	9.02231	-8.62807	2.2084e-05	0.000130224	1.76386	cysT	tRNA-Cys
b4312	0.859188	5.07535	8.62756	2.20936e-05	0.000130224	2.27809	fimB	regulator for fimA
b2415	0.491339	8.82131	8.6233	2.21752e-05	0.000130527	1.76145	ptsH	phosphocarrier protein HPr
b3808	-0.881412	3.89462	-8.60224	2.25822e-05	0.000132743	2.52264	yzcX	protein YzcX
b0724	-0.622017	5.4083	-8.59714	2.26821e-05	0.000133055	2.18625	sdhB	succinate:quinone oxidoreductase%2C iron-sulfur cluster binding protein
b3428	0.487894	6.56124	8.59641	2.26965e-05	0.000133055	1.98431	glgP	glycogen phosphorylase
b4200	-0.36318	12.2794	-8.5902	2.28188e-05	0.000133591	1.7545	rpsF	30S ribosomal subunit protein S6
b0209	0.530354	6.18974	8.58281	2.29653e-05	0.000134268	2.03024	yafD	endonuclease/exonuclease/phosphatase domain-containing protein YafD
b3226	0.516068	6.33598	8.5758	2.31054e-05	0.000134906	1.99988	nanR	DNA-binding transcriptional dual regulator NanR
b4721	5.48951	-1.15562	8.57101	2.32015e-05	0.000135285	3.22593	ytiD	protein YtiD
b4599	-1.42716	2.40696	-8.56895	2.32431e-05	0.000135346	2.88842	mgtS	small protein MgtS
b0926	0.414253	7.57026	8.5642	2.33391e-05	0.000135723	1.82058	ycbK	DUF882 domain-containing protein YcbK
b1912	-0.518149	6.00661	-8.55478	2.35308e-05	0.000136655	2.03629	pgsA	phosphatidylglycerophosphate synthase
b0772	-0.637807	7.20276	-8.54184	2.37971e-05	0.000138017	1.84762	ybhC	outer membrane lipoprotein YhbC
b3053	0.533262	6.09762	8.53861	2.3864e-05	0.00013822	2.00301	glnE	fused glutamine synthetase deadenylase/glutamine synthetase adenylyltransferase
b0883	-1.16297	3.14972	-8.53399	2.39603e-05	0.000138593	2.65231	serW	tRNA-Ser
b1175	0.488351	8.07292	8.52063	2.42408e-05	0.000140029	1.7205	minD	Z-ring positioning protein MinD
b2241	-1.22014	2.59666	-8.50398	2.45953e-05	0.000141889	2.76727	glpA	anaerobic glycerol-3-phosphate dehydrogenase subunit A
b3534	-0.803526	3.94297	-8.49767	2.47314e-05	0.000142484	2.40789	bcsQ	cellulose biosynthesis protein
b1786	-0.614076	5.20424	-8.49056	2.48856e-05	0.000143171	2.12277	dgcJ	putative diguanylate cyclase DgcJ
b3981	-0.350746	9.4474	-8.48914	2.49165e-05	0.000143171	1.62824	secE	Sec translocon subunit SecE
b0142	-0.54614	5.71769	-8.48052	2.51051e-05	0.000144064	2.01529	folK	2-amino-4-hydroxy-6-hydroxymethyldihydropteridine diphosphokinase
b3725	0.558627	5.79865	8.47563	2.52127e-05	0.000144402	1.99278	pstB	phosphate ABC transporter ATP binding subunit
b3171	-0.932721	5.03389	-8.47483	2.52305e-05	0.000144402	2.1492	metY	tRNA-Met
b3701	-0.408588	8.07739	-8.46882	2.53636e-05	0.000144973	1.67165	dnaN	beta sliding clamp
b3038	0.375022	9.19791	8.46559	2.54355e-05	0.000145193	1.60277	ygiC	putative enzyme with ATPase activity
b2309	-0.723099	5.61197	-8.44987	2.57885e-05	0.000147015	2.00861	hisJ	histidine ABC transporter periplasmic binding protein
b1929	-0.745232	4.64838	-8.43397	2.61514e-05	0.000148888	2.18406	yedE	putative selenium transporter YedE
b1874	0.542219	5.98927	8.42647	2.63244e-05	0.000149677	1.91258	cutC	protein CutC
b0903	0.434562	9.83115	8.42472	2.63649e-05	0.000149711	1.57082	pflB	pyruvate formate-lyase
b0870	0.614319	6.12388	8.42186	2.64312e-05	0.000149782	1.88631	ltaE	low-specificity L-threonine aldolase
b3982	-0.401976	9.66918	-8.42121	2.64464e-05	0.000149782	1.56498	nusG	transcription termination factor NusG
b1271	0.670348	4.97914	8.41592	2.65699e-05	0.000150115	2.09059	yciK	putative oxidoreductase
b1877	-1.52827	2.98409	-8.41573	2.65743e-05	0.000150115	2.60467	yecT	protein YecT
b1435	-0.497761	5.95942	-8.41066	2.66933e-05	0.000150592	1.90463	rlhA	23S rRNA 5-hydroxycytidine C2501 synthase
b1491	-0.695163	4.53877	-8.40781	2.67604e-05	0.000150775	2.18139	yddW	putative lipoprotein YddW
b3479	-1.20037	2.59486	-8.39597	2.70413e-05	0.00015216	2.66384	nikD	Ni(2(+)) ABC transporter ATP binding subunit NikD
b0153	1.25672	6.04996	8.38111	2.73984e-05	0.00015397	1.86958	fhuB	iron(III) hydroxamate ABC transporter membrane subunit
b3752	0.444301	6.58961	8.37953	2.74367e-05	0.000153986	1.76987	rbsK	ribokinase
b0493	0.588585	6.52023	8.37642	2.75121e-05	0.00015421	1.77859	ybbO	NADP(+)-dependent aldehyde reductase
b2477	0.439478	9.34284	8.37233	2.76118e-05	0.000154569	1.51303	bamC	outer membrane protein assembly factor BamC
b0795	0.853153	3.72303	8.35816	2.79602e-05	0.000156318	2.31788	ybhG	HlyD_D23 family protein YbhG
b3871	-0.369484	11.8884	-8.32639	2.87594e-05	0.000160579	1.49322	bipA	ribosome-dependent GTPase%2C ribosome assembly factor
b3833	0.455133	7.65745	8.31013	2.91781e-05	0.000162708	1.56297	ubiE	bifunctional 2-octaprenyl-6-methoxy-1%2C4-benzoquinone methylase and S-adenosylmethionine:2-DMK methyltransferase
b3068	0.965688	4.27682	8.30213	2.93867e-05	0.000163661	2.13623	mug	stationary phase mismatch/uracil DNA glycosylase
b4723	-0.449255	9.92072	-8.28241	2.99076e-05	0.000166349	1.43207	ymcF	protein YmcF
b2904	0.70843	4.63242	8.27785	3.00296e-05	0.000166814	2.028	gcvH	glycine cleavage system H protein
b2583	-0.738678	5.44152	-8.27323	3.01537e-05	0.000167289	1.86839	yfiP	conserved protein YfiP
b1915	-0.655315	5.1634	-8.26607	3.03473e-05	0.000168149	1.91261	yecF	DUF2594 domain-containing protein YecF
b1198	0.506875	6.04549	8.26094	3.04868e-05	0.000168706	1.74063	dhaM	dihydroxyacetone kinase subunit M
b3836	0.452267	7.05412	8.24091	3.10379e-05	0.000171538	1.56895	tatA	twin arginine protein translocation system - TatA protein
b2370	-0.732093	6.35486	-8.23886	3.1095e-05	0.000171583	1.6752	evgS	sensory histidine kinase EvgS
b0856	-2.25759	0.717129	-8.23779	3.1125e-05	0.000171583	2.94279	potH	putrescine ABC transporter membrane subunit PotH
b1191	0.448169	6.87304	8.23562	3.11855e-05	0.000171698	1.58774	cvrA	putative K(+):H(+) antiporter
b4290	0.33992	9.93269	8.23118	3.13099e-05	0.000171973	1.38186	fecB	ferric citrate ABC transporter periplasmic binding protein
b4480	0.600953	5.27118	8.23101	3.13146e-05	0.000171973	1.85041	hdfR	DNA-binding transcriptional dual regulator HdfR
b2149	-1.75885	2.51995	-8.22516	3.14794e-05	0.00017266	2.55631	mglA	D-galactose/methyl-galactoside ABC transporter ATP binding subunit
b3557	-0.678371	6.07271	-8.22314	3.15364e-05	0.000172754	1.70402	insJ	insertion element IS150 protein InsA
b2294	0.49875	5.79362	8.21887	3.16577e-05	0.000173073	1.7416	yfbU	UPF0304 family protein YfbU
b4219	0.778671	4.69949	8.21828	3.16743e-05	0.000173073	1.95647	msrA	methionine sulfoxide reductase A
b2761	0.81874	4.09583	8.20891	3.19421e-05	0.000174317	2.08146	cas3	CRISPR-associated endonuclease/helicase Cas3
b3529	0.430202	6.832	8.20099	3.21703e-05	0.000175342	1.55889	pdeK	putative c-di-GMP phosphodiesterase PdeK
b1828	-0.739944	4.47092	-8.18557	3.262e-05	0.00017757	1.9794	yebQ	putative transporter YebQ
b3065	-0.367891	10.8982	-8.1746	3.29437e-05	0.000179108	1.33438	rpsU	30S ribosomal subunit protein S21
b1541	-1.25434	3.53421	-8.16957	3.30937e-05	0.000179699	2.20876	ydfZ	putative selenoprotein YdfZ
b2388	0.645394	5.07836	8.16585	3.32048e-05	0.000180077	1.82423	glk	glucokinase
b4326	1.34235	1.99369	8.15874	3.34186e-05	0.000181011	2.57698	iraD	anti-adaptor protein IraD%2C inhibitor of sigma(S) proteolysis
b4466	0.662928	5.67254	8.15206	3.36211e-05	0.00018188	1.69808	yghJ	putative lipoprotein YghJ
b0970	0.334799	10.0869	8.1343	3.41654e-05	0.000184595	1.28717	yccA	modulator of FtsH protease
b2315	-0.419583	7.0954	-8.13079	3.42741e-05	0.000184953	1.45561	folC	bifunctional folylpolyglutamate synthetase/dihydrofolate synthetase
b0143	-0.331768	9.06951	-8.12863	3.43412e-05	0.000185085	1.27252	pcnB	poly(A) polymerase I
b1105	0.456226	6.68813	8.12568	3.44332e-05	0.00018535	1.50428	lpoB	outer membrane lipoprotein - activator of MrcB activity
b2586	-1.15883	2.43984	-8.12253	3.45316e-05	0.00018565	2.4359	yfiM	protein YfiM
b2620	0.429889	7.42973	8.12114	3.4575e-05	0.000185653	1.40258	smpB	SsrA-binding protein
b0481	0.578625	5.32623	8.11743	3.46916e-05	0.00018605	1.72635	ybaK	Cys-tRNA(Pro) and Cys-tRNA(Cys) deacylase
b2478	0.355936	9.03552	8.11524	3.47606e-05	0.00018619	1.25738	dapA	4-hydroxy-tetrahydrodipicolinate synthase
b0878	0.601363	5.10477	8.09982	3.52506e-05	0.000188582	1.75248	macA	ABC-type tripartite efflux pump membrane fusion protein
b1159	-0.638341	4.72966	-8.09296	3.54709e-05	0.000189527	1.82828	mcrA	e14 prophage%3B 5-methylcytosine-specific restriction enzyme McrA
b1133	-0.353998	8.50216	-8.06763	3.62979e-05	0.000193648	1.23534	mnmA	tRNA-specific 2-thiouridylase
b3160	0.517493	5.45299	8.06662	3.63313e-05	0.000193648	1.6506	yhbW	putative luciferase-like monooxygenase
b4025	0.41718	8.52633	8.06232	3.64739e-05	0.00019417	1.22551	pgi	glucose-6-phosphate isomerase
b0564	-1.32108	2.58484	-8.03452	3.74114e-05	0.000198917	2.321	appY	DNA-binding transcriptional activator AppY
b3802	0.408598	7.8108	8.03297	3.74647e-05	0.000198957	1.26801	hemY	protein HemY
b3828	0.887526	3.22534	8.01986	3.79169e-05	0.000201054	2.10818	metR	DNA-binding transcriptional dual regulator MetR
b4410	-0.609844	5.85997	-8.01884	3.79521e-05	0.000201054	1.53459	ecnA	entericidin A lipoprotein%2C antidote to entericidin B
b4202	-0.339576	11.548	-8.00745	3.83502e-05	0.000202915	1.17123	rpsR	30S ribosomal subunit protein S18
b3753	0.575951	4.96417	8.00471	3.84466e-05	0.000203178	1.68484	rbsR	DNA-binding transcriptional dual regulator RbsR
b1413	0.350005	8.03982	7.9881	3.90373e-05	0.000205839	1.19598	hrpA	ATP-dependent RNA helicase HrpA
b0791	0.570049	5.26975	7.98788	3.9045e-05	0.000205839	1.60674	ybhQ	putative inner membrane protein
b2810	-0.40387	7.30676	-7.98567	3.91244e-05	0.000205958	1.28222	csdA	cysteine sulfinate desulfinase
b2286	-0.36421	7.69469	-7.98462	3.91624e-05	0.000205958	1.23369	nuoC	NADH:quinone oxidoreductase subunit CD
b3651	-0.441862	6.99244	-7.97492	3.95129e-05	0.00020755	1.31216	trmH	tRNA (Gm18) 2'-O-methyltransferase
b1480	1.13984	2.95237	7.96857	3.97446e-05	0.000208288	2.13621	sra	30S ribosomal subunit protein S22
b1805	-0.451463	7.28651	-7.96835	3.97524e-05	0.000208288	1.26748	fadD	fatty acyl-CoA synthetase
b1439	-0.494933	5.94655	-7.96713	3.97972e-05	0.000208288	1.46553	ydcR	fused putative DNA-binding transcriptional regulator/putative aminotransferase YdcR
b4722	3.23572	-0.693792	7.96436	3.98986e-05	0.000208568	2.74282	idlP	iraD leader peptide
b2293	0.507498	5.93832	7.95295	4.03203e-05	0.000210518	1.44982	hxpA	hexitol phosphatase A
b3995	0.438221	6.29916	7.94797	4.05058e-05	0.000211233	1.38462	rsd	regulator of sigma D
b2509	-0.419124	7.69523	-7.93039	4.11686e-05	0.000214432	1.17865	xseA	exodeoxyribonuclease VII subunit XseA
b3670	1.44261	1.84246	7.91965	4.1579e-05	0.000216123	2.38412	ilvN	acetohydroxy acid synthase I subunit IlvN
b1871	-0.561364	6.59043	-7.91731	4.16692e-05	0.000216123	1.31258	cmoB	tRNA U34 carboxymethyltransferase
b2893	0.448116	7.15379	7.9172	4.16736e-05	0.000216123	1.23022	dsbC	protein disulfide isomerase DsbC
b4055	0.595513	4.77304	7.91671	4.16922e-05	0.000216123	1.6352	aphA	acid phosphatase/phosphotransferase
b3289	-0.424326	8.05694	-7.91237	4.18599e-05	0.000216734	1.11945	rsmB	16S rRNA m(5)C967 methyltransferase
b1597	-0.7562	3.78464	-7.90268	4.22375e-05	0.000218297	1.85632	asr	acid shock protein
b1112	0.468448	6.42922	7.90204	4.22624e-05	0.000218297	1.31709	bhsA	DUF1471 domain-containing multiple stress resistance outer membrane protein BhsA
b3186	-0.347089	11.1183	-7.89436	4.25641e-05	0.000219594	1.05244	rplU	50S ribosomal subunit protein L21
b1095	-0.361642	10.8462	-7.88966	4.275e-05	0.000220292	1.04564	fabF	beta-ketoacyl-[acyl carrier protein] synthase II
b2818	-0.726416	3.95602	-7.88156	4.30729e-05	0.000221693	1.79233	argA	N-acetylglutamate synthase
b0110	0.598931	5.2781	7.85816	4.40197e-05	0.000226298	1.47319	ampD	1%2C6-anhydro-N-acetylmuramoyl-L-alanine amidase
b3549	0.601168	5.03087	7.85622	4.40992e-05	0.000226438	1.52038	tag	3-methyl-adenine DNA glycosylase I%2C constitutive
b1121	-0.930081	3.47081	-7.854	4.41906e-05	0.00022664	1.89063	ycfZ	putative inner membrane protein
b2901	0.479225	6.45277	7.84191	4.46909e-05	0.000228936	1.25183	bglA	6-phospho-beta-glucosidase A
b1090	-0.464024	9.64399	-7.8368	4.49043e-05	0.000229758	0.978621	plsX	putative phosphate acyltransferase
b1666	-0.711824	4.20578	-7.82782	4.52818e-05	0.000231417	1.67775	valW	tRNA-Val
b0455	-1.10618	3.4706	-7.81298	4.59142e-05	0.000234373	1.85718	ffs	signal recognition particle 4.5S RNA
b2169	0.363869	7.46325	7.79717	4.65983e-05	0.000237586	1.0683	fruB	fructose-specific PTS multiphosphoryl transfer protein FruB
b2811	-0.468022	5.81842	-7.79513	4.66871e-05	0.00023776	1.31095	csdE	sulfur acceptor protein CsdE
b3885	0.515366	5.47273	7.79262	4.6797e-05	0.000237782	1.36751	yihX	alpha-D-glucose-1-phosphate phosphatase
b2307	-1.21352	3.42199	-7.79253	4.68009e-05	0.000237782	1.85395	hisM	lysine/arginine/ornithine ABC transporter/histidine ABC transporter%2C membrane subunit HisM
b2378	0.359909	8.91647	7.77698	4.74883e-05	0.000240992	0.91427	lpxP	palmitoleoyl acyltransferase
b1477	0.471372	5.91781	7.77122	4.77458e-05	0.000242016	1.26636	yddM	putative DNA-binding transcriptional regulator YddM
b1821	-0.996218	3.51965	-7.76651	4.79571e-05	0.000242804	1.79241	mntP	Mn(2(+)) exporter
b3848	0.477873	6.6922	7.74729	4.88316e-05	0.000246944	1.11774	yigZ	IMPACT family member YigZ
b3973	-0.417526	6.49964	-7.745	4.89369e-05	0.000247188	1.14661	birA	DNA-binding transcriptional repressor/biotin-[acetyl-CoA-carboxylase] ligase BirA
b0947	0.409423	6.70945	7.74176	4.90864e-05	0.000247418	1.10896	ycbX	6-N-hydroxylaminopurine resistance protein
b4371	-0.378207	7.77267	-7.74155	4.90963e-05	0.000247418	0.974635	rsmC	16S rRNA m(2)G1207 methyltransferase
b1126	-0.41812	8.44655	-7.73474	4.94118e-05	0.000248719	0.899316	potA	spermidine preferential ABC transporter ATP binding subunit
b1106	0.45122	5.97776	7.71568	5.03083e-05	0.000252686	1.1984	thiK	thiamine kinase
b4254	-2.79806	1.72546	-7.71551	5.03161e-05	0.000252686	2.3157	argI	ornithine carbamoyltransferase ArgI
b0893	0.319296	9.98785	7.68397	5.18394e-05	0.000260035	0.824689	serS	serine--tRNA ligase
b2436	0.41722	6.63571	7.68027	5.20212e-05	0.000260646	1.05563	hemF	coproporphyrinogen III oxidase
b2501	0.412657	7.52048	7.67623	5.22208e-05	0.000261344	0.93557	ppk	polyphosphate kinase
b2822	0.354061	7.97407	7.66872	5.25943e-05	0.000262911	0.87375	recC	exodeoxyribonuclease V subunit RecC
b3389	-0.325065	9.92001	-7.66063	5.29992e-05	0.00026463	0.799103	aroB	3-dehydroquinate synthase
b3741	-0.401309	9.24537	-7.6552	5.32735e-05	0.000265695	0.786353	mnmG	5-carboxymethylaminomethyluridine-tRNA synthase subunit MnmG
b3820	-0.864988	4.30068	-7.63976	5.40611e-05	0.000269314	1.46604	yigI	putative thioesterase YigI
b4129	0.418172	7.81211	7.6238	5.48888e-05	0.000273123	0.845581	lysU	lysine--tRNA ligase/Ap4A synthetase/Ap3A synthetase
b0313	0.518371	6.17057	7.616	5.52982e-05	0.000274846	1.06232	betI	DNA-binding transcriptional repressor BetI
b1686	0.662133	4.10103	7.61075	5.5576e-05	0.000275731	1.46747	menI	1%2C4-dihydroxy-2-naphthoyl-CoA hydrolase
b0312	0.37436	7.08794	7.61023	5.56033e-05	0.000275731	0.919652	betB	betaine aldehyde dehydrogenase
b0460	0.513347	8.69589	7.59846	5.62319e-05	0.000278531	0.73707	hha	hemolysin expression modulating protein
b0273	-1.00639	3.71267	-7.57808	5.73388e-05	0.00028369	1.54844	argF	CP4-6 prophage%3B ornithine carbamoyltransferase ArgF
b1059	0.453844	6.21776	7.5736	5.75851e-05	0.000284584	1.0094	solA	N-methyl-L-tryptophan oxidase
b3236	-0.364599	7.86086	-7.56777	5.79078e-05	0.000285854	0.781983	mdh	malate dehydrogenase
b3092	0.880496	4.37027	7.54388	5.92501e-05	0.000292148	1.34066	uxaC	D-glucoronate/D-galacturonate isomerase
b2008	-0.738642	4.55863	-7.54261	5.93225e-05	0.000292173	1.30133	yeeA	putative transporter YeeA
b2666	1.02686	3.6552	7.53181	5.99421e-05	0.00029489	1.5036	yqaE	Pmp3 family protein
b1201	0.496947	5.71151	7.51628	6.08446e-05	0.00029867	1.0346	dhaR	DNA-binding transcriptional dual regulator DhaR
b1668	-0.628307	4.59331	-7.51623	6.08478e-05	0.00029867	1.26294	ydhS	FAD/NAD(P) binding domain-containing protein YdhS
b3185	-0.321929	11.1485	-7.51164	6.11175e-05	0.000299655	0.652647	rpmA	50S ribosomal subunit protein L27
b0652	-0.467215	5.64942	-7.50554	6.14781e-05	0.000301083	1.03747	gltL	glutamate/aspartate ABC transporter ATP binding subunit
b2287	-0.424527	6.9961	-7.4952	6.20943e-05	0.000303759	0.812029	nuoB	NADH:quinone oxidoreductase subunit B
b2916	0.445062	6.62019	7.48098	6.29537e-05	0.000307616	0.847541	argP	DNA-binding transcriptional dual regulator ArgP
b3809	0.455748	7.3653	7.47886	6.30826e-05	0.0003079	0.745894	dapF	diaminopimelate epimerase
b3926	-0.441073	6.31712	-7.47563	6.328e-05	0.000308517	0.89175	glpK	glycerol kinase
b2797	0.393908	7.9101	7.46924	6.36729e-05	0.000310084	0.669927	sdaB	L-serine deaminase II
b2524	0.3722	7.0724	7.45812	6.43623e-05	0.000313091	0.76009	iscX	accessory iron-sulfur cluster assembly protein IscX
b0489	0.549537	5.11946	7.45241	6.47193e-05	0.000314475	1.07897	qmcA	PHB domain-containing protein
b0029	0.360097	7.8333	7.44336	6.52906e-05	0.000316896	0.651197	ispH	1-hydroxy-2-methyl-2-(E)-butenyl 4-diphosphate reductase
b1528	-0.607994	5.15324	-7.44162	6.54004e-05	0.000317075	1.06681	ydeA	L-arabinose exporter
b3150	0.4263	6.58647	7.43971	6.55218e-05	0.00031731	0.808312	yraP	divisome-associated lipoprotein YraP
b1626	-0.445113	5.81695	-7.43415	6.58772e-05	0.000318675	0.93103	ydgK	conserved inner membrane protein YdgK
b2844	-0.560015	4.90724	-7.43025	6.61269e-05	0.000319527	1.10316	yqeF	putative acyltransferase
b3283	0.406797	7.24146	7.41288	6.72543e-05	0.000324614	0.690283	yrdD	putative DNA topoisomerase
b3169	-0.375591	11.1537	-7.41166	6.73342e-05	0.000324639	0.545674	nusA	transcription termination/antitermination protein NusA
b1199	0.626714	4.56648	7.40837	6.75505e-05	0.000325321	1.14801	dhaL	dihydroxyacetone kinase subunit L
b1807	-0.418609	6.48003	-7.39088	6.87122e-05	0.000330549	0.774957	tsaB	N(6)-L-threonylcarbamoyladenine synthase%2C TsaB subunit
b0314	0.379277	7.41462	7.38663	6.89979e-05	0.000331556	0.640607	betT	choline:H(+) symporter
b3888	0.633892	6.27219	7.38493	6.91122e-05	0.000331739	0.800564	yiiD	putative acetyltransferase YiiD
b1104	0.594973	6.17753	7.37408	6.98487e-05	0.000334904	0.80398	ycfL	DUF1425 domain-containing protein YcfL
b0130	-0.475848	5.53105	-7.36912	7.0189e-05	0.000336164	0.913463	yadE	putative polysaccharide deacetylase lipoprotein
b0023	-0.406931	10.9288	-7.36311	7.06024e-05	0.000337772	0.491666	rpsT	30S ribosomal subunit protein S20
b3618	-0.517491	6.33751	-7.33756	7.23931e-05	0.000345958	0.741123	htrL	protein HtrL
b3550	0.64723	4.18253	7.33632	7.24811e-05	0.000345998	1.15649	yiaC	putative acyltransferase with acyl-CoA N-acyltransferase domain
b3750	0.433686	5.93076	7.33307	7.27129e-05	0.000346352	0.799869	rbsC	ribose ABC transporter membrane subunit
b2352	-0.495112	7.0091	-7.33304	7.27148e-05	0.000346352	0.636774	yfdI	CPS-53 (KpLE1) prophage%3B serotype specific glucosyl transferase
b3082	-0.647328	4.04086	-7.32979	7.29476e-05	0.00034708	1.19039	higA	antitoxin/DNA-binding transcriptional repressor HigA
b3157	0.446858	6.14636	7.30854	7.44877e-05	0.00035402	0.737224	yhbT	SCP2 domain-containing protein YhbT
b2040	-0.47434	7.55591	-7.29401	7.55614e-05	0.000358731	0.524655	rfbD	dTDP-4-dehydrorhamnose reductase
b2229	-1.29799	1.82676	-7.28914	7.59253e-05	0.000360065	1.74922	yfaT	DUF1175 domain-containing protein YfaT
b3337	1.04101	2.92244	7.27959	7.66442e-05	0.000363078	1.4225	bfd	bacterioferritin-associated ferredoxin
b0857	-1.25275	2.31109	-7.26805	7.75236e-05	0.000366844	1.59801	potI	putrescine ABC transporter membrane subunit PotI
b1655	-0.841201	3.13421	-7.26213	7.79785e-05	0.000368595	1.35152	mepH	peptidoglycan DD-endopeptidase MepH
b2582	-0.462421	6.00855	-7.25419	7.85934e-05	0.000371098	0.703657	trxC	reduced thioredoxin 2
b0060	0.602636	6.51086	7.25105	7.88381e-05	0.000371849	0.61733	polB	DNA polymerase II
b0189	0.515253	5.52212	7.24692	7.91613e-05	0.000372968	0.778755	rof	modulator of Rho-dependent transcription termination
b2332	0.465728	5.47991	7.24062	7.96575e-05	0.000374899	0.779212	yfcO	DUF2544 domain-containing protein YfcO
b0096	0.328025	11.2928	7.23521	8.00861e-05	0.000376509	0.355108	lpxC	UDP-3-O-acyl-N-acetylglucosamine deacetylase
b2312	-0.40726	6.16585	-7.23112	8.04118e-05	0.000377631	0.651632	purF	amidophosphoribosyltransferase
b2086	0.780253	3.38274	7.2279	8.06685e-05	0.000378428	1.23888	yegS	lipid kinase
b3364	-0.411003	6.60895	-7.22185	8.11553e-05	0.000380301	0.571765	tsgA	putative transporter TsgA
b0605	-0.370841	12.3481	-7.2185	8.14255e-05	0.000381155	0.348469	ahpC	alkyl hydroperoxide reductase%2C AhpC component
b4324	0.460471	6.01243	7.21698	8.1549e-05	0.000381323	0.65977	uxuR	DNA-binding transcriptional repressor UxuR
b2766	-0.580796	5.60159	-7.20714	8.23503e-05	0.000384656	0.726273	ygcN	putative oxidoreductase with FAD/NAD(P)-binding domain
b3425	-0.530147	5.74262	-7.19446	8.3397e-05	0.000389126	0.685686	glpE	thiosulfate sulfurtransferase GlpE
b2967	-1.42637	1.54501	-7.17958	8.46434e-05	0.000394518	1.70908	pheV	tRNA-Phe
b3774	0.549978	4.8079	7.17237	8.52548e-05	0.000396942	0.839699	ilvC	ketol-acid reductoisomerase (NADP(+))
b4214	0.557136	4.98303	7.16358	8.60061e-05	0.000400011	0.793847	cysQ	3'(2')%2C5'-bisphosphate nucleotidase
b0240	0.369381	7.72514	7.15986	8.63265e-05	0.00040073	0.355742	crl	RNA polymerase holoenzyme assembly factor Crl
b2836	0.356751	7.40262	7.15965	8.63451e-05	0.00040073	0.394493	aas	acyltransferase
b1162	-0.358624	7.65493	-7.13573	8.84375e-05	0.000410003	0.338502	bluR	DNA-binding transcriptional repressor BluR
b0074	0.603918	4.68984	7.12689	8.92254e-05	0.000413215	0.815164	leuA	2-isopropylmalate synthase
b3806	0.29955	9.42293	7.12024	8.98229e-05	0.000415539	0.20933	cyaA	adenylate cyclase
b0005	0.584247	4.61818	7.11465	9.03286e-05	0.000417434	0.81678	yaaX	DUF2502 domain-containing protein YaaX
b3182	0.373919	7.09825	7.10746	9.0984e-05	0.000420015	0.374811	dacB	peptidoglycan DD-endopeptidase DacB
b4159	0.309808	8.16284	7.07867	9.36601e-05	0.000431703	0.215609	mscM	miniconductance mechanosensitive channel MscM
b2041	-0.51467	7.90538	-7.07809	9.37146e-05	0.000431703	0.246638	rfbB	dTDP-glucose 4%2C6-dehydratase 1
b2417	0.297778	9.30483	7.05991	9.5451e-05	0.000439236	0.140907	crr	Enzyme IIA(Glc)
b3258	-0.631508	6.45753	-7.05859	9.55776e-05	0.000439354	0.417837	panF	pantothenate:Na(+) symporter
b0796	0.657725	4.31434	7.04532	9.68692e-05	0.00044482	0.807905	cecR	DNA-binding transcriptional dual regulator CecR
b3863	0.301767	8.24703	7.04247	9.71488e-05	0.000445633	0.166566	polA	DNA polymerase I
b4133	-0.563977	4.81369	-7.03844	9.7546e-05	0.000446983	0.695141	cadC	DNA-binding transcriptional activator CadC
b2963	0.366704	6.67294	7.03281	9.81044e-05	0.000449068	0.349822	mltC	membrane-bound lytic murein transglycosylase C
b0111	0.54202	5.58853	7.0309	9.82946e-05	0.000449465	0.528646	ampE	protein AmpE
b0643	0.70769	3.76646	7.02961	9.84227e-05	0.000449578	0.921982	ybeL	DUF1451 domain-containing protein YbeL
b2212	-0.845578	3.58284	-7.01063	0.000100337	0.000457794	0.96077	alkB	DNA oxidative demethylase
b1705	0.634663	3.99181	7.0097	0.000100432	0.000457794	0.842867	ydiE	PF10636 family protein YdiE
b0355	0.490904	6.36152	6.9996	0.000101469	0.000462034	0.361584	frmB	S-formylglutathione hydrolase FrmB
b0887	0.408877	6.23849	6.9983	0.000101603	0.00046216	0.379632	cydD	glutathione/L-cysteine ABC exporter subunit CydD
b4640	-0.68914	3.81202	-6.99597	0.000101844	0.000462681	0.881466
b0912	-0.324824	8.04771	-6.99513	0.00010193	0.000462681	0.136543	ihfB	integration host factor subunit beta
b0557	-0.604027	4.12913	-6.99025	0.000102438	0.000464501	0.79537	borD	DLP12 prophage%3B prophage lipoprotein BorD
b3937	-0.500388	5.45293	-6.98887	0.000102583	0.000464671	0.510695	yiiX	putative lipid binding hydrolase
b2791	-0.476995	5.32954	-6.985	0.000102988	0.00046602	0.529645	truC	tRNA pseudouridine(65) synthase
b3430	0.502329	5.01041	6.98278	0.00010322	0.000466585	0.586914	glgC	glucose-1-phosphate adenylyltransferase
b0630	0.609163	6.15961	6.97401	0.000104148	0.000470288	0.366777	lipB	lipoyl(octanoyl) transferase
b1296	-0.94134	3.29892	-6.97116	0.000104451	0.000471167	0.993071	puuP	putrescine:H(+) symporter PuuP
b4606	1.43698	2.06033	6.95775	0.00010589	0.000477164	1.32141	ypfM	uncharacterized protein YpfM
b0963	0.451605	5.62212	6.94762	0.000106992	0.000481632	0.428211	mgsA	methylglyoxal synthase
b2329	0.331428	7.73548	6.943	0.000107499	0.000483413	0.112511	aroC	chorismate synthase
b1303	0.543903	4.80686	6.9413	0.000107687	0.000483755	0.583017	pspF	DNA-binding transcriptional dual regulator PspF
b0453	0.593632	5.33387	6.9321	0.000108705	0.000487825	0.466377	ybaY	PF09619 family lipoprotein YbaY
b2168	0.352955	6.9966	6.93054	0.000108879	0.000488101	0.190042	fruK	1-phosphofructokinase
b3480	-0.908428	2.7734	-6.92734	0.000109237	0.0004892	1.08248	nikE	Ni(2(+)) ABC transporter ATP binding subunit NikE
b1545	-0.578607	4.44183	-6.92246	0.000109784	0.000491146	0.646438	pinQ	Qin prophage%3B putative site-specific recombinase
b1051	-0.780864	3.18127	-6.9179	0.0001103	0.000492945	0.958064	msyB	acidic protein that suppresses heat sensitivity of a secY mutant
b0098	0.377594	11.2118	6.89617	0.000112788	0.000503548	-0.0232562	secA	protein translocation ATPase
b1185	-0.396598	6.76868	-6.88938	0.000113579	0.000506558	0.177498	dsbB	protein thiol:quinone oxidoreductase DsbB
b3040	0.35861	6.65268	6.87685	0.000115055	0.000512612	0.177093	zupT	heavy metal divalent cation transporter ZupT
b1660	0.635677	5.5797	6.86546	0.000116413	0.000518134	0.345202	ydhC	putative transporter YdhC
b0956	0.482796	5.2071	6.86286	0.000116726	0.000518996	0.411593	matP	macrodomain Ter protein
b0859	-0.52235	5.76392	-6.85159	0.000118092	0.000524533	0.298527	rlmC	23S rRNA m(5)U747 methyltransferase
b4146	-0.346539	7.63798	-6.8417	0.000119306	0.00052938	0.0103606	epmB	lysine 2%2C3-aminomutase
b1556	-0.844799	2.89587	-6.8342	0.000120236	0.000532963	0.942544	essQ	Qin prophage%3B putative S lysis protein
b0755	0.399454	8.56623	6.82493	0.000121395	0.000537555	-0.105714	gpmA	2%2C3-bisphosphoglycerate-dependent phosphoglycerate mutase
b3861	-0.641144	5.19077	-6.81916	0.000122123	0.000539923	0.372929	yihF	uncharacterized protein YihF
b3703	-0.337096	9.67824	-6.81872	0.000122179	0.000539923	-0.1263	rpmH	50S ribosomal subunit protein L34
b0544	-1.10826	2.09383	-6.80751	0.000123609	0.000545687	1.1428	ybcK	DLP12 prophage%3B putative recombinase
b3558	-0.637216	5.79533	-6.80076	0.000124478	0.000548969	0.237147	insK	IS150 conserved protein InsB
b0449	-0.4135	6.69135	-6.7952	0.000125199	0.000551585	0.0816194	mdlB	ABC transporter family protein MdlB
b3761	-1.22587	2.98041	-6.78985	0.000125897	0.000554101	0.888254	trpT	tRNA-Trp
b1835	-0.643839	5.93827	-6.78872	0.000126046	0.000554193	0.198162	rsmF	16S rRNA m(5)C1407 methyltransferase
b1235	0.416176	6.32018	6.78702	0.000126269	0.000554614	0.126971	rssB	regulator of RpoS
b1145	0.43525	5.75814	6.78143	0.000127006	0.000557287	0.215282	ymfK	e14 prophage%3B putative repressor protein YmfK
b1064	0.530768	4.71385	6.78034	0.00012715	0.000557354	0.419918	grxB	reduced glutaredoxin 2
b2505	-0.812424	3.24926	-6.77747	0.000127531	0.000558462	0.782525	yfgH	lipoprotein YfgH
b2249	0.342532	6.84509	6.76997	0.000128531	0.000562273	0.0275912	yfaY	IPR008135 CinA family protein YfaY
b3607	0.322487	7.64424	6.75814	0.000130127	0.000567901	-0.0869863	cysE	serine acetyltransferase
b3939	0.416302	5.78876	6.7577	0.000130186	0.000567901	0.182588	metB	O-succinylhomoserine(thiol)-lyase/O-succinylhomoserine lyase
b4113	0.518955	4.65915	6.75753	0.000130209	0.000567901	0.405336	basR	DNA-binding transcriptional dual regulator BasR
b1804	-0.308154	7.72575	-6.74986	0.000131256	0.000571891	-0.10546	rnd	RNase D
b3791	-0.388448	6.78955	-6.74468	0.000131968	0.000574418	0.00909946	wecE	dTDP-4-dehydro-6-deoxy-D-glucose transaminase
b4739	-1.82568	1.14963	-6.73421	0.000133421	0.000580163	1.33491	ymgL	protein YmgL
b2821	0.387545	7.17979	6.73315	0.00013357	0.000580227	-0.0586789	ptrA	protease 3
b0821	-0.634155	4.52227	-6.72884	0.000134174	0.000581887	0.409672	ybiU	DUF1479 domain-containing protein YbiU
b2511	-0.289917	9.28725	-6.72851	0.00013422	0.000581887	-0.23435	der	50S ribosomal subunit stability factor
b3886	0.531479	5.2954	6.72607	0.000134563	0.000582757	0.238138	yihY	putative inner membrane protein
b4703	-0.6839	4.07284	-6.72518	0.000134689	0.000582757	0.510851	pmrR	putative bitopic inner membrane protein
b3461	0.301799	10.8828	6.71673	0.000135886	0.000586775	-0.230934	rpoH	RNA polymerase%2C sigma 32 (sigma H) factor
b2410	0.493153	4.95992	6.71672	0.000135888	0.000586775	0.294873	yfeH	putative solute:Na(+) symporter
b2353	-0.802549	3.35068	-6.71462	0.000136188	0.000587487	0.684569
b4568	0.661494	3.65049	6.70344	0.000137794	0.000593828	0.581457	ytjA	DUF1328 domain-containing protein YtjA
b2435	0.334187	6.94302	6.70127	0.000138109	0.000594595	-0.0647761	amiA	N-acetylmuramoyl-L-alanine amidase A
b2784	0.400835	6.92133	6.69901	0.000138437	0.000595417	-0.0642313	relA	GDP/GTP pyrophosphokinase
b2328	0.360506	6.68891	6.68264	0.00014084	0.000605051	-0.050803	mepA	peptidoglycan DD-endopeptidase/peptidoglycan LD-endopeptidase
b2313	-0.440921	5.70999	-6.68186	0.000140956	0.000605051	0.112325	cvpA	colicin V production protein
b3056	0.357699	8.18641	6.67717	0.000141653	0.000607446	-0.242666	cca	fused tRNA nucleotidyltransferase/2'%2C3'-cyclic phosphodiesterase/2' nucleotidase and phosphatase
b0403	-0.643649	4.99118	-6.67109	0.000142563	0.000610745	0.242806	malZ	maltodextrin glucosidase
b3203	0.456293	7.20232	6.66867	0.000142927	0.000611701	-0.135767	hpf	ribosome hibernation-promoting factor
b3414	0.294941	8.14353	6.6611	0.000144072	0.000615992	-0.257137	nfuA	iron-sulfur cluster carrier protein NfuA
b2320	0.351981	6.73969	6.65744	0.000144629	0.00061748	-0.0873433	pdxB	erythronate-4-phosphate dehydrogenase
b0216	-0.864623	2.84766	-6.65695	0.000144704	0.00061748	0.75424	aspV	tRNA-Asp
b1262	0.498377	5.45347	6.64886	0.000145945	0.000622165	0.118231	trpC	fused indole-3-glycerol phosphate synthase/phosphoribosylanthranilate isomerase
b2962	0.433301	5.71977	6.64542	0.000146476	0.000623815	0.0650962	yggX	putative Fe(2(+))-trafficking protein
b0623	0.347193	11.3432	6.642	0.000147008	0.000625466	-0.31424	cspE	transcription antiterminator and regulator of RNA stability
b1638	-0.419692	5.75993	-6.62524	0.000149637	0.00063603	0.037233	pdxH	pyridoxal 5-phosphate synthase
b4390	0.398334	6.50488	6.62414	0.00014981	0.000636145	-0.0906916	nadR	DNA-binding transcriptional repressor/NMN adenylyltransferase NadR
b0948	-0.30581	8.30393	-6.60915	0.00015221	0.000645704	-0.331598	rlmL	fused 23S rRNA m(2)G2445 methyltransferase and 23S rRNA m(7)G2069 methyltransferase
b0607	0.406799	6.06892	6.59471	0.000154562	0.00065504	-0.0540064	uspG	universal stress protein G
b0634	-0.324365	7.5954	-6.58358	0.0001564	0.000662004	-0.282792	mrdB	SEDS family protein MrdB
b1056	0.531956	5.54033	6.58286	0.000156519	0.000662004	0.025457	yceI	protein YceI
b1441	-1.35227	1.92216	-6.58201	0.000156662	0.000662004	0.948141	ydcT	putative ABC transporter ATP-binding protein YdcT
b1552	0.352324	7.90654	6.55431	0.000161353	0.000681165	-0.355142	cspI	Qin prophage%3B cold shock protein CspI
b0891	0.525723	7.36411	6.52962	0.000165667	0.000698695	-0.318088	lolA	outer membrane lipoprotein carrier protein
b1453	0.466713	5.21202	6.52832	0.000165897	0.000698988	0.0241006	ansP	L-asparagine transporter
b3978	-0.293071	8.17569	-6.52523	0.000166446	0.000700623	-0.41756	glyT	tRNA-Gly
b0850	0.763901	4.02508	6.52305	0.000166835	0.000701579	0.281854	ybjC	DUF1418 domain-containing protein YbjC
b3822	-0.338354	7.16988	-6.50838	0.000169479	0.000712007	-0.318244	recQ	ATP-dependent DNA helicase RecQ
b3083	-0.976072	3.52589	-6.49837	0.00017131	0.000719005	0.395624	higB	ribosome-dependent mRNA interferase toxin HigB
b3887	0.651142	5.42551	6.49739	0.000171489	0.00071906	-0.0516967	dtd	D-aminoacyl-tRNA deacylase
b3748	1.03729	6.46508	6.48725	0.000173369	0.000726242	-0.23679	rbsD	D-ribose pyranase
b3386	-0.36621	6.72027	-6.48304	0.000174153	0.000728827	-0.286309	rpe	ribulose-phosphate 3-epimerase
b0032	-0.580715	4.87737	-6.48105	0.000174527	0.000729251	0.0430674	carA	carbamoyl phosphate synthetase subunit alpha
b3408	0.732821	3.12897	6.48071	0.00017459	0.000729251	0.459727	feoA	ferrous iron transport protein A
b0608	-0.59826	3.95525	-6.47949	0.00017482	0.00072951	0.25112	ybdR	putative Zn(2(+))-dependent alcohol dehydrogenase YbdR
b3105	0.964181	5.70544	6.47588	0.000175502	0.000731649	-0.123162	yhaJ	DNA-binding transcriptional activator YhaJ
b4490	-0.610465	4.49289	-6.47191	0.000176253	0.000734078	0.116152	efeU	inactive ferrous iron permease EfeU%2C N-terminal fragment
b2039	-0.486173	7.4067	-6.46607	0.000177364	0.000737999	-0.397127	rfbA	dTDP-glucose pyrophosphorylase
b1062	-0.398608	6.17591	-6.46439	0.000177685	0.000738626	-0.222933	pyrC	dihydroorotase
b4425	-0.775215	5.78973	-6.46074	0.000178385	0.000740802	-0.154704	rttR	small RNA RttR
b0054	0.29668	9.91556	6.45989	0.00017855	0.000740802	-0.540542	lptD	lipopolysaccharide assembly protein LptD
b0758	0.391182	5.89323	6.4522	0.000180037	0.000746261	-0.19201	galT	galactose-1-phosphate uridylyltransferase
b0368	1.22861	1.60398	6.4471	0.00018103	0.000749659	0.85383	tauD	taurine dioxygenase
b0357	0.577558	5.72737	6.44471	0.000181498	0.000750882	-0.170474	frmR	DNA-binding transcriptional repressor FrmR
b3870	0.340637	10.3406	6.43694	0.000183028	0.000756494	-0.563049	glnA	glutamine synthetase
b0145	0.297088	8.46157	6.42471	0.000185465	0.000765836	-0.565395	dksA	RNA polymerase-binding transcription factor DksA
b0365	2.15745	0.0806013	6.42285	0.000185838	0.00076665	1.17188	tauA	taurine ABC transporter periplasmic binding protein
b1025	-0.671783	3.41648	-6.4199	0.000186433	0.000768375	0.319255	dgcT	putative diguanylate cyclase DgcT
b3787	-0.297084	8.04711	-6.41593	0.000187236	0.000770953	-0.533366	wecC	UDP-N-acetyl-D-mannosamine dehydrogenase
b3204	0.313403	7.33298	6.41347	0.000187736	0.000771371	-0.452523	ptsN	phosphotransferase system enzyme IIA(Ntr)
b2316	-0.271478	9.05731	-6.41318	0.000187795	0.000771371	-0.603441	accD	acetyl-CoA carboxyltransferase subunit beta
b1555	-0.821427	2.84887	-6.41281	0.000187871	0.000771371	0.468036	ydfR	Qin prophage%3B protein YdfR
b3789	-0.314262	7.36406	-6.41009	0.000188425	0.000772914	-0.459423	rffH	dTDP-glucose pyrophosphorylase 2
b1610	0.669888	4.51554	6.39721	0.000191076	0.000783051	0.0176576	tus	DNA replication terminus site-binding protein
b4670	-1.42337	1.21868	-6.39505	0.000191525	0.000784151	0.913738	yjeV	uncharacterized protein YjeV
b4220	0.408212	5.61364	6.37769	0.000195173	0.000798337	-0.231562	tamA	translocation and assembly module subunit TamA
b4197	0.701231	3.19869	6.37513	0.000195717	0.000799808	0.315787	ulaE	L-ribulose-5-phosphate 3-epimerase UlaE
b1591	0.503181	5.71953	6.36848	0.00019714	0.000804638	-0.26066	dmsD	redox enzyme maturation protein DmsD
b3790	-0.340506	6.52401	-6.36787	0.00019727	0.000804638	-0.394151	rffC	dTDP-4-amino-4%2C6-dideoxy-D-galactose acyltransferase
b0033	-0.389317	6.536	-6.34722	0.000201761	0.000822186	-0.420116	carB	carbamoyl phosphate synthetase subunit beta
b0990	-0.336976	11.7024	-6.34112	0.00020311	0.000826909	-0.666698	cspG	cold shock protein CspG
b3830	0.992789	3.07684	6.33724	0.000203972	0.000829637	0.312342	ysgA	putative dienelactone hydrolase
b1108	0.376828	6.04463	6.32688	0.000206296	0.000838306	-0.367334	ycfP	UPF0227 protein YcfP
b2780	-0.320434	9.85632	-6.31771	0.000208377	0.000845972	-0.711494	pyrG	CTP synthetase
b0408	0.260618	10.113	6.31312	0.000209427	0.000849315	-0.713504	secD	Sec translocon accessory complex subunit SecD
b4051	0.628235	4.64711	6.3124	0.000209592	0.000849315	-0.112946	qorA	putative quinone oxidoreductase 1
b0097	0.292569	8.145	6.30848	0.000210494	0.000852178	-0.674465	secM	SecA translation regulator
b2683	0.424821	5.57345	6.3061	0.000211045	0.000853611	-0.30993	ygaH	L-valine exporter subunit YgaH
b3054	0.465848	5.17808	6.29862	0.000212784	0.000859845	-0.242433	ygiF	inorganic triphosphatase
b3475	-0.350965	6.32054	-6.29553	0.000213507	0.000861965	-0.448851	acpT	holo-[acyl carrier protein] synthase 2
b4446	-0.55204	4.08248	-6.29308	0.000214081	0.000863387	-0.00307787	sibC	small RNA SibC
b3677	0.615287	3.78692	6.29233	0.000214257	0.000863387	0.0629064	yidI	putative inner membrane protein
b1767	-0.346135	6.8322	-6.29007	0.00021479	0.000864733	-0.53328	ansA	L-asparaginase 1
b2964	-0.403228	5.67326	-6.28721	0.000215467	0.000866417	-0.347831	nupG	nucleoside:H(+) symporter NupG
b0653	-0.458997	4.98156	-6.28662	0.000215607	0.000866417	-0.212897	gltK	glutamate/aspartate ABC transporter membrane subunit GltK
b2068	0.576463	3.95511	6.28117	0.000216901	0.000870809	0.00699752	alkA	DNA-3-methyladenine glycosylase 2
b3998	0.375285	6.42657	6.27919	0.000217375	0.000871908	-0.48767	nfi	endonuclease V
b0028	0.354007	7.01651	6.27746	0.000217789	0.000872765	-0.575478	fkpB	peptidyl-prolyl cis-trans isomerase FkpB
b2400	-0.258915	9.16426	-6.26823	0.000220013	0.000880862	-0.778414	gltX	glutamate--tRNA ligase
b4360	-0.490865	5.85113	-6.26351	0.000221158	0.000884632	-0.407	yjjA	DUF2501 domain-containing protein YjjA
b3601	0.459442	6.04427	6.25662	0.000222844	0.000890558	-0.451616	mtlR	transcriptional repressor MtlR
b0181	-0.320946	9.40908	-6.25215	0.000223945	0.000894132	-0.796543	lpxA	UDP-N-acetylglucosamine acyltransferase
b3235	-0.321065	6.77516	-6.25009	0.000224454	0.000895343	-0.573697	degS	serine endoprotease
b0025	0.2759	8.14823	6.24676	0.000225281	0.000897816	-0.749468	ribF	bifunctional riboflavin kinase/FMN adenylyltransferase
b2561	-0.827976	3.56914	-6.23603	0.000227965	0.000907682	0.0662479	yfhH	putative DNA-binding transcriptional regulator YfhH
b1841	0.409179	6.86826	6.2323	0.000228907	0.000910599	-0.609949	yobA	CopC domain-containing protein
b3468	0.521756	5.38556	6.22701	0.000230251	0.000914565	-0.369061	yhhN	conserved inner membrane enzyme YhhN
b0381	0.28359	7.80261	6.22672	0.000230325	0.000914565	-0.73427	ddlA	D-alanine--D-alanine ligase A
b1241	0.252306	9.07349	6.21432	0.000233509	0.00092636	-0.844927	adhE	aldehyde-alcohol dehydrogenase
b0740	-0.26911	10.0743	-6.21274	0.000233917	0.00092713	-0.835718	tolB	Tol-Pal system periplasmic protein TolB
b0268	1.20689	1.89189	6.20876	0.000234951	0.000930381	0.494576	yagE	CP4-6 prophage%3B putative 2-keto-3-deoxygluconate aldolase
b3467	0.718335	3.42527	6.2076	0.000235253	0.000930726	0.0557435	yhhM	DUF2500 domain-containing protein YhhM
b0195	-0.345267	6.40444	-6.20363	0.000236292	0.000933989	-0.573599	trmO	tRNA m(6)t(6)A37 methyltransferase
b4322	0.598324	3.90213	6.20196	0.000236728	0.000934861	-0.0752069	uxuA	D-mannonate dehydratase
b0886	0.326286	6.95333	6.19906	0.000237491	0.000937022	-0.662221	cydC	glutathione/L-cysteine ABC exporter subunit CydC
b4012	0.881126	2.47486	6.19004	0.000239883	0.000945599	0.295216	yjaB	putative N-acetyltransferase YjaB
b2404	-1.01848	6.46273	-6.18784	0.000240468	0.000947046	-0.589964	lysV	tRNA-Lys
b0714	0.435461	4.99201	6.18181	0.000242086	0.000952555	-0.345998	nei	endonuclease VIII
b1554	-0.734114	3.06673	-6.17089	0.000245044	0.000963321	0.115493	rrrQ	Qin prophage%3B putative lysozyme
b3972	-0.329225	6.89799	-6.16804	0.000245822	0.000965506	-0.690783	murB	UDP-N-acetylenolpyruvoylglucosamine reductase
b0969	-0.387344	6.02901	-6.16144	0.000247637	0.000971757	-0.563029	tusE	sulfur transfer protein TusE
b0961	-0.605213	4.86487	-6.15088	0.000250569	0.000982373	-0.350314	yccF	conserved inner membrane protein YccF
b3929	0.417863	6.44804	6.14826	0.000251302	0.000984361	-0.650084	rraA	ribonuclease E inhibitor protein A
b2890	-0.265622	10.0508	-6.14318	0.000252732	0.00098907	-0.920987	lysS	lysine--tRNA ligase%2C constitutive
b2350	-0.348717	6.22946	-6.13171	0.000255991	0.00100092	-0.633195	yfdG	CPS-53 (KpLE1) prophage%3B putative bactoprenol-linked glucose translocase
b2550	0.492109	4.63274	6.12678	0.000257405	0.00100555	-0.336812	yphH	putative DNA-binding transcriptional regulator%2C NAGC-like
b1132	-0.326325	7.06211	-6.11265	0.00026151	0.00102066	-0.780899	hflD	lysogenization regulator
b2520	0.274571	8.437	6.11183	0.00026175	0.00102068	-0.942021	yfhM	alpha2-macroglobulin
b4458	-0.848713	2.53622	-6.10817	0.000262827	0.00102396	0.189624	oxyS	small regulatory RNA OxyS
b3592	0.487028	5.12001	6.10524	0.000263689	0.0010264	-0.465586	yibF	glutathione transferase-like protein YibF
b2233	0.566939	4.98257	6.09308	0.000267311	0.00103892	-0.451266	yfaL	putative autotransporter adhesin YfaL
b2038	-0.478476	6.29475	-6.09284	0.000267384	0.00103892	-0.690125	rfbC	dTDP-4-dehydrorhamnose 3%2C5-epimerase
b2892	0.264585	8.45741	6.08421	0.000269988	0.0010481	-0.977789	recJ	ssDNA-specific exonuclease RecJ
b1768	-0.388872	6.24909	-6.07757	0.000272012	0.00105502	-0.7026	pncA	nicotinamidase
b2495	0.380952	6.05693	6.07423	0.000273034	0.00105804	-0.676993	yfgD	putative oxidoreductase YfgD
b3029	0.332723	6.51498	6.07272	0.000273499	0.00105889	-0.753923	ygiN	putative quinol monooxygenase YgiN
b3463	0.390452	6.70598	6.07063	0.000274144	0.00106045	-0.784989	ftsE	cell division protein FtsE
b1069	-0.404814	6.09962	-6.06486	0.000275931	0.00106641	-0.693512	murJ	putative lipid II flippase MurJ
b2603	-0.476335	4.84868	-6.05845	0.00027793	0.00107318	-0.46314	yfiR	DUF4154 domain-containing protein YfiR
b4203	-0.376	12.4418	-6.05399	0.000279332	0.00107763	-1.00725	rplI	50S ribosomal subunit protein L9
b0027	0.407571	7.71261	6.05195	0.000279974	0.00107915	-0.937584	lspA	lipoprotein signal peptidase
b2297	-0.28128	9.98338	-6.03405	0.000285689	0.00110021	-1.05641	pta	phosphate acetyltransferase
b1295	-0.463434	4.63345	-6.02956	0.000287143	0.00110483	-0.452856	ymjA	DUF2543 domain-containing protein YmjA
b0239	-0.461113	6.3936	-6.0252	0.000288563	0.00110931	-0.789773	frsA	fermentation-respiration switch protein
b3522	0.800611	3.51804	6.01934	0.000290484	0.0011157	-0.195988	yhjD	putative transporter YhjD
b1207	-0.281841	9.42561	-6.01849	0.000290764	0.00111579	-1.08329	prs	ribose-phosphate diphosphokinase
b2584	-0.352953	5.96952	-6.01642	0.000291446	0.00111742	-0.73193	patZ	peptidyl-lysine acetyltransferase
b2472	0.29411	7.10481	6.00475	0.000295325	0.0011313	-0.921438	dapE	succinyl-diaminopimelate desuccinylase
b0894	-0.598787	4.12055	-5.99407	0.000298925	0.00114408	-0.375999	dmsA	dimethyl sulfoxide reductase subunit A
b3788	-0.295322	7.65069	-5.98207	0.000303027	0.00115876	-1.01633	rffG	dTDP-glucose 4%2C6-dehydratase 2
b1047	-0.468283	6.30196	-5.98101	0.000303392	0.00115913	-0.829944	opgC	protein required for succinyl modification of osmoregulated periplasmic glucans
b1604	0.481568	6.26893	5.98019	0.000303676	0.0011592	-0.828307	ydgH	DUF1471 domain-containing protein YdgH
b3724	0.430347	5.7663	5.97811	0.000304394	0.00116092	-0.746072	phoU	negative regulator of the pho regulon
b3416	0.494654	5.72336	5.95081	0.000314007	0.00119653	-0.771983	malQ	4-alpha-glucanotransferase
b3017	-0.299986	7.91224	-5.94077	0.000317625	0.00120886	-1.09865	ftsP	cell division protein required during stress conditions
b1789	-0.585063	3.92329	-5.94029	0.000317799	0.00120886	-0.395079	yeaL	conserved inner membrane protein YeaL
b3464	0.365684	7.381	5.93525	0.000319635	0.00121478	-1.04266	ftsY	signal recognition particle receptor
b2496	-0.338242	6.72742	-5.93316	0.0003204	0.00121662	-0.957065	hda	inibitor of reinitiation of DNA replication
b3838	0.323889	7.56999	5.93196	0.000320838	0.00121722	-1.06993	tatB	twin arginine protein translocation system - TatB protein
b0797	-0.246688	9.75891	-5.93047	0.000321385	0.00121823	-1.18863	rhlE	ATP-dependent RNA helicase RhlE
b2098	0.513017	4.07364	5.92789	0.000322337	0.00122078	-0.456154	yegT	putative transporter YegT
b0888	-0.274192	8.21328	-5.92471	0.000323512	0.00122416	-1.15173	trxB	thioredoxin reductase
b3650	-0.28185	9.82763	-5.92362	0.000323915	0.0012244	-1.19629	spoT	bifunctional (p)ppGpp synthase/hydrolase SpoT
b1715	-1.10448	2.30112	-5.92301	0.000324139	0.0012244	0.0424688	pheM	pheST-ihfA operon leader peptide
b4070	0.563513	3.75813	5.91646	0.000326578	0.00123254	-0.391296	nrfA	cytochrome c552 nitrite reductase
b2688	-0.255946	9.05204	-5.90534	0.000330766	0.00124726	-1.22529	gshA	glutamate--cysteine ligase
b4190	0.621469	3.58965	5.90091	0.000332451	0.00125253	-0.36635	yjfP	carboxylesterase
b3673	-0.483497	5.85693	-5.89421	0.000335019	0.00126111	-0.863588	emrD	multidrug efflux pump EmrD
b4386	0.412338	5.23123	5.88864	0.000337167	0.0012681	-0.758021	lplA	lipoate--protein ligase A
b0793	0.683615	3.3431	5.88572	0.0003383	0.00127126	-0.319461	ybhS	putative ABC exporter membrane subunit YbhS
b3760	-1.13156	3.29667	-5.88249	0.00033956	0.00127489	-0.283557	aspT	tRNA-Asp
b0106	-0.610198	3.51549	-5.87996	0.000340548	0.0012775	-0.366073	hofC	inner membrane protein HofC
b2805	0.523701	4.47335	5.8762	0.000342022	0.00128192	-0.612576	fucR	DNA-binding transcriptional activator FucR
b1244	-0.28077	8.25139	-5.8664	0.000345901	0.00129439	-1.2288	oppB	murein tripeptide ABC transporter/oligopeptide ABC transporter inner membrane subunit OppB
b2345	-0.904588	2.59123	-5.86612	0.000346015	0.00129439	-0.120786	yfdF	protein YfdF
b2610	0.257085	8.97912	5.86554	0.000346244	0.00129439	-1.2763	ffh	signal recognition particle protein component
b2687	-0.298617	6.90315	-5.86468	0.00034659	0.00129457	-1.06857	luxS	S-ribosylhomocysteine lyase
b0662	0.546612	3.78666	5.86056	0.000348239	0.00129961	-0.46901	ubiF	2-octaprenyl-3-methyl-6-methoxy-1%2C4-benzoquinol hydroxylase
b3252	0.26871	7.72058	5.85111	0.000352051	0.00131271	-1.19	csrD	regulator of CsrB and CsrC decay
b3424	-0.324708	6.88366	-5.85014	0.000352446	0.00131306	-1.08396	glpG	rhomboid protease
b1986	-0.9036	3.55133	-5.84731	0.0003536	0.00131573	-0.405791	asnU	tRNA-Asn
b0720	0.407927	6.05409	5.84689	0.00035377	0.00131573	-0.960276	gltA	citrate synthase
b0522	-0.365576	6.13332	-5.84461	0.000354704	0.00131792	-0.974709	purK	5-(carboxyamino)imidazole ribonucleotide synthase
b1215	-0.302899	8.20824	-5.84397	0.000354965	0.00131792	-1.25262	kdsA	3-deoxy-D-manno-octulosonate 8-phosphate synthase
b3810	0.40132	6.33458	5.81969	0.000365069	0.00135428	-1.04127	yigA	conserved protein YigA
b1872	0.775876	2.54791	5.81666	0.000366351	0.00135787	-0.188187	torZ	trimethylamine N-oxide reductase 2
b1876	-0.267937	8.1635	-5.81091	0.000368801	0.00136579	-1.29032	argS	arginine--tRNA ligase
b3361	-0.612843	3.79866	-5.80891	0.000369657	0.0013678	-0.528	fic	putative adenosine monophosphate--protein transferase Fic
b1448	0.452644	4.53507	5.80393	0.000371797	0.00137454	-0.718315	mnaT	L-amino acid N-acyltransferase
b4004	0.625941	4.54984	5.7923	0.000376849	0.00139204	-0.733867	zraR	DNA-binding transcriptional activator ZraR
b4689	-1.18762	1.45733	-5.7828	0.000381028	0.00140627	0.107194	rzoQ	Qin prophage%3B putative lipoprotein RzoQ
b0261	0.438546	4.99086	5.76456	0.000389206	0.00143524	-0.865527	mmuM	homocysteine S-methyltransferase
b2176	-0.317236	6.63064	-5.7617	0.000390504	0.0014388	-1.15967	pdeN	putative c-di-GMP phosphodiesterase PdeN
b0068	-0.396826	5.61721	-5.75885	0.0003918	0.00144236	-0.99301	thiB	thiamine ABC transporter periplasmic binding protein
b1111	0.375016	5.39687	5.75121	0.000395306	0.00145347	-0.965011	comR	DNA-binding transcriptional repressor ComR
b0008	0.248496	10.1713	5.75053	0.000395623	0.00145347	-1.41096	talB	transaldolase B
b1099	-0.323893	6.78605	-5.7501	0.000395822	0.00145347	-1.19735	holB	DNA polymerase III subunit delta'
b3473	0.51556	5.23393	5.74474	0.000398305	0.00146135	-0.939643	yhhS	putative transporter YhhS
b2132	0.438754	6.73608	5.74392	0.000398683	0.0014615	-1.19948	bglX	beta-D-glucoside glucohydrolase%2C periplasmic
b1505	-1.75936	0.738264	-5.74029	0.000400377	0.00146647	0.253789	ydeT	fimbrial usher domain-containing protein YdeT
b0792	0.609486	3.3603	5.73686	0.000401986	0.00147113	-0.513641	ybhR	putative ABC exporter membrane subunit YbhR
b4374	-0.320361	6.41249	-5.73514	0.000402796	0.0014727	-1.15981	yjjG	pyrimidine nucleotidase
b0923	0.364718	6.36011	5.7345	0.000403095	0.0014727	-1.15408	mukE	chromosome partitioning protein MukE
b0053	0.240104	9.54661	5.73302	0.000403792	0.00147401	-1.44198	surA	peptidyl-prolyl cis-trans isomerase SurA
b4201	-0.288518	11.7386	-5.72541	0.000407404	0.00148525	-1.43027	priB	primosomal replication protein N
b3415	0.395302	6.06118	5.72509	0.000407555	0.00148525	-1.11645	gntT	high-affinity gluconate transporter
b3987	-0.300337	12.2552	-5.72277	0.000408663	0.00148804	-1.42739	rpoB	RNA polymerase subunit beta
b3124	0.724699	2.96334	5.72112	0.000409453	0.00148967	-0.424758	garK	glycerate 2-kinase 1
b1270	0.526261	4.6538	5.71889	0.000410524	0.00149231	-0.851488	btuR	cobinamide/cobalamin adenosyltransferase
b4210	-0.437114	5.02024	-5.71496	0.000412419	0.00149795	-0.931403	ytfF	inner membrane protein YtfF
b2028	-0.741418	5.20936	-5.7116	0.000414042	0.00150259	-0.967052	ugd	UDP-glucose 6-dehydrogenase
b0929	-0.300746	10.7047	-5.70677	0.000416395	0.00150987	-1.46244	ompF	outer membrane porin F
b0163	0.402678	5.85186	5.70158	0.000418937	0.00151782	-1.11082	yaeH	DUF3461 domain-containing protein YaeH
b1192	0.441586	4.65332	5.6987	0.000420358	0.00152169	-0.878165	ldcA	murein L%2CD-carboxypeptidase
b4389	0.29501	7.39631	5.69612	0.000421632	0.00152504	-1.34815	radA	DNA recombination protein
b4558	0.402176	5.56992	5.69521	0.000422079	0.00152539	-1.0689	yifL	putative lipoprotein YifL
b1592	-0.535471	4.07978	-5.69278	0.000423286	0.00152847	-0.74802	clcB	putative chloride:H(+) antiporter ClcB
b0987	-0.955593	2.18206	-5.69155	0.0004239	0.00152942	-0.223497	gfcA	threonine-rich inner membrane protein GfcA
b3496	0.414601	5.33282	5.68733	0.000426007	0.00153575	-1.03397	dtpB	dipeptide/tripeptide:H(+) symporter DtpB
b3193	0.305831	7.1477	5.6809	0.000429236	0.0015461	-1.33662	mlaD	intermembrane phospholipid transport system%2C substrate binding protein MlaD
b4472	0.261909	7.81985	5.67843	0.000430488	0.00154933	-1.42226	yhdP	AsmA2 domain-containing protein
b1824	0.262661	7.98356	5.66151	0.000439148	0.00157919	-1.46333	yobF	DUF2527 domain-containing protein YobF
b0146	0.569272	5.2204	5.65333	0.000443403	0.00159317	-1.05348	sfsA	putative DNA-binding transcriptional regulator of maltose metabolism
b3908	0.274355	9.94089	5.65012	0.000445087	0.00159769	-1.54274	sodA	superoxide dismutase (Mn)
b0728	-0.264431	7.46664	-5.64952	0.000445397	0.00159769	-1.41609	sucC	succinyl-CoA synthetase subunit beta
b1560	-1.02098	2.29199	-5.64584	0.000447339	0.00160333	-0.308003	ydfU	Qin prophage%3B protein YdfU
b0506	0.523072	5.45135	5.64276	0.000448968	0.00160785	-1.11297	allR	DNA-binding transcriptional repressor AllR
b3545	0.75597	2.83196	5.6345	0.000453372	0.00162228	-0.498513	proK	tRNA-Pro
b2211	-0.287648	7.11868	-5.62874	0.00045647	0.00163202	-1.39906	yojI	ABC transporter family protein/microcin J25 efflux protein
b0171	-0.259627	8.20328	-5.62567	0.000458132	0.00163661	-1.53202	pyrH	UMP kinase
b2323	-0.699053	8.4653	-5.62211	0.000460066	0.00164203	-1.55247	fabB	beta-ketoacyl-[acyl carrier protein] synthase I
b0281	0.493106	5.45486	5.62149	0.000460405	0.00164203	-1.14164	intF	CP4-6 prophage%3B putative phage integrase
b1532	0.410536	4.90063	5.62033	0.000461036	0.00164269	-1.03186	marB	multiple antibiotic resistance protein
b2288	-0.305204	6.70303	-5.61976	0.000461344	0.00164269	-1.353	nuoA	NADH:quinone oxidoreductase subunit A
b3716	-0.702991	3.12648	-5.60827	0.000467668	0.00166384	-0.605197	cbrB	putative inner membrane protein
b0056	-0.425533	6.10518	-5.59365	0.000475851	0.00169157	-1.29081	yabP	putative uncharacterized protein YabP
b0922	0.289769	6.80149	5.5907	0.000477521	0.00169612	-1.40708	mukF	chromosome partitioning protein MukF
b3712	0.276104	7.3738	5.58871	0.00047865	0.00169874	-1.48418	yieE	putative phosphopantetheinyl transferase
b0741	-0.24433	10.5267	-5.57264	0.00048789	0.00173012	-1.63725	pal	peptidoglycan-associated outer membrane lipoprotein Pal
b2401	-0.787585	6.8415	-5.57043	0.000489176	0.00173326	-1.43002	valU	tRNA-Val
b2837	0.394285	6.22044	5.56305	0.000493492	0.00174713	-1.3523	galR	DNA-binding transcriptional dual regulator GalR
b3410	0.728121	3.57731	5.56173	0.000494272	0.00174847	-0.792652	feoC	ferrous iron transport protein FeoC
b0366	2.08774	0.255329	5.55481	0.000498362	0.0017615	0.121042	tauB	taurine ABC transporter ATP binding subunit
b3081	0.937691	2.03562	5.53467	0.000510492	0.00180291	-0.396517	fadH	2%2C4-dienoyl-CoA reductase
b4090	1.23734	2.14268	5.52466	0.00051664	0.00182246	-0.424957	rpiB	allose-6-phosphate isomerase/ribose-5-phosphate isomerase B
b3346	0.286232	7.14481	5.5243	0.000516866	0.00182246	-1.5395	yheO	putative DNA-binding transcriptional regulator YheO
b2682	0.277551	7.37705	5.51723	0.000521256	0.00183645	-1.57782	ygaZ	L-valine exporter subunit YgaZ
b2898	0.282676	7.58775	5.51556	0.000522302	0.00183864	-1.60568	ygfZ	folate-binding protein
b4044	-0.367471	7.44614	-5.51145	0.000524882	0.00184623	-1.59264	dinF	DNA damage-inducible protein F
b2716	0.502782	3.93021	5.5059	0.000528389	0.00185706	-0.960458	ascB	6-phospho-beta-glucosidase AscB
b3030	-0.236719	8.81221	-5.49146	0.000537625	0.00188799	-1.75141	parE	DNA topoisomerase IV subunit B
b3291	0.359069	5.83974	5.49052	0.000538231	0.00188859	-1.38275	mscL	large conductance mechanosensitive channel
b3216	-0.631583	4.33208	-5.48615	0.000541065	0.001897	-1.07278	yhcD	putative fimbrial usher protein YhcD
b4686	-0.642532	3.27473	-5.48042	0.000544809	0.00190859	-0.813292	yshB	uncharacterized protein YshB
b2112	-0.805563	2.33784	-5.47902	0.000545725	0.00190969	-0.548302	yehE	DUF2574 domain-containing protein YehE
b0243	0.281275	7.48413	5.4786	0.000546003	0.00190969	-1.64156	proA	glutamate-5-semialdehyde dehydrogenase
b2809	1.12714	2.33187	5.47529	0.000548179	0.00191576	-0.548419	ygdI	DUF903 domain-containing lipoprotein YgdI
b2269	-1.00644	2.42431	-5.46741	0.000553408	0.00193114	-0.576558	elaD	protease ElaD
b4653	-1.17919	1.64104	-5.46731	0.000553468	0.00193114	-0.344834
b1836	-0.719288	3.04651	-5.4614	0.000557425	0.00194338	-0.7739	yebV	protein YebV
b3352	0.262536	7.69846	5.46016	0.000558264	0.00194475	-1.69188	yheS	ABC transporter ATP-binding protein YheS
b0316	0.369854	5.28643	5.44829	0.00056631	0.00197119	-1.33602	yahB	putative LysR-type DNA-binding transcriptional regulator YahB
b1447	0.512737	3.96295	5.4468	0.00056733	0.00197316	-1.04584	ydcZ	putative inner membrane protein
b3241	-0.786376	3.60305	-5.44556	0.000568183	0.00197455	-0.939436	aaeA	aromatic carboxylic acid efflux pump membrane fusion protein
b2037	-0.435005	7.00566	-5.43893	0.000572749	0.00198662	-1.63085	rfbX	polyisoprenol-linked O-antigen repeat unit flippase
b1249	0.378176	7.1062	5.43873	0.000572888	0.00198662	-1.64669	clsA	cardiolipin synthase A
b1822	-0.308627	6.55139	-5.43853	0.000573029	0.00198662	-1.56704	rlmA	23S rRNA m(1)G745 methyltransferase
b1289	-0.578593	3.60126	-5.42995	0.000579001	0.00200573	-0.96722	ycjD	DUF559 domain-containing protein YcjD
b2690	-0.293485	6.90865	-5.4292	0.000579527	0.00200595	-1.63176	yqaB	fructose-1-phosphatase
b0814	-0.243717	10.6548	-5.42704	0.000581046	0.0020096	-1.82727	ompX	outer membrane protein X
b1277	0.322326	6.8541	5.42238	0.000584329	0.00201935	-1.6349	ribA	GTP cyclohydrolase 2
b0168	0.229305	8.64194	5.42018	0.00058589	0.00202124	-1.83951	map	methionine aminopeptidase
b3552	0.265754	7.60117	5.41967	0.000586252	0.00202124	-1.73353	yiaD	PF13488 family lipoprotein YiaD
b1913	-0.256608	7.58035	-5.41965	0.00058627	0.00202124	-1.73043	uvrC	excision nuclease subunit C
b0192	0.330913	6.30053	5.41387	0.000590388	0.00203382	-1.56169	nlpE	lipoprotein NlpE
b1847	0.281562	6.78858	5.4114	0.00059216	0.00203831	-1.64039	yebF	secreted protein YebF
b3773	0.634023	4.95304	5.41033	0.000592925	0.00203932	-1.31497	ilvY	DNA-binding transcriptional dual regulator IlvY
b3658	-1.14524	1.35921	-5.40215	0.000598835	0.00205802	-0.353543	selC	tRNA-Sec
b3728	0.397734	6.94741	5.38981	0.000607877	0.00208652	-1.69035	pstS	phosphate ABC transporter periplasmic binding protein
b3654	0.458028	4.40534	5.38953	0.000608089	0.00208652	-1.22641	xanP	xanthine:H(+) symporter XanP
b0459	0.240659	8.2618	5.38154	0.000614018	0.0021052	-1.85979	maa	maltose O-acetyltransferase
b4313	-0.677678	2.86148	-5.37882	0.000616059	0.00211054	-0.832134	fimE	regulator for fimA
b3866	-0.36544	5.875	-5.37377	0.000619855	0.00212187	-1.54074	yihI	Der GTPase-activating protein YihI
b4500	-0.416651	4.7042	-5.3728	0.000620586	0.0021227	-1.3109	yfaS	putative macroglobulin family protein%2C N-terminal fragment
b3091	0.49419	4.1217	5.37132	0.00062171	0.00212454	-1.18426	uxaA	D-altronate dehydratase
b0242	0.273196	7.3807	5.3708	0.000622102	0.00212454	-1.77148	proB	glutamate 5-kinase
b4375	-0.242751	8.91116	-5.36377	0.000627449	0.00214111	-1.92362	prfC	peptide chain release factor RF3
b0388	-0.303012	6.93852	-5.36037	0.000630059	0.00214833	-1.72711	aroL	shikimate kinase 2
b3781	0.295829	9.30112	5.3597	0.00063057	0.00214839	-1.93259	trxA	thioredoxin 1
b3020	-0.452181	4.44049	-5.35731	0.000632416	0.00215299	-1.27237	ygiS	putative deoxycholate binding periplasmic protein
b1869	-0.530419	5.25422	-5.34676	0.000640608	0.00217824	-1.45754	yecN	putative inner membrane protein
b2862	-0.607341	3.66606	-5.34595	0.000641238	0.00217824	-1.09391	ygeP	protein YgeP
b2697	0.223125	10.9052	5.34583	0.000641337	0.00217824	-1.93324	alaS	alanine--tRNA ligase/DNA-binding transcriptional repressor
b2747	-0.29498	6.92153	-5.34363	0.000643062	0.00218062	-1.74712	ispD	2-C-methyl-D-erythritol 4-phosphate cytidylyltransferase
b4378	0.624648	3.14157	5.34303	0.000643533	0.00218062	-0.966305	yjjV	putative DNase YjjV
b0820	-0.222256	8.5156	-5.34302	0.000643544	0.00218062	-1.93146	ybiT	ABC transporter ATP-binding protein YbiT
b3462	0.30684	7.35192	5.33841	0.000647173	0.00219121	-1.81097	ftsX	cell division protein FtsX
b0315	-0.356968	5.45031	-5.33505	0.000649841	0.00219853	-1.51478	pdeL	DNA-binding transcriptional activator/c-di-GMP phosphodiesterase PdeL
b2642	-0.517038	3.72348	-5.32338	0.000659183	0.0022284	-1.14166	yfjW	CP4-57 prophage%3B uncharacterized protein YfjW
b0726	-0.24974	7.46933	-5.32245	0.000659933	0.0022292	-1.84614	sucA	subunit of E1(0) component of 2-oxoglutarate dehydrogenase
b1479	-0.31611	7.20797	-5.32124	0.000660913	0.00223078	-1.81465	maeA	malate dehydrogenase%2C NAD-requiring
b2310	-0.367923	5.30767	-5.31425	0.000666598	0.00224821	-1.51446	argT	lysine/arginine/ornithine ABC transporter periplasmic binding protein
b3355	0.354211	5.64161	5.31255	0.000667988	0.00225116	-1.58352	prkB	putative phosphoribulokinase
b1400	0.528042	4.03298	5.29813	0.000679915	0.0022892	-1.25998	paaY	2-hydroxycyclohepta-1%2C4%2C6-triene-1-carboxyl-CoA thioesterase
b1778	0.369391	5.56016	5.29763	0.000680331	0.0022892	-1.58857	msrB	methionine sulfoxide reductase B
b1054	-0.260212	7.05813	-5.26989	0.000703938	0.0023668	-1.8644	lpxL	lauroyl acyltransferase
b3786	-0.268203	7.70522	-5.26475	0.000708417	0.00238002	-1.95198	wecB	UDP-N-acetylglucosamine 2-epimerase
b3200	0.336169	7.65462	5.25705	0.000715169	0.00240085	-1.95687	lptA	lipopolysaccharide transport system protein LptA
b2949	0.314115	6.52514	5.25568	0.000716384	0.00240307	-1.80881	yqgF	ribonuclease H-like domain containing nuclease
b3026	0.447405	4.25344	5.25183	0.000719793	0.00241264	-1.37538	qseC	sensory histidine kinase QseC
b0407	0.240187	8.4219	5.2485	0.000722756	0.0024207	-2.05258	yajC	Sec translocon accessory complex subunit YajC
b2185	-0.230547	10.677	-5.24727	0.000723855	0.00242252	-2.067	rplY	50S ribosomal subunit protein L25
b1611	0.40964	5.06524	5.24291	0.000727764	0.00243372	-1.5641	fumC	fumarase C
b4040	-0.290468	6.70485	-5.24058	0.000729867	0.00243888	-1.85432	ubiA	4-hydroxybenzoate octaprenyltransferase
b3997	0.347813	7.26384	5.23827	0.000731952	0.00244396	-1.93418	hemE	uroporphyrinogen decarboxylase
b0487	0.399519	4.60721	5.23381	0.000736	0.00245559	-1.47928	cueR	DNA-binding transcriptional dual regulator CueR
b3520	-0.64474	2.90785	-5.22758	0.000741694	0.00247269	-1.04762	yhjB	putative DNA-binding transcriptional regulator YhjB
b3336	0.725373	3.82965	5.22601	0.000743139	0.00247561	-1.30178	bfr	bacterioferritin
b0468	0.365799	5.80728	5.22513	0.000743948	0.00247641	-1.73016	ybaN	conserved inner membrane protein YbaN
b1160	-1.27445	0.928262	-5.22169	0.00074712	0.00248506	-0.472932	iraM	anti-adaptor protein IraM%2C inhibitor of sigma(S) proteolysis
b3792	-0.354195	6.44837	-5.22025	0.000748458	0.00248761	-1.8419	wzxE	lipid III flippase
b0600	0.505451	4.06383	5.20808	0.000759832	0.00252348	-1.38854	ybdL	methionine-oxo-acid transaminase%2C PLP-dependent
b3058	-0.531752	4.13387	-5.20556	0.000762218	0.00252833	-1.4018	folB	dihydroneopterin aldolase
b4017	-0.887525	3.54119	-5.2053	0.000762456	0.00252833	-1.23932	arpA	regulator of acetyl CoA synthetase
b1178	1.27723	1.14215	5.19087	0.000776245	0.00257209	-0.580635	pliG	inhibitor of g-type lysozyme
b4519	-0.679653	2.69055	-5.19011	0.000776983	0.00257257	-1.03573	icdC	protein IcdC
b1848	0.297613	6.82662	5.18561	0.000781339	0.00258502	-1.9481	yebG	DNA damage-inducible protein YebG
b1652	-0.327922	6.12564	-5.1823	0.000784562	0.00258992	-1.84086	rnt	RNase T
b1525	-0.397742	4.68932	-5.18226	0.000784599	0.00258992	-1.56334	sad	NAD(+)-dependent succinate semialdehyde dehydrogenase
b3516	-0.441655	4.39521	-5.18175	0.000785105	0.00258992	-1.4975	gadX	DNA-binding transcriptional dual regulator GadX
b4461	-0.301125	6.44433	-5.18129	0.000785548	0.00258992	-1.8945	yfjD	putative inner membrane protein
b4158	-0.667133	3.13624	-5.18104	0.000785798	0.00258992	-1.17203	yjeO	conserved inner membrane protein YjeO
b3351	0.517619	4.23314	5.17728	0.000789476	0.00260006	-1.47016	kefG	protein required for KefB activity
b3747	-0.513531	5.39969	-5.16938	0.000797285	0.00262379	-1.72496	kup	K(+):H(+) symporter Kup
b3864	-0.565289	3.73236	-5.16707	0.000799586	0.00262937	-1.35247	spf	small regulatory RNA Spot 42
b0727	-0.266615	7.83826	-5.1664	0.000800247	0.00262956	-2.10065	sucB	dihydrolipoyltranssuccinylase
b4261	0.414486	7.63803	5.1555	0.000811209	0.00266356	-2.09206	lptF	lipopolysaccharide transport system protein LptF
b0848	-0.577177	3.22547	-5.15191	0.000814851	0.0026735	-1.23876	ybjM	putative inner membrane protein
b3242	-1.04738	1.43938	-5.14319	0.000823769	0.00270072	-0.721077	aaeX	DUF1656 domain-containing protein AaeX
b2553	0.292488	6.09412	5.13775	0.000829388	0.00271709	-1.89794	glnB	nitrogen regulatory protein PII-1
b1750	-1.07585	1.83562	-5.13471	0.000832549	0.00272539	-0.844165	ydjX	DedA family protein YdjX
b3635	-0.356429	6.2096	-5.13051	0.000836934	0.00273768	-1.92488	mutM	DNA-formamidopyrimidine glycosylase
b4157	-0.807833	2.51643	-5.12723	0.000840381	0.00274689	-1.06495	yjeN	protein YjeN
b0729	-0.274406	7.09784	-5.12487	0.000842866	0.00275294	-2.06585	sucD	succinyl-CoA synthetase subunit alpha
b4150	-0.527923	3.71277	-5.11925	0.000848818	0.0027703	-1.41339	ampC	beta-lactamase
b3162	-0.255715	12.6343	-5.11827	0.000849865	0.00277163	-2.22105	deaD	ATP-dependent RNA helicase DeaD
b2925	0.211719	9.13644	5.11331	0.000855166	0.00278683	-2.2659	fbaA	fructose-bisphosphate aldolase class II
b3983	-0.230595	11.9015	-5.10924	0.000859539	0.00279858	-2.24409	rplK	50S ribosomal subunit protein L11
b1033	0.440889	4.15961	5.10876	0.000860061	0.00279858	-1.54701	ghrA	glyoxylate/hydroxypyruvate reductase A
b1617	-0.783407	2.61551	-5.10805	0.000860826	0.00279897	-1.1213	uidA	beta-glucuronidase
b0419	-0.319745	5.60712	-5.0984	0.00087132	0.00283098	-1.86423	yajO	1-deoxyxylulose-5-phosphate synthase YajO
b3713	0.297623	6.66025	5.0932	0.000877032	0.0028474	-2.04999	yieF	chromate reductase
b0182	-0.318841	8.10283	-5.09178	0.000878597	0.00284917	-2.23188	lpxB	lipid A disaccharide synthase
b3697	0.308485	6.54278	5.09151	0.000878888	0.00284917	-2.03424	yidA	sugar phosphatase YidA
b4646	-0.684141	2.59569	-5.08829	0.000882454	0.0028586	-1.14636
b2923	-0.375138	5.04798	-5.08652	0.000884427	0.00286285	-1.7698	argO	L-arginine exporter
b2183	-0.2998	7.27066	-5.08114	0.000890426	0.00288013	-2.14759	rsuA	16S rRNA pseudouridine(516) synthase
b2305	-0.732845	3.08616	-5.07441	0.00089801	0.0029025	-1.30027	rpnB	recombination-promoting nuclease RpnB
b3089	0.483082	7.41743	5.07083	0.000902062	0.00291343	-2.18046	sstT	serine/threonine:Na(+) symporter
b3933	0.245451	7.47483	5.06419	0.000909651	0.00293499	-2.19718	ftsN	cell division protein FtsN
b2845	-0.317581	6.04497	-5.0638	0.000910091	0.00293499	-1.98887	yqeG	putative transporter YqeG
b3214	-0.464932	3.89773	-5.06155	0.000912674	0.00294114	-1.54106	gltF	periplasmic protein GltF
b1645	-0.467486	4.84536	-5.05592	0.000919186	0.00295993	-1.76785	ydhK	putative transporter YdhK
b3665	-0.364218	5.11967	-5.05477	0.000920525	0.00296204	-1.82805	adeD	adenine deaminase
b2375	1.06028	1.62082	5.05234	0.000923344	0.00296892	-0.907874	yfdX	protein YfdX
b1799	0.626929	2.85031	5.04634	0.000930373	0.00298931	-1.28594	dmlR	DNA-binding transcriptional regulator DmlR
b2948	0.248311	7.26924	5.04303	0.000934267	0.0029996	-2.20092	yqgE	DUF179 domain-containing protein YqgE
b4377	0.539613	3.55305	5.03557	0.000943119	0.00302578	-1.49243	yjjU	putative patatin-like phospholipase YjjU
b3846	0.941406	2.12649	5.03493	0.000943889	0.00302602	-1.08432	fadB	dodecenoyl-CoA delta-isomerase%2C enoyl-CoA hydratase%2C 3-hydroxybutyryl-CoA epimerase%2C 3-hydroxyacyl-CoA dehydrogenase
b0094	0.264563	7.79951	5.03282	0.000946413	0.00303187	-2.27971	ftsA	cell division protein FtsA
b0144	-0.466196	4.95933	-5.0241	0.000956914	0.00306325	-1.83546	gluQ	glutamyl-Q tRNA(Asp) synthetase
b3698	-0.645586	3.18576	-5.02253	0.000958821	0.0030671	-1.40257	yidB	conserved protein YidB
b0507	1.03879	1.38606	5.01482	0.000968236	0.00309493	-0.893107	gcl	glyoxylate carboligase
b3348	-0.410899	5.5133	-5.01152	0.0009723	0.00310564	-1.96452	slyX	protein SlyX
b0881	0.533675	4.87066	5.0076	0.000977144	0.00311882	-1.84252	clpS	specificity factor for ClpA-ClpP chaperone-protease complex
b3868	-0.300812	6.40286	-5.00479	0.000980639	0.00312768	-2.12933	glnG	DNA-binding transcriptional dual regulator NtrC
b3002	-0.267208	6.54012	-5.0001	0.000986493	0.00314404	-2.15772	yqhA	uncharacterized protein YqhA
b3191	0.30707	6.71106	4.99061	0.000998463	0.00317985	-2.1984	mlaB	intermembrane phospholipid transport system protein MlaB
b4308	-0.592922	3.469	-4.98667	0.00100347	0.00319347	-1.52925	yjhR	KpLE2 phage-like element%3B PLD-like domain-containing protein YjhR
b3884	0.429195	4.82078	4.98108	0.00101064	0.00321392	-1.86955	yihW	putative DNA-binding transcriptional regulator YihW
b2268	-0.313852	5.52751	-4.97609	0.00101707	0.00323202	-2.01772	rbn	ribonuclease BN
b0803	1.07497	1.18404	4.97436	0.00101932	0.0032368	-0.890746	ybiI	zinc finger domain-containing protein YbiI
b3149	0.314918	6.26625	4.97151	0.00102302	0.00324618	-2.15489	diaA	DnaA initiator-associating factor for replication initiation
b3230	-0.24173	12.3446	-4.96806	0.00102753	0.0032559	-2.43254	rpsI	30S ribosomal subunit protein S9
b0372	-1.10662	1.38093	-4.96802	0.00102759	0.0032559	-0.938355	insF-2	IS3 element protein InsF
b0599	0.415544	4.29078	4.94039	0.00106448	0.00337034	-1.80938	hcxA	hydroxycarboxylate dehydrogenase A
b3533	-0.453757	4.88164	-4.93617	0.00107025	0.00338612	-1.94093	bcsA	cellulose synthase catalytic subunit
b1662	0.331063	6.76926	4.93407	0.00107313	0.00339276	-2.28505	ribC	riboflavin synthase
b3928	0.22873	8.15194	4.92746	0.00108223	0.00341907	-2.46606	zapB	cell division factor ZapB
b0211	0.255576	8.30022	4.92675	0.00108323	0.00341973	-2.48213	mltD	membrane-bound lytic murein transglycosylase D
b4235	0.336425	6.99016	4.90773	0.00110996	0.00350157	-2.35213	pmbA	metalloprotease PmbA
b1002	-0.529356	3.32464	-4.90089	0.00111975	0.00352988	-1.61123	agp	glucose-1-phosphatase
b0344	-0.741908	2.34106	-4.89813	0.00112373	0.00353987	-1.33116	lacZ	beta-galactosidase
b2891	-0.244004	9.25011	-4.89272	0.00113156	0.00356195	-2.56932	prfB	peptide chain release factor RF2
b4429	-0.732555	2.32784	-4.89052	0.00113477	0.00356946	-1.33843	sokB	putative small regulatory RNA SokB
b4134	-0.889142	2.00689	-4.8898	0.00113582	0.00357018	-1.23792	pheU	tRNA-Phe
b3388	-0.212315	9.64876	-4.88451	0.00114357	0.00359143	-2.57635	damX	cell division protein DamX
b3257	-0.696492	3.79704	-4.88385	0.00114455	0.00359143	-1.75274	yhdT	DUF997 domain-containing protein YhdT
b4063	-0.629688	2.76391	-4.8835	0.00114506	0.00359143	-1.47718	soxR	DNA-binding transcriptional dual regulator SoxR
b0186	-0.591877	4.59069	-4.87995	0.0011503	0.00360527	-1.9534	ldcC	lysine decarboxylase 2
b4554	0.46601	5.14849	4.87841	0.00115259	0.00360983	-2.08074	yibT	protein YibT
b4115	-0.880903	1.65244	-4.86927	0.00116624	0.00364995	-1.16244	adiC	arginine:agmatine antiporter
b0067	-0.427492	5.02392	-4.85391	0.00118958	0.00372034	-2.08597	thiP	thiamine ABC transporter membrane subunit
b4056	0.393522	4.3837	4.85189	0.00119268	0.00372734	-1.95413	yjbQ	UPF0047 protein YjbQ
b0183	-0.288475	7.05056	-4.84782	0.00119897	0.00374429	-2.44268	rnhB	RNase HII
b4691	-0.861322	2.08664	-4.83741	0.00121522	0.00379233	-1.33481	sroH	small RNA SroH
b1374	-0.643674	3.36763	-4.83278	0.00122252	0.00381236	-1.71381	pinR	Rac prophage%3B putative site-specific recombinase
b2997	-0.513701	3.34341	-4.83218	0.00122346	0.00381256	-1.71249	hybO	hydrogenase 2 small subunit
b2259	-0.492146	4.01719	-4.83031	0.00122644	0.0038191	-1.89047	pmrD	signal transduction protein PmrD
b1859	0.301884	5.70251	4.82208	0.00123957	0.00385722	-2.267	znuB	Zn(2(+)) ABC transporter membrane subunit
b2944	-0.485508	4.24777	-4.81291	0.0012544	0.00390058	-1.97074	yggI	conserved protein YggI
b2079	0.380866	4.68774	4.80979	0.00125948	0.00391357	-2.08025	baeR	DNA-binding transcriptional activator BaeR
b2874	0.624186	3.58148	4.80317	0.00127035	0.00394452	-1.82061	yqeA	putative amino acid kinase YqeA
b3609	0.233027	8.32242	4.80262	0.00127125	0.00394452	-2.65815	secB	SecB chaperone
b1209	0.331104	5.86977	4.794	0.00128558	0.0039861	-2.33568	lolB	outer membrane lipoprotein LolB
b2894	0.23824	7.06591	4.79345	0.00128649	0.0039861	-2.52264	xerD	site-specific recombinase
b3831	0.415354	7.34112	4.79089	0.00129078	0.00399655	-2.56065	udp	uridine phosphorylase
b2552	0.438454	3.93325	4.78931	0.00129344	0.00400192	-1.93427	hmp	nitric oxide dioxygenase
b1242	-0.369249	5.27799	-4.78023	0.00130882	0.00404662	-2.24186	ychE	putative inner membrane protein
b1582	-0.611307	2.77687	-4.77708	0.00131419	0.00406034	-1.6302	ynfA	conserved inner membrane protein YnfA
b3769	0.931547	1.96754	4.77153	0.00132373	0.00408692	-1.40263	ilvM	acetolactate synthase II subunit IlvM
b2377	0.537671	3.99125	4.7695	0.00132723	0.00409349	-1.97487	yfdY	DUF2545 domain-containing protein YfdY
b1994	-0.576651	3.24932	-4.7692	0.00132774	0.00409349	-1.77372	insH-6	CP4-44 prophage%3B IS5 transposase and trans-activator
b4122	-0.569887	2.99483	-4.76358	0.00133751	0.00412068	-1.71184	fumB	fumarase B
b0202	-1.17191	1.90589	-4.7581	0.0013471	0.00414729	-1.37324	ileV	tRNA-Ile
b2792	-0.566686	3.14259	-4.75493	0.00135269	0.00416154	-1.76521	yqcC	DUF446 domain-containing protein YqcC
b3954	0.41535	4.09012	4.75386	0.00135458	0.00416441	-2.02314	yijO	putative DNA-binding transcriptional regulator YijO
b1181	-0.353844	4.81259	-4.74762	0.00136568	0.00419555	-2.19209	ycgN	PF03693 family protein YcgN
b2831	0.370678	4.6497	4.74684	0.00136707	0.00419685	-2.1609	mutH	DNA mismatch repair protein MutH
b0868	-0.279486	6.09939	-4.74625	0.00136812	0.00419712	-2.44107	ybjS	putative NAD(P)H-binding oxidoreductase with NAD(P)-binding Rossmann-fold domain
b0568	-0.407138	4.81365	-4.74408	0.00137201	0.00420609	-2.19644	nfrA	bacteriophage N4 receptor%2C outer membrane protein
b0658	0.247515	8.58472	4.74314	0.00137369	0.00420825	-2.76358	ybeX	CorC-HlyC family protein YbeX
b1122	-0.575098	4.1067	-4.73942	0.00138039	0.0042258	-2.03749	ymfA	putative inner membrane protein
b4294	0.409741	4.38958	4.73254	0.00139287	0.00426101	-2.12334	insA-7	KpLE2 phage-like element%3B IS1 repressor protein InsA
b3096	0.237122	7.1826	4.73114	0.00139543	0.00426582	-2.62578	mzrA	modulator protein MzrA
b0475	-0.293677	5.82133	-4.72224	0.00141179	0.00431281	-2.4271	hemH	ferrochelatase
b3537	-0.59961	2.76658	-4.72079	0.00141446	0.00431794	-1.70711	bcsF	putative cellulose biosynthesis protein BcsF
b0118	-0.218115	10.0413	-4.71788	0.00141987	0.00433141	-2.80579	acnB	hypothetical protein
b2808	-0.281109	5.97727	-4.7155	0.00142431	0.00434191	-2.4639	gcvA	DNA-binding transcriptional dual regulator GcvA
b2982	-0.420043	4.63978	-4.71378	0.00142753	0.00434865	-2.20134	insH-9	IS5 transposase and trans-activator
b3098	0.264433	6.83585	4.71156	0.00143169	0.00435827	-2.60763	yqjD	ribosome- and membrane-associated DUF883 domain-containing protein YqjD
b2502	0.258651	7.02384	4.70932	0.0014359	0.00436803	-2.63625	ppx	exopolyphosphatase
b1019	-0.479953	4.32295	-4.70755	0.00143925	0.00437516	-2.13747	efeB	heme-containing peroxidase/deferrochelatase
b0800	0.291487	6.156	4.7025	0.00144881	0.00440114	-2.51417	ybiB	nonspecific DNA-binding protein YbiB
b1798	-0.428434	4.34134	-4.69829	0.00145686	0.00442249	-2.15601	leuE	leucine exporter
b0927	0.230969	7.86272	4.69511	0.00146295	0.00443789	-2.7603	gloC	hydroxyacylglutathione hydrolase GloC
b1399	0.419218	4.61447	4.69242	0.00146813	0.00445049	-2.22997	paaX	DNA-binding transcriptional repressor PaaX
b4669	1.26743	0.606817	4.67279	0.00150656	0.00456382	-1.14689	ilvX	uncharacterized protein IlvX
b2696	0.25563	8.85707	4.67067	0.00151077	0.00457337	-2.88008	csrA	carbon storage regulator
b1415	0.756717	4.37197	4.6698	0.00151251	0.00457545	-2.20217	aldA	aldehyde dehydrogenase A
b3198	0.285308	7.31714	4.66712	0.00151786	0.00458843	-2.73371	kdsC	3-deoxy-D-manno-octulosonate 8-phosphate phosphatase KdsC
b0645	-2.24504	-1.47323	-4.66558	0.00152094	0.00459292	-0.771852	ybeR	DUF1266 domain-containing protein YbeR
b3727	0.330709	5.66824	4.66532	0.00152146	0.00459292	-2.48273	pstC	phosphate ABC transporter membrane subunit PstC
b4252	0.432645	4.62096	4.66237	0.00152739	0.00460677	-2.27417	tabA	DUF386 domain-containing toxin-antitoxin biofilm protein TabA
b4043	0.200608	9.47865	4.66198	0.00152817	0.00460677	-2.89348	lexA	DNA-binding transcriptional repressor LexA
b4522	0.732079	2.41451	4.65586	0.00154056	0.00464092	-1.70389	ymiA	uncharacterized protein YmiA
b2175	-0.215054	9.07354	-4.65229	0.00154785	0.00465965	-2.90902	mepS	peptidoglycan DD-endopeptidase/peptidoglycan LD-carboxypeptidase
b1138	-0.757687	2.04849	-4.64758	0.0015575	0.00468543	-1.59525	ymfE	e14 prophage%3B uncharacterized protein YmfE
b4323	0.381979	4.78202	4.645	0.00156282	0.00469818	-2.33397	uxuB	D-mannonate oxidoreductase
b2318	0.319017	5.79091	4.64348	0.00156597	0.0047044	-2.53585	truA	tRNA pseudouridine(38-40) synthase
b0880	0.579136	3.17034	4.64009	0.00157299	0.00472225	-1.94203	cspD	DNA replication inhibitor
b0638	-0.381414	4.67197	-4.63384	0.00158605	0.00475815	-2.32309	cobC	putative adenosylcobalamin phosphatase/alpha-ribazole phosphatase
b0742	-0.222078	9.79668	-4.62629	0.00160199	0.00480267	-2.93983	cpoB	cell division coordinator CpoB
b1642	0.252332	7.17686	4.61813	0.0016194	0.00484994	-2.78629	slyA	DNA-binding transcriptional dual regulator SlyA
b4345	-0.458934	4.57299	-4.61741	0.00162095	0.00484994	-2.32323	mcrC	5-methylcytosine-specific restriction enzyme subunit McrC
b2153	-0.218325	7.55218	-4.61733	0.00162111	0.00484994	-2.83337	folE	GTP cyclohydrolase 1
b3403	0.228999	9.61688	4.61357	0.00162923	0.00487086	-2.96071	pck	phosphoenolpyruvate carboxykinase (ATP)
b2381	0.319143	5.10968	4.61058	0.0016357	0.00488684	-2.45281	ypdB	DNA-binding transcriptional activator YpdB
b1274	0.20064	10.9736	4.60955	0.00163794	0.00488781	-2.95238	topA	DNA topoisomerase 1
b3011	0.271473	6.04382	4.6094	0.00163827	0.00488781	-2.62829	yqhD	NADPH-dependent aldehyde reductase YqhD
b2285	-0.339967	5.57176	-4.60842	0.00164039	0.00489076	-2.54383	nuoE	NADH:quinone oxidoreductase subunit E
b2403	-0.948638	7.24221	-4.60767	0.00164203	0.0048923	-2.80134	valY	tRNA-Val
b0122	0.252779	6.79643	4.60328	0.00165161	0.00491748	-2.75683	yacC	putative lipoprotein YacC
b2863	-0.423741	5.65781	-4.60143	0.00165568	0.00492622	-2.56842	ygeQ	protein YgeQ
b1892	-1.22159	0.740524	-4.59896	0.00166111	0.004939	-1.27361	flhD	DNA-binding transcriptional dual regulator FlhD
b4432	0.50033	3.34366	4.59778	0.00166373	0.00494339	-2.0508	ryeA	small RNA RyeA
b1852	0.327471	7.9159	4.59384	0.00167246	0.00496593	-2.91143	zwf	NADP(+)-dependent glucose-6-phosphate dehydrogenase
b0108	-0.738496	2.37263	-4.59224	0.00167602	0.0049731	-1.77106	ppdD	prepilin peptidase-dependent protein
b1046	0.338767	4.84941	4.5913	0.00167811	0.00497591	-2.42563	clsC	cardiolipin synthase C
b1524	-0.383513	4.94781	-4.58541	0.00169131	0.00501162	-2.45163	glsB	glutaminase 2
b3069	-1.62009	-0.276658	-4.58235	0.00169822	0.00502868	-1.06135	ileX	tRNA-Ile
b0076	1.05501	1.92858	4.57614	0.00171231	0.00506696	-1.66219	leuO	DNA-binding transcriptional dual regulator LeuO
b3059	-0.355672	5.80823	-4.57517	0.00171452	0.00507002	-2.63444	plsY	putative glycerol-3-phosphate acyltransferase
b3649	-0.20255	8.60839	-4.57229	0.00172111	0.00508605	-3.00747	rpoZ	RNA polymerase subunit omega
b3813	-0.197988	8.36494	-4.57021	0.00172589	0.0050967	-2.99196	uvrD	ssDNA translocase and dsDNA helicase - DNA helicase II
b0525	0.238968	8.52245	4.56728	0.00173265	0.0051132	-3.01078	ppiB	peptidyl-prolyl cis-trans isomerase B
b2899	0.266666	6.92261	4.56631	0.0017349	0.00511635	-2.82739	yqfA	hemolysin-III family protein
b1640	0.57932	4.43573	4.56483	0.0017383	0.00512292	-2.37079	anmK	anhydro-N-acetylmuramic acid kinase
b2976	0.396888	4.35358	4.56191	0.00174509	0.00513945	-2.35895	glcB	malate synthase G
b3396	-0.290827	6.45859	-4.5612	0.00174675	0.00514045	-2.76431	mrcA	peptidoglycan glycosyltransferase/peptidoglycan DD-transpeptidase MrcA
b0624	-0.469641	3.55769	-4.56075	0.0017478	0.00514045	-2.15576	crcB	F(-) channel
b3898	0.641045	2.78491	4.55253	0.00176708	0.00519363	-1.95889	frvX	peptidase M42 family protein
b3508	-1.55598	0.0750238	-4.54607	0.00178238	0.00523505	-1.18124	yhiD	inner membrane protein YhiD
b2256	-0.490406	4.36428	-4.54477	0.00178548	0.00524061	-2.37949	arnD	putative 4-deoxy-4-formamido-L-arabinose-phosphoundecaprenol deformylase ArnD
b4680	-0.989332	2.05728	-4.54067	0.0017953	0.0052659	-1.7387	ypdK	putative membrane protein YpdK
b3606	-0.410107	4.38463	-4.53821	0.00180121	0.00527966	-2.39541	trmL	tRNA (cytidine/uridine-2'-O)-ribose methyltransferase
b2689	-0.260379	6.59007	-4.53342	0.00181279	0.00530903	-2.82523	yqaA	DedA family protein YqaA
b0399	0.332817	5.63293	4.53306	0.00181368	0.00530903	-2.66643	phoB	DNA-binding transcriptional dual regulator PhoB
b1130	0.36428	5.97722	4.52766	0.00182683	0.00534394	-2.73444	phoP	DNA-binding transcriptional dual regulator PhoP
b2929	0.341844	5.03832	4.52411	0.00183551	0.00536573	-2.56243	fumE	fumarase E
b1260	0.328414	5.19232	4.5196	0.00184664	0.00539462	-2.60101	trpA	tryptophan synthase subunit alpha
b2402	-0.755052	7.23844	-4.51891	0.00184835	0.005396	-2.93172	valX	tRNA-Val
b3423	-0.299998	6.43914	-4.51569	0.00185634	0.00541568	-2.82689	glpR	DNA-binding transcriptional repressor GlpR
b3528	-0.300897	5.652	-4.50648	0.00187942	0.00547932	-2.70616	dctA	C4 dicarboxylate/orotate:H(+) symporter
b0753	0.861587	1.57149	4.50272	0.00188892	0.00550333	-1.66729	ybgS	PF13985 family protein YbgS
b4244	-0.646869	2.75352	-4.50115	0.00189292	0.00551128	-2.01502	pyrI	aspartate carbamoyltransferase%2C PyrI subunit
b0049	-0.244656	6.52085	-4.49993	0.00189602	0.00551662	-2.86317	apaH	diadenosine tetraphosphatase
b3659	-1.05575	1.0713	-4.49194	0.00191649	0.00557215	-1.51823	setC	putative arabinose exporter
b4265	0.449061	3.95379	4.49148	0.00191767	0.00557215	-2.36454	idnT	L-idonate/5-ketogluconate/gluconate transporter
b3035	0.20752	9.38283	4.49015	0.00192109	0.00557835	-3.14242	tolC	outer membrane channel TolC
b1446	-0.343646	5.83896	-4.48564	0.00193279	0.00560858	-2.76947	ydcY	DUF2526 domain-containing protein YdcY
b1823	0.190863	9.7294	4.48317	0.00193923	0.00562351	-3.14737	cspC	stress protein%2C member of the CspA family
b0052	0.19309	8.12506	4.47955	0.00194868	0.00564713	-3.10058	pdxA	4-hydroxythreonine-4-phosphate dehydrogenase
b2266	0.413517	4.02235	4.47231	0.00196778	0.00569869	-2.40983	elaB	tail anchored inner membrane protein
b0474	-0.193571	8.68037	-4.46909	0.00197632	0.00571962	-3.16136	adk	adenylate kinase
b0918	0.340138	6.31075	4.46403	0.00198987	0.00575498	-2.88296	kdsB	3-deoxy-manno-octulosonate cytidylyltransferase
b1797	-2.12093	-0.657902	-4.46324	0.00199198	0.00575726	-1.14236	yeaR	DUF1971 domain-containing protein YeaR
b4167	0.292312	5.91201	4.46185	0.0019957	0.00576065	-2.81899	nnr	NAD(P)HX epimerase/NAD(P)HX dehydratase
b2324	-0.285694	6.08006	-4.46182	0.00199581	0.00576065	-2.84625	mnmC	fused 5-methylaminomethyl-2-thiouridine-forming methyltransferase and FAD-dependent demodification enzyme
b1443	-1.14823	0.894678	-4.45858	0.00200455	0.00578176	-1.51555	ydcV	putative ABC transporter membrane subunit YdcV
b3086	-0.601514	2.58332	-4.45812	0.00200578	0.00578176	-2.03013	ygjQ	DUF218 domain-containing protein YgjQ
b3829	0.465226	3.92039	4.45478	0.00201483	0.0058036	-2.40907	metE	cobalamin-independent homocysteine transmethylase
b2732	0.897979	1.60125	4.45434	0.00201603	0.0058036	-1.74388	ygbA	protein YgbA
b1914	-0.253397	6.80274	-4.44636	0.00203788	0.00586261	-2.98323	uvrY	DNA-binding transcriptional activator UvrY
b3608	0.248368	8.47437	4.44343	0.00204596	0.00588197	-3.18668	gpsA	glycerol-3-phosphate dehydrogenase
b0916	-0.320838	4.96946	-4.44206	0.00204974	0.00588892	-2.66451	ycaQ	winged helix DNA-binding domain-containing protein YcaQ
b1464	0.318035	5.52227	4.43243	0.00207661	0.00596218	-2.79228	yddE	PF02567 family protein YddE
b4226	-0.193014	10.1054	-4.42536	0.00209657	0.00601553	-3.22668	ppa	inorganic pyrophosphatase
b3518	-0.517364	3.59693	-4.41867	0.00211565	0.00606625	-2.37015	ccp	cytochrome c peroxidase
b3090	-0.60545	2.49809	-4.41583	0.00212382	0.00608568	-2.06684	ygjV	inner membrane protein
b3985	-0.203185	13.1272	-4.41418	0.00212857	0.00609527	-3.20665	rplJ	50S ribosomal subunit protein L10
b1236	0.194631	8.63792	4.40982	0.00214119	0.00612735	-3.24729	galU	UTP--glucose-1-phosphate uridylyltransferase
b4147	-0.195216	9.62483	-4.4051	0.00215494	0.00616264	-3.26293	efp	protein chain elongation factor EF-P
b3247	0.198095	7.77613	4.40413	0.00215778	0.0061667	-3.17022	rng	RNase G
b3856	0.548743	2.85128	4.39646	0.00218036	0.00622714	-2.20577	mobB	molybdopterin-guanine dinucleotide biosynthesis adaptor protein
b1266	-0.27506	5.78796	-4.39059	0.00219784	0.00627293	-2.89977	yciV	RNA/ssDNA 5'->3' exonuclease
b2988	-0.244522	6.46464	-4.39009	0.00219931	0.00627301	-3.01446	gss	fused glutathionylspermidine amidase/glutathionylspermidine synthetase
b3097	0.278595	7.40917	4.38737	0.00220747	0.00629216	-3.15003	yqjC	DUF1090 domain-containing protein YqjC
b2007	0.237776	7.48506	4.38428	0.00221676	0.0063145	-3.16387	yeeX	DUF496 domain-containing protein YeeX
b0184	-0.184107	9.50997	-4.38368	0.00221856	0.00631548	-3.29597	dnaE	DNA polymerase III subunit alpha
b3726	0.363655	5.65026	4.38231	0.00222272	0.00632318	-2.88882	pstA	phosphate ABC transporter membrane subunit PstA
b2133	0.244923	6.90945	4.37091	0.00225748	0.00641785	-3.11005	dld	D-lactate dehydrogenase
b4481	-0.261741	6.11457	-4.36606	0.00227242	0.00645612	-2.99223	rffT	4-acetamido-4%2C6-dideoxy-D-galactose transferase
b2513	0.232048	8.36471	4.3645	0.00227728	0.00646568	-3.2929	yfgM	ancillary SecYEG translocon subunit
b0071	0.55724	3.42527	4.35366	0.00231117	0.00655763	-2.42585	leuD	3-isopropylmalate dehydratase subunit LeuD
b0397	0.290507	5.98816	4.35185	0.0023169	0.00656958	-2.99303	sbcC	ATP dependent%2C structure specific DNA nuclease - SbcC subunit
b0310	-0.910219	1.24513	-4.34649	0.00233392	0.00661352	-1.78289	ykgH	uncharacterized protein YkgH
b4657	-2.26904	-1.29649	-4.34114	0.00235102	0.00665765	-1.21885	yjhZ	KpLE2 phage-like element%3B putative acetyltransferase YjhZ
b3535	-0.43006	3.77775	-4.33974	0.00235554	0.0066661	-2.53578	yhjR	PF10945 family protein YhjR
b1089	-0.18129	11.2152	-4.33621	0.00236693	0.00669398	-3.34836	rpmF	50S ribosomal subunit protein L32
b2255	-0.270982	5.60632	-4.32481	0.00240411	0.00679469	-2.96359	arnA	fused UDP-4-amino-4-deoxy-L-arabinose formyltransferase/UDP-glucuronate dehydrogenase
b4542	-0.82836	3.78572	-4.3229	0.00241041	0.00680809	-2.54921	yohO	UPF0387 family protein YohO
b1930	-0.667782	2.49945	-4.31976	0.0024208	0.00683108	-2.20485	yedF	putative sulfurtransferase YedF
b3321	-0.242256	12.344	-4.31949	0.0024217	0.00683108	-3.36092	rpsJ	30S ribosomal subunit protein S10
b2326	0.224119	6.76004	4.31695	0.00243015	0.00685046	-3.16877	epmC	EF-P-Lys34 hydroxylase
b3484	-0.739142	1.87691	-4.31161	0.00244799	0.00689627	-2.02844	yhhI	putative transposase
b0380	0.666623	3.02456	4.31002	0.00245333	0.00690686	-2.37808	yaiZ	DUF2754 domain-containing protein YaiZ
b1711	-0.31292	5.53353	-4.29314	0.00251081	0.0070641	-2.99636	btuC	vitamin B12 ABC transporter membrane subunit
b2369	-0.381346	5.05555	-4.29027	0.00252071	0.00708735	-2.90438	evgA	DNA-binding transcriptional activator EvgA
b1908	-0.222046	6.74366	-4.28702	0.00253202	0.00711454	-3.2091	yecA	UPF0149 family protein YecA
b2234	-0.196001	8.72614	-4.27996	0.0025567	0.00717215	-3.44159	nrdA	ribonucleoside-diphosphate reductase 1 subunit alpha
b1891	-1.27384	0.631422	-4.27917	0.00255947	0.00717215	-1.69855	flhC	DNA-binding transcriptional dual regulator FlhC
b1067	0.326829	5.00205	4.27916	0.00255952	0.00717215	-2.91318	yceH	DUF480 domain-containing protein YceH
b0993	-0.453694	3.56663	-4.27902	0.00256	0.00717215	-2.56922	torS	sensory histidine kinase TorS
b1087	0.437246	3.83203	4.2788	0.00256077	0.00717215	-2.64517	yceF	m(7)GTP pyrophosphatase
b0119	-0.277902	5.61699	-4.27813	0.00256314	0.00717416	-3.03447	yacL	UPF0231 family protein YacL
b3780	0.183789	10.0323	4.27223	0.00258404	0.00722798	-3.45283	rhlB	ATP-dependent RNA helicase RhlB
b4452	-1.47235	-0.140912	-4.2704	0.00259055	0.00724153	-1.52832	gadY	small regulatory RNA GadY
b3755	0.330738	6.04789	4.26849	0.00259737	0.00725593	-3.12612	yieP	putative transcriptional regulator YieP
b1375	-0.410691	5.83992	-4.26578	0.00260707	0.00727836	-3.09131	ynaE	Rac prophage%3B uncharacterized protein YnaE
b4491	-0.405308	3.94362	-4.26501	0.00260984	0.0072814	-2.68889	ycgH	putative transporter component%2C N-terminal fragment
b3629	-0.341985	5.96324	-4.26271	0.00261814	0.00729988	-3.11829	waaS	lipopolysaccharide core biosynthesis protein
b2284	-0.277048	6.71228	-4.25955	0.00262956	0.00732587	-3.24455	nuoF	NADH:quinone oxidoreductase subunit F
b0414	0.218558	7.43123	4.2592	0.00263084	0.00732587	-3.34186	ribD	fused diaminohydroxyphosphoribosylaminopyrimidine deaminase/5-amino-6-(5-phosphoribosylamino)uracil reductase
b0604	0.352225	5.12242	4.25821	0.00263443	0.00733117	-2.96921	dsbG	protein sulfenic acid reductase DsbG
b3779	0.181178	9.80007	4.25671	0.00263989	0.00734167	-3.47902	gpp	guanosine-5'-triphosphate%2C3'-diphosphate phosphatase
b2282	-0.269503	6.61357	-4.25277	0.00265424	0.00737686	-3.23992	nuoH	NADH:quinone oxidoreductase subunit H
b1261	0.326294	5.33428	4.25216	0.00265648	0.00737837	-3.02129	trpB	tryptophan synthase subunit beta
b0141	-0.781963	2.34123	-4.24652	0.00267723	0.00743124	-2.26015	yadN	putative fimbrial protein YadN
b3189	0.174755	9.12423	4.24532	0.00268168	0.00743884	-3.50409	murA	UDP-N-acetylglucosamine 1-carboxyvinyltransferase
b4639	-1.53978	-0.586243	-4.23878	0.002706	0.00750082	-1.48672
b0611	0.26841	6.19028	4.23839	0.00270748	0.00750082	-3.19502	rna	RNase I
b0219	0.298043	5.31742	4.23389	0.00272435	0.00754276	-3.04524	yafV	2-oxoglutaramate amidase
b3130	-0.422402	3.63909	-4.22932	0.00274162	0.00758573	-2.66258	yhaV	ribosome-dependent mRNA interferase toxin YhaV
b0913	-0.40227	4.35313	-4.22883	0.00274348	0.00758606	-2.84156	ycaI	conserved inner membrane protein YcaI
b0813	-0.343766	4.84602	-4.22665	0.00275175	0.00760406	-2.95528	rhtA	L-threonine/L-homoserine exporter
b0576	-0.246652	6.95232	-4.22532	0.00275683	0.00761327	-3.32989	pheP	phenylalanine:H(+) symporter PheP
b4742	-0.825584	1.66842	-4.22463	0.00275946	0.00761372	-2.08941	ymjE	protein YmjE
b1050	-0.522133	3.09698	-4.22436	0.0027605	0.00761372	-2.52079	yceK	DUF1375 domain-containing lipoprotein YceK
b2947	0.213469	7.13607	4.2036	0.00284101	0.0078308	-3.38764	gshB	glutathione synthetase
b2568	-0.180656	8.55529	-4.19636	0.00286967	0.00790479	-3.55585	lepB	signal peptidase I
b0231	0.314742	4.77556	4.19505	0.00287492	0.00791422	-2.98991	dinB	DNA polymerase IV
b1794	-0.301574	5.97826	-4.19061	0.00289267	0.00795805	-3.22845	dgcP	diguanylate cyclase DgcP
b2835	0.389309	6.40098	4.1823	0.00292628	0.00804163	-3.31286	lplT	lysophospholipid transporter
b4707	0.25829	5.91009	4.18218	0.00292675	0.00804163	-3.23114	esrE	small RNA EsrE
b0552	0.8449	1.42073	4.17694	0.00294817	0.00809535	-2.09687	insH-2	DLP12 prophage%3B IS5 transposase and trans-activator
b2399	-0.297222	5.25377	-4.17467	0.00295748	0.0081158	-3.11784	yfeD	putative DNA-binding transcriptional regulator YfeD
b0610	-0.225851	6.47956	-4.17074	0.00297368	0.00815509	-3.34173	rnk	nucleoside diphosphate kinase regulator
b2143	-0.460172	5.62427	-4.15705	0.00303089	0.00830674	-3.21361	cdd	cytidine/deoxycytidine deaminase
b3010	0.457521	3.25867	4.15376	0.00304482	0.00833966	-2.67766	yqhC	DNA-binding transcriptional activator YqhC
b1135	-0.28008	5.42344	-4.1512	0.00305572	0.00836374	-3.18675	rluE	23S rRNA pseudouridine(2457) synthase
b3891	-0.178002	8.59509	-4.15079	0.00305746	0.00836374	-3.62662	fdhE	formate dehydrogenase formation protein
b1018	-0.38208	4.69969	-4.14227	0.00309401	0.00845838	-3.04882	efeO	ferrous iron transport system protein EfeO
b1049	0.179057	9.77493	4.13712	0.00311636	0.00851412	-3.65783	opgH	osmoregulated periplasmic glucans (OPGs) biosynthesis protein H
b2952	0.206841	6.94011	4.1343	0.00312863	0.00854228	-3.46549	yggT	uncharacterized protein YggT
b0457	0.279123	6.47627	4.125	0.00316954	0.00864855	-3.41126	pdeB	c-di-GMP phosphodiesterase PdeB
b4517	-0.290375	5.98472	-4.12218	0.00318208	0.0086773	-3.33208	gnsA	putative phosphatidylethanolamine synthesis regulator GnsA
b2684	-0.194494	7.71055	-4.11777	0.00320179	0.00872076	-3.58653	mprA	DNA-binding transcriptional repressor MprA
b4108	0.325833	4.6326	4.11771	0.00320203	0.00872076	-3.07469	yjdM	conserved protein YjdM
b1954	-1.01849	1.524	-4.11281	0.00322409	0.00877534	-2.20228	dsrA	small regulatory RNA DsrA
b4724	0.31432	6.90291	4.1053	0.00325815	0.00886251	-3.50371	ynfQ	Qin prophage%3B protein YnfQ
b1040	-0.672863	1.99595	-4.09928	0.00328574	0.00893195	-2.38124	csgD	DNA-binding transcriptional dual regulator CsgD
b4211	-0.315974	4.79419	-4.09658	0.00329823	0.00896029	-3.13887	qorB	NAD(P)H:quinone oxidoreductase
b3087	0.282985	5.62468	4.08886	0.00333414	0.00905219	-3.32064	ygjR	putative oxidoreductase YgjR
b0109	-0.250586	6.80841	-4.08832	0.00333669	0.00905344	-3.51479	nadC	quinolinate phosphoribosyltransferase (decarboxylating)
b3342	-0.225735	11.8276	-4.08163	0.00336815	0.00913311	-3.72237	rpsL	30S ribosomal subunit protein S12
b1412	0.336534	4.38307	4.07674	0.00339136	0.0091903	-3.08076	azoR	FMN dependent NADH:quinone oxidoreductase
b2535	-0.491719	3.25567	-4.06885	0.00342917	0.00928697	-2.79771	csiE	stationary phase inducible protein CsiE
b0629	-0.604375	2.6686	-4.06486	0.0034485	0.00933351	-2.63425	ybeF	putative LysR-type DNA-binding transcriptional regulator YbeF
b1426	0.419717	4.45307	4.06229	0.00346097	0.00936143	-3.11766	ydcH	protein YdcH
b3325	-0.453632	3.20567	-4.06001	0.00347211	0.00938573	-2.7981	gspD	Type II secretion system protein GspD
b1273	0.234161	6.40321	4.05361	0.00350353	0.00946476	-3.50708	yciN	protein YciN
b3360	-0.650621	2.77756	-4.05278	0.00350764	0.00946997	-2.68259	pabA	aminodeoxychorismate synthase subunit 2
b3849	0.220319	7.58814	4.05173	0.00351279	0.009478	-3.67164	trkH	K(+) transporter TrkH
b3989	-0.416392	3.49615	-4.04299	0.00355633	0.0095895	-2.90342	yjaZ	conserved protein YjaZ
b3880	0.948818	0.842201	4.03476	0.00359787	0.0096955	-2.1362	yihS	sulfoquinovose isomerase
b3615	-0.48125	3.43885	-4.03349	0.00360435	0.00970444	-2.90067	waaH	UDP-glucuronate:LPS(HepIII) glycosyltransferase
b0915	-0.199122	7.17797	-4.03323	0.00360566	0.00970444	-3.64805	lpxK	tetraacyldisaccharide 4'-kinase
b3782	-0.307134	8.51542	-4.01656	0.00369156	0.0099295	-3.82169	rhoL	rho operon leader peptide
b1760	0.847067	1.4166	4.01609	0.003694	0.00992992	-2.33374	ynjH	DUF1496 domain-containing protein YnjH
b4479	0.552992	3.27358	4.01474	0.00370108	0.00994279	-2.88874	dgoR	putative DNA-binding transcriptional regulator DgoR
b2753	-0.257898	6.22752	-4.01424	0.00370369	0.00994367	-3.53614	iap	alkaline phosphatase isozyme conversion protein
b1809	0.310834	6.31256	4.01375	0.00370628	0.00994447	-3.55237	yoaB	RutC family protein YoaB
b0542	-0.571514	2.43713	-4.01261	0.00371227	0.00994905	-2.64713	renD	DLP12 prophage%3B protein RenD
b3749	0.305969	6.92682	4.01244	0.00371313	0.00994905	-3.64712	rbsA	ribose ABC transporter ATP binding subunit
b3693	0.685177	2.44592	4.01211	0.00371486	0.00994905	-2.65651	dgoK	2-dehydro-3-deoxygalactonokinase
b3290	-0.213293	7.41029	-4.007	0.00374184	0.0100151	-3.71699	trkA	NAD-binding component of Trk potassium transporters
b0924	0.177467	9.64511	4.00114	0.00377302	0.0100924	-3.86498	mukB	chromosome partitioning protein MukB
b0528	-0.327846	4.79402	-3.99845	0.00378741	0.0101202	-3.28678	ybcJ	putative RNA-binding protein YbcJ
b1651	0.2878	6.13578	3.99832	0.0037881	0.0101202	-3.54629	gloA	glyoxalase I
b2504	-0.317777	5.88662	-3.99518	0.00380495	0.0101586	-3.50649	yfgG	protein YfgG
b1810	-0.474103	3.72255	-3.99478	0.00380714	0.0101586	-3.03466	yoaC	DUF1889 domain-containing protein YoaC
b0244	-0.485869	3.21864	-3.99399	0.00381141	0.0101637	-2.90054	thrW	tRNA-Thr
b1580	-1.43307	-0.370364	-3.9866	0.00385155	0.0102645	-1.89332	rspB	putative zinc-binding dehydrogenase RspB
b3991	0.603344	2.36902	3.98547	0.00385769	0.0102746	-2.67601	thiG	1-deoxy-D-xylulose 5-phosphate:thiol sulfurtransferase
b1976	0.43477	3.73384	3.98448	0.00386314	0.0102828	-3.06017	mtfA	Mlc titration factor
b1764	0.225535	7.74903	3.98204	0.00387655	0.0103121	-3.79679	selD	selenide%2C water dikinase
b2342	0.491684	3.2293	3.98156	0.00387914	0.0103127	-2.92776	fadI	3-ketoacyl-CoA thiolase FadI
b4347	-0.4197	3.75711	-3.97835	0.00389687	0.0103492	-3.07025	symE	toxic protein SymE
b4251	0.404959	4.53528	3.97801	0.00389875	0.0103492	-3.26357	bdcR	putative transcriptional regulator BdcR
b4696	0.541472	2.50912	3.97779	0.0039	0.0103492	-2.72975	yneO	AIDA-I family autotransporter YneO
b0760	0.247601	6.2802	3.97505	0.0039152	0.0103832	-3.60584	modF	ABC family protein ModF
b3363	0.251485	6.2958	3.97213	0.00393146	0.0104199	-3.61287	ppiA	peptidyl-prolyl cis-trans isomerase A
b2397	-1.1085	2.75483	-3.9665	0.00396302	0.0104972	-2.78396	alaW	tRNA-Ala
b1636	-0.217893	6.54891	-3.96535	0.00396949	0.0105079	-3.66248	pdxY	pyridoxal kinase 2
b4131	0.394072	4.23524	3.95916	0.00400458	0.0105926	-3.22392	cadA	lysine decarboxylase 1
b0931	0.173173	8.44282	3.95885	0.00400636	0.0105926	-3.90677	pncB	nicotinate phosphoribosyltransferase
b2351	-0.330206	7.57062	-3.95661	0.00401912	0.0106199	-3.81285	yfdH	CPS-53 (KpLE1) prophage%3B bactoprenol glucosyl transferase
b4403	-0.2902	4.89666	-3.94405	0.00409165	0.010805	-3.39179	yjtD	putative rRNA methyltransferase
b3497	0.339987	5.68164	3.94216	0.00410268	0.0108275	-3.55271	rsmJ	16S rRNA m(2)G1516 methyltransferase
b0752	0.411633	3.48555	3.93788	0.00412778	0.0108871	-3.06509	zitB	Zn(2(+))/Cd(2(+))/Ni(2(+))/Cu(2(+)) exporter
b1741	0.316758	4.75603	3.93318	0.00415553	0.0109536	-3.38038	cho	endonuclease of nucleotide excision repair
b4117	-0.515268	2.99315	-3.9326	0.00415896	0.010956	-2.92955	adiA	arginine decarboxylase%2C degradative
b0537	0.259375	6.73417	3.92854	0.00418309	0.0110129	-3.74791	intD	DLP12 prophage%3B putative integrase
b0409	0.235895	9.11411	3.92759	0.00418873	0.0110164	-3.98248	secF	Sec translocon accessory complex subunit SecF
b0882	0.334775	8.4982	3.92747	0.00418949	0.0110164	-3.95859	clpA	ATP-dependent Clp protease ATP-binding subunit ClpA
b3239	-1.4383	0.0256942	-3.92412	0.00420955	0.0110625	-2.0678	yhcO	putative barnase inhibitor
b1461	0.495263	2.7618	3.91825	0.00424496	0.0111474	-2.89386	pptA	putative 4-oxalocrotonate tautomerase (4-OT)
b2301	0.344028	4.21491	3.91792	0.00424699	0.0111474	-3.28223	yfcF	glutathione S-transferase YfcF
b2512	0.237628	9.60387	3.91658	0.00425512	0.011162	-3.99433	bamB	outer membrane protein assembly factor BamB
b1205	0.493155	2.9964	3.91604	0.0042584	0.0111638	-2.96306	ychH	stress-induced protein
b0250	0.400867	3.9977	3.91381	0.004272	0.0111927	-3.23545	ykfB	CP4-6 prophage%3B protein YkfB
b3631	-0.254475	6.89031	-3.91318	0.00427584	0.0111961	-3.7919	waaG	lipopolysaccharide glucosyltransferase I
b4346	-0.385985	5.85513	-3.91038	0.00429298	0.0112342	-3.62919	mcrB	5-methylcytosine-specific restriction enzyme subunit McrB
b3319	-0.249687	12.6683	-3.9084	0.00430512	0.0112591	-3.97311	rplD	50S ribosomal subunit protein L4
b1765	0.540292	5.74191	3.90747	0.00431084	0.0112673	-3.6148	ydjA	putative oxidoreductase
b1088	-0.168713	11.6481	-3.90477	0.00432754	0.0113042	-3.99268	yceD	DUF177 domain-containing protein YceD
b2173	-0.229975	5.94951	-3.90399	0.00433236	0.01131	-3.65696	yeiR	zinc-binding GTPase YeiR
b4061	-0.418023	3.42855	-3.9018	0.00434593	0.0113386	-3.09929	pdeC	c-di-GMP phosphodiesterase PdeC
b2806	-0.445723	7.19237	-3.89765	0.00437184	0.0113993	-3.85458	rlmM	23S rRNA 2'-O-ribose C2498 methyltransferase
b4544	-0.699078	1.64755	-3.896	0.00438217	0.0114194	-2.57928	arnE	undecaprenyl-phosphate-alpha-L-Ara4N flippase - ArnE subunit
b3391	0.5649	2.27001	3.89425	0.00439316	0.0114412	-2.78538	hofQ	DNA utilization protein HofQ
b0981	0.369659	4.39475	3.89327	0.00439929	0.0114503	-3.36129	etk	protein-tyrosine kinase Etk
b4406	0.488993	5.28435	3.88829	0.00443078	0.0115253	-3.55831	yaeP	UPF0253 family protein YaeP
b0034	-0.509681	2.64919	-3.87962	0.00448621	0.0116625	-2.9123	caiF	DNA-binding transcriptional activator CaiF
b3731	-0.176493	10.2213	-3.87629	0.00450768	0.0117113	-4.04778	atpC	ATP synthase F1 complex subunit epsilon
b1218	0.437369	4.38863	3.87005	0.00454815	0.0118094	-3.39477	chaC	glutathione-specific gamma-glutamylcyclotransferase
b1139	-0.400836	3.5354	-3.86827	0.00455982	0.0118298	-3.1794	lit	e14 prophage%3B cell death peptidase Lit
b1749	-0.253566	6.69481	-3.86802	0.00456144	0.0118298	-3.83283	xthA	exodeoxyribonuclease III
b2365	0.583361	2.20979	3.86351	0.00459111	0.0118996	-2.81359	dsdX	D-serine transporter
b0787	-0.649255	1.97169	-3.86127	0.00460583	0.0119307	-2.73341	ybhM	Bax1-I family protein YbhM
b1766	0.178075	7.80241	3.86083	0.00460878	0.0119312	-3.98833	sppA	protease IV%2C a signal peptide peptidase
b1981	0.274181	5.9939	3.8572	0.00463288	0.0119864	-3.7374	shiA	shikimate:H(+) symporter
b0992	-0.916089	0.882209	-3.85281	0.00466217	0.012055	-2.41052	yccM	putative 4Fe-4S membrane protein
b4725	0.33092	4.55145	3.84445	0.00471854	0.0121935	-3.47141	rseD	rpoE leader peptide
b4581	-0.334953	4.38255	-3.84392	0.00472216	0.0121956	-3.43067	ybeM	deamidated glutathione amidase%2C N-terminal fragment
b1391	2.07261	-2.30744	3.8401	0.00474816	0.0122555	-1.85524	paaD	phenylacetate degradation protein
b3909	-0.311971	4.529	-3.83381	0.00479138	0.0123514	-3.47985	kdgT	2-dehydro-3-deoxy-D-gluconate:H(+) symporter
b3940	0.184902	7.80306	3.83357	0.00479303	0.0123514	-4.03026	metL	fused aspartate kinase/homoserine dehydrogenase 2
b3031	-0.204731	6.5368	-3.8334	0.00479418	0.0123514	-3.86241	yqiA	esterase YqiA
b3197	0.208513	7.0643	3.83304	0.0047967	0.0123514	-3.9395	kdsD	D-arabinose 5-phosphate isomerase KdsD
b0950	-0.203939	7.18516	-3.8326	0.00479972	0.0123519	-3.95488	pqiA	intermembrane transport protein PqiA
b1495	0.552278	2.38642	3.82971	0.00481976	0.0123961	-2.91878	yddB	putative TonB-dependent receptor
b4045	-0.269646	5.07372	-3.82794	0.00483207	0.0124204	-3.6068	yjbJ	putative stress response protein
b1107	0.242662	6.66706	3.82551	0.00484897	0.0124565	-3.89588	nagZ	beta-N-acetylhexosaminidase
b3234	0.276764	5.76049	3.82503	0.00485233	0.0124578	-3.74634	degQ	periplasmic serine endoprotease
b2125	-0.41035	3.5007	-3.82441	0.00485672	0.0124617	-3.23699	btsR	DNA-binding transcriptional activator BtsR
b1086	-0.169801	8.17314	-3.8228	0.00486798	0.0124832	-4.08823	rluC	23S rRNA pseudouridine(955/2504/2580) synthase
b2941	-1.02237	0.513229	-3.8211	0.00487989	0.0125063	-2.3555	yqgD	DUF2684 domain-containing protein YqgD
b0031	0.343982	5.87291	3.80976	0.00496039	0.0127052	-3.78913	dapB	4-hydroxy-tetrahydrodipicolinate reductase
b2150	-0.458844	4.7444	-3.80878	0.00496745	0.0127157	-3.56361	mglB	D-galactose/methyl-galactoside ABC transporter periplasmic binding protein
b0114	0.237886	12.7895	3.79984	0.00503199	0.0128734	-4.13757	aceE	pyruvate dehydrogenase E1 component
b0194	-0.163689	9.9107	-3.79916	0.00503689	0.0128783	-4.17	proS	proline--tRNA ligase
b4476	-0.332999	5.44887	-3.79686	0.00505367	0.0129099	-3.72914	gntU	low-affinity gluconate transporter
b2099	0.305328	4.47299	3.79666	0.00505518	0.0129099	-3.52764	yegU	putative ADP-ribosylglycohydrolase YegU
b4702	-1.45837	1.10422	-3.79334	0.00507946	0.0129643	-2.53534	mgtL	leader peptide MgtL
b0095	0.184367	8.8641	3.79182	0.00509063	0.0129851	-4.18707	ftsZ	cell division protein FtsZ
b3630	-0.27254	6.04547	-3.78931	0.00510911	0.013022	-3.84913	waaP	lipopolysaccharide core heptose (I) kinase
b1781	-0.266704	5.47936	-3.78905	0.00511107	0.013022	-3.74804	yeaE	methylglyoxal reductase YeaE
b2866	-0.454329	3.118	-3.78641	0.00513059	0.0130641	-3.19001	xdhA	putative xanthine dehydrogenase molybdenum-binding subunit XdhA
b2289	0.268351	5.74197	3.78083	0.00517223	0.0131624	-3.81113	lrhA	DNA-binding transcriptional dual regulator LrhA
b0687	0.181708	7.88334	3.7799	0.00517919	0.0131724	-4.12249	seqA	SeqA%2C negative modulator of initiation of replication
b0654	-0.358782	4.92557	-3.77524	0.00521424	0.0132537	-3.6557	gltJ	glutamate/aspartate ABC transporter membrane subunit GltJ
b3610	0.254498	7.19744	3.77475	0.00521794	0.0132554	-4.04635	grxC	glutaredoxin 3
b3680	0.735202	1.39767	3.77047	0.00525037	0.01333	-2.70351	yidL	putative DNA-binding transcriptional regulator YidL
b4137	0.343173	4.51827	3.76816	0.005268	0.0133669	-3.58137	cutA	copper binding protein CutA
b4088	-0.575125	2.3955	-3.76103	0.00532277	0.013498	-3.0174	alsB	D-allose ABC transporter periplasmic binding protein
b3345	0.212047	6.19458	3.76029	0.00532843	0.0135045	-3.92069	tusD	sulfurtransferase complex subunit TusD
b2887	0.528184	2.43365	3.7587	0.00534073	0.0135278	-3.04212	ygfT	fused putative oxidoreductase%2C Fe-S subunit and nucleotide-binding subunit
b4736	-0.3285	5.7305	-3.7582	0.00534463	0.0135298	-3.84155	yliM	protein YliM
b2593	-0.197542	7.38409	-3.755	0.00536952	0.0135849	-4.09962	pgeF	polyphenol oxidase YfiH
b0139	-0.655292	2.63214	-3.75149	0.00539691	0.0136462	-3.09775	htrE	putative fimbrial usher protein HtrE
b4373	-0.225648	6.24559	-3.75049	0.00540471	0.013658	-3.94303	rimI	ribosomal-protein-S18-alanine N-acetyltransferase
b3964	0.192621	7.2995	3.74147	0.00547603	0.0138302	-4.1107	yijD	conserved inner membrane protein YijD
b1644	-0.315667	4.2057	-3.74101	0.00547969	0.0138314	-3.54799	ydhJ	putative membrane fusion protein YdhJ
b1961	-0.217348	6.41775	-3.73669	0.00551416	0.0139103	-3.99258	dcm	DNA-cytosine methyltransferase
b3951	0.498972	2.68632	3.73109	0.00555922	0.0140158	-3.15844	pflD	putative formate acetyltransferase 2
b1057	0.310193	4.29066	3.7227	0.0056275	0.0141797	-3.60019	yceJ	putative cytochrome b561
b4206	0.211895	6.17967	3.72186	0.00563442	0.0141889	-3.97762	ytfB	cell division protein YtfB
b0684	0.206712	8.42853	3.71761	0.00566937	0.0142687	-4.27616	fldA	flavodoxin 1
b1709	-0.377417	4.68651	-3.71323	0.00570568	0.0143517	-3.6998	btuD	vitamin B12 ABC transporter ATP binding subunit
b4272	-1.21675	0.689306	-3.7101	0.00573175	0.014409	-2.56092	insC-6	KpLE2 phage-like element%3B IS2 insertion element repressor InsA
b1065	-0.508229	3.46534	-3.70882	0.00574244	0.0144275	-3.40303	mdtH	multidrug efflux pump MdtH
b1118	0.165831	8.05106	3.70815	0.00574807	0.0144333	-4.253	lolE	lipoprotein release complex - inner membrane subunit
b3190	0.246876	6.59723	3.70468	0.00577724	0.0144956	-4.07189	ibaG	acid stress protein IbaG
b4112	0.286573	5.24743	3.7044	0.00577954	0.0144956	-3.83564	basS	sensory histidine kinase BasS
b1819	0.237109	7.10791	3.7004	0.00581333	0.0145719	-4.14995	manZ	mannose-specific PTS enzyme IID component
b4136	0.20444	6.4587	3.69626	0.00584856	0.0146518	-4.06324	dsbD	protein disulfide oxidoreductase - DsbDreduced
b1020	-0.41663	3.56996	-3.69439	0.00586453	0.0146833	-3.4557	phoH	ATP-binding protein PhoH
b3986	-0.177992	12.9299	-3.69254	0.00588044	0.0147089	-4.30049	rplL	50S ribosomal subunit protein L12
b1538	0.235619	5.59219	3.69202	0.00588487	0.0147089	-3.92161	dcp	peptidyl-dipeptidase Dcp
b2317	0.363362	5.89059	3.69202	0.00588492	0.0147089	-3.97413	dedA	DedA family protein DedA
b3199	0.280189	7.12189	3.68702	0.005928	0.0148081	-4.17243	lptC	lipopolysaccharide transport system protein LptC
b2847	-0.69939	1.56201	-3.68471	0.00594807	0.0148497	-2.87508	yqeI	putative transcriptional regulator YqeI
b2638	-0.786134	1.18508	-3.6819	0.00597247	0.014902	-2.76242	yfjU	CP4-57 prophage%3B ArsC family protein YfjU
b4585	-1.36202	-0.320351	-3.67936	0.00599467	0.0149488	-2.36074	chiX	small regulatory RNA ChiX
b3979	-0.18414	8.39337	-3.67335	0.00604758	0.0150721	-4.34038	thrT	tRNA-Thr
b0386	0.249041	5.74672	3.67219	0.00605785	0.0150826	-3.98017	proC	pyrroline-5-carboxylate reductase
b1723	0.352556	4.09499	3.67197	0.00605987	0.0150826	-3.63199	pfkB	6-phosphofructokinase II
b1385	-0.33021	4.0124	-3.67152	0.00606383	0.0150826	-3.60809	feaB	phenylacetaldehyde dehydrogenase
b0502	-0.489044	2.88647	-3.67131	0.00606566	0.0150826	-3.3014	ylbG	putative DNA-binding transcriptional regulator YlbG
b1021	-0.551441	2.28854	-3.66766	0.00609819	0.0151548	-3.12994	pgaD	poly-N-acetyl-D-glucosamine synthase subunit PgaD
b3196	0.204269	6.3375	3.66723	0.00610202	0.0151556	-4.08867	yrbG	putative transport protein YrbG
b0781	-0.180555	7.24535	-3.66503	0.00612167	0.0151815	-4.22177	moaA	GTP 3'%2C8'-cyclase
b1830	0.159189	10.2841	3.66502	0.00612176	0.0151815	-4.37322	prc	tail-specific protease
b0873	-0.715619	1.70946	-3.66489	0.00612292	0.0151815	-2.95011	hcp	protein S-nitrosylase
b0526	-0.173831	7.50036	-3.66177	0.00615096	0.0152423	-4.25864	cysS	cysteine--tRNA ligase
b4388	0.194624	6.88329	3.65718	0.00619239	0.0153362	-4.18722	serB	phosphoserine phosphatase
b2105	0.389235	3.91027	3.65613	0.00620198	0.0153512	-3.61025	rcnR	DNA-binding transcriptional repressor RcnR
b0354	-0.246615	5.33337	-3.65471	0.00621482	0.0153742	-3.9278	yaiL	DUF2058 domain-containing protein YaiL
b0957	-0.18162	13.1452	-3.65209	0.00623877	0.0154247	-4.35853	ompA	outer membrane porin A
b2754	0.613323	1.88295	3.65059	0.0062525	0.0154499	-3.04068	cas2	CRISPR-associated endoribonuclease Cas2
b1309	-0.624236	1.8902	-3.64954	0.00626207	0.0154618	-3.03455	ycjM	glucosylglycerate phosphorylase
b0766	-0.331097	4.92964	-3.64901	0.00626699	0.0154618	-3.85243	ybhA	pyridoxal phosphate/fructose-1%2C6-bisphosphate phosphatase
b2054	-0.606736	2.05357	-3.6489	0.00626802	0.0154618	-3.08594	wcaF	putative acyl transferase
b3984	-0.194413	13.1385	-3.64814	0.00627493	0.0154701	-4.36482	rplA	50S ribosomal subunit protein L1
b0401	-0.244587	8.08959	-3.64646	0.00629043	0.0154995	-4.35161	brnQ	branched chain amino acid transporter BrnQ
b2167	0.258299	8.61785	3.64539	0.00630032	0.0155151	-4.40234	fruA	fructose-specific PTS multiphosphoryl transfer protein FruA
b1294	-0.192427	6.60206	-3.64132	0.006338	0.015599	-4.16975	sapA	putative periplasmic binding protein SapA
b1428	0.710485	1.59156	3.64047	0.00634596	0.0156098	-2.96344	ydcK	putative enzyme YdcK
b3434	-0.243277	5.27496	-3.63865	0.00636293	0.0156426	-3.94107	yhgN	putative inner membrane protein
b1793	0.38028	4.05414	3.63804	0.00636857	0.0156477	-3.67423	yoaF	DUF333 domain-containing lipoprotein YoaF
b0078	0.417629	3.26537	3.63633	0.0063846	0.0156782	-3.46856	ilvH	acetolactate synthase/acetohydroxybutanoate synthase%2C regulatory subunit
b1678	0.385854	3.30294	3.6323	0.00642246	0.0157622	-3.48539	ldtE	L%2CD-transpeptidase LdtE
b1960	-0.326909	4.15962	-3.62642	0.00647815	0.0158899	-3.71441	vsr	DNA mismatch endonuclease of the very short patch (VSP) mismatch repair pathway
b2064	-0.164202	7.76577	-3.62496	0.00649208	0.0159066	-4.34819	asmA	putative assembly protein AsmA
b2250	-0.333545	4.76908	-3.62494	0.00649226	0.0159066	-3.85549	yfaZ	putative porin YfaZ
b4536	0.239139	5.27761	3.62322	0.00650866	0.0159378	-3.96811	yobH	protein YobH
b2327	0.190949	6.69114	3.6189	0.00655006	0.0160301	-4.21952	yfcA	conserved inner membrane protein YfcA
b3832	0.243521	6.46635	3.61661	0.00657223	0.0160753	-4.18833	rmuC	putative recombination limiting protein RmuC
b0421	0.199429	7.14202	3.61349	0.00660238	0.01614	-4.2896	ispA	geranyl diphosphate/farnesyl diphosphate synthase
b1195	-1.06814	0.836729	-3.60162	0.00671869	0.0164135	-2.77315	ymgE	PF04226 family protein YmgE
b4445	-0.934546	0.714098	-3.6013	0.00672184	0.0164135	-2.74549	omrB	small regulatory RNA OmrB
b1923	0.272837	4.66231	3.59761	0.00675846	0.0164937	-3.87794	fliC	flagellar filament structural protein
b4478	0.673715	1.90121	3.59469	0.00678758	0.0165551	-3.13047	dgoD	D-galactonate dehydratase
b4477	0.908688	1.40818	3.59432	0.00679126	0.0165551	-2.96983	dgoA	2-dehydro-3-deoxy-6-phosphogalactonate aldolase
b3492	-0.570251	6.26841	-3.59346	0.00679992	0.0165592	-4.18714	yhiN	putative oxidoreductase YhiN
b2239	-0.281469	4.85862	-3.5934	0.00680055	0.0165592	-3.92459	glpQ	glycerophosphoryl diester phosphodiesterase
b0536	-0.519896	3.50012	-3.59283	0.00680623	0.0165637	-3.59193	argU	tRNA-Arg
b2600	-0.237664	6.42857	-3.59087	0.00682594	0.0166024	-4.22088	tyrA	fused chorismate mutase/prephenate dehydrogenase
b1463	1.03015	0.735137	3.58915	0.0068432	0.0166351	-2.77705	nhoA	arylamine N-acetyltransferase
b0340	0.773284	1.57939	3.58813	0.00685347	0.0166507	-3.03775	cynS	cyanase
b2960	-0.229304	6.33987	-3.58536	0.00688154	0.0167096	-4.21518	trmI	tRNA m(7)G46 methyltransferase
b3482	-0.439165	3.02558	-3.58457	0.00688957	0.0167136	-3.47684	rhsB	rhs element protein RhsB
b4380	0.792422	1.69951	3.58444	0.00689091	0.0167136	-3.08164	yjjI	DUF3029 domain-containing protein YjjI
b0579	-0.451116	3.99828	-3.5824	0.00691167	0.0167546	-3.74049	ybdF	PF04237 family protein YbdF
b3994	0.281891	4.85031	3.5812	0.00692389	0.0167749	-3.94402	thiC	phosphomethylpyrimidine synthase
b3320	-0.252484	13.1695	-3.57893	0.00694708	0.0168217	-4.47203	rplC	50S ribosomal subunit protein L3
b4184	-0.888902	0.739413	-3.57283	0.00700989	0.0169571	-2.79794	yjfL	conserved inner membrane protein YjfL
b1856	0.153718	8.54835	3.57274	0.0070108	0.0169571	-4.51146	mepM	peptidoglycan DD-endopeptidase MepM
b3644	-0.159161	8.27932	-3.56662	0.00707444	0.0171015	-4.4965	yicC	UPF0701 family protein YicC
b3896	-0.496494	3.24154	-3.56188	0.00712421	0.0172122	-3.57043	yiiG	DUF3829 domain-containing lipoprotein YiiG
b0263	-0.714167	1.59945	-3.56067	0.00713692	0.0172333	-3.07846	afuB	CP4-6 prophage%3B ABC transporter membrane protein AfuB
b0497	0.312367	4.2627	3.54935	0.00725734	0.0175144	-3.86325	rhsD	protein RhsD
b1134	-0.249637	5.12958	-3.54891	0.00726201	0.0175159	-4.05147	nudJ	phosphatase NudJ
b0057	-0.304508	4.27723	-3.5478	0.00727401	0.0175351	-3.8656	yabQ	protein YabQ
b1237	0.161597	11.348	3.54461	0.00730835	0.0176081	-4.5531	hns	DNA-binding transcriptional dual regulator H-NS
b1897	0.967517	1.50332	3.54413	0.00731361	0.017611	-3.07651	otsB	trehalose-6-phosphate phosphatase
b1502	-1.08677	0.292406	-3.53806	0.00737956	0.01776	-2.72567	ydeQ	putative fimbrial adhesin protein YdeQ
b3638	0.291391	6.79144	3.53512	0.0074118	0.0178277	-4.36482	yicR	RadC-like JAB domain-containing protein YicR
b2000	0.248626	4.96	3.51821	0.00759988	0.01827	-4.06605	flu	CP4-44 prophage%3B self recognizing antigen 43 (Ag43) autotransporter
b1521	0.402138	3.39258	3.5152	0.00763388	0.0183416	-3.69247	uxaB	tagaturonate reductase
b0164	0.246987	5.21486	3.51319	0.00765664	0.0183861	-4.12735	yaeI	phosphodiesterase YaeI
b3144	-0.400134	3.44464	-3.5123	0.00766671	0.0183906	-3.70625	yraJ	putative fimbrial usher protein YraJ
b3930	0.306279	4.75159	3.51216	0.00766839	0.0183906	-4.03073	menA	1%2C4-dihydroxy-2-naphthoate octaprenyltransferase
b3101	-0.351264	3.66657	-3.51191	0.00767123	0.0183906	-3.76731	yqjF	DoxX family protein
b4423	-0.412493	3.13956	-3.51067	0.00768534	0.0184073	-3.62457	ldrC	small toxic polypeptide LdrC
b2276	-0.204537	8.17269	-3.51055	0.00768666	0.0184073	-4.57346	nuoN	NADH:quinone oxidoreductase subunit N
b0080	0.180119	7.3762	3.50907	0.0077036	0.0184377	-4.48252	cra	DNA-binding transcriptional dual regulator Cra
b2942	0.151367	8.13007	3.50744	0.00772224	0.0184721	-4.57497	metK	methionine adenosyltransferase
b0545	-0.710557	1.40321	-3.50641	0.00773401	0.0184901	-3.10141	ybcL	DLP12 prophage%3B periplasmic protein YbcL
b4361	-0.21923	5.75248	-3.50435	0.00775768	0.0185365	-4.24187	dnaC	DNA replication protein DnaC
b0215	-0.215974	5.70894	-3.50199	0.00778494	0.0185914	-4.23788	dnaQ	DNA polymerase III subunit epsilon
b3385	-0.19155	6.45088	-3.49876	0.00782235	0.0186705	-4.36907	gph	phosphoglycolate phosphatase
b4014	0.524088	3.26528	3.49518	0.00786406	0.0187597	-3.68733	aceB	malate synthase A
b0252	-0.795461	1.56841	-3.49407	0.00787705	0.0187746	-3.16866	yafZ	CP4-6 prophage%3B conserved protein YafZ
b2714	0.413021	2.97928	3.49391	0.00787892	0.0187746	-3.6115	ascG	DNA-binding transcriptional repressor AscG
b1777	0.320049	4.88964	3.49345	0.00788433	0.0187771	-4.08968	yeaC	conserved protein YeaC
b3223	0.635088	1.67457	3.49287	0.00789115	0.0187831	-3.22003	nanE	putative N-acetylmannosamine-6-phosphate epimerase
b2807	-0.478884	5.1436	-3.49097	0.0079135	0.018826	-4.14182	ygdD	conserved inner membrane protein YgdD
b4342	-0.390306	3.72416	-3.48926	0.0079336	0.0188635	-3.81735	yjiT	putative uncharacterized protein YjiT
b1792	-0.320809	4.00121	-3.48627	0.00796893	0.0189371	-3.89474	yeaO	conserved protein YeaO
b0326	-1.31027	-0.247869	-3.48508	0.00798313	0.0189605	-2.6707	yahL	uncharacterized protein YahL
b0435	0.197907	6.20111	3.48373	0.00799915	0.0189866	-4.35294	bolA	DNA-binding transcriptional dual regulator BolA
b0256	0.413176	4.34189	3.48342	0.00800287	0.0189866	-3.98422	insI-1	IS30 transposase
b0251	0.650739	2.47881	3.4808	0.00803404	0.0190501	-3.48362	yafY	CP4-6 prophage%3B inner membrane lipoprotein YafY
b1460	-0.595252	1.90631	-3.47945	0.00805023	0.0190781	-3.30454	ydcC	H repeat-associated putative transposase YdcC
b3834	0.254779	6.53897	3.47762	0.00807213	0.0191196	-4.41753	ubiJ	ubiquinone biosynthesis accessory factor UbiJ
b2035	-0.228508	6.50306	-3.4688	0.0081789	0.0193619	-4.42416	wbbH	putative O-antigen polymerase
b2523	0.294163	7.06717	3.46616	0.00821106	0.0194275	-4.51068	pepB	aminopeptidase B
b3121	-0.936631	0.875479	-3.46246	0.00825644	0.0195242	-3.00506	yhaC	uncharacterized protein YhaC
b0287	-0.310818	4.13219	-3.45475	0.00835191	0.0197392	-3.97669	yagU	inner membrane protein that contributes to acid resistance
b2304	0.172936	7.27631	3.44815	0.00843453	0.0199236	-4.56598	yfcH	putative NAD-dependent epimerase YfcH
b3642	-0.551502	3.17324	-3.44709	0.00844782	0.0199442	-3.73041	pyrE	orotate phosphoribosyltransferase
b1450	-0.606996	1.75849	-3.44256	0.00850513	0.0200686	-3.31576	mcbR	DNA-binding transcriptional dual regulator McbR
b1714	-0.150647	8.94718	-3.43509	0.00860058	0.0202828	-4.74447	pheS	phenylalanine--tRNA ligase subunit alpha
b0394	0.434256	3.6957	3.43415	0.0086126	0.0203001	-3.90088	mak	manno(fructo)kinase
b2065	-0.22964	7.48823	-3.43344	0.0086218	0.0203108	-4.61472	dcd	dCTP deaminase
b1581	-0.872594	0.596833	-3.42583	0.00872036	0.0205318	-2.98635	rspA	mandelate racemase/muconate lactonizing enzyme family protein RspA
b1646	0.302951	4.31366	3.42444	0.00873852	0.0205635	-4.07142	sodC	superoxide dismutase (Cu-Zn)
b3512	-0.929317	0.537836	-3.4239	0.00874558	0.0205689	-2.97174	gadE	DNA-binding transcriptional activator GadE
b0280	0.288377	5.25397	3.42164	0.00877519	0.0206274	-4.27919	yagN	CP4-6 prophage%3B protein YagN
b3689	0.208885	5.81593	3.42019	0.00879419	0.0206609	-4.38705	yidR	DUF3748 domain-containing galacturonate catabolism protein YidR
b0602	-0.882134	1.40425	-3.41618	0.00884712	0.020774	-3.23519	ybdN	putative PAPS reductase/DUF3440 domain-containing protein YbdN
b2507	0.179561	9.20049	3.41517	0.00886053	0.0207942	-4.77877	guaA	GMP synthetase
b0236	-0.795197	0.911533	-3.41461	0.00886788	0.0207966	-3.09481	prfH	putative peptide chain release factor
b3622	-0.259495	5.65901	-3.41437	0.00887112	0.0207966	-4.36625	waaL	O-antigen ligase
b1896	0.420755	3.08205	3.4109	0.00891728	0.0208936	-3.77046	otsA	trehalose-6-phosphate synthase
b0761	0.284651	5.1918	3.40953	0.0089356	0.0209252	-4.28558	modE	DNA-binding transcriptional dual regulator ModE
b2604	-0.28489	4.76574	-3.40862	0.00894783	0.0209426	-4.19448	dgcN	diguanylate cyclase DgcN
b0296	0.630922	1.60867	3.40592	0.008984	0.0210159	-3.33543	ykgM	putative ribosomal protein
b3538	-0.270677	5.49174	-3.40351	0.00901645	0.0210804	-4.35208	bcsG	cellulose phosphoethanolamine transferase
b3700	-0.179695	7.03026	-3.40288	0.00902495	0.021089	-4.60486	recF	DNA repair protein RecF
b1943	0.672739	1.66727	3.39885	0.00907963	0.0211975	-3.36424	fliK	flagellar hook-length control protein
b0413	0.275744	5.95349	3.39874	0.00908117	0.0211975	-4.44464	nrdR	NrdR transcriptional repressor
b1068	0.2984	5.19214	3.39806	0.0090904	0.0212077	-4.30371	yceM	putative oxidoreductase YceM
b1815	-0.313252	3.83062	-3.3975	0.00909802	0.0212141	-3.99107	pdeD	putative c-di-GMP phosphodiesterase PdeD
b3209	0.383419	4.84773	3.39525	0.00912878	0.0212744	-4.23493	elbB	low activity glyoxalase ElbB
b2668	0.278114	5.2996	3.3898	0.00920357	0.0214368	-4.33858	ygaP	thiosulfate sulfurtransferase YgaP
b4198	0.441362	3.02337	3.38946	0.00920834	0.0214368	-3.7874	ulaF	L-ribulose-5-phosphate 4-epimerase UlaF
b2182	-0.243435	7.70737	-3.38716	0.00924013	0.0214993	-4.71437	bcr	multidrug efflux pump Bcr
b2303	0.229428	6.29427	3.38442	0.00927815	0.0215762	-4.52496	folX	dihydroneopterin triphosphate 2'-epimerase
b2082	-0.574199	2.03675	-3.37394	0.00942521	0.0219064	-3.51039	ogrK	prophage P2 late control protein OgrK
b1202	-0.299965	4.48843	-3.36661	0.00952949	0.022137	-4.19931	ycgV	putative autotransporter adhesin YcgV
b1813	0.277351	4.30374	3.35735	0.00966303	0.0224352	-4.17515	nudL	putative NUDIX hydrolase with low 3-phosphohydroxypyruvate phosphatase activity
b0952	-0.204156	5.7223	-3.35373	0.00971586	0.0225458	-4.47411	pqiC	intermembrane transport lipoprotein PqiC
b0336	-0.322172	3.91127	-3.35048	0.00976335	0.0226439	-4.08587	codB	cytosine transporter
b1036	-0.234464	6.8396	-3.34905	0.0097844	0.0226764	-4.66353	ycdZ	putative inner membrane protein
b3036	-0.269433	4.81547	-3.34882	0.00978781	0.0226764	-4.2999	ygiA	putative protein YgiA
b0686	0.236387	5.47179	3.34735	0.00980954	0.0227146	-4.4396	ybfF	esterase
b2321	-0.177849	6.55049	-3.34627	0.00982545	0.0227394	-4.62553	flk	putative flagella assembly protein
b2615	-0.210681	5.78135	-3.34563	0.00983484	0.022749	-4.49737	nadK	NAD kinase
b4145	-0.33522	3.96312	-3.34519	0.00984139	0.022752	-4.10702	yjeJ	protein YjeJ
b4054	0.180231	6.85167	3.34356	0.00986561	0.0227958	-4.67542	tyrB	tyrosine aminotransferase
b3547	-0.448298	2.99007	-3.34258	0.00988013	0.0228173	-3.84612	yhjX	putative pyruvate transporter
b1659	0.382177	3.65392	3.34197	0.00988921	0.0228261	-4.03588	ydhB	putative LysR family DNA-binding transcriptional regulator YdhB
b3893	-0.185345	9.32327	-3.33767	0.00995339	0.022962	-4.89993	fdoH	formate dehydrogenase O subunit beta
b0762	0.420004	4.05456	3.33677	0.00996685	0.0229809	-4.14668	acrZ	multidrug efflux pump accessory protein AcrZ
b3018	-0.206609	6.67873	-3.33619	0.00997569	0.0229891	-4.66068	plsC	1-acylglycerol-3-phosphate O-acyltransferase
b3641	-0.178867	6.6612	-3.33478	0.00999684	0.0230256	-4.66052	slmA	nucleoid occlusion factor SlmA
b2283	-0.206197	8.03287	-3.33365	0.0100139	0.0230527	-4.83735	nuoG	NADH:quinone oxidoreductase subunit G
b3970	-1.69611	-0.211225	-3.32997	0.0100695	0.0231683	-2.90238	rrlB	23S ribosomal RNA
b2267	0.348019	3.9815	3.32894	0.0100851	0.023192	-4.14182	elaA	putative N-acetyltransferase ElaA
b3012	0.307597	3.89401	3.32807	0.0100984	0.0232103	-4.12129	dkgA	methylglyoxal reductase DkgA
b1982	0.257243	6.84116	3.32349	0.0101683	0.0233578	-4.70572	amn	AMP nucleosidase
b2115	-0.553698	2.31412	-3.32316	0.0101734	0.0233578	-3.67584	yehF	putative protein YehF
b1670	0.737018	0.994412	3.31346	0.0103233	0.0236897	-3.28812	ydhU	putative cytochrome YdhU
b0655	-0.230477	6.56395	-3.31208	0.0103448	0.0237223	-4.6813	gltI	glutamate/aspartate ABC transporter periplasmic binding protein
b1647	0.26025	5.5802	3.31184	0.0103485	0.0237223	-4.51612	ydhF	putative oxidoreductase
b1675	0.35233	3.34613	3.30616	0.0104376	0.023914	-4.00932	fumD	fumarase D
b1931	-0.860492	0.830441	-3.30096	0.0105199	0.0240898	-3.24612	yedK	putative SOS response-associated peptidase YedK
b1380	0.368752	3.9049	3.29764	0.0105727	0.0241979	-4.17171	ldhA	D-lactate dehydrogenase
b3892	-0.163559	8.41311	-3.29473	0.0106193	0.024292	-4.9375	fdoI	formate dehydrogenase O subunit gamma
b3739	-0.177171	8.23924	-3.2943	0.0106262	0.0242948	-4.92193	atpI	ATP synthase accessory factor
b1855	-0.177345	7.0979	-3.28811	0.0107261	0.0245103	-4.79562	lpxM	myristoyl-acyl carrier protein-dependent acyltransferase
b2506	-0.441693	2.67453	-3.28738	0.0107378	0.0245243	-3.84289	yfgI	nalidixic acid resistance protein YfgI
b3201	0.166618	7.62982	3.2827	0.0108141	0.0246855	-4.87119	lptB	lipopolysaccharide transport system ATP binding protein
b4234	-0.145886	7.93869	-3.28125	0.0108379	0.0247269	-4.91003	yjgA	DUF615 domain-containing protein YjgA
b4204	-0.39096	3.13908	-3.28019	0.0108552	0.0247526	-3.98789	yjfZ	protein YjfZ
b2413	-0.240973	5.14648	-3.27954	0.0108659	0.0247526	-4.47987	cysZ	sulfate:H(+) symporter
b0367	1.06955	0.307209	3.27952	0.0108663	0.0247526	-3.13947	tauC	taurine ABC transporter membrane subunit
b0107	-0.280264	4.30568	-3.27899	0.0108749	0.0247593	-4.29636	hofB	T2SSE family protein
b3519	-0.341512	3.55191	-3.27807	0.0108901	0.0247686	-4.10561	treF	cytoplasmic trehalase
b2204	0.705001	1.23311	3.27805	0.0108904	0.0247686	-3.41758	napH	ferredoxin-type protein NapH
b3205	0.146846	7.80639	3.27617	0.0109214	0.0248153	-4.90306	rapZ	RNase adaptor protein
b0895	-0.495135	2.38098	-3.27612	0.0109224	0.0248153	-3.7723	dmsB	dimethyl sulfoxide reductase subunit B
b1614	0.217297	7.99319	3.27529	0.010936	0.0248332	-4.92657	ydgA	conserved protein YdgA
b1124	-0.203089	6.65349	-3.27313	0.0109718	0.0249015	-4.75699	potC	spermidine preferential ABC transporter membrane subunit PotC
b3509	-0.794715	1.30981	-3.26843	0.0110502	0.0250663	-3.44054	hdeB	periplasmic acid stress chaperone
b0580	-0.410846	3.78309	-3.2671	0.0110724	0.0251037	-4.18298	ybdJ	DUF1158 domain-containing protein YbdJ
b0603	-0.571613	2.9834	-3.2648	0.0111111	0.0251782	-3.96315	ybdO	putative LysR family DNA-binding transcriptional regulator YbdO
b2348	-0.567835	2.11305	-3.25709	0.0112415	0.0254605	-3.71821	argW	tRNA-Arg
b3718	0.45557	2.37243	3.25536	0.011271	0.025514	-3.81094	yieK	putative glucosamine-6-phosphate deaminase YieK
b1851	-0.178756	6.71292	-3.25143	0.0113383	0.025653	-4.8006	edd	phosphogluconate dehydratase
b3458	-0.240809	5.0329	-3.24927	0.0113756	0.0257239	-4.50426	livK	L-leucine/L-phenylalanine ABC transporter periplasmic binding protein
b1716	-0.151072	12.2172	-3.24784	0.0114002	0.0257661	-5.01274	rplT	50S ribosomal subunit protein L20
b2910	-0.14929	8.27578	-3.24598	0.0114325	0.0258256	-5.00252	zapA	cell division protein ZapA
b2621	0.192139	13.435	3.24528	0.0114446	0.0258395	-4.9922	ssrA	tmRNA
b0949	-0.164134	8.53404	-3.24311	0.0114823	0.0259112	-5.02918	uup	ATP-binding protein with possible role in replication
b0703	-0.711418	1.35462	-3.24213	0.0114995	0.0259365	-3.50076	ybfO	conserved protein%2C rhs-like YbfO
b1096	-0.261439	5.46655	-3.23856	0.0115618	0.0260636	-4.60874	pabC	aminodeoxychorismate lyase
b3927	-0.249841	5.95033	-3.2354	0.0116174	0.02617	-4.70164	glpF	glycerol facilitator
b4050	-0.445992	3.30468	-3.23487	0.0116268	0.02617	-4.10425	pspG	phage shock protein G
b2589	-1.36572	-0.717221	-3.23485	0.0116271	0.02617	-2.95237	rrlG	23S ribosomal RNA
b0921	0.197871	6.56732	3.23191	0.0116791	0.0262734	-4.81101	cmoM	tRNA cmo(5)U34 methyltransferase
b3043	-0.42424	2.7152	-3.23104	0.0116945	0.0262946	-3.94458	ygiL	putative fimbrial protein YgiL
b4058	0.141138	8.24195	3.23058	0.0117028	0.0262994	-5.02475	uvrA	excision nuclease subunit A
b1904	-0.669117	1.21779	-3.22864	0.0117372	0.0263632	-3.48164	yecR	lipoprotein YecR
b2819	0.196055	6.52297	3.22369	0.0118257	0.0265483	-4.81711	recD	exodeoxyribonuclease V subunit RecD
b0227	0.623284	1.69864	3.22216	0.0118532	0.026583	-3.65252	yafL	NlpC/P60 family protein YafL
b1728	-0.28663	5.78026	-3.22215	0.0118534	0.026583	-4.69247	ydjM	putative inner membrane protein regulated by LexA
b0543	-0.351558	3.84021	-3.21927	0.0119054	0.0266859	-4.27485	emrE	multidrug/betaine/choline efflux transporter EmrE
b4079	0.277538	4.34172	3.21781	0.011932	0.0267315	-4.40526	fdhF	formate dehydrogenase H
b3656	0.307045	3.90476	3.21543	0.0119751	0.0268143	-4.30278	yicI	alpha-D-xyloside xylohydrolase
b4717	0.837041	3.15894	3.21241	0.0120303	0.026924	-4.09701	micL	small regulatory RNA MicL-S
b2296	-0.149617	9.95654	-3.21003	0.0120739	0.0270078	-5.09413	ackA	acetate kinase
b3353	0.181667	6.35329	3.20362	0.012192	0.0272579	-4.82172	yheT	putative hydrolase YheT
b0656	0.465018	2.25608	3.2003	0.0122538	0.027382	-3.86307	insH-3	IS5 transposase and trans-activator
b2977	0.522013	1.90542	3.1953	0.0123473	0.0275696	-3.76234	glcG	putative heme-binding protein GlcG
b4420	-0.430309	3.37488	-3.19514	0.0123505	0.0275696	-4.18715	rdlA	putative antisense RNA regulator of LdrA
b3711	-0.239393	4.97368	-3.19319	0.0123872	0.0276373	-4.58114	yidZ	putative LysR-type transcriptional regulator YidZ
b2826	-0.419045	2.7186	-3.19202	0.0124092	0.0276722	-4.00766	ppdA	conserved protein PpdA
b2908	0.176966	8.13325	3.19074	0.0124335	0.0277122	-5.07676	pepP	proline aminopeptidase P II
b2463	0.181939	6.5474	3.18994	0.0124486	0.0277317	-4.87477	maeB	malate dehydrogenase
b2698	-0.245545	4.85228	-3.18736	0.0124976	0.0278265	-4.56443	recX	RecA inhibitor RecX
b2955	0.150701	7.38691	3.18544	0.0125342	0.0278937	-4.99623	yggW	putative coproporphyrinogen-III oxidase-like protein YggW
b3543	0.285061	4.3145	3.18482	0.012546	0.0279057	-4.45144	dppB	dipeptide ABC transporter membrane subunit DppB
b3688	0.190897	5.81507	3.17971	0.0126441	0.0281094	-4.76839	yidQ	DUF1375 domain-containing putative lipoprotein YidQ
b3429	0.257508	5.37122	3.17662	0.0127038	0.0282173	-4.69131	glgA	glycogen synthase
b1003	0.679326	1.25894	3.17653	0.0127056	0.0282173	-3.58622	yccJ	PF13993 family protein YccJ
b0327	-0.529606	3.09403	-3.17463	0.0127423	0.0282845	-4.13874	yahM	uncharacterized protein YahM
b3350	0.249392	5.16489	3.17383	0.0127579	0.0282928	-4.65405	kefB	K(+) : H(+) antiporter KefB
b4471	-0.426002	2.51885	-3.17367	0.012761	0.0282928	-3.97804	tdcG	L-serine deaminase III
b2011	0.223362	6.0182	3.17343	0.0127656	0.0282928	-4.81346	sbcB	exodeoxyribonuclease I
b0919	-0.285215	3.9728	-3.17151	0.0128032	0.0283615	-4.38625	ycbJ	putative phosphotransferase YcbJ
b2606	-0.14435	11.3592	-3.16906	0.0128511	0.0284532	-5.14733	rplS	50S ribosomal subunit protein L19
b4520	-0.678777	1.79937	-3.1687	0.0128581	0.0284542	-3.7562	ymgF	inner membrane protein that interacts with cell division proteins
b3551	0.190852	7.05541	3.16568	0.0129175	0.0285601	-4.9857	bisC	biotin sulfoxide reductase
b2201	0.315809	3.74775	3.16559	0.0129191	0.0285601	-4.34145	ccmA	heme trafficking system ATP-binding protein
b3367	-0.518656	2.67338	-3.16523	0.0129264	0.0285608	-4.03309	nirC	nitrite transporter NirC
b1214	-0.168793	7.69449	-3.16491	0.0129326	0.0285608	-5.06613	ychA	transglutaminase-like/TPR repeat-containing protein
b1066	0.299402	5.03534	3.16282	0.0129738	0.0286373	-4.64428	rimJ	ribosomal-protein-S5-alanine N-acetyltransferase
b0307	0.46211	2.56047	3.1584	0.0130617	0.0288166	-4.02056	ykgF	putative amino acid dehydrogenase with NAD(P)-binding domain and ferridoxin-like domain
b2503	-0.456343	3.03952	-3.15535	0.0131225	0.0289362	-4.15636	pdeF	cyclic di-GMP phosphodiesterase PdeF
b3811	0.181448	6.5209	3.15421	0.0131454	0.028972	-4.92751	xerC	site-specific tyrosine recombinase
b3611	0.166883	7.89247	3.15387	0.0131524	0.0289726	-5.1081	yibN	putative sulfurtransferase YibN
b4264	0.289101	4.19768	3.14819	0.0132669	0.0292101	-4.48219	idnR	DNA-binding transcriptional dual regulator IdnR
b0221	0.348769	3.68071	3.14744	0.013282	0.0292249	-4.35209	fadE	acyl-CoA dehydrogenase
b2560	-0.236061	4.81669	-3.14719	0.0132871	0.0292249	-4.62092	pgpC	phosphatidylglycerophosphatase C
b0077	0.21536	5.11808	3.14123	0.0134087	0.0294715	-4.69643	ilvI	acetolactate synthase/acetohydroxybutanoate synthase%2C catalytic subunit
b1557	-0.27072	11.1179	-3.14103	0.0134128	0.0294715	-5.19388	cspB	Qin prophage%3B cold shock-like protein CspB
b0642	0.128926	9.87417	3.13765	0.0134823	0.0296092	-5.2106	leuS	leucine--tRNA ligase
b2186	-0.165716	6.9747	-3.13528	0.0135312	0.0297017	-5.0227	yejK	nucleoid-associated protein YejK
b4676	-0.492458	2.0377	-3.13039	0.0136328	0.0299094	-3.89883	yoaK	putative membrane protein YoaK
b4450	0.796914	0.772492	3.12951	0.013651	0.0299344	-3.50937	arcZ	small regulatory RNA ArcZ
b3310	-0.180226	12.3894	-3.12845	0.0136732	0.0299679	-5.20048	rplN	50S ribosomal subunit protein L14
b1927	0.350253	4.34382	3.12769	0.013689	0.0299874	-4.54876	amyA	alpha-amylase
b4305	-0.912864	0.569401	-3.12155	0.0138182	0.0302551	-3.45193	sgcX	KpLE2 phage-like element%3B putative endoglucanase with Zn-dependent exopeptidase domain
b0822	0.227024	5.13443	3.11761	0.0139017	0.0304227	-4.7375	ybiV	sugar phosphatase
b0086	0.17516	7.80877	3.11385	0.0139821	0.0305832	-5.16203	murF	D-alanyl-D-alanine-adding enzyme
b2800	0.655106	1.40842	3.11048	0.0140545	0.030726	-3.73718	fucA	L-fuculose-phosphate aldolase
b2767	-0.580395	1.65417	-3.10627	0.0141452	0.0309089	-3.81403	ygcO	putative 4Fe-4S cluster-containing protein
b3746	0.241258	4.64136	3.10398	0.0141949	0.0310018	-4.65377	ravA	regulatory ATPase RavA
b1504	-1.47181	-0.64399	-3.10218	0.0142341	0.0310718	-3.1668	ydeS	putative fimbrial protein YdeS
b3667	0.379395	3.71009	3.09526	0.014386	0.0313785	-4.44279	uhpC	inner membrane protein sensing glucose-6-phosphate
b2924	0.149554	7.63316	3.09512	0.014389	0.0313785	-5.17059	mscS	small conductance mechanosensitive channel MscS
b3626	-0.279399	5.94961	-3.0947	0.0143982	0.0313827	-4.92563	waaJ	UDP-glucose:(glucosyl)LPS alpha-1%2C2-glucosyltransferase
b1730	1.32187	0.170696	3.09435	0.0144059	0.0313838	-3.38673	ydjO	protein YdjO
b2840	0.340112	4.40448	3.09325	0.0144302	0.031421	-4.61753	ygeA	amino acid racemase
b2470	0.282168	5.54348	3.09097	0.0144808	0.0315154	-4.86084	acrD	multidrug efflux pump RND permease AcrD
b2016	0.163118	7.16101	3.08784	0.0145504	0.031651	-5.12371	yeeZ	putative epimerase YeeZ
b3294	-0.170885	12.0323	-3.08741	0.0145601	0.0316562	-5.27109	rplQ	50S ribosomal subunit protein L17
[truncated: 2,346 more rows]

## Sheet: WS02
WS-02: Differential expression of all E. coli K12 genes during exposure to L-Ag NPs at 30 min.
REFID	logFC	AveExpr	t	P.Value	adj.P.Val	B	Gene name	Product
b0484	7.30597	8.95722	110.401	2.82027e-17	1.22512e-13	29.1771	copA	Cu(+) exporting P-type ATPase
b0929	-4.1133	10.1536	-85.1396	4.17195e-16	9.06149e-13	27.5343	ompF	outer membrane porin F
b0161	4.03853	10.0572	80.4632	7.49268e-16	1.08494e-12	26.9981	degP	periplasmic serine endoprotease DegP
b0586	4.71918	6.91601	63.0659	9.34838e-15	8.8478e-12	24.2878	entF	apo-serine activating enzyme
b0123	5.1013	7.29361	62.5466	1.01839e-14	8.8478e-12	24.2637	cueO	cuprous oxidase/multicopper oxidase with role in copper homeostasis
b2155	3.91144	7.68215	60.3653	1.47071e-14	1.06479e-11	24.0739	cirA	ferric dihyroxybenzoylserine outer membrane transporter
b0019	3.05131	7.57451	56.0314	3.17995e-14	1.97339e-11	23.3527	nhaA	Na(+):H(+) antiporter NhaA
b2936	3.0683	7.69879	52.9711	5.68578e-14	2.95923e-11	22.7879	loiP	metalloprotease LoiP
b1378	2.4507	9.27804	52.5865	6.131e-14	2.95923e-11	22.7132	ydbK	putative pyruvate-flavodoxin oxidoreductase
b4062	3.96795	6.65936	50.6226	9.08838e-14	3.62343e-11	22.2476	soxS	DNA-binding transcriptional dual regulator SoxS
b3088	2.70321	8.21387	50.576	9.17534e-14	3.62343e-11	22.3138	alx	putative membrane-bound redox modulator Alx
b0593	4.182	5.90713	49.521	1.14102e-13	4.13048e-11	21.8851	entC	isochorismate synthase EntC
b1452	2.54801	8.00955	47.7284	1.6704e-13	5.18234e-11	21.7103	yncE	PQQ-like domain-containing protein YncE
b1743	6.22821	5.95516	47.5165	1.74904e-13	5.18234e-11	21.2026	spy	ATP-independent periplasmic chaperone
b4367	2.28955	8.48631	47.4115	1.78948e-13	5.18234e-11	21.6316	fhuF	hydroxamate siderophore iron reductase
b1846	3.76471	6.36013	45.4516	2.76813e-13	7.26072e-11	21.1692	yebE	conserved inner membrane protein YebE
b2922	2.84479	7.78871	45.3368	2.84144e-13	7.26072e-11	21.1769	yggE	uncharacterized protein YggE
b2390	3.74496	6.06866	44.4401	3.49272e-13	8.42909e-11	20.9188	ypeC	DUF2502 domain-containing protein YpeC
b4354	-4.20116	6.36678	-44.2045	3.68987e-13	8.43621e-11	20.869	btsT	pyruvate:H(+) symporter
b1814	2.10682	9.45087	43.9663	3.90161e-13	8.47429e-11	20.8139	sdaA	L-serine deaminase I
b1829	2.09536	9.13562	43.5302	4.3247e-13	8.94595e-11	20.712	htpX	zinc dependent endoprotease
b0594	4.93372	5.58555	43.2015	4.67686e-13	9.23466e-11	20.4502	entE	2%2C3-dihydroxybenzoate-AMP ligase
b1283	3.70748	7.89222	42.1915	5.97084e-13	1.0546e-10	20.427	osmB	osmotically-inducible lipoprotein OsmB
b0575	4.52228	4.98784	42.1605	6.01641e-13	1.0546e-10	20.0965	cusA	copper/silver export system RND permease
b1172	3.67309	5.85978	42.1247	6.06929e-13	1.0546e-10	20.3743	ymgG	PF13488 family protein YmgG
b2597	3.24847	8.78979	40.9468	8.13351e-13	1.35892e-10	20.0726	raiA	stationary phase translation inhibitor and ribosome stability factor
b3860	2.02309	8.50903	39.3481	1.22673e-12	1.91168e-10	19.6409	dsbA	thiol:disulfide oxidoreductase DsbA
b1113	3.16272	6.50271	39.3311	1.23221e-12	1.91168e-10	19.7199	ldtC	L%2CD-transpeptidase YcfS
b0839	2.43601	6.62523	38.3707	1.59011e-12	2.38188e-10	19.4532	dacC	D-alanyl-D-alanine carboxypeptidase DacC
b0574	6.34952	4.14337	37.4246	2.05696e-12	2.97848e-10	18.0691	cusB	copper/silver export system membrane fusion protein
b3924	2.20398	7.52709	37.0824	2.26123e-12	3.16864e-10	19.044	fpr	flavodoxin/ferredoxin-NADP(+) reductase
b0811	2.07	8.0855	36.7066	2.51156e-12	3.40945e-10	18.9069	glnH	L-glutamine ABC transporter periplasmic binding protein
b1171	3.66269	6.01311	36.4133	2.72802e-12	3.59106e-10	18.9244	ymgD	PF16456 family protein YmgD
b0674	1.89399	7.93376	36.1617	2.93008e-12	3.74361e-10	18.7494	asnB	asparagine synthetase B
b3055	1.95771	8.05169	36.0578	3.01825e-12	3.74608e-10	18.7142	ygiM	putative signal transduction protein (SH3 domain)
b0805	2.56807	6.23562	35.9534	3.10976e-12	3.75244e-10	18.7867	fiu	putative iron siderophore outer membrane transporter
b3744	1.93855	9.65941	35.8276	3.2242e-12	3.76475e-10	18.5988	asnA	asparagine synthetase A
b0014	1.62254	10.9221	35.7539	3.29329e-12	3.76475e-10	18.5561	dnaK	chaperone protein DnaK
b4131	-4.714	4.34392	-35.5543	3.4888e-12	3.85565e-10	18.2662	cadA	lysine decarboxylase 1
b3552	1.89909	8.11097	35.494	3.55033e-12	3.85565e-10	18.5404	yiaD	PF13488 family lipoprotein YiaD
b0150	1.90901	9.44805	35.2502	3.8116e-12	4.03843e-10	18.4261	fhuA	ferrichrome outer membrane transporter/phage receptor
b1379	2.98653	6.5234	34.6135	4.59871e-12	4.75638e-10	18.3823	hslJ	lipoprotein implicated in Novobiocin resistance
b0585	4.44125	5.30064	34.3554	4.96707e-12	5.01789e-10	18.2716	fes	enterochelin esterase
b0473	1.57638	9.70299	34	5.52833e-12	5.44242e-10	18.0268	htpG	chaperone protein HtpG
b0595	5.24765	4.67267	33.9353	5.63786e-12	5.44242e-10	17.924	entB	enterobactin synthase component B
b1424	1.8382	7.83614	33.6208	6.20494e-12	5.85962e-10	17.9649	opgD	glucan biosynthesis protein D
b4143	1.54588	11.4621	33.4383	6.56257e-12	6.00224e-10	17.8161	groL	chaperonin GroEL
b0162	2.76932	5.81053	33.4039	6.63231e-12	6.00224e-10	18.0347	cdaR	DNA-binding transcriptional activator CdaR
b4383	1.56047	10.8375	33.3328	6.77937e-12	6.01012e-10	17.7914	deoB	phosphopentomutase
b3347	1.54237	9.99366	33.1479	7.17876e-12	6.23691e-10	17.7444	fkpA	peptidyl-prolyl cis-trans isomerase FkpA
b0220	2.37874	6.74109	32.8907	7.7778e-12	6.62485e-10	17.8112	ivy	periplasmic chaperone%2C inhibitor of vertebrate C-type lysozyme
b3908	1.60258	11.0616	32.7075	8.23781e-12	6.88174e-10	17.5805	sodA	superoxide dismutase (Mn)
b0809	1.79095	7.47477	32.5278	8.71824e-12	7.09614e-10	17.6264	glnQ	L-glutamine ABC transporter ATP binding subunit
b3687	2.37889	6.07509	32.4587	8.9112e-12	7.09614e-10	17.7162	ibpA	small heat shock protein IbpA
b2592	1.75648	8.58583	32.4328	8.98452e-12	7.09614e-10	17.5407	clpB	ClpB chaperone
b0463	1.53781	9.02826	31.8708	1.07541e-11	8.34213e-10	17.3352	acrA	multidrug efflux pump membrane fusion lipoprotein AcrA
b0588	2.6077	5.32663	31.3143	1.28892e-11	9.82296e-10	17.3746	fepC	ferric enterobactin ABC transporter ATP binding subunit
b4392	1.90478	6.41474	31.1902	1.34264e-11	1.00559e-09	17.2562	slt	soluble lytic murein transglycosylase
b1110	2.00897	6.75601	30.5406	1.66683e-11	1.22724e-09	17.0038	ycfJ	PF05433 family protein YcfJ
b0287	-5.06159	3.89202	-30.3368	1.78551e-11	1.29271e-09	16.6048	yagU	inner membrane protein that contributes to acid resistance
b2671	3.51127	5.02776	30.2578	1.83399e-11	1.30604e-09	17.0182	ygaC	protein YgaC
b1216	1.77113	7.45011	29.9874	2.01112e-11	1.40908e-09	16.745	chaA	Na(+)/K(+):H(+) antiporter ChaA
b3038	1.45275	8.55632	29.8932	2.07718e-11	1.43226e-09	16.6486	ygiC	putative enzyme with ATPase activity
b0151	1.86839	6.71764	29.7682	2.1685e-11	1.47187e-09	16.7268	fhuC	iron(III) hydroxamate ABC transporter ATP binding subunit
b0152	2.02036	6.09312	29.5589	2.33148e-11	1.55815e-09	16.7123	fhuD	iron(III) hydroxamate ABC transporter periplasmic binding protein
b2675	3.08148	5.26741	29.5098	2.37161e-11	1.56095e-09	16.7658	nrdE	ribonucleoside-diphosphate reductase 2 subunit alpha
b0810	1.71732	6.75302	29.1835	2.65834e-11	1.72356e-09	16.5052	glnP	L-glutamine ABC transporter membrane subunit
b3728	2.54203	7.48616	29.1343	2.70482e-11	1.7279e-09	16.4483	pstS	phosphate ABC transporter periplasmic binding protein
b1186	-1.59037	6.99699	-28.7731	3.07424e-11	1.93544e-09	16.3313	nhaB	Na(+):H(+) antiporter NhaB
b4142	1.45812	8.51919	28.5138	3.37349e-11	2.09349e-09	16.1329	groS	cochaperonin GroES
b3727	1.94827	6.34001	28.3937	3.52276e-11	2.15533e-09	16.2555	pstC	phosphate ABC transporter membrane subunit PstC
b4384	1.35248	10.2893	28.2213	3.74988e-11	2.26243e-09	15.9752	deoD	purine nucleoside phosphorylase
b3870	1.32229	10.3891	28.1567	3.83901e-11	2.28182e-09	15.9482	glnA	glutamine synthetase
b0377	1.80266	6.29505	28.1108	3.90384e-11	2.28182e-09	16.148	sbmA	peptide antibiotic/peptide nucleic acid transporter
b0584	4.2663	6.02242	28.0657	3.96857e-11	2.28182e-09	16.2334	fepA	ferric enterobactin outer membrane transporter
b0462	1.26849	10.5389	28.0495	3.99213e-11	2.28182e-09	15.9034	acrB	multidrug efflux pump RND permease AcrB
b3005	1.44041	7.40799	27.9022	4.21373e-11	2.3772e-09	15.9564	exbD	Ton complex subunit ExbD
b1683	3.31309	4.81284	27.7468	4.46207e-11	2.44483e-09	16.1364	sufB	Fe-S cluster scaffold complex subunit SufB
b1482	3.02466	4.37742	27.7429	4.46839e-11	2.44483e-09	16.1236	osmC	osmotically inducible peroxiredoxin
b2209	2.5419	7.74838	27.7224	4.50246e-11	2.44483e-09	15.8872	eco	serine protease inhibitor ecotin
b3006	1.36504	8.08851	27.6156	4.68415e-11	2.51209e-09	15.8	exbB	Ton complex subunit ExbB
b0592	2.35944	5.1258	27.5168	4.8594e-11	2.5743e-09	16.0349	fepB	ferric enterobactin ABC transporter periplasmic binding protein
b3859	1.35579	8.56493	27.393	5.08942e-11	2.66367e-09	15.6909	srkA	stress response kinase A
b0865	3.19472	4.59896	27.2653	5.33908e-11	2.76106e-09	15.9555	ybjP	DUF3828 domain-containing lipoprotein YbjP
b2587	-1.21446	10.1742	-26.9744	5.95925e-11	3.04553e-09	15.4809	kgtP	alpha-ketoglutarate:H(+) symporter
b4484	1.4163	10.0666	26.7572	6.47374e-11	3.24445e-09	15.3942	cpxP	periplasmic protein CpxP
b1816	1.38685	7.51599	26.7475	6.49785e-11	3.24445e-09	15.4861	yoaE	putative inner membrane protein
b0478	1.31381	8.01375	26.6036	6.86702e-11	3.38981e-09	15.3944	ybaL	putative transporter YbaL
b1304	1.91141	5.64166	26.4921	7.16892e-11	3.49908e-09	15.5821	pspA	phage shock protein A
b2414	1.36261	7.51598	26.3673	7.52389e-11	3.63153e-09	15.3291	cysK	O-acetylserine sulfhydrylase A
b3363	1.6208	6.69585	26.2751	7.79882e-11	3.65884e-09	15.37	ppiA	peptidyl-prolyl cis-trans isomerase A
b0596	4.82318	4.49678	26.2701	7.81402e-11	3.65884e-09	15.5278	entA	2%2C3-dihydro-2%2C3-dihydroxybenzoate dehydrogenase
b1681	2.64703	4.71983	26.2638	7.83316e-11	3.65884e-09	15.5719	sufD	Fe-S cluster scaffold complex subunit SufD
b0572	8.68909	2.98465	26.1218	8.28029e-11	3.82655e-09	13.5198	cusC	copper/silver export system outer membrane channel
b1252	1.51553	6.75424	26.0369	8.56084e-11	3.90724e-09	15.2622	tonB	Ton complex subunit TonB
b3726	1.54792	6.53807	26.015	8.63478e-11	3.90724e-09	15.277	pstA	phosphate ABC transporter membrane subunit PstA
b1680	2.46313	4.59784	25.8916	9.06528e-11	4.05975e-09	15.4264	sufS	L-cysteine desulfurase
b4171	1.27235	9.42535	25.8152	9.34386e-11	4.14181e-09	15.0138	miaA	tRNA dimethylallyltransferase
b0970	1.20366	9.74307	25.7278	9.67388e-11	4.21952e-09	14.9693	yccA	modulator of FtsH protease
b0591	1.72924	6.11595	25.7175	9.71344e-11	4.21952e-09	15.2063	entS	enterobactin exporter EntS
b3472	1.38536	8.08796	25.6116	1.01325e-10	4.35796e-09	14.975	dcrB	periplasmic bacteriophage sensitivity protein DcrB
b1722	-1.59804	7.01657	-25.5028	1.05831e-10	4.46003e-09	15.0176	ydiY	acid-inducible putative outer membrane protein YdiY
b3037	1.40797	8.20598	25.5003	1.05938e-10	4.46003e-09	14.9215	ygiB	DUF1190 domain-containing protein YgiB
b0724	-1.37476	7.51714	-25.4807	1.06778e-10	4.46003e-09	14.9588	sdhB	succinate:quinone oxidoreductase%2C iron-sulfur cluster binding protein
b0378	1.69825	6.69862	25.2611	1.16659e-10	4.82635e-09	14.9444	yaiW	surface-exposed outer membrane lipoprotein
b4487	3.02059	4.43657	25.1689	1.21107e-10	4.96308e-09	15.1411	yjdP	protein YjdP
b4217	2.53512	6.09723	25.103	1.24397e-10	5.05027e-09	14.9773	ytfK	DUF1107 domain-containing protein YtfK
b1102	3.30575	4.44313	24.7458	1.4402e-10	5.7928e-09	14.9683	fhuE	ferric coprogen/ferric rhodotorulic acid outer membrane transporter
b3405	1.33497	7.3416	24.671	1.48549e-10	5.92017e-09	14.6153	ompR	DNA-binding transcriptional dual regulator OmpR
b4173	1.13555	9.45851	24.6056	1.52636e-10	6.02773e-09	14.4854	hflX	ribosome rescue factor HflX
b4174	1.17813	9.95485	24.521	1.58097e-10	6.18715e-09	14.4367	hflK	regulator of FtsH protease
b2614	1.15505	9.18566	24.4368	1.63753e-10	6.35128e-09	14.4166	grpE	nucleotide exchange factor GrpE
b0723	-1.18483	8.11042	-24.3616	1.6899e-10	6.4551e-09	14.4251	sdhA	succinate:quinone oxidoreductase%2C FAD binding protein
b0597	4.73253	3.92201	24.3558	1.69402e-10	6.4551e-09	14.7098	entH	proofreading thioesterase in enterobactin biosynthesis
b2432	1.43944	6.87356	24.2423	1.77681e-10	6.65564e-09	14.4702	yfeY	DUF1131 domain-containing lipoprotein YfeY
b3546	1.66369	7.62648	24.2417	1.77729e-10	6.65564e-09	14.4075	eptB	Kdo2-lipid A phosphoethanolamine 7''-transferase
b0589	2.11971	5.21196	24.1741	1.82872e-10	6.75117e-09	14.657	fepG	ferric enterobactin ABC transporter membrane subunit FepG
b3409	1.42288	6.54359	24.1674	1.83388e-10	6.75117e-09	14.4726	feoB	Fe(2(+)) transporter FeoB
b2494	1.35223	6.72439	23.9975	1.97091e-10	7.13765e-09	14.3733	bepA	beta-barrel assembly-enhancing protease
b2962	1.52313	6.72368	23.9965	1.97173e-10	7.13765e-09	14.3776	yggX	putative Fe(2(+))-trafficking protein
b2466	2.40886	5.38299	23.9542	2.00752e-10	7.1594e-09	14.5503	ypfG	DUF1176 domain-containing protein YpfG
b4716	1.33443	7.05067	23.9505	2.0107e-10	7.1594e-09	14.3176	cpxQ	small regulatory RNA CpxQ
b0492	1.23468	7.66788	23.7687	2.17334e-10	7.67561e-09	14.1806	cnoX	chaperedoxin
b3070	2.20902	4.62175	23.7243	2.21527e-10	7.7606e-09	14.5135	nfeF	NADPH-dependent ferric chelate reductase
b4132	-4.25541	3.27918	-23.6797	2.25825e-10	7.84786e-09	14.3213	cadB	lysine:cadaverine antiporter
b3498	1.18703	8.18092	23.3667	2.58658e-10	8.91183e-09	13.9619	prlC	oligopeptidase A
b2159	1.36766	6.61999	23.3501	2.60544e-10	8.91183e-09	14.0879	nfo	endonuclease IV
b0399	1.70542	5.49145	23.2405	2.73357e-10	9.27705e-09	14.1917	phoB	DNA-binding transcriptional dual regulator PhoB
b3708	3.51721	4.61666	23.0386	2.98784e-10	1.00614e-08	14.2337	tnaA	tryptophanase
b0124	-1.62384	8.20637	-22.9972	3.04319e-10	1.01261e-08	13.7943	gcd	quinoprotein glucose dehydrogenase
b0412	2.5315	4.44731	22.9782	3.06897e-10	1.01261e-08	14.1978	yajI	putative lipoprotein YajI
b0379	2.8336	4.28312	22.9723	3.07699e-10	1.01261e-08	14.207	yaiY	inner membrane protein
b1018	-1.9696	5.39295	-22.9223	3.14604e-10	1.02755e-08	14.07	efeO	ferrous iron transport system protein EfeO
b0020	2.06626	6.16932	22.845	3.25632e-10	1.05439e-08	13.9319	nhaR	DNA-binding transcriptional activator NhaR
b2898	1.12443	8.18901	22.831	3.27677e-10	1.05439e-08	13.7065	ygfZ	folate-binding protein
b3056	1.2639	8.21247	22.6751	3.51379e-10	1.119e-08	13.6317	cca	fused tRNA nucleotidyltransferase/2'%2C3'-cyclic phosphodiesterase/2' nucleotidase and phosphatase
b4175	1.12364	9.53578	22.6654	3.52908e-10	1.119e-08	13.5809	hflC	regulator of FtsH protease
b0812	1.54207	5.88427	22.3163	4.13363e-10	1.29293e-08	13.6976	dps	stationary phase nucleoid protein that sequesters iron and protects DNA from damage
b1019	-2.03102	5.04017	-22.314	4.138e-10	1.29293e-08	13.8272	efeB	heme-containing peroxidase/deferrochelatase
b3398	1.17727	7.34116	22.2988	4.16692e-10	1.29293e-08	13.5065	igaA	inner membrane protein - inhibits the Rcs signaling pathway
b3931	1.04625	9.26312	22.1809	4.39806e-10	1.35498e-08	13.3502	hslU	ATPase component of the HslVU protease
b2676	2.7467	4.14835	22.0974	4.57025e-10	1.39811e-08	13.8115	nrdF	ribonucleoside-diphosphate reductase 2 subunit beta
b3725	1.42059	7.19501	22.0624	4.64455e-10	1.4109e-08	13.4086	pstB	phosphate ABC transporter ATP binding subunit
b4041	1.06028	9.46713	21.9329	4.93133e-10	1.48187e-08	13.2216	plsB	glycerol-3-phosphate 1-O-acyltransferase
b1660	1.53969	6.4583	21.9263	4.94639e-10	1.48187e-08	13.4283	ydhC	putative transporter YdhC
b3416	1.56163	6.03718	21.7883	5.27469e-10	1.5694e-08	13.4183	malQ	4-alpha-glucanotransferase
b0573	6.66849	3.02352	21.443	6.20552e-10	1.8338e-08	12.9215	cusF	copper/silver export system periplasmic binding protein
b4593	3.52726	3.13645	21.3108	6.60832e-10	1.93963e-08	13.3861	ymgI	uncharacterized protein YmgI
b2210	-1.14278	8.28552	-21.1471	7.1469e-10	2.08363e-08	12.8638	mqo	malate:quinone oxidoreductase
b3600	-1.35512	9.79697	-21.0756	7.39708e-10	2.14219e-08	12.7768	mtlD	mannitol-1-phosphate 5-dehydrogenase
b2665	2.03461	4.79786	21.0143	7.61929e-10	2.19193e-08	13.2139	kbp	K(+) binding protein
b1063	1.67215	6.55215	20.9979	7.67999e-10	2.19486e-08	12.95	yceB	putative lipid-binding lipoprotein YceB
b3527	1.06403	7.82656	20.9525	7.85081e-10	2.22464e-08	12.7857	yhjJ	peptidase M16 family protein
b3098	1.26337	6.46798	20.9431	7.88663e-10	2.22464e-08	12.9196	yqjD	ribosome- and membrane-associated DUF883 domain-containing protein YqjD
b3601	-1.50864	8.36484	-20.9069	8.02672e-10	2.24e-08	12.7392	mtlR	transcriptional repressor MtlR
b1902	2.01867	4.41871	20.9023	8.04455e-10	2.24e-08	13.1995	ftnB	putative ferritin-like protein
b2278	-1.12072	7.22338	-20.8893	8.09575e-10	2.24e-08	12.8058	nuoL	NADH:quinone oxidoreductase subunit L
b2053	3.87474	3.14906	20.8063	8.42948e-10	2.30911e-08	13.1375	gmd	GDP-mannose 4%2C6-dehydratase
b3099	1.25909	6.513	20.7943	8.47897e-10	2.30911e-08	12.8361	yqjE	conserved inner membrane protein YqjE
b2674	3.20887	3.1564	20.7881	8.505e-10	2.30911e-08	13.1653	nrdI	dimanganese-tyrosyl radical cofactor maintenance flavodoxin NrdI
b2283	-0.991734	8.63651	-20.7551	8.64305e-10	2.33201e-08	12.6419	nuoG	NADH:quinone oxidoreductase subunit G
b4292	1.35792	6.10672	20.7368	8.72112e-10	2.33855e-08	12.8652	fecR	regulator for fec operon%2C periplasmic
b1056	1.98023	4.99896	20.6063	9.29815e-10	2.47799e-08	12.9783	yceI	protein YceI
b2060	4.09496	2.92835	20.5036	9.78176e-10	2.59097e-08	12.9366	wzc	protein-tyrosine kinase Wzc
b0767	1.07569	7.21847	20.4656	9.96816e-10	2.62435e-08	12.5779	pgl	6-phosphogluconolactonase
b1236	1.08356	9.02778	20.4144	1.02246e-09	2.67563e-08	12.4463	galU	UTP--glucose-1-phosphate uridylyltransferase
b3035	0.925272	9.75401	20.3073	1.07851e-09	2.80542e-08	12.3695	tolC	outer membrane channel TolC
b4376	1.665	6.24878	20.2449	1.11272e-09	2.87716e-08	12.5947	osmY	periplasmic chaperone OsmY
b3911	1.07209	7.91383	20.2268	1.12286e-09	2.88622e-08	12.3943	cpxA	sensory histidine kinase CpxA
b3961	1.05325	7.21656	20.0002	1.25874e-09	3.21644e-08	12.3265	oxyR	DNA-binding transcriptional dual regulator OxyR
b3942	1.00062	8.34178	19.8983	1.32562e-09	3.36754e-08	12.1912	katG	hydroperoxidase I
b3686	3.07548	4.29222	19.8283	1.37386e-09	3.4698e-08	12.6889	ibpB	small heat shock protein IbpB
b2282	-1.15752	6.67082	-19.7838	1.40548e-09	3.52913e-08	12.2751	nuoH	NADH:quinone oxidoreductase subunit H
b2572	1.00119	9.37444	19.7196	1.45253e-09	3.62633e-08	12.0568	rseA	anti-sigma factor
b0153	1.71935	6.66716	19.6494	1.50596e-09	3.71299e-08	12.2144	fhuB	iron(III) hydroxamate ABC transporter membrane subunit
b1244	-1.12077	7.73657	-19.6443	1.50994e-09	3.71299e-08	12.0904	oppB	murein tripeptide ABC transporter/oligopeptide ABC transporter inner membrane subunit OppB
b2107	1.78213	5.27497	19.6405	1.51289e-09	3.71299e-08	12.4177	rcnB	periplasmic protein involved in nickel/cobalt export
b1639	3.10605	4.04568	19.5987	1.54594e-09	3.77278e-08	12.5867	mliC	inhibitor of c-type lysozyme%2C putative lipoprotein
b4490	-1.65787	5.16363	-19.4951	1.63117e-09	3.95854e-08	12.3569	efeU	inactive ferrous iron permease EfeU%2C N-terminal fragment
b0605	0.876958	11.7595	19.4796	1.64438e-09	3.96843e-08	11.8706	ahpC	alkyl hydroperoxide reductase%2C AhpC component
b0452	1.44084	6.2172	19.3814	1.73069e-09	4.15367e-08	12.118	tesB	acyl-CoA thioesterase II
b0903	0.883607	10.5764	19.2509	1.8531e-09	4.39963e-08	11.7659	pflB	pyruvate formate-lyase
b2617	0.93649	7.99247	19.2506	1.85344e-09	4.39963e-08	11.8469	bamE	outer membrane protein assembly factor BamE
b1682	2.8573	4.07009	19.2118	1.89168e-09	4.46602e-08	12.3727	sufC	Fe-S cluster scaffold complex subunit SufC
b2288	-1.01947	8.01639	-19.0853	2.02243e-09	4.7489e-08	11.7543	nuoA	NADH:quinone oxidoreductase subunit A
b1321	1.97188	4.81124	19.0713	2.03751e-09	4.75858e-08	12.1789	ycjX	DUF463 domain-containing protein YcjX
b0684	0.974957	9.09439	19.0089	2.10617e-09	4.89263e-08	11.6626	fldA	flavodoxin 1
b4511	4.80804	2.50416	18.9833	2.135e-09	4.93321e-08	12.0293	ybdZ	enterobactin biosynthesis protein YbdZ
b4140	1.64063	4.74343	18.9353	2.19047e-09	5.01935e-08	12.1017	fxsA	protein FxsA
b0496	1.78236	5.21383	18.9226	2.20531e-09	5.01935e-08	12.0278	ybbP	putative ABC transporter membrane subunit YbbP
b2287	-0.921257	8.56184	-18.9212	2.20694e-09	5.01935e-08	11.6315	nuoB	NADH:quinone oxidoreductase subunit B
b1255	1.08282	6.89738	18.8712	2.2668e-09	5.12864e-08	11.7271	yciC	putative inner membrane protein
b4291	0.877838	11.2651	18.8224	2.32697e-09	5.23748e-08	11.5047	fecA	ferric citrate outer membrane transporter
b2284	-0.945885	8.18217	-18.8015	2.35315e-09	5.26912e-08	11.5802	nuoF	NADH:quinone oxidoreductase subunit F
b0400	1.41551	5.25118	18.5403	2.71045e-09	6.03804e-08	11.7905	phoR	sensory histidine kinase PhoR
b2286	-0.920506	9.33098	-18.4672	2.82072e-09	6.25164e-08	11.3402	nuoC	NADH:quinone oxidoreductase subunit CD
b4408	1.32547	7.55573	18.3198	3.05841e-09	6.74404e-08	11.3434	csrB	small regulatory RNA CsrB
b1634	-1.06117	8.99588	-18.2636	3.15486e-09	6.92156e-08	11.2297	dtpA	dipeptide/tripeptide:H(+) symporter DtpA
b2276	-0.972822	7.64193	-18.2272	3.21901e-09	7.02681e-08	11.2776	nuoN	NADH:quinone oxidoreductase subunit N
b2019	1.21236	6.04191	18.1908	3.28456e-09	7.13407e-08	11.4506	hisG	ATP phosphoribosyltransferase
b3404	1.08985	6.90056	18.1343	3.38923e-09	7.29617e-08	11.2934	envZ	sensory histidine kinase EnvZ
b2905	1.26703	6.23816	18.1246	3.40767e-09	7.29617e-08	11.3825	gcvT	aminomethyltransferase
b1684	3.4262	2.52125	18.1236	3.40958e-09	7.29617e-08	11.7499	sufA	iron-sulfur cluster insertion protein SufA
b0726	-0.855534	8.907	-18.0049	3.64314e-09	7.69489e-08	11.0758	sucA	subunit of E1(0) component of 2-oxoglutarate dehydrogenase
b0495	1.65829	4.6823	18.0011	3.65078e-09	7.69489e-08	11.5732	ybbA	putative ABC transporter ATP-binding protein YbbA
b3724	1.17101	7.2628	17.995	3.66329e-09	7.69489e-08	11.1721	phoU	negative regulator of the pho regulon
b1322	1.80683	4.47777	17.9933	3.66677e-09	7.69489e-08	11.604	ycjF	conserved inner membrane protein YcjF
b2904	1.48747	4.95667	17.9593	3.73755e-09	7.76636e-08	11.499	gcvH	glycine cleavage system H protein
b3928	0.899786	8.41167	17.9536	3.74941e-09	7.76636e-08	11.0631	zapB	cell division factor ZapB
b2052	3.90484	2.45853	17.9512	3.75446e-09	7.76636e-08	11.6165	fcl	GDP-L-fucose synthase
b1586	2.93672	4.03671	17.8315	4.01649e-09	8.26901e-08	11.6038	ynfD	DUF1161 domain-containing protein YnfD
b3553	0.981853	6.99262	17.776	4.14464e-09	8.49261e-08	11.0636	ghrB	glyoxylate reductase
b3795	-0.925773	7.47415	-17.7037	4.31827e-09	8.80685e-08	10.9734	yifK	putative transporter YifK
b0631	1.16168	6.54251	17.6696	4.40308e-09	8.92487e-08	11.059	ybeD	DUF493 domain-containing protein YbeD
b2344	-0.910369	9.00895	-17.6639	4.41724e-09	8.92487e-08	10.8641	fadL	long-chain fatty acid outer membrane channel/bacteriophage T2 receptor
b1702	1.37913	5.72419	17.611	4.5527e-09	9.15599e-08	11.1578	ppsA	phosphoenolpyruvate synthetase
b1852	1.02335	8.20569	17.5642	4.67648e-09	9.36158e-08	10.835	zwf	NADP(+)-dependent glucose-6-phosphate dehydrogenase
b0598	1.32351	5.92529	17.5302	4.76845e-09	9.50189e-08	11.073	cstA	carbon starvation protein A
b0005	1.91117	5.06442	17.3704	5.22904e-09	1.03303e-07	11.1401	yaaX	DUF2502 domain-containing protein YaaX
b0926	0.935177	7.53098	17.3695	5.23174e-09	1.03303e-07	10.7583	ycbK	DUF882 domain-containing protein YcbK
b0376	1.08952	6.10919	17.3518	5.28562e-09	1.03895e-07	10.9252	ampH	peptidoglycan DD-carboxypeptidase/peptidoglycan DD-endopeptidase
b0794	1.31923	5.22725	17.2997	5.44807e-09	1.06184e-07	11.048	ybhF	putative ABC exporter ATP binding subunit
b3096	1.08651	6.2955	17.2988	5.45096e-09	1.06184e-07	10.8632	mzrA	modulator protein MzrA
b3646	1.21262	5.60057	17.264	5.56237e-09	1.07624e-07	10.9589	yicG	conserved inner membrane protein YicG
b4290	0.86889	9.32016	17.2603	5.57446e-09	1.07624e-07	10.6022	fecB	ferric citrate ABC transporter periplasmic binding protein
b1436	3.89134	2.33571	17.1696	5.87769e-09	1.12976e-07	11.1787	yncJ	protein YncJ
b1414	1.41748	5.16907	17.0941	6.14392e-09	1.17573e-07	10.9327	ydcF	DUF218 domain-containing protein YdcF
b4241	1.3128	5.37511	17.0109	6.45289e-09	1.22944e-07	10.8416	treR	DNA-binding transcriptional repressor TreR
b1907	-1.70732	4.92508	-16.9641	6.63376e-09	1.25839e-07	10.9091	tyrP	tyrosine:H(+) symporter
b1136	-0.842208	9.55287	-16.9009	6.88718e-09	1.30078e-07	10.3673	icd	isocitrate dehydrogenase
b3932	0.92822	7.21223	16.8644	7.03849e-09	1.3236e-07	10.467	hslV	peptidase component of the HslVU protease
b3912	1.12803	7.45522	16.8052	7.29138e-09	1.36525e-07	10.4094	cpxR	DNA-binding transcriptional dual regulator CpxR
b2935	0.771758	9.99635	16.7926	7.34674e-09	1.36971e-07	10.2864	tktA	transketolase 1
b1246	-1.13659	6.03827	-16.6342	8.0799e-09	1.49996e-07	10.487	oppD	murein tripeptide ABC transporter/oligopeptide ABC transporter ATP binding subunit OppD
b1243	-0.735176	10.7742	-16.6124	8.18705e-09	1.50732e-07	10.1516	oppA	oligopeptide ABC transporter periplasmic binding protein
b1247	-1.09041	5.88471	-16.612	8.18892e-09	1.50732e-07	10.4968	oppF	murein tripeptide ABC transporter/oligopeptide ABC transporter ATP binding subunit OppF
b0008	0.779911	10.656	16.5886	8.30533e-09	1.52229e-07	10.1386	talB	transaldolase B
b2470	1.11269	5.91163	16.4914	8.8097e-09	1.60796e-07	10.4093	acrD	multidrug efflux pump RND permease AcrD
b1531	1.08757	6.23647	16.4553	9.00555e-09	1.63682e-07	10.3315	marA	DNA-binding transcriptional dual regulator MarA
b2903	1.03889	6.43211	16.3	9.90333e-09	1.7925e-07	10.1981	gcvP	glycine decarboxylase
b4148	1.13482	6.73695	16.2917	9.95417e-09	1.79423e-07	10.1524	gdx	guanidinium exporter
b0795	1.63473	4.39331	16.2178	1.04182e-08	1.87011e-07	10.5115	ybhG	HlyD_D23 family protein YbhG
b2285	-0.94911	7.1504	-16.1906	1.05949e-08	1.89401e-07	10.0349	nuoE	NADH:quinone oxidoreductase subunit E
b3955	-0.833456	7.56294	-16.1549	1.08314e-08	1.92835e-07	9.96959	eptC	phosphoethanolamine transferase EptC
b2426	0.829718	7.34433	16.1429	1.09128e-08	1.93491e-07	9.97815	ucpA	putative oxidoreductase
b1613	0.930436	6.83634	16.1127	1.11193e-08	1.96351e-07	10.0153	manA	mannose-6-phosphate isomerase
b3097	1.05619	6.84184	15.992	1.19884e-08	2.10841e-07	9.93595	yqjC	DUF1090 domain-containing protein YqjC
b2020	1.21636	5.78505	15.9718	1.21408e-08	2.1196e-07	10.0898	hisD	histidinal/histidinol dehydrogenase
b2160	1.0103	6.38911	15.9701	1.21541e-08	2.1196e-07	9.98271	yeiI	putative sugar kinase YeiI
b4232	0.861069	7.62143	15.9642	1.21984e-08	2.1196e-07	9.83382	fbp	fructose-1%2C6-bisphosphatase 1
b2281	-1.17789	5.38781	-15.946	1.23391e-08	2.13549e-07	10.1468	nuoI	NADH:quinone oxidoreductase subunit I
b2821	0.87594	7.18714	15.9234	1.25151e-08	2.15737e-07	9.84616	ptrA	protease 3
b2217	0.87146	8.52843	15.8471	1.31311e-08	2.25461e-07	9.70019	rcsB	DNA-binding transcriptional activator RcsB
b1163	-0.80333	7.51588	-15.8211	1.33482e-08	2.28286e-07	9.7469	bluF	blue light-responsive regulator of BluR
b0565	-1.29789	7.93491	-15.5841	1.55214e-08	2.64412e-07	9.55928	ompT	outer membrane protease VII (outer membrane protein 3b)
b2571	0.742006	8.82926	15.5758	1.56041e-08	2.64782e-07	9.50091	rseB	anti-sigma factor stabilizing protein RseB
b3179	0.800281	9.1784	15.5451	1.59152e-08	2.68459e-07	9.46871	rlmE	23S rRNA 2'-O-ribose U2552 methyltransferase
b3401	0.764613	8.21954	15.5422	1.59444e-08	2.68459e-07	9.50373	hslO	molecular chaperone Hsp33
b0753	2.93054	2.53173	15.5248	1.61238e-08	2.70431e-07	10.272	ybgS	PF13985 family protein YbgS
b2686	-1.21131	6.04807	-15.517	1.62058e-08	2.70761e-07	9.73873	emrB	multidrug efflux pump membrane subunit EmrB
b1661	-1.15745	5.92332	-15.4922	1.64663e-08	2.74059e-07	9.74157	cfa	cyclopropane fatty acyl phospholipid synthase
b0741	-0.686623	10.4011	-15.4535	1.68829e-08	2.79432e-07	9.37477	pal	peptidoglycan-associated outer membrane lipoprotein Pal
b4188	1.83405	3.59834	15.4503	1.69177e-08	2.79432e-07	10.1279	yjfN	protease activator
b2021	1.15829	5.44131	15.4214	1.7236e-08	2.83611e-07	9.77302	hisC	histidinol-phosphate aminotransferase
b3605	-1.49523	4.6197	-15.3913	1.75757e-08	2.88108e-07	9.91882	lldD	L-lactate dehydrogenase
b0851	0.970445	6.31288	15.2495	1.92765e-08	3.148e-07	9.49568	nfsA	NADPH-dependent nitroreductase NfsA
b3730	0.713051	8.60551	15.1779	2.02015e-08	3.28672e-07	9.22909	glmU	fused N-acetylglucosamine-1-phosphate uridyltransferase and glucosamine-1-phosphate acetyltransferase
b1739	1.5112	4.35795	15.1334	2.08016e-08	3.37172e-07	9.78111	osmE	osmotically-inducible lipoprotein OsmE
b2280	-1.22792	5.42633	-15.1273	2.0885e-08	3.37265e-07	9.57693	nuoJ	NADH:quinone oxidoreductase subunit J
b0891	1.06286	7.43617	15.0995	2.12716e-08	3.40987e-07	9.25098	lolA	outer membrane lipoprotein carrier protein
b0224	-0.760733	7.71565	-15.0953	2.1331e-08	3.40987e-07	9.22222	yafK	L%2CD-transpeptidase domain-containing protein YafK
b1945	-3.17954	2.08734	-15.0919	2.13784e-08	3.40987e-07	9.95964	fliM	flagellar motor switch protein FliM
b3892	-0.920082	8.29238	-15.0881	2.14327e-08	3.40987e-07	9.18203	fdoI	formate dehydrogenase O subunit gamma
b2277	-0.978403	6.80011	-15.0828	2.15079e-08	3.40987e-07	9.31183	nuoM	NADH:quinone oxidoreductase subunit M
b2351	-1.03713	7.48839	-15.0672	2.17307e-08	3.43267e-07	9.22614	yfdH	CPS-53 (KpLE1) prophage%3B bactoprenol glucosyl transferase
b0177	0.673364	10.9792	15.056	2.18929e-08	3.44575e-07	9.07974	bamA	outer membrane protein assembly factor BamA
b0804	2.52197	3.19782	14.988	2.29021e-08	3.59158e-07	9.88411	ybiX	PKHD-type hydroxylase YbiX
b0428	-0.706609	10.2118	-14.8897	2.44516e-08	3.82079e-07	8.9772	cyoE	heme O synthase
b0145	0.688565	9.31927	14.8821	2.45776e-08	3.82671e-07	8.99324	dksA	RNA polymerase-binding transcription factor DksA
b2477	0.727735	9.32448	14.8674	2.48203e-08	3.8507e-07	8.9825	bamC	outer membrane protein assembly factor BamC
b0927	0.769233	7.72659	14.8605	2.49354e-08	3.85478e-07	9.05011	gloC	hydroxyacylglutathione hydrolase GloC
b0407	0.743766	8.68198	14.8373	2.53258e-08	3.90126e-07	8.98107	yajC	Sec translocon accessory complex subunit YajC
b2595	0.72743	8.89768	14.8112	2.57732e-08	3.95614e-07	8.95434	bamD	outer membrane protein assembly factor BamD
b1821	-1.63421	3.94109	-14.7884	2.61705e-08	4.00298e-07	9.61914	mntP	Mn(2(+)) exporter
b2673	3.18209	2.18003	14.7645	2.65958e-08	4.03831e-07	9.76394	nrdH	glutaredoxin-like protein
b2435	0.803944	6.90611	14.7586	2.67012e-08	4.03831e-07	9.05712	amiA	N-acetylmuramoyl-L-alanine amidase A
b3407	0.74209	8.57961	14.7584	2.67055e-08	4.03831e-07	8.92764	yhgF	putative RNA-binding protein YhgF
b3400	0.821791	6.87052	14.7546	2.67733e-08	4.03831e-07	9.05879	hslR	heat shock protein Hsp15
b1535	1.53537	4.89443	14.7469	2.69123e-08	4.04523e-07	9.40933	dgcZ	diguanylate cyclase DgcZ
b3713	1.08156	6.14721	14.7322	2.71806e-08	4.07147e-07	9.15503	yieF	chromate reductase
b3110	-0.931375	6.09262	-14.7202	2.74026e-08	4.09061e-07	9.15586	cyuP	putative D/L-serine transporter
b1905	-1.136	6.11316	-14.7075	2.76377e-08	4.11159e-07	9.15009	ftnA	ferritin iron storage protein
b3251	0.709648	10.2565	14.6976	2.78247e-08	4.12527e-07	8.83585	mreB	dynamic cytoskeletal protein MreB
b0957	-0.67158	13.2999	-14.6914	2.79415e-08	4.12851e-07	8.76766	ompA	outer membrane porin A
b3011	0.828812	6.6286	14.6527	2.86829e-08	4.22368e-07	9.01635	yqhD	NADPH-dependent aldehyde reductase YqhD
b4293	1.03188	6.06613	14.6372	2.89864e-08	4.24211e-07	9.09794	fecI	RNA polymerase sigma factor FecI
b2413	1.02584	5.73684	14.6363	2.90034e-08	4.24211e-07	9.15525	cysZ	sulfate:H(+) symporter
b2495	0.991931	6.67717	14.6242	2.92425e-08	4.26273e-07	8.99222	yfgD	putative oxidoreductase YfgD
b0871	1.72859	4.00678	14.6179	2.93685e-08	4.26679e-07	9.48476	poxB	pyruvate oxidase
b2022	1.13746	5.43805	14.5674	3.03973e-08	4.39751e-07	9.1634	hisB	imidazoleglycerol-phosphate dehydratase/histidinol-phosphatase
b4554	1.52916	5.01881	14.5626	3.04967e-08	4.39751e-07	9.2515	yibT	protein YibT
b2099	1.26538	4.67403	14.559	3.0572e-08	4.39751e-07	9.3058	yegU	putative ADP-ribosylglycohydrolase YegU
b3599	-1.2087	10.0095	-14.5416	3.09368e-08	4.4353e-07	8.72708	mtlA	mannitol-specific PTS enzyme IICBA component
b1245	-1.16441	6.20676	-14.5162	3.1479e-08	4.49819e-07	8.99427	oppC	murein tripeptide ABC transporter/oligopeptide ABC transporter inner membrane subunit OppC
b1845	1.26506	5.59823	14.4804	3.22596e-08	4.59462e-07	9.07362	ptrB	oligopeptidase B
b3492	-0.822353	6.57257	-14.4274	3.34544e-08	4.74922e-07	8.8615	yhiN	putative oxidoreductase YhiN
b4271	-0.817842	6.88447	-14.4222	3.35746e-08	4.75075e-07	8.81535	intB	KpLE2 phage-like element%3B putative integrase
b1254	1.00534	7.01481	14.3807	3.4549e-08	4.87276e-07	8.76893	yciB	inner membrane protein
b3712	0.801624	6.95982	14.3612	3.50178e-08	4.92289e-07	8.7571	yieE	putative phosphopantetheinyl transferase
b0564	-2.75313	2.50819	-14.3535	3.52043e-08	4.93314e-07	9.49837	appY	DNA-binding transcriptional activator AppY
b4025	0.656244	9.61171	14.3329	3.57107e-08	4.98801e-07	8.58032	pgi	glucose-6-phosphate isomerase
b0570	1.09091	5.36999	14.2783	3.70888e-08	5.1639e-07	8.96095	cusS	sensory histidine kinase CusS
b0628	0.666157	9.68089	14.2721	3.72481e-08	5.16952e-07	8.53287	lipA	lipoyl synthase
b0237	0.651193	9.38038	14.2629	3.74858e-08	5.18593e-07	8.53357	pepD	peptidase D
b0434	0.680958	8.86076	14.2367	3.81766e-08	5.26474e-07	8.52923	yajG	putative lipoprotein YajG
b3893	-0.905491	9.22686	-14.2249	3.84904e-08	5.29121e-07	8.51011	fdoH	formate dehydrogenase O subunit beta
b0757	0.911607	5.99094	14.2187	3.86592e-08	5.29765e-07	8.79673	galK	galactokinase
b3150	0.814726	6.87854	14.1443	4.07207e-08	5.5626e-07	8.60396	yraP	divisome-associated lipoprotein YraP
b3095	0.931911	7.49728	14.1163	4.15278e-08	5.65507e-07	8.51846	yqjA	DedA family protein YqjA
b4492	-0.943797	5.97987	-14.0983	4.20585e-08	5.70944e-07	8.7136	ydbA	putative outer membrane protein%2C N-terminal fragment
b0606	0.705474	9.10521	14.0915	4.22586e-08	5.71874e-07	8.41128	ahpF	alkyl hydroperoxide reductase%2C AhpF component
b3151	-0.982328	6.43815	-14.0782	4.26543e-08	5.72769e-07	8.62295	yraQ	permease family protein YraQ
b1856	0.689906	8.05318	14.0765	4.2708e-08	5.72769e-07	8.44417	mepM	peptidoglycan DD-endopeptidase MepM
b2352	-1.26815	6.59914	-14.076	4.27203e-08	5.72769e-07	8.60697	yfdI	CPS-53 (KpLE1) prophage%3B serotype specific glucosyl transferase
b2100	1.34078	4.50723	14.0294	4.41485e-08	5.90096e-07	8.94828	yegV	putative sugar kinase YegV
b2059	3.68908	1.48841	14.0048	4.49208e-08	5.98576e-07	9.16066	wcaA	putative colanic acid biosynthesis glycosyl transferase
b2086	2.31873	3.07532	13.9853	4.55463e-08	6.05056e-07	9.18274	yegS	lipid kinase
b1891	-3.01191	2.06651	-13.9561	4.6499e-08	6.14997e-07	9.21476	flhC	DNA-binding transcriptional dual regulator FlhC
b4444	3.29296	2.62791	13.9537	4.65778e-08	6.14997e-07	9.21877	omrA	small regulatory RNA OmrA
b2436	0.867929	6.41361	13.9415	4.69803e-08	6.18432e-07	8.51534	hemF	coproporphyrinogen III oxidase
b0722	-1.00606	5.79252	-13.9039	4.82539e-08	6.33278e-07	8.60143	sdhD	succinate:quinone oxidoreductase%2C membrane protein SdhD
b2370	-1.06523	5.6179	-13.889	4.87685e-08	6.38104e-07	8.62445	evgS	sensory histidine kinase EvgS
b0453	1.24189	5.25566	13.8359	5.06534e-08	6.60775e-07	8.65227	ybaY	PF09619 family lipoprotein YbaY
b3926	0.824759	6.42192	13.8166	5.13555e-08	6.67929e-07	8.41679	glpK	glycerol kinase
b2741	0.968288	7.97878	13.7887	5.23928e-08	6.79386e-07	8.22978	rpoS	RNA polymerase%2C sigma S (sigma 38) factor
b0015	0.760036	7.96005	13.784	5.25689e-08	6.79641e-07	8.22523	dnaJ	chaperone protein DnaJ
b0027	0.764437	7.61595	13.7768	5.28427e-08	6.81154e-07	8.24481	lspA	lipoprotein signal peptidase
b1780	0.986586	5.92133	13.7582	5.35503e-08	6.88232e-07	8.45952	yeaD	putative aldose 1-epimerase YeaD
b2685	-0.841633	6.61076	-13.6721	5.69784e-08	7.28941e-07	8.28061	emrA	multidrug efflux pump membrane fusion protein EmrA
b1843	1.12131	4.98999	13.6668	5.71961e-08	7.28941e-07	8.57003	yobB	putative carbon-nitrogen hydrolase family protein YobB
b1048	0.678858	9.13903	13.6662	5.72212e-08	7.28941e-07	8.0813	opgG	osmoregulated periplasmic glucans (OPGs) biosynthesis protein G
b2378	0.654493	8.56146	13.5837	6.07455e-08	7.71574e-07	8.03649	lpxP	palmitoleoyl acyltransferase
b2218	0.672967	7.79789	13.5212	6.35764e-08	8.05178e-07	8.02941	rcsC	sensory histidine kinase RcsC
b2925	0.614192	10.4515	13.4877	6.51513e-08	8.22724e-07	7.90784	fbaA	fructose-bisphosphate aldolase class II
b3236	0.632147	8.75587	13.455	6.67311e-08	8.40232e-07	7.92683	mdh	malate dehydrogenase
b0211	0.795066	8.09838	13.4174	6.85987e-08	8.6125e-07	7.92843	mltD	membrane-bound lytic murein transglycosylase D
b1656	-0.63923	8.65558	-13.3697	7.105e-08	8.89456e-07	7.86349	sodB	superoxide dismutase (Fe)
b2670	1.18456	4.81317	13.3559	7.17767e-08	8.95971e-07	8.36345	alaE	L-alanine exporter
b1867	1.06372	5.13855	13.3372	7.27745e-08	9.05824e-07	8.28068	yecD	putative hydrolase
b0991	-0.853895	5.95189	-13.3288	7.32248e-08	9.08224e-07	8.11717	ymcE	protein YmcE
b4019	0.691221	7.21289	13.3258	7.33855e-08	9.08224e-07	7.92565	metH	cobalamin-dependent methionine synthase
b0758	0.853404	5.93617	13.3082	7.43481e-08	9.17523e-07	8.09917	galT	galactose-1-phosphate uridylyltransferase
b0429	-0.66139	8.91173	-13.3014	7.47268e-08	9.19585e-07	7.79943	cyoD	cytochrome bo3 ubiquinol oxidase subunit 4
b0733	0.614736	9.07275	13.2789	7.59837e-08	9.32411e-07	7.77541	cydA	cytochrome bd-I ubiquinol oxidase subunit I
b2317	1.10612	6.22708	13.2706	7.64502e-08	9.3522e-07	8.02534	dedA	DedA family protein DedA
b2834	0.73654	7.18434	13.2672	7.66463e-08	9.3522e-07	7.88219	tas	putative NADP(H)-dependent aldo-keto reductase Tas
b3539	-0.874107	5.99929	-13.2634	7.68586e-08	9.3522e-07	8.05709	yhjV	putative transporter YhjV
b0439	0.612593	9.98455	13.245	7.79203e-08	9.45491e-07	7.72447	lon	Lon protease
b0583	3.41919	2.53729	13.2122	7.98424e-08	9.65759e-07	8.68363	entD	phosphopantetheinyl transferase EntD
b0577	0.772387	6.52056	13.209	8.00353e-08	9.65759e-07	7.92105	ybdG	miniconductance mechanosensitive channel YbdG
b3100	1.26314	6.01621	13.197	8.07553e-08	9.71062e-07	8.00874	yqjK	conserved protein YqjK
b2062	4.46174	2.02755	13.1942	8.09219e-08	9.71062e-07	8.64018	wza	outer membrane polysaccharide export protein Wza
b2963	0.811621	6.96504	13.1754	8.20686e-08	9.80653e-07	7.83434	mltC	membrane-bound lytic murein transglycosylase C
b3192	0.660941	7.83058	13.1737	8.21726e-08	9.80653e-07	7.74867	mlaC	intermembrane phospholipid transport system - periplasmic binding protein
b4160	0.648118	8.52369	13.16	8.30128e-08	9.87967e-07	7.69927	psd	phosphatidylserine decarboxylase proenzyme
b1599	1.01344	5.50036	13.1009	8.67738e-08	1.0299e-06	8.01941	mdtI	multidrug/spermidine efflux pump membrane subunit MdtI
b4208	-0.644454	8.05555	-13.0067	9.31571e-08	1.10008e-06	7.59937	cycA	serine/alanine/glycine/cycloserine:H(+)symporter
b2551	0.631862	9.50276	13.0032	9.34021e-08	1.10008e-06	7.53958	glyA	serine hydroxymethyltransferase
b3919	0.621781	9.14757	13.0026	9.34463e-08	1.10008e-06	7.5487	tpiA	triose-phosphate isomerase
b3891	-0.694403	8.50038	-12.9907	9.42911e-08	1.10703e-06	7.56336	fdhE	formate dehydrogenase formation protein
b1422	-0.758751	6.54672	-12.9809	9.49896e-08	1.1099e-06	7.73504	ydcI	putative DNA-binding transcriptional repressor YdcI
b3431	1.04318	5.41755	12.9801	9.50468e-08	1.1099e-06	7.93776	glgX	limit dextrin alpha-1%2C6-glucohydrolase
b0632	0.658509	8.76342	12.9716	9.56579e-08	1.11404e-06	7.53593	dacA	D-alanyl-D-alanine carboxypeptidase DacA
b2156	-0.69983	7.12795	-12.9326	9.85297e-08	1.14442e-06	7.61843	lysP	lysine:H(+) symporter
b1271	1.03388	5.10972	12.9125	1.00047e-07	1.15895e-06	7.94358	yciK	putative oxidoreductase
b2050	3.45448	1.78051	12.8647	1.03757e-07	1.19817e-06	8.41454	wcaI	putative colanic biosynthesis glycosyl transferase
b0168	0.626994	8.89875	12.8619	1.03985e-07	1.19817e-06	7.44053	map	methionine aminopeptidase
b2422	1.64696	3.38806	12.842	1.05573e-07	1.21283e-06	8.2369	cysA	sulfate/thiosulfate ABC transporter ATP binding subunit
b0149	0.660664	8.79524	12.839	1.05816e-07	1.21283e-06	7.42527	mrcB	peptidoglycan glycosyltransferase/peptidoglycan DD-transpeptidase MrcB
b0870	0.79885	6.24112	12.8325	1.06345e-07	1.21569e-06	7.65801	ltaE	low-specificity L-threonine aldolase
b3191	0.698952	6.82635	12.8253	1.06932e-07	1.21919e-06	7.56344	mlaB	intermembrane phospholipid transport system protein MlaB
b0465	0.636674	8.94611	12.821	1.07284e-07	1.22e-06	7.40505	mscK	potassium dependent%2C small conductance mechanosensitive channel
b2666	2.38994	3.24516	12.7437	1.13835e-07	1.29113e-06	8.21158	yqaE	Pmp3 family protein
b2318	0.879675	5.97772	12.7112	1.16726e-07	1.32046e-06	7.60531	truA	tRNA pseudouridine(38-40) synthase
b1938	-3.225	1.65997	-12.7024	1.17523e-07	1.32603e-06	8.28974	fliF	flagellar basal-body MS-ring and collar protein
b3430	0.959168	5.3374	12.6969	1.18019e-07	1.32817e-06	7.71851	glgC	glucose-1-phosphate adenylyltransferase
b2132	0.789863	7.33303	12.6763	1.19915e-07	1.34549e-06	7.38241	bglX	beta-D-glucoside glucohydrolase%2C periplasmic
b1779	0.542576	12.7512	12.6735	1.20178e-07	1.34549e-06	7.19337	gapA	glyceraldehyde-3-phosphate dehydrogenase A
b1783	1.49665	3.94546	12.6628	1.21175e-07	1.35317e-06	7.98558	yeaG	protein kinase YeaG
b0990	-0.625095	10.3447	-12.6545	1.21951e-07	1.35374e-06	7.22983	cspG	cold shock protein CspG
b4111	-0.721428	8.3325	-12.6536	1.22036e-07	1.35374e-06	7.29173	proP	osmolyte:H(+) symporter ProP
b0679	-0.605964	8.44004	-12.6523	1.22161e-07	1.35374e-06	7.28462	nagE	N-acetylglucosamine specific PTS enzyme IIABC component
b2937	0.654167	8.44614	12.6228	1.24984e-07	1.38151e-06	7.25874	speB	agmatinase
b3820	-0.981027	5.15737	-12.613	1.2594e-07	1.38853e-06	7.6897	yigI	putative thioesterase YigI
b1277	0.71168	7.15096	12.5967	1.27549e-07	1.40126e-06	7.33358	ribA	GTP cyclohydrolase 2
b0402	-0.677123	7.27175	-12.5948	1.27739e-07	1.40126e-06	7.32117	proY	putative transporter ProY
b4289	0.705452	8.29728	12.5609	1.31155e-07	1.43511e-06	7.21402	fecC	ferric citrate ABC transporter membrane subunit FecC
b4218	-0.850603	7.02743	-12.5468	1.32604e-07	1.44731e-06	7.31117	ytfL	putative inner membrane protein
b4466	0.944834	6.22053	12.4636	1.4152e-07	1.54013e-06	7.35614	yghJ	putative lipoprotein YghJ
b2579	1.3911	3.84951	12.4609	1.41817e-07	1.54013e-06	7.83283	grcA	stress-induced alternate pyruvate formate-lyase subunit
b3894	-0.642797	11.342	-12.4313	1.45158e-07	1.57249e-06	7.01797	fdoG	formate dehydrogenase O subunit alpha
b0176	0.575955	9.2915	12.428	1.45535e-07	1.57265e-06	7.06378	rseP	intramembrane zinc metalloprotease
b4445	3.52443	1.54848	12.2773	1.63959e-07	1.76734e-06	7.95852	omrB	small regulatory RNA OmrB
b0438	0.626453	9.88409	12.2497	1.67606e-07	1.80218e-06	6.89552	clpX	ATP-dependent Clp protease ATP-binding subunit ClpX
b1015	-0.719676	6.60855	-12.1649	1.79355e-07	1.92375e-06	7.0372	putP	proline:Na(+) symporter
b0721	-0.620399	7.5771	-12.1577	1.80403e-07	1.93022e-06	6.91721	sdhC	succinate:quinone oxidoreductase%2C membrane protein SdhC
b2763	1.34871	3.86592	12.1364	1.83507e-07	1.95861e-06	7.55471	cysI	sulfite reductase%2C hemoprotein subunit
b1732	2.00218	2.83582	12.1009	1.88831e-07	2.0105e-06	7.72916	katE	catalase II
b2943	0.694046	7.07661	12.0747	1.92851e-07	2.04828e-06	6.89365	galP	galactose:H(+) symporter
b0607	1.0375	6.00468	12.0687	1.93801e-07	2.05335e-06	7.05654	uspG	universal stress protein G
b0464	1.13068	5.13688	12.0347	1.99196e-07	2.10152e-06	7.1999	acrR	DNA-binding transcriptional repressor AcrR
b2388	1.20721	6.19928	12.0307	1.99838e-07	2.10152e-06	6.99431	glk	glucokinase
b3178	0.576746	11.3278	12.0296	2.00013e-07	2.10152e-06	6.67017	ftsH	ATP-dependent zinc metalloprotease FtsH
b0430	-0.575964	9.3062	-12.028	2.00283e-07	2.10152e-06	6.7172	cyoC	cytochrome bo3 ubiquinol oxidase subunit 3
b3426	-0.847787	7.43605	-12.0195	2.01659e-07	2.11086e-06	6.81281	glpD	aerobic glycerol 3-phosphate dehydrogenase
b4159	0.696889	7.85741	11.9911	2.06364e-07	2.15492e-06	6.74852	mscM	miniconductance mechanosensitive channel MscM
b0028	0.626375	7.13581	11.9311	2.16681e-07	2.25723e-06	6.75983	fkpB	peptidyl-prolyl cis-trans isomerase FkpB
b2419	1.50312	4.27377	11.9062	2.21131e-07	2.29806e-06	7.27956	yfeK	protein YfeK
b0892	0.601549	7.58931	11.9031	2.21698e-07	2.29846e-06	6.69061	rarA	recombination factor
b3428	0.67338	6.7563	11.8964	2.22906e-07	2.30244e-06	6.77677	glgP	glycogen phosphorylase
b3364	-0.723174	6.6724	-11.8952	2.23142e-07	2.30244e-06	6.7913	tsgA	putative transporter TsgA
b2169	0.625267	9.51351	11.8836	2.25259e-07	2.31878e-06	6.5839	fruB	fructose-specific PTS multiphosphoryl transfer protein FruB
b4380	2.11745	2.90867	11.8506	2.3143e-07	2.37209e-06	7.51037	yjjI	DUF3029 domain-containing protein YjjI
b2051	4.10507	0.792968	11.8501	2.3153e-07	2.37209e-06	7.50515	gmm	GDP-mannose mannosyl hydrolase
b0755	0.637419	9.29153	11.8424	2.32994e-07	2.38147e-06	6.55321	gpmA	2%2C3-bisphosphoglycerate-dependent phosphoglycerate mutase
b3729	0.6724	9.13604	11.838	2.33847e-07	2.38458e-06	6.55374	glmS	L-glutamine--D-fructose-6-phosphate aminotransferase
b2395	-0.668894	7.56013	-11.8123	2.38825e-07	2.42963e-06	6.61524	pdeA	putative c-di-GMP phosphodiesterase PdeA
b4243	0.578847	7.94902	11.8032	2.4063e-07	2.44032e-06	6.57494	ridA	enamine/imine deaminase%2C redox regulated chaperone
b0571	1.21931	4.95346	11.8013	2.40999e-07	2.44032e-06	7.03527	cusR	DNA-binding transcriptional activator CusR
b3819	-0.738321	6.05366	-11.7935	2.42565e-07	2.45047e-06	6.80171	rarD	putative transporter RarD
b2279	-1.22555	4.21799	-11.7895	2.43365e-07	2.45285e-06	7.18512	nuoK	NADH:quinone oxidoreductase subunit K
b2570	0.607504	7.72533	11.7752	2.46238e-07	2.47606e-06	6.56595	rseC	protein RseC
b0029	0.58042	8.05053	11.7627	2.48796e-07	2.49589e-06	6.53236	ispH	1-hydroxy-2-methyl-2-(E)-butenyl 4-diphosphate reductase
b1111	0.990289	4.88419	11.76	2.49359e-07	2.49589e-06	7.00677	comR	DNA-binding transcriptional repressor ComR
b4568	1.32216	4.30203	11.7477	2.51895e-07	2.51548e-06	7.12792	ytjA	DUF1328 domain-containing protein YtjA
b3338	-1.05872	5.16378	-11.7172	2.58352e-07	2.57274e-06	6.91727	chiA	endochitinase
b4155	-0.789822	6.2924	-11.715	2.58813e-07	2.57274e-06	6.69135	epmA	EF-P-lysine lysyltransferase
b1532	0.977274	4.8519	11.7029	2.61414e-07	2.59266e-06	6.96265	marB	multiple antibiotic resistance protein
b4029	1.88467	2.92693	11.6926	2.6366e-07	2.60897e-06	7.36212	yjbH	YjbH family protein
b3432	0.693761	6.54826	11.6619	2.7048e-07	2.67037e-06	6.59741	glgB	1%2C4-alpha-glucan branching enzyme
b0954	-0.607885	9.30126	-11.6451	2.74284e-07	2.70179e-06	6.3762	fabA	beta-hydroxyacyl-acyl carrier protein dehydratase/isomerase
b2061	4.6401	0.324077	11.622	2.79618e-07	2.7481e-06	7.17475	wzb	protein-tyrosine phosphatase
b0886	0.64744	6.9834	11.6051	2.83607e-07	2.78101e-06	6.48635	cydC	glutathione/L-cysteine ABC exporter subunit CydC
b1915	-0.877701	5.35249	-11.5935	2.86367e-07	2.80176e-06	6.76248	yecF	DUF2594 domain-containing protein YecF
b3417	1.06277	4.60448	11.5375	3.00112e-07	2.92963e-06	6.8686	malP	maltodextrin phosphorylase
b3784	-0.545687	8.40024	-11.5229	3.03831e-07	2.95928e-06	6.29769	rfe	UDP-N-acetylglucosamine--undecaprenyl-phosphate N-acetylglucosaminephosphotransferase
b0843	1.30765	3.93513	11.5116	3.06728e-07	2.98082e-06	6.99301	ybjH	uncharacterized protein YbjH
b0734	0.562149	8.84566	11.5019	3.09234e-07	2.99847e-06	6.25963	cydB	cytochrome bd-I ubiquinol oxidase subunit II
b2340	0.608902	7.14114	11.4331	3.27742e-07	3.17085e-06	6.31064	sixA	phosphohistidine phosphatase
b3166	-0.559868	8.37388	-11.3989	3.37383e-07	3.25687e-06	6.18546	truB	tRNA pseudouridine(55) synthase
b2057	3.17113	1.44914	11.3755	3.44147e-07	3.3148e-06	7.24183	wcaC	putative colanic acid biosynthesis glycosyl transferase
b0643	1.36206	4.0268	11.3412	3.54346e-07	3.40548e-06	6.82244	ybeL	DUF1451 domain-containing protein YbeL
b4359	0.595752	7.64559	11.3275	3.58503e-07	3.43581e-06	6.16479	opgB	phosphoglycerol transferase I
b0104	0.581676	7.88452	11.3256	3.59083e-07	3.43581e-06	6.14514	guaC	GMP reductase
b1426	1.33674	4.26287	11.3103	3.63806e-07	3.47335e-06	6.74375	ydcH	protein YdcH
b3783	-0.552134	11.388	-11.2925	3.69369e-07	3.5167e-06	6.00303	rho	transcription termination factor Rho
b4553	1.94332	2.83572	11.2907	3.69966e-07	3.5167e-06	7.02666	ysaB	putative lipoprotein YsaB
b1270	1.02628	4.90819	11.2862	3.71366e-07	3.52117e-06	6.57459	btuR	cobinamide/cobalamin adenosyltransferase
b4476	-0.757156	5.98222	-11.2841	3.72058e-07	3.52117e-06	6.35274	gntU	low-affinity gluconate transporter
b1611	0.65315	6.45256	11.2784	3.73866e-07	3.53059e-06	6.26123	fumC	fumarase C
b2431	0.58443	7.576	11.2733	3.7552e-07	3.53852e-06	6.12024	yfeX	porphyrinogen peroxidase
b4000	0.53209	10.2573	11.2568	3.80851e-07	3.58099e-06	5.99582	hupA	DNA-binding protein HU-alpha
b0759	0.668651	6.66807	11.2534	3.81961e-07	3.58367e-06	6.20596	galE	UDP-glucose 4-epimerase
b4027	3.46713	1.35869	11.244	3.8507e-07	3.60506e-06	7.12573	yjbF	lipoprotein YjbF
b2573	0.562333	8.68898	11.2074	3.97357e-07	3.71208e-06	5.9934	rpoE	RNA polymerase sigma E factor
b3612	0.56191	9.38584	11.2011	3.99528e-07	3.72436e-06	5.96547	gpmM	2%2C3-bisphosphoglycerate-independent phosphoglycerate mutase
b2023	0.985419	4.58572	11.1909	4.03076e-07	3.74938e-06	6.55415	hisH	imidazole glycerol phosphate synthase subunit HisH
b1076	-2.35131	2.19314	-11.1678	4.11176e-07	3.80645e-06	7.02698	flgE	flagellar hook protein FlgE
b0815	-0.563144	7.87264	-11.1672	4.11376e-07	3.80645e-06	5.99989	opgE	phosphoethanolamine transferase
b4139	0.586668	7.73771	11.1659	4.1184e-07	3.80645e-06	6.00718	aspA	aspartate ammonia-lyase
b4028	3.0417	1.25147	11.1468	4.18721e-07	3.86183e-06	7.0463	yjbG	capsule biosynthesis GfcC family protein YjbG
b0756	0.609334	7.08302	11.1165	4.29848e-07	3.95606e-06	6.02348	galM	galactose-1-epimerase
b1740	0.609539	6.87939	11.1062	4.33703e-07	3.9831e-06	6.03873	nadE	NAD synthetase%2C NH3-dependent
b3604	-1.07965	4.45708	-11.0867	4.41108e-07	4.04256e-06	6.49276	lldR	DNA-binding transcriptional dual regulator LldR
b4348	-0.786832	6.25905	-11.0545	4.5366e-07	4.14884e-06	6.09025	hsdS	type I restriction enzyme EcoKI specificity protein
b1892	-2.82529	1.95772	-11.0324	4.62478e-07	4.22059e-06	6.93905	flhD	DNA-binding transcriptional dual regulator FlhD
b2480	0.565955	8.60491	11.0173	4.68603e-07	4.26753e-06	5.81786	bcp	thiol peroxidase
b0437	0.592313	8.88628	11.01	4.71597e-07	4.28581e-06	5.80054	clpP	ATP-dependent Clp protease proteolytic subunit
b4242	0.635005	7.06704	11.001	4.7534e-07	4.31081e-06	5.91664	mgtA	Mg(2(+)) importing P-type ATPase
b0002	0.566355	7.8572	10.9628	4.91519e-07	4.44084e-06	5.80657	thrA	fused aspartate kinase/homoserine dehydrogenase 1
b4219	0.95895	4.63275	10.9623	4.91722e-07	4.44084e-06	6.32977	msrA	methionine sulfoxide reductase A
b2751	1.47836	3.3618	10.9528	4.9587e-07	4.469e-06	6.60278	cysN	sulfate adenylyltransferase subunit 1
b2418	-1.06285	4.70087	-10.9081	5.15757e-07	4.63861e-06	6.27164	pdxK	pyridoxal kinase I
b1612	-0.684741	6.50779	-10.8718	5.32509e-07	4.77938e-06	5.87364	fumA	fumarase A
b2808	-0.687959	6.05287	-10.8635	5.36465e-07	4.79447e-06	5.94239	gcvA	DNA-binding transcriptional dual regulator GcvA
b0660	0.603369	7.70726	10.8625	5.36933e-07	4.79447e-06	5.72212	ybeZ	PhoH-like protein
b1075	-3.32489	1.26349	-10.8613	5.37501e-07	4.79447e-06	6.79911	flgD	flagellar biosynthesis%2C initiation of hook assembly
b2350	-0.737529	6.30438	-10.8454	5.45113e-07	4.8524e-06	5.88242	yfdG	CPS-53 (KpLE1) prophage%3B putative bactoprenol-linked glucose translocase
b3868	0.721725	6.35678	10.8397	5.47861e-07	4.86689e-06	5.86416	glnG	DNA-binding transcriptional dual regulator NtrC
b4751	1.16929	4.03844	10.8358	5.49794e-07	4.87409e-06	6.34364	yoaL	protein YoaL
b1823	-0.667438	9.1441	-10.8296	5.52793e-07	4.8907e-06	5.62072	cspC	stress protein%2C member of the CspA family
b0411	-0.576564	8.85686	-10.7699	5.82906e-07	5.14664e-06	5.57237	tsx	nucleoside-specific channel-forming protein Tsx
b1815	1.10038	4.10278	10.7664	5.84751e-07	5.15246e-06	6.26225	pdeD	putative c-di-GMP phosphodiesterase PdeD
b4723	-0.616135	8.47065	-10.7414	5.9794e-07	5.258e-06	5.56059	ymcF	protein YmcF
b3234	0.716894	6.00485	10.7359	6.00856e-07	5.27296e-06	5.82542	degQ	periplasmic serine endoprotease
b0963	0.673076	6.13294	10.7214	6.08719e-07	5.3312e-06	5.78727	mgsA	methylglyoxal synthase
b2024	1.08236	4.80647	10.7134	6.1311e-07	5.35885e-06	6.05917	hisA	1-(5-phosphoribosyl)-5-[(5-phosphoribosylamino)methylideneamino]imidazole-4-carboxamide isomerase
b0689	-0.962073	4.66824	-10.6983	6.21441e-07	5.42077e-06	6.07539	ybfP	lipoprotein YbfP
b0727	-0.549775	8.51153	-10.6706	6.37061e-07	5.54588e-06	5.48965	sucB	dihydrolipoyltranssuccinylase
b4748	-0.960686	5.24392	-10.6458	6.51448e-07	5.65978e-06	5.90199	ynfT	Qin prophage%3B protein YnfT
b2752	1.99553	2.05842	10.6426	6.53303e-07	5.66457e-06	6.55121	cysD	sulfate adenylyltransferase subunit 2
b0193	-1.18019	4.04019	-10.6243	6.64181e-07	5.74741e-06	6.1473	yaeF	peptidase C92 family protein
b1951	2.74972	2.84256	10.6079	6.74058e-07	5.82129e-06	6.43735	rcsA	DNA-binding transcriptional activator RcsA
b2215	-0.467742	13.0469	-10.6031	6.77012e-07	5.8352e-06	5.31083	ompC	outer membrane porin C
b1679	1.86114	2.93314	10.5865	6.87217e-07	5.91143e-06	6.35496	sufE	sulfur acceptor for SufS cysteine desulfurase
b1603	0.614021	7.33014	10.5718	6.9644e-07	5.97893e-06	5.47383	pntA	pyridine nucleotide transhydrogenase subunit alpha
b2058	3.47353	0.385487	10.5675	6.99099e-07	5.98991e-06	6.46708	wcaB	putative colanic acid biosynthesis acyl transferase
b0688	0.493251	9.72852	10.5404	7.16499e-07	6.1256e-06	5.32306	pgm	phosphoglucomutase
b3934	0.593412	7.26711	10.537	7.18717e-07	6.1256e-06	5.44602	cytR	DNA-binding transcriptional repressor CytR
b3493	0.510155	8.89361	10.5363	7.19166e-07	6.1256e-06	5.34243	pitA	metal phosphate:H(+) symporter PitA
b3558	-0.8293	5.21361	-10.528	7.24617e-07	6.15995e-06	5.7894	insK	IS150 conserved protein InsB
b4640	-1.54819	3.09476	-10.5211	7.29174e-07	6.18658e-06	6.25624
b3171	-1.27014	5.40159	-10.5133	7.34382e-07	6.21862e-06	5.75001	metY	tRNA-Met
b3429	0.749606	5.62763	10.5035	7.4097e-07	6.25679e-06	5.67327	glgA	glycogen synthase
b4170	0.569218	8.18017	10.5023	7.41769e-07	6.25679e-06	5.34038	mutL	DNA mismatch repair protein MutL
b2863	-0.986686	5.35582	-10.4921	7.4868e-07	6.30284e-06	5.72963	ygeQ	protein YgeQ
b2369	-0.964482	4.71458	-10.488	7.51471e-07	6.3141e-06	5.86137	evgA	DNA-binding transcriptional activator EvgA
b3747	-0.693915	6.218	-10.4808	7.56405e-07	6.34329e-06	5.54186	kup	K(+):H(+) symporter Kup
b2249	-0.630109	6.25767	-10.4521	7.76524e-07	6.49946e-06	5.50485	yfaY	IPR008135 CinA family protein YfaY
b3798	-0.647301	8.17708	-10.4422	7.8357e-07	6.54583e-06	5.28279	leuT	tRNA-Leu
b0065	0.812155	6.17885	10.4396	7.85434e-07	6.5488e-06	5.50666	yabI	DedA family protein YabI
b3160	0.811689	5.48286	10.3996	8.14708e-07	6.77987e-06	5.60186	yhbW	putative luciferase-like monooxygenase
b2026	0.803982	5.17201	10.352	8.51163e-07	7.06788e-06	5.62004	hisI	putative bifunctional phosphoribosyl-AMP cyclohydrolase/phosphoribosyl-ATP pyrophosphatase
b1251	0.874361	4.82475	10.3502	8.52571e-07	7.06788e-06	5.69449	yciI	protein YciI
b2054	3.6196	0.700757	10.3287	8.69649e-07	7.19573e-06	6.29664	wcaF	putative acyl transferase
b2293	0.681375	6.08203	10.3222	8.74871e-07	7.22517e-06	5.40459	hxpA	hexitol phosphatase A
b0118	-0.480743	10.245	-10.3022	8.91237e-07	7.34637e-06	5.07392	acnB	hypothetical protein
b0053	0.51268	9.4859	10.2951	8.97065e-07	7.3804e-06	5.08555	surA	peptidyl-prolyl cis-trans isomerase SurA
b3252	0.534571	7.3877	10.2842	9.0617e-07	7.44121e-06	5.18219	csrD	regulator of CsrB and CsrC decay
b2817	0.555747	7.29669	10.2779	9.11506e-07	7.47091e-06	5.18518	amiC	N-acetylmuramoyl-L-alanine amidase C
b0222	0.537627	7.60534	10.2689	9.19115e-07	7.51908e-06	5.14723	lpcA	D-sedoheptulose 7-phosphate isomerase
b1844	0.867071	4.77989	10.2231	9.59113e-07	7.83155e-06	5.57735	exoX	exonuclease X
b1655	-1.25011	4.00519	-10.1996	9.80378e-07	7.99017e-06	5.74165	mepH	peptidoglycan DD-endopeptidase MepH
b1601	1.27882	3.37583	10.1967	9.82983e-07	7.9964e-06	5.86593	tqsA	autoinducer 2 exporter
b0655	0.562759	6.99934	10.1515	1.02539e-06	8.32577e-06	5.09123	gltI	glutamate/aspartate ABC transporter periplasmic binding protein
b0880	1.16264	4.10015	10.1462	1.03056e-06	8.35215e-06	5.65777	cspD	DNA replication inhibitor
b3665	-0.806515	5.0772	-10.1413	1.03524e-06	8.37448e-06	5.43322	adeD	adenine deaminase
b0793	1.2195	3.78958	10.1327	1.04363e-06	8.42663e-06	5.71327	ybhS	putative ABC exporter membrane subunit YbhS
b3440	0.63416	6.28993	10.1114	1.0647e-06	8.58081e-06	5.15488	yhhX	putative oxidoreductase YhhX
b4133	-0.911422	4.71328	-10.0569	1.12082e-06	9.01636e-06	5.43016	cadC	DNA-binding transcriptional activator CadC
b1530	0.860613	5.51156	10.049	1.12914e-06	9.06653e-06	5.24457	marR	DNA-binding transcriptional repressor MarR
b3526	0.804206	6.20089	10.0461	1.13228e-06	9.07496e-06	5.10691	kdgK	2-dehydro-3-deoxygluconokinase
b3105	0.826579	5.7304	10.0365	1.14252e-06	9.1402e-06	5.18648	yhaJ	DNA-binding transcriptional activator YhaJ
b0131	0.49585	7.69915	10.0316	1.1479e-06	9.16634e-06	4.8986	panD	aspartate 1-decarboxylase proenzyme
b0525	0.511594	8.92298	10.0194	1.16122e-06	9.2557e-06	4.82207	ppiB	peptidyl-prolyl cis-trans isomerase B
b4288	0.568977	7.61124	10.0018	1.18069e-06	9.39365e-06	4.87572	fecD	ferric citrate ABC transporter membrane subunit FecD
b4287	0.522038	7.79386	9.97899	1.20656e-06	9.57835e-06	4.83758	fecE	ferric citrate ABC transporter ATP binding subunit
b1633	-0.577155	6.62145	-9.97598	1.21002e-06	9.57835e-06	4.96594	nth	endonuclease III
b3092	1.11481	4.38636	9.97554	1.21052e-06	9.57835e-06	5.42067	uxaC	D-glucoronate/D-galacturonate isomerase
b0792	1.05915	3.86601	9.96472	1.22304e-06	9.65977e-06	5.52264	ybhR	putative ABC exporter membrane subunit YbhR
b4051	0.918365	4.47167	9.95601	1.23321e-06	9.72246e-06	5.37626	qorA	putative quinone oxidoreductase 1
b0187	1.14021	4.63093	9.94399	1.24741e-06	9.8166e-06	5.33524	yaeR	VOC domain-containing protein YaeR
b2025	0.824489	4.91638	9.93138	1.2625e-06	9.91734e-06	5.25093	hisF	imidazole glycerol phosphate synthase subunit HisF
b0748	-0.668159	7.70552	-9.92842	1.26606e-06	9.92736e-06	4.7955	lysZ	tRNA-Lys
b0203	-1.45145	3.38788	-9.9252	1.26996e-06	9.93998e-06	5.60449	alaV	tRNA-Ala
b2716	1.37888	4.3333	9.90283	1.29737e-06	1.01291e-05	5.36714	ascB	6-phospho-beta-glucosidase AscB
b1791	-1.03995	3.92456	-9.90169	1.29879e-06	1.01291e-05	5.45045	nimT	2-nitroimidazole exporter
b3709	2.10296	1.77559	9.87191	1.33634e-06	1.04034e-05	5.85379	tnaB	tryptophan:H(+) symporter TnaB
b0440	-0.560896	9.23148	-9.85399	1.3595e-06	1.05647e-05	4.64222	hupB	DNA-binding protein HU-beta
b1640	1.01069	4.3673	9.84836	1.36688e-06	1.06031e-05	5.29194	anmK	anhydro-N-acetylmuramic acid kinase
b1209	0.624958	5.94721	9.83601	1.38319e-06	1.07015e-05	4.93333	lolB	outer membrane lipoprotein LolB
b3862	-0.884828	5.4405	-9.83502	1.3845e-06	1.07015e-05	5.04544	yihG	putative acyltransferase YihG
b0841	0.726878	5.75134	9.83223	1.38822e-06	1.07113e-05	4.9696	ybjG	undecaprenyl pyrophosphate phosphatase
b2055	3.48466	1.59693	9.81828	1.40697e-06	1.08367e-05	5.85075	wcaE	putative colanic acid biosynthesis glycosyl transferase
b2958	0.833832	6.13814	9.80982	1.41848e-06	1.0906e-05	4.87527	yggN	putative EcfF
b1131	0.493091	8.25839	9.80711	1.42219e-06	1.09152e-05	4.63042	purB	adenylosuccinate lyase
b2982	-1.10168	4.20008	-9.8028	1.42812e-06	1.09288e-05	5.29095	insH-9	IS5 transposase and trans-activator
b3495	0.49037	7.57025	9.80216	1.42899e-06	1.09288e-05	4.67168	uspA	universal stress global stress response regulator
b0096	0.505181	11.0994	9.79842	1.43416e-06	1.0949e-05	4.53812	lpxC	UDP-3-O-acyl-N-acetylglucosamine deacetylase
b1067	0.707269	5.41176	9.78862	1.44778e-06	1.10336e-05	4.99415	yceH	DUF480 domain-containing protein YceH
b0314	-0.629976	6.98274	-9.78655	1.45067e-06	1.10363e-05	4.72099	betT	choline:H(+) symporter
b3997	0.522013	7.41176	9.78423	1.45393e-06	1.10417e-05	4.66769	hemE	uroporphyrinogen decarboxylase
b1939	-1.9296	1.88556	-9.77564	1.46603e-06	1.11142e-05	5.74525	fliG	flagellar motor switch protein FliG
b3617	0.454823	9.07801	9.77151	1.4719e-06	1.11392e-05	4.56015	kbl	2-amino-3-ketobutyrate CoA ligase
b0728	-0.485699	8.01072	-9.76809	1.47677e-06	1.11567e-05	4.60484	sucC	succinyl-CoA synthetase subunit beta
b4314	-0.817204	4.83565	-9.76061	1.48749e-06	1.12182e-05	5.09594	fimA	type 1 fimbriae major subunit
b3461	0.67068	10.5046	9.7486	1.50488e-06	1.13296e-05	4.49988	rpoH	RNA polymerase%2C sigma 32 (sigma H) factor
b0742	-0.446019	9.39869	-9.74264	1.51358e-06	1.13755e-05	4.52102	cpoB	cell division coordinator CpoB
b1944	-3.56819	0.786311	-9.72243	1.54354e-06	1.15735e-05	5.7559	fliL	flagellar protein FliL
b3468	0.787603	5.18541	9.72128	1.54527e-06	1.15735e-05	4.97417	yhhN	conserved inner membrane enzyme YhhN
b0391	0.684658	6.09354	9.71792	1.55031e-06	1.15878e-05	4.78415	ppnP	nucleoside phosphorylase PpnP
b1463	2.11905	1.56291	9.71646	1.55251e-06	1.15878e-05	5.72309	nhoA	arylamine N-acetyltransferase
b2672	1.87479	2.33942	9.7027	1.57341e-06	1.17237e-05	5.59464	ygaM	DUF883 domain-containing protein YgaM
b1941	-2.2169	1.58631	-9.67049	1.6235e-06	1.20762e-05	5.68164	fliI	flagellum-specific ATP synthase FliI
b0928	0.52543	7.68006	9.66024	1.63981e-06	1.21766e-05	4.51405	aspC	aspartate aminotransferase
b2833	1.2838	5.40659	9.65261	1.65207e-06	1.22467e-05	4.86915	ygdR	DUF903 domain-containing lipoprotein YgdR
b2749	1.12991	4.40567	9.64598	1.6628e-06	1.23053e-05	5.076	ygbE	conserved inner membrane protein YgbE
b0448	0.532438	6.72257	9.63846	1.67506e-06	1.23749e-05	4.59619	mdlA	ABC transporter family protein MdlA
b0217	-0.83753	5.65262	-9.6098	1.7227e-06	1.27053e-05	4.76436	yafT	lipoprotein YafT
b3653	0.753347	5.19897	9.59072	1.75523e-06	1.29233e-05	4.83314	gltS	glutamate:sodium symporter
b2478	0.452998	9.062	9.58308	1.76845e-06	1.29986e-05	4.36178	dapA	4-hydroxy-tetrahydrodipicolinate synthase
b3603	-0.639166	6.12873	-9.57758	1.77803e-06	1.30469e-05	4.63206	lldP	lactate/glycolate:H(+) symporter LldP
b4411	-0.710932	5.52427	-9.54903	1.82865e-06	1.33957e-05	4.72249	ecnB	bacteriolytic entericidin B lipoprotein
b3869	0.701655	6.32965	9.54678	1.8327e-06	1.34028e-05	4.562	glnL	sensory histidine kinase NtrB
b2049	3.27789	1.41847	9.52876	1.86556e-06	1.36202e-05	5.57286	cpsB	mannose-1-phosphate guanylyltransferase
b3220	-1.10106	4.43357	-9.52325	1.87573e-06	1.36714e-05	4.94515	yhcG	DUF1016 domain-containing protein YhcG
b4567	4.18045	1.24589	9.50103	1.91736e-06	1.39514e-05	5.55551	yjjZ	protein YjjZ
b3433	0.462394	7.98372	9.49559	1.92769e-06	1.40032e-05	4.31675	asd	aspartate-semialdehyde dehydrogenase
b4395	0.59872	6.66312	9.48416	1.94963e-06	1.41389e-05	4.44145	ytjC	putative phosphatase
b1863	-0.515176	7.59891	-9.45889	1.99908e-06	1.44653e-05	4.30786	ruvC	crossover junction endodeoxyribonuclease RuvC
b1798	-1.04613	4.34167	-9.45777	2.00129e-06	1.44653e-05	4.89568	leuE	leucine exporter
b0163	0.650667	5.6477	9.45378	2.00925e-06	1.44986e-05	4.5899	yaeH	DUF3461 domain-containing protein YaeH
b3800	-0.641129	6.19503	-9.45205	2.01269e-06	1.44994e-05	4.48628	aslB	putative anaerobic sulfatase maturation enzyme AslB
b1600	0.804913	6.27277	9.44028	2.03637e-06	1.46457e-05	4.45972	mdtJ	multidrug/spermidine efflux pump membrane subunit MdtJ
b1824	-0.7892	7.32183	-9.43709	2.04284e-06	1.46679e-05	4.31494	yobF	DUF2527 domain-containing protein YobF
b3655	0.661246	5.69062	9.42991	2.05749e-06	1.47487e-05	4.55574	yicH	AsmA famly protein YicH
b2420	0.989952	5.07739	9.41081	2.09697e-06	1.5007e-05	4.67305	yfeS	conserved protein YfeS
b4369	-0.700976	5.39471	-9.40643	2.10614e-06	1.50478e-05	4.59694	leuP	tRNA-Leu
b1116	0.46858	7.76342	9.39932	2.12115e-06	1.51301e-05	4.22845	lolC	lipoprotein release complex - inner membrane subunit
b0197	0.493366	7.32636	9.38174	2.15869e-06	1.53727e-05	4.24811	metQ	L-methionine/D-methionine ABC transporter membrane anchored binding protein
b0749	-0.782305	5.41751	-9.37373	2.17602e-06	1.54708e-05	4.55884	lysQ	tRNA-Lys
b3167	-0.47741	7.45482	-9.36874	2.18691e-06	1.55228e-05	4.22299	rbfA	30S ribosome binding factor
b1868	0.853533	5.02011	9.35635	2.21419e-06	1.56908e-05	4.62387	yecE	DUF72 domain-containing protein YecE
b3534	-0.990439	4.16345	-9.32614	2.28228e-06	1.61469e-05	4.79209	bcsQ	cellulose biosynthesis protein
b0683	0.433814	9.12842	9.29043	2.36571e-06	1.671e-05	4.04463	fur	DNA-binding transcriptional dual regulator Fur
b3753	-0.616558	7.01143	-9.28853	2.37024e-06	1.67148e-05	4.18596	rbsR	DNA-binding transcriptional dual regulator RbsR
b2048	2.36009	1.80216	9.27842	2.3945e-06	1.68585e-05	5.2603	cpsG	phosphomannomutase
b1632	-0.521324	6.62192	-9.26139	2.43597e-06	1.71227e-05	4.20811	rsxE	SoxR [2Fe-2S] reducing system protein RsxE
b0852	0.556553	6.33442	9.2479	2.46939e-06	1.73296e-05	4.23654	rimK	ribosomal protein S6 modification protein
b3408	1.23392	3.55079	9.24254	2.4828e-06	1.73956e-05	4.84016	feoA	ferrous iron transport protein A
b1068	0.65234	5.47368	9.21251	2.55945e-06	1.79038e-05	4.36525	yceM	putative oxidoreductase YceM
b0154	0.498548	8.31567	9.20788	2.57148e-06	1.7959e-05	3.98598	hemL	glutamate-1-semialdehyde aminotransferase
b3671	0.536242	6.60952	9.17355	2.66271e-06	1.85663e-05	4.1113	ilvB	acetohydroxy acid synthase I subunit IlvB
b3651	-0.511614	7.26423	-9.16819	2.6773e-06	1.86381e-05	4.02355	trmH	tRNA (Gm18) 2'-O-methyltransferase
b1269	-0.492986	8.26767	-9.16509	2.68574e-06	1.8667e-05	3.94235	rluB	23S rRNA pseudouridine(2605) synthase
b4370	-0.843627	4.81349	-9.15215	2.72137e-06	1.88844e-05	4.45154	leuQ	tRNA-Leu
b1922	-2.6868	0.916869	-9.11434	2.82846e-06	1.95962e-05	5.17266	fliA	RNA polymerase%2C sigma 28 (sigma F) factor
b0819	0.434299	8.69073	9.11247	2.83387e-06	1.96025e-05	3.86384	ldtB	L%2CD-transpeptidase YbiS
b3896	-1.37458	2.93953	-9.11048	2.83965e-06	1.96112e-05	4.84381	yiiG	DUF3829 domain-containing lipoprotein YiiG
b2098	1.15382	3.87816	9.09511	2.88467e-06	1.98905e-05	4.60477	yegT	putative transporter YegT
b4163	-0.498815	7.20381	-9.08501	2.91466e-06	2.00655e-05	3.93818	glyV	tRNA-Gly
b3799	-0.828098	7.33428	-9.08298	2.92074e-06	2.00755e-05	3.92755	proM	tRNA-Pro
b3149	0.519633	6.48256	9.06257	2.98254e-06	2.04678e-05	4.00804	diaA	DnaA initiator-associating factor for replication initiation
b1557	-0.694468	9.92864	-9.0352	3.06767e-06	2.10189e-05	3.74245	cspB	Qin prophage%3B cold shock-like protein CspB
b2291	0.721567	5.53817	9.01896	3.11943e-06	2.13398e-05	4.13946	yfbR	dCMP phosphohydrolase
b4406	0.716869	5.10991	9.00851	3.15323e-06	2.15372e-05	4.22041	yaeP	UPF0253 family protein YaeP
b3957	0.630503	5.56607	9.00067	3.17888e-06	2.16783e-05	4.11155	argE	acetylornithine deacetylase
b3616	0.422207	9.20924	8.9917	3.20847e-06	2.18457e-05	3.71235	tdh	threonine dehydrogenase
b2216	0.571643	8.42931	8.97742	3.25621e-06	2.21361e-05	3.72522	rcsD	RcsD phosphotransferase
b3688	0.664033	5.7542	8.97015	3.2808e-06	2.22413e-05	4.03936	yidQ	DUF1375 domain-containing putative lipoprotein YidQ
b4017	-1.3373	3.58502	-8.96982	3.28192e-06	2.22413e-05	4.54759	arpA	regulator of acetyl CoA synthetase
b1705	0.984926	4.24084	8.9673	3.29048e-06	2.22646e-05	4.3764	ydiE	PF10636 family protein YdiE
b1947	-3.43543	-0.080228	-8.91295	3.48148e-06	2.35203e-05	4.91994	fliO	flagellar biosynthesis protein FliO
b3618	-0.809626	6.25751	-8.90287	3.51823e-06	2.37317e-05	3.87686	htrL	protein HtrL
b2497	-0.484568	6.84319	-8.89698	3.53986e-06	2.38406e-05	3.77205	uraA	hypothetical protein
b4736	-0.774032	5.6806	-8.87374	3.62675e-06	2.43554e-05	3.95329	yliM	protein YliM
b1946	-3.12436	0.562123	-8.87354	3.62752e-06	2.43554e-05	4.93072	fliN	flagellar motor switch protein FliN
b1077	-2.18274	1.40544	-8.86177	3.67238e-06	2.46186e-05	4.86951	flgF	flagellar basal-body rod protein FlgF
b3497	0.596905	5.91201	8.85255	3.70797e-06	2.48188e-05	3.87458	rsmJ	16S rRNA m(2)G1516 methyltransferase
b2521	0.579045	5.97909	8.84885	3.72235e-06	2.48767e-05	3.85709	sseA	3-mercaptopyruvate sulfurtransferase
b3267	2.33211	2.54908	8.8458	3.73425e-06	2.49169e-05	4.67282	yhdV	lipoprotein YhdV
b0431	-0.398727	11.5377	-8.84437	3.73984e-06	2.49169e-05	3.48998	cyoB	cytochrome bo3 ubiquinol oxidase subunit 1
b1857	0.432567	7.81461	8.83968	3.75827e-06	2.50014e-05	3.60562	znuA	Zn(2(+)) ABC transporter periplasmic binding protein
b0064	0.905659	4.00031	8.835	3.77672e-06	2.50857e-05	4.28152	araC	DNA-binding transcriptional dual regulator AraC
b3847	0.440042	8.18176	8.81698	3.84879e-06	2.55137e-05	3.55653	pepQ	Xaa-Pro dipeptidase
b3173	-1.012	4.50725	-8.81515	3.85618e-06	2.55137e-05	4.15271	yhbX	putative hydrolase%2C inner membrane
b3181	0.420756	8.18264	8.81451	3.85876e-06	2.55137e-05	3.55359	greA	transcription elongation factor GreA
b2421	-0.701454	5.29248	-8.80348	3.90373e-06	2.57717e-05	3.95384	cysM	cysteine synthase B
b1608	0.552239	6.11754	8.77746	4.0121e-06	2.6447e-05	3.74995	rstA	DNA-binding transcriptional regulator RstA
b2211	0.458774	7.62291	8.76974	4.04487e-06	2.66226e-05	3.54105	yojI	ABC transporter family protein/microcin J25 efflux protein
b4515	0.583427	5.76424	8.75382	4.11332e-06	2.70322e-05	3.79158	cydX	cytochrome bd-I ubiquinol oxidase subunit CydX
b2764	0.940998	3.90304	8.74587	4.14802e-06	2.7219e-05	4.20458	cysJ	sulfite reductase%2C flavoprotein subunit
b4240	0.779249	4.58417	8.74438	4.15457e-06	2.72209e-05	4.04272	treB	trehalose-specific PTS enzyme IIBC component
b2296	0.396856	11.083	8.74201	4.16496e-06	2.72479e-05	3.38379	ackA	acetate kinase
b3399	0.470167	6.95833	8.72058	4.26045e-06	2.78307e-05	3.55445	yrfG	purine nucleotidase
b4571	-0.781742	4.92981	-8.71117	4.3031e-06	2.80671e-05	3.93136	wbbL	interrupted rhamnosyltransferase WbbL
b1284	-0.610553	5.49646	-8.70845	4.31553e-06	2.8106e-05	3.79952	yciT	putative DNA-binding transcriptional regulator YciT
b3831	0.443753	8.0867	8.70702	4.32209e-06	2.81065e-05	3.43659	udp	uridine phosphorylase
b2952	0.519795	6.77517	8.70238	4.34338e-06	2.82028e-05	3.55835	yggT	uncharacterized protein YggT
b1112	0.733687	4.78156	8.6909	4.3966e-06	2.85057e-05	3.93631	bhsA	DUF1471 domain-containing multiple stress resistance outer membrane protein BhsA
b2260	-0.555726	6.67915	-8.67503	4.47137e-06	2.89473e-05	3.54361	menE	o-succinylbenzoate--CoA ligase
b2366	0.83916	6.0273	8.66699	4.50976e-06	2.91524e-05	3.64613	dsdA	D-serine ammonia-lyase
b2927	0.414906	9.12469	8.66152	4.53608e-06	2.92789e-05	3.34016	epd	D-erythrose-4-phosphate dehydrogenase
b2467	0.900195	5.00326	8.65267	4.57901e-06	2.95122e-05	3.84622	nudK	GDP-mannose hydrolase
b3797	-0.768467	8.19584	-8.64636	4.60991e-06	2.96673e-05	3.36385	hisR	tRNA-His
b0167	0.493152	7.03037	8.62867	4.6977e-06	3.01876e-05	3.44011	glnD	PII uridylyltransferase/uridylyl removing enzyme
b3182	0.463299	6.92583	8.62353	4.72354e-06	3.03088e-05	3.44706	dacB	peptidoglycan DD-endopeptidase DacB
b1544	-0.828922	4.61406	-8.61248	4.77966e-06	3.06237e-05	3.89131	ydfK	Qin prophage%3B cold shock protein YdfK
b3661	-1.01979	4.01262	-8.60695	4.80802e-06	3.076e-05	4.02974	nlpA	lipoprotein-28
b0468	0.543033	6.00625	8.58192	4.93861e-06	3.1549e-05	3.54624	ybaN	conserved inner membrane protein YbaN
b2965	0.590999	6.5078	8.55035	5.10885e-06	3.25886e-05	3.42364	speC	ornithine decarboxylase%2C biosynthetic
b0189	0.626394	5.35565	8.54251	5.15206e-06	3.28161e-05	3.63593	rof	modulator of Rho-dependent transcription termination
b3357	0.408842	9.1195	8.53783	5.1781e-06	3.29231e-05	3.19713	crp	DNA-binding transcriptional dual regulator CRP
b2620	0.451735	7.58322	8.53677	5.18402e-06	3.29231e-05	3.27597	smpB	SsrA-binding protein
b2148	-1.06142	4.09986	-8.52155	5.2697e-06	3.34184e-05	3.91306	mglC	D-galactose/methyl-galactoside ABC transporter membrane subunit
b1641	0.433779	8.44217	8.49884	5.40038e-06	3.41971e-05	3.17688	slyB	outer membrane lipoprotein SlyB
b0026	0.435909	10.1315	8.49472	5.42451e-06	3.43e-05	3.12051	ileS	isoleucine--tRNA ligase
b3536	-0.486608	7.25175	-8.48097	5.5057e-06	3.47628e-05	3.2451	bcsE	c-di-GMP-binding protein BcsE
b2590	-0.722447	5.76384	-8.47838	5.52115e-06	3.48097e-05	3.48165	gltW	tRNA-Glu
b0576	-0.493742	6.9391	-8.46402	5.60769e-06	3.5304e-05	3.26212	pheP	phenylalanine:H(+) symporter PheP
b3962	-0.395194	8.59863	-8.44787	5.70673e-06	3.58756e-05	3.11077	sthA	soluble pyridine nucleotide transhydrogenase
b0207	-0.704112	4.77062	-8.44506	5.7242e-06	3.59334e-05	3.65795	dkgB	methylglyoxal reductase DkgB
b2701	0.596823	5.61883	8.44025	5.75417e-06	3.60694e-05	3.45965	mltB	membrane-bound lytic murein transglycosylase B
b3256	-0.379165	11.1722	-8.41692	5.90193e-06	3.69423e-05	3.00469	accC	biotin carboxylase
b1421	-0.752445	4.69738	-8.41271	5.92903e-06	3.70586e-05	3.63841	trg	methyl-accepting chemotaxis protein Trg
b2479	0.523241	6.23522	8.40584	5.97351e-06	3.7283e-05	3.29879	gcvR	putative transcriptional regulator GcvR
b3528	-0.564119	6.71466	-8.38551	6.10743e-06	3.8045e-05	3.20198	dctA	C4 dicarboxylate/orotate:H(+) symporter
b2345	-1.54882	2.2999	-8.38465	6.11312e-06	3.8045e-05	4.17594	yfdF	protein YfdF
b0837	2.04571	1.37918	8.3824	6.12816e-06	3.8084e-05	4.33907	yliI	aldose sugar dehydrogenase YliI
b0054	0.380071	9.95863	8.3742	6.18331e-06	3.83719e-05	2.98314	lptD	lipopolysaccharide assembly protein LptD
b0526	0.40464	8.20682	8.37017	6.21059e-06	3.84862e-05	3.03761	cysS	cysteine--tRNA ligase
b4410	-0.587051	5.98701	-8.3617	6.26837e-06	3.87805e-05	3.29683	ecnA	entericidin A lipoprotein%2C antidote to entericidin B
b2346	0.418658	7.61297	8.36059	6.27594e-06	3.87805e-05	3.06672	mlaA	intermembrane phospholipid transport system - outer membrane lipoprotein MlaA
b3233	0.430578	7.95065	8.35024	6.34747e-06	3.91668e-05	3.02947	yhcB	conserved protein YhcB
b0659	0.485827	6.66109	8.34375	6.3927e-06	3.93899e-05	3.15674	ybeY	endoribonuclease YbeY
b4239	0.833792	4.26508	8.33991	6.41968e-06	3.95001e-05	3.65001	treC	trehalose-6-phosphate hydrolase
b3041	-0.39157	8.56544	-8.33164	6.47814e-06	3.98035e-05	2.97509	ribB	3%2C4-dihydroxy-2-butanone-4-phosphate synthase
b4368	-0.602074	5.86366	-8.31683	6.58424e-06	4.03982e-05	3.26798	leuV	tRNA-Leu
b3969	-0.819091	6.60484	-8.3095	6.63752e-06	4.06677e-05	3.13434	gltT	tRNA-Glu
b0989	-0.653263	5.90959	-8.30707	6.65528e-06	4.07191e-05	3.24893	cspH	CspA family protein CspH
b2806	-0.473605	7.4251	-8.29185	6.76761e-06	4.12906e-05	3.00433	rlmM	23S rRNA 2'-O-ribose C2498 methyltransferase
b1789	-0.955869	3.77724	-8.29183	6.76771e-06	4.12906e-05	3.71453	yeaL	conserved inner membrane protein YeaL
b0966	0.455421	6.87036	8.28262	6.83673e-06	4.16532e-05	3.0547	hspQ	heat shock protein%2C hemimethylated DNA-binding protein
b0406	0.388384	9.34854	8.27978	6.85813e-06	4.17251e-05	2.8868	tgt	tRNA-guanine transglycosylase
b0828	0.733501	4.89199	8.27749	6.87545e-06	4.1772e-05	3.4304	iaaA	isoaspartyl dipeptidase proenzyme
b4486	-0.777518	4.31528	-8.25329	7.0615e-06	4.28424e-05	3.53937	yjiV	putative uncharacterized protein YjiV
b0156	0.434642	7.46334	8.25064	7.08219e-06	4.2908e-05	2.94956	erpA	iron-sulfur cluster insertion protein ErpA
b0268	1.16676	3.22758	8.24769	7.10535e-06	4.29883e-05	3.78981	yagE	CP4-6 prophage%3B putative 2-keto-3-deoxygluconate aldolase
b3161	-0.757945	4.94713	-8.24453	7.13019e-06	4.30366e-05	3.38289	mtr	tryptophan:H(+) symporter Mtr
b0754	-0.528889	7.39129	-8.24416	7.13315e-06	4.30366e-05	2.95142	aroG	3-deoxy-7-phosphoheptulonate synthase%2C Phe-sensitive
b2895	0.461033	6.965	8.24145	7.15451e-06	4.31056e-05	2.9935	fldB	flavodoxin 2
b3410	1.08951	4.02351	8.23898	7.17405e-06	4.31635e-05	3.59394	feoC	ferrous iron transport protein FeoC
b1073	-3.42313	0.107798	-8.23351	7.21759e-06	4.33654e-05	4.25161	flgB	flagellar basal-body rod protein FlgB
b1162	-0.477127	7.12248	-8.23063	7.24066e-06	4.3444e-05	2.96345	bluR	DNA-binding transcriptional repressor BluR
b2753	0.501817	6.21454	8.22793	7.26233e-06	4.35139e-05	3.09138	iap	alkaline phosphatase isozyme conversion protein
b2075	0.646739	5.14606	8.22283	7.30348e-06	4.37002e-05	3.3067	mdtB	multidrug efflux pump RND permease subunit MdtB
b2330	0.412467	7.70646	8.21993	7.32699e-06	4.37805e-05	2.8919	prmB	50S ribosomal subunit protein L3 N(5)-glutamine methyltransferase
b0747	-0.56183	8.66268	-8.21553	7.36278e-06	4.3934e-05	2.83349	lysY	tRNA-Lys
b0699	1.57417	2.88507	8.21187	7.3927e-06	4.4052e-05	3.84404	ybfA	DUF2517 domain-containing protein YbfA
b3873	-1.05291	4.08801	-8.20977	7.40991e-06	4.4094e-05	3.55061	yihM	putative TIM barrel domain-containing protein YihM
b4517	-0.680575	5.42719	-8.20759	7.42793e-06	4.41408e-05	3.23129	gnsA	putative phosphatidylethanolamine synthesis regulator GnsA
b0712	0.643441	5.73085	8.19858	7.50253e-06	4.45232e-05	3.15145	pxpC	5-oxoprolinase component C
b0310	-1.86957	1.37457	-8.19611	7.52312e-06	4.45845e-05	4.12996	ykgH	uncharacterized protein YkgH
b3622	-0.917517	5.88334	-8.186	7.6081e-06	4.49716e-05	3.11846	waaL	O-antigen ligase
b4144	0.511777	6.2294	8.18588	7.60914e-06	4.49716e-05	3.03855	yjeI	DUF4156 domain-containing lipoprotein YjeI
b0845	0.604705	5.56276	8.18168	7.64475e-06	4.51207e-05	3.16565	ybjJ	inner membrane protein YbjJ
b3964	0.432781	7.13724	8.16518	7.78633e-06	4.58537e-05	2.88113	yijD	conserved inner membrane protein YijD
b1197	-0.900737	4.23178	-8.16475	7.79007e-06	4.58537e-05	3.45757	treA	periplasmic trehalase
b1230	-0.466719	7.62183	-8.14904	7.92765e-06	4.66005e-05	2.81559	tyrV	tRNA-Tyr
b2531	0.38046	8.63193	8.14566	7.95765e-06	4.67136e-05	2.74944	iscR	DNA-binding transcriptional dual regulator IscR
b0166	0.378232	8.9242	8.13798	8.02611e-06	4.70518e-05	2.72948	dapD	tetrahydrodipicolinate succinylase
b1020	-0.793329	4.45261	-8.12818	8.11446e-06	4.75057e-05	3.35874	phoH	ATP-binding protein PhoH
b0743	-0.448194	9.22683	-8.12404	8.15203e-06	4.76614e-05	2.70377	lysT	tRNA-Lys
b1864	-0.415879	8.59754	-8.11128	8.2692e-06	4.82814e-05	2.71006	yebC	putative transcriptional regulator YebC
b4207	0.445027	7.86531	8.10467	8.33066e-06	4.8575e-05	2.74174	fklB	FKBP-type peptidyl-prolyl cis-trans isomerase FklB
b3895	-0.550212	5.89308	-8.10237	8.35216e-06	4.86351e-05	3.00484	fdhD	sulfurtransferase for molybdenum cofactor sulfuration
b3184	-0.380947	8.95786	-8.07543	8.60827e-06	5.00593e-05	2.65309	yhbE	inner membrane protein YhbE
b3207	0.451924	7.10119	8.06952	8.66566e-06	5.03257e-05	2.77001	yrbL	protein kinase-like domain-containing protein YrbL
b3556	-0.425132	14.2016	-8.06721	8.68812e-06	5.03888e-05	2.52565	cspA	cold shock protein CspA
b3557	-0.570946	5.84027	-8.05439	8.81433e-06	5.10526e-05	2.95738	insJ	insertion element IS150 protein InsA
b3898	1.2375	3.13523	8.05108	8.84723e-06	5.11749e-05	3.58072	frvX	peptidase M42 family protein
b1161	-1.07671	3.84514	-8.04268	8.9312e-06	5.15919e-05	3.40755	ycgX	uncharacterized protein YcgX
b4685	-0.446517	6.93418	-8.04003	8.95792e-06	5.16776e-05	2.75648	yrbN	uncharacterized protein YrbN
b0744	-0.489889	9.63456	-8.03062	9.0535e-06	5.21597e-05	2.57936	valT	tRNA-Val
b3387	-0.439754	7.66859	-8.02678	9.09269e-06	5.23161e-05	2.66326	dam	DNA adenine methyltransferase
b1742	1.74792	1.97292	8.00787	9.28893e-06	5.33745e-05	3.80443	ves	HutD family protein Ves
b4177	0.387458	10.1022	7.98754	9.50495e-06	5.45436e-05	2.51499	purA	adenylosuccinate synthetase
b4178	-0.617007	7.89448	-7.9757	9.63328e-06	5.52071e-05	2.5855	nsrR	DNA-binding transcriptional repressor NsrR
b4744	-0.619034	6.01583	-7.97091	9.68572e-06	5.54139e-05	2.82301	ynaM	Rac prophage%3B protein YnaM
b4346	-0.652144	5.74442	-7.97008	9.69488e-06	5.54139e-05	2.87672	mcrB	5-methylcytosine-specific restriction enzyme subunit McrB
b2862	-1.1029	3.08408	-7.95549	9.85668e-06	5.62647e-05	3.47931	ygeP	protein YgeP
b0479	-0.756567	4.30097	-7.93229	1.01201e-05	5.76927e-05	3.15615	fsr	fosmidomycin efflux pump
b1159	-1.27355	4.0112	-7.92706	1.01805e-05	5.79608e-05	3.23773	mcrA	e14 prophage%3B 5-methylcytosine-specific restriction enzyme McrA
b2423	1.64155	2.1188	7.88003	1.07418e-05	6.10761e-05	3.61851	cysW	sulfate/thiosulfate ABC transporter inner membrane subunit CysW
b1274	-0.371842	10.2496	-7.87382	1.08182e-05	6.14307e-05	2.37168	topA	DNA topoisomerase 1
b3388	-0.411052	9.50314	-7.84691	1.1157e-05	6.32717e-05	2.35712	damX	cell division protein DamX
b1375	-0.697224	5.72593	-7.83729	1.12809e-05	6.38906e-05	2.71854	ynaE	Rac prophage%3B uncharacterized protein YnaE
b2045	1.49751	1.91208	7.82387	1.1456e-05	6.47983e-05	3.58417	wcaK	putative colanic acid biosynthesis pyruvyl transferase
b4735	-0.702755	4.55708	-7.80727	1.1677e-05	6.57755e-05	2.94119	ybgU	protein YbgU
b3183	-0.402289	9.34663	-7.8051	1.17062e-05	6.57755e-05	2.30949	obgE	GTPase ObgE
b0417	-0.459909	7.06995	-7.80422	1.17181e-05	6.57755e-05	2.44996	thiL	thiamine monophosphate kinase
b3609	-0.423702	8.25574	-7.80397	1.17214e-05	6.57755e-05	2.3498	secB	SecB chaperone
b0120	-0.416563	7.80478	-7.80363	1.17261e-05	6.57755e-05	2.37793	speD	S-adenosylmethionine decarboxylase proenzyme
b1074	-3.20304	0.0791357	-7.80357	1.17268e-05	6.57755e-05	3.78812	flgC	flagellar basal-body rod protein FlgC
b1057	1.02731	3.18373	7.80298	1.17348e-05	6.57755e-05	3.26161	yceJ	putative cytochrome b561
b3091	0.821654	4.38829	7.80181	1.17506e-05	6.5779e-05	2.97248	uxaA	D-altronate dehydratase
b0315	-0.696363	4.92352	-7.7978	1.1805e-05	6.59989e-05	2.84512	pdeL	DNA-binding transcriptional activator/c-di-GMP phosphodiesterase PdeL
b2942	-0.42655	8.42922	-7.78368	1.19988e-05	6.69959e-05	2.31567	metK	methionine adenosyltransferase
b0447	0.58098	5.46429	7.7641	1.22733e-05	6.84404e-05	2.67667	decR	DNA-binding transcriptional activator DecR
b3662	-0.467423	6.67252	-7.75979	1.23346e-05	6.86944e-05	2.44797	nepI	purine ribonucleoside exporter
b4536	0.752001	5.19022	7.75475	1.24067e-05	6.90074e-05	2.7286	yobH	protein YobH
b2290	-0.415585	7.69913	-7.75066	1.24655e-05	6.92459e-05	2.32011	alaA	glutamate--pyruvate aminotransferase AlaA
b0180	-0.403255	8.78604	-7.73822	1.26464e-05	7.0161e-05	2.24389	fabZ	3-hydroxy-acyl-[acyl-carrier-protein] dehydratase
b1764	0.387687	7.81683	7.73546	1.2687e-05	7.02838e-05	2.29078	selD	selenide%2C water dikinase
b0025	0.382923	8.02041	7.73451	1.27009e-05	7.02838e-05	2.27586	ribF	bifunctional riboflavin kinase/FMN adenylyltransferase
b4443	0.537559	10.1822	7.72185	1.28889e-05	7.12168e-05	2.18424	gcvB	small regulatory RNA GcvB
b0710	0.591535	5.36465	7.72095	1.29023e-05	7.12168e-05	2.64479	ybgI	radiation resistance protein YbgI
b2845	-0.467759	6.61483	-7.7161	1.29752e-05	7.15281e-05	2.40204	yqeG	putative transporter YqeG
b2425	1.18852	3.00815	7.71385	1.30091e-05	7.16244e-05	3.19743	cysP	thiosulfate/sulfate ABC transporter periplasmic binding protein CysP
b3509	-1.78689	1.44579	-7.70902	1.30823e-05	7.18701e-05	3.54735	hdeB	periplasmic acid stress chaperone
b3175	-0.362494	11.0466	-7.70851	1.309e-05	7.18701e-05	2.14696	secG	Sec translocon subunit SecG
b2010	0.736858	4.63056	7.70764	1.31034e-05	7.18701e-05	2.79728	dacD	D-alanyl-D-alanine carboxypeptidase DacD
b4214	0.623713	5.03092	7.7059	1.31299e-05	7.19246e-05	2.7012	cysQ	3'(2')%2C5'-bisphosphate nucleotidase
b1871	-0.445055	6.90515	-7.69027	1.33708e-05	7.31519e-05	2.32808	cmoB	tRNA U34 carboxymethyltransferase
b2805	0.718871	4.31727	7.68203	1.34996e-05	7.37109e-05	2.83783	fucR	DNA-binding transcriptional activator FucR
b2997	-0.896913	3.50521	-7.68157	1.35069e-05	7.37109e-05	3.03774	hybO	hydrogenase 2 small subunit
b2762	1.27167	2.64073	7.67351	1.36343e-05	7.43132e-05	3.23537	cysH	phosphoadenosine phosphosulfate reductase
b0553	-1.21333	2.69298	-7.66633	1.3749e-05	7.48444e-05	3.21963	nmpC	DLP12 prophage%3B putative outer membrane porin NmpC
b2056	3.02298	1.1894	7.66308	1.38013e-05	7.50349e-05	3.56601	wcaD	putative colanic acid polymerase
b2114	0.371196	9.53128	7.65955	1.38582e-05	7.52501e-05	2.12221	metG	methionine--tRNA ligase
b2926	0.521942	9.85353	7.64876	1.40341e-05	7.61101e-05	2.10046	pgk	phosphoglycerate kinase
b3337	1.08627	2.98061	7.64493	1.4097e-05	7.63557e-05	3.11545	bfd	bacterioferritin-associated ferredoxin
b3284	0.423085	6.78664	7.63665	1.42342e-05	7.70029e-05	2.27455	smg	DUF494 domain-containing protein Smg
b0552	-1.38186	3.73983	-7.61286	1.46364e-05	7.90804e-05	2.91832	insH-2	DLP12 prophage%3B IS5 transposase and trans-activator
b3162	-0.497177	11.3761	-7.60775	1.47245e-05	7.94573e-05	2.01241	deaD	ATP-dependent RNA helicase DeaD
b4493	-0.407275	7.01824	-7.59123	1.50129e-05	8.09133e-05	2.18839	gapC	glyceraldehyde-3-phosphate dehydrogenase
b2039	-0.546438	7.70038	-7.58456	1.51311e-05	8.14489e-05	2.11227	rfbA	dTDP-glucose pyrophosphorylase
b1948	-2.37589	0.869428	-7.58028	1.52073e-05	8.17583e-05	3.48844	fliP	flagellar biosynthesis protein FliP
b3068	0.704106	4.37982	7.5638	1.55054e-05	8.32575e-05	2.67436	mug	stationary phase mismatch/uracil DNA glycosylase
b1525	-0.636608	4.75753	-7.55816	1.56088e-05	8.37092e-05	2.5815	sad	NAD(+)-dependent succinate semialdehyde dehydrogenase
b4391	0.402482	9.86967	7.54356	1.58799e-05	8.50581e-05	1.96671	ettA	energy-dependent translational throttle protein EttA
b0311	-0.507227	5.95189	-7.54244	1.59009e-05	8.5066e-05	2.29845	betA	choline dehydrogenase
b1066	0.646721	5.23434	7.53143	1.61089e-05	8.60727e-05	2.43572	rimJ	ribosomal-protein-S5-alanine N-acetyltransferase
b3261	-0.370785	9.59225	-7.52744	1.61851e-05	8.63737e-05	1.95328	fis	DNA-binding transcriptional dual regulator Fis
b1078	-1.96868	1.7142	-7.52598	1.6213e-05	8.64164e-05	3.29107	flgG	flagellar basal-body rod protein FlgG
b3362	0.857056	3.8127	7.51654	1.63951e-05	8.72798e-05	2.75221	yhfG	DUF2559 domain-containing protein YhfG
b2954	0.499999	6.77521	7.49725	1.67741e-05	8.91882e-05	2.10003	rdgB	dITP/XTP pyrophosphatase
b1940	-1.959	1.21695	-7.49372	1.68445e-05	8.94531e-05	3.32654	fliH	flagellar biosynthesis protein FliH
b3003	1.82725	1.49403	7.48041	1.71127e-05	9.07662e-05	3.25637	yghA	NADP(+)-dependent aldehyde reductase
b4235	0.460639	7.41183	7.47714	1.71793e-05	9.10082e-05	1.99823	pmbA	metalloprotease PmbA
b0847	-0.458372	6.68494	-7.46887	1.7349e-05	9.17956e-05	2.07821	ybjL	putative transport protein YbjL
b0493	0.468096	6.12946	7.4472	1.78023e-05	9.40795e-05	2.13989	ybbO	NADP(+)-dependent aldehyde reductase
b3872	-0.863637	3.80191	-7.44489	1.78513e-05	9.42238e-05	2.66896	yihL	putative transcriptional regulator YihL
b0899	-0.788679	3.98821	-7.4356	1.80501e-05	9.51571e-05	2.61078	ycaM	putative transporter YcaM
b0893	0.374557	10.056	7.42107	1.83659e-05	9.67051e-05	1.80523	serS	serine--tRNA ligase
b2901	0.438732	7.23701	7.41736	1.84474e-05	9.70163e-05	1.93942	bglA	6-phospho-beta-glucosidase A
b2146	-1.32079	2.15686	-7.41351	1.85324e-05	9.72646e-05	3.03008	preT	NAD-dependent dihydropyrimidine dehydrogenase subunit PreT
b1870	-0.496981	6.50011	-7.4132	1.85394e-05	9.72646e-05	2.03584	cmoA	carboxy-S-adenosyl-L-methionine synthase
b2323	-0.672291	8.79677	-7.4113	1.85814e-05	9.73676e-05	1.82964	fabB	beta-ketoacyl-[acyl carrier protein] synthase I
b2294	0.573525	5.78356	7.4016	1.87983e-05	9.83852e-05	2.14984	yfbU	UPF0304 family protein YfbU
b1305	1.28938	2.12753	7.40044	1.88244e-05	9.84036e-05	3.01073	pspB	phage shock protein B
b1459	-1.47544	1.92001	-7.39384	1.89738e-05	9.90649e-05	3.0623	yncI	putative transposase YncI
b4342	-0.733894	4.10183	-7.38883	1.9088e-05	9.95419e-05	2.52241	yjiT	putative uncharacterized protein YjiT
b2912	-0.535325	7.95596	-7.38226	1.92389e-05	0.000100208	1.83419	fau	putative 5-formyltetrahydrofolate cyclo-ligase
b1124	-0.436034	6.59654	-7.3786	1.93234e-05	0.000100528	1.97514	potC	spermidine preferential ABC transporter membrane subunit PotC
b0461	0.472535	7.31444	7.36929	1.95406e-05	0.000101536	1.86954	tomB	protein that modulates Hha toxicity
b4382	0.442771	6.95866	7.33601	2.03382e-05	0.000105554	1.86725	deoA	thymidine phosphorylase
b1125	-0.457141	6.76436	-7.32408	2.06327e-05	0.000106955	1.88005	potB	spermidine preferential ABC transporter membrane subunit PotB
b2134	0.434458	6.59873	7.30118	2.12108e-05	0.000109821	1.87219	pbpG	peptidoglycan DD-endopeptidase PbpG
b2365	0.947426	3.61948	7.30013	2.12377e-05	0.000109829	2.52371	dsdX	D-serine transporter
b2167	0.397001	10.3712	7.29596	2.13451e-05	0.000110253	1.63554	fruA	fructose-specific PTS multiphosphoryl transfer protein FruA
b1481	3.01248	-0.651308	7.29279	2.1427e-05	0.000110545	3.19322	bdm	biofilm-dependent modulation protein
b1122	-0.824778	4.1648	-7.28038	2.17511e-05	0.000112084	2.37077	ymfA	putative inner membrane protein
b3545	1.23501	2.44679	7.27524	2.1887e-05	0.000112591	2.77798	proK	tRNA-Pro
b4324	0.517531	6.07989	7.2747	2.19014e-05	0.000112591	1.92666	uxuR	DNA-binding transcriptional repressor UxuR
b0003	0.428963	6.67397	7.26799	2.20802e-05	0.000113376	1.81768	thrB	homoserine kinase
b0401	-0.36535	7.6509	-7.25145	2.25276e-05	0.000115534	1.68561	brnQ	branched chain amino acid transporter BrnQ
b0587	1.75998	1.46038	7.24993	2.25691e-05	0.000115534	2.97234	fepE	polysaccharide co-polymerase family protein FepE
b1049	0.362962	9.76576	7.24953	2.25803e-05	0.000115534	1.58976	opgH	osmoregulated periplasmic glucans (OPGs) biosynthesis protein H
b0829	0.538536	5.31875	7.24331	2.27514e-05	0.000116273	2.04413	gsiA	glutathione ABC transporter ATP binding subunit GsiA
b3933	0.405131	7.74186	7.24173	2.2795e-05	0.000116351	1.66467	ftsN	cell division protein FtsN
b0386	-0.503001	5.68541	-7.24082	2.28203e-05	0.000116351	1.96372	proC	pyrroline-5-carboxylate reductase
b3012	0.701113	4.20122	7.2382	2.28932e-05	0.000116586	2.29897	dkgA	methylglyoxal reductase DkgA
b2512	0.337857	9.43298	7.23601	2.29541e-05	0.000116759	1.58066	bamB	outer membrane protein assembly factor BamB
b3081	1.24531	2.36353	7.2319	2.3069e-05	0.000117207	2.74314	fadH	2%2C4-dienoyl-CoA reductase
b2682	0.395749	7.0339	7.23063	2.31049e-05	0.000117252	1.72005	ygaZ	L-valine exporter subunit YgaZ
b4315	-1.58943	1.63666	-7.20427	2.38587e-05	0.000120936	2.88433	fimI	putative fimbrial protein FimI
b2742	0.718888	7.46917	7.1925	2.42038e-05	0.00012236	1.62619	nlpD	murein hydrolase activator NlpD
b1377	1.38417	2.09663	7.19197	2.42195e-05	0.00012236	2.75576	ompN	outer membrane porin N
b0578	0.413244	7.99971	7.19181	2.42241e-05	0.00012236	1.58119	nfsB	NAD(P)H nitroreductase NfsB
b2046	1.96403	1.11337	7.19013	2.4274e-05	0.000122459	2.96327	wzxC	M-antigen undecaprenyl disphosphate flippase
b0834	-0.945026	3.56088	-7.18925	2.43e-05	0.000122459	2.39922	dgcI	putative diguanylate cyclase DgcI
b2133	0.402612	6.67834	7.1791	2.46034e-05	0.000123844	1.70031	dld	D-lactate dehydrogenase
b2047	2.06598	0.949973	7.1614	2.51421e-05	0.000126409	2.95141	wcaJ	undecaprenyl-phosphate glucose phosphotransferase
b3087	0.537127	5.3593	7.15867	2.52261e-05	0.000126684	1.92429	ygjR	putative oxidoreductase YgjR
b1784	1.35574	2.16875	7.14866	2.55377e-05	0.000128101	2.68305	yeaH	DUF444 domain-containing protein YeaH
b1117	0.377921	7.06183	7.13616	2.59323e-05	0.000129931	1.59225	lolD	lipoprotein release complex - ATP binding subunit
b0146	0.810313	5.60169	7.12361	2.6335e-05	0.000131677	1.83042	sfsA	putative DNA-binding transcriptional regulator of maltose metabolism
b4345	-0.903608	4.30928	-7.12342	2.63414e-05	0.000131677	2.1342	mcrC	5-methylcytosine-specific restriction enzyme subunit McrC
b2498	0.458867	8.11342	7.12228	2.63781e-05	0.000131709	1.48261	upp	uracil phosphoribosyltransferase
b2832	-0.466215	6.22879	-7.11055	2.67615e-05	0.000133469	1.68586	ygdQ	UPF0053 inner membrane protein YgdQ
b0887	0.62014	6.26108	7.09774	2.7187e-05	0.000135436	1.66283	cydD	glutathione/L-cysteine ABC exporter subunit CydD
b2042	0.348287	9.012	7.08615	2.75784e-05	0.000137229	1.39508	galF	UTP:glucose-1-phosphate uridylyltransferase%2C low activity
b3168	-0.347924	11.833	-7.0809	2.77576e-05	0.000137962	1.31855	infB	translation initiation factor IF-2
b2814	-0.361353	7.68046	-7.07005	2.81322e-05	0.000139664	1.44395	metZ	tRNA-Met
b0590	0.715071	5.74714	7.06863	2.81814e-05	0.000139749	1.72513	fepD	ferric enterobactin ABC transporter membrane subunit FebD
b3608	-0.354288	8.29036	-7.05065	2.88152e-05	0.000142729	1.37795	gpsA	glycerol-3-phosphate dehydrogenase
b0719	-2.68199	-0.412214	-7.04435	2.90409e-05	0.000143683	2.9121	ybgD	putative fimbrial protein YbgD
b0390	-0.567893	5.47415	-7.03947	2.92168e-05	0.000144389	1.74494	aroM	protein AroM
b4179	-0.369819	9.1785	-7.03486	2.93844e-05	0.000145052	1.32201	rnr	RNase R
b2038	-0.644055	6.46313	-7.02267	2.98319e-05	0.000147094	1.53282	rfbC	dTDP-4-dehydrorhamnose 3%2C5-epimerase
b4537	-0.439162	6.61379	-7.01948	2.99503e-05	0.00014751	1.50084	yecJ	DUF2766 domain-containing protein YecJ
b1749	0.375353	7.02702	7.01752	3.00233e-05	0.000147576	1.43886	xthA	exodeoxyribonuclease III
b2623	-1.19479	2.54998	-7.0173	3.00315e-05	0.000147576	2.42471	yfjH	CP4-57 prophage%3B protein YfjH
b0188	0.399314	6.51438	7.01515	3.0112e-05	0.000147804	1.50793	tilS	tRNA(Ile)-lysidine synthetase
b1630	-0.399796	7.03798	-7.00849	3.0362e-05	0.000148863	1.42735	rsxD	SoxR [2Fe-2S] reducing system protein RsxD
b3827	-0.461566	6.06321	-7.00123	3.06374e-05	0.000150044	1.57071	bioP	biotin transporter
b2415	0.375574	10.2417	6.99701	3.07986e-05	0.000150664	1.2437	ptsH	phosphocarrier protein HPr
b0766	0.459314	5.81301	6.99596	3.0839e-05	0.000150691	1.61	ybhA	pyridoxal phosphate/fructose-1%2C6-bisphosphate phosphatase
b0112	-0.420873	6.24022	-6.98364	3.13156e-05	0.000152848	1.51402	aroP	aromatic amino acid:H(+) symporter AroP
b1587	1.43828	2.04021	6.98094	3.14211e-05	0.000153191	2.49711	ynfE	putative selenate reductase YnfE
b2063	-0.495644	6.22032	-6.97775	3.15463e-05	0.000153629	1.51084	yegH	inner membrane protein YegH
b1178	1.78104	1.48848	6.9585	3.23132e-05	0.000157188	2.59523	pliG	inhibitor of g-type lysozyme
b4641	-1.44054	1.623	-6.95502	3.24543e-05	0.000157697	2.55915
b2820	0.372059	7.76219	6.95265	3.25507e-05	0.000157827	1.27946	recB	exodeoxyribonuclease V subunit RecB
b2582	0.435212	6.06105	6.95257	3.25536e-05	0.000157827	1.50276	trxC	reduced thioredoxin 2
b3485	1.0195	2.90237	6.95023	3.26493e-05	0.000157973	2.23986	yhhJ	ABC transporter family protein YhhJ
b0056	-0.560392	5.74255	-6.95005	3.26564e-05	0.000157973	1.56806	yabP	putative uncharacterized protein YabP
b3796	-0.563987	7.74057	-6.94281	3.29535e-05	0.000159233	1.27069	argX	tRNA-Arg
b2989	0.625743	4.59024	6.93294	3.33631e-05	0.000161033	1.8022	yghU	disulfide reductase/organic hydroperoxide reductase
b3750	-0.426563	8.65973	-6.93193	3.34054e-05	0.000161058	1.20206	rbsC	ribose ABC transporter membrane subunit
b3570	0.377794	7.36696	6.92236	3.38083e-05	0.00016282	1.27314	bax	putative glycoside hydrolase Bax
b3255	-0.326832	10.0032	-6.91942	3.39331e-05	0.00016324	1.14524	accB	biotin carboxyl carrier protein
b4606	1.79824	1.50494	6.90794	3.44251e-05	0.000165423	2.52781	ypfM	uncharacterized protein YpfM
b1306	1.11004	2.62938	6.90533	3.45381e-05	0.000165783	2.24922	pspC	phage shock protein C
b0004	0.359534	7.37567	6.89861	3.48308e-05	0.000167003	1.24014	thrC	threonine synthase
b0746	-0.499858	8.32415	-6.89476	3.49998e-05	0.000167628	1.16773	valZ	tRNA-Val
b4165	-0.587989	6.99114	-6.88348	3.54997e-05	0.000169836	1.26751	glyY	tRNA-Gly
b2822	0.343691	7.59775	6.87261	3.59889e-05	0.000171986	1.18442	recC	exodeoxyribonuclease V subunit RecC
b0388	-0.406015	6.35043	-6.86899	3.61534e-05	0.000172583	1.34024	aroL	shikimate kinase 2
b3201	0.383604	7.76359	6.86474	3.63479e-05	0.000173321	1.1607	lptB	lipopolysaccharide transport system ATP binding protein
b1636	-0.444111	6.40296	-6.84868	3.70915e-05	0.000176486	1.30452	pdxY	pyridoxal kinase 2
b4456	0.659867	5.87926	6.84865	3.70929e-05	0.000176486	1.40198	glmZ	small regulatory RNA GlmZ
b0729	-0.435401	7.49542	-6.83793	3.75987e-05	0.000178697	1.14851	sucD	succinyl-CoA synthetase subunit alpha
b0030	0.537163	5.12912	6.83598	3.76914e-05	0.000178941	1.54516	rihC	ribonucleoside hydrolase RihC
b4197	0.989559	2.78596	6.82931	3.8011e-05	0.000180262	2.10542	ulaE	L-ribulose-5-phosphate 3-epimerase UlaE
b4457	0.479289	6.0665	6.81815	3.85516e-05	0.000182626	1.32066	csrC	small regulatory RNA CsrC
b0581	0.764949	3.87884	6.79937	3.94801e-05	0.000186821	1.79546	ybdK	carboxylate-amine ligase
b1937	-3.20646	-0.911121	-6.79163	3.98701e-05	0.000188461	2.59335	fliE	flagellar basal-body protein FliE
b2074	0.734055	4.43633	6.77906	4.05119e-05	0.000191287	1.63237	mdtA	multidrug efflux pump membrane fusion protein MdtA
b3163	-0.319407	10.6074	-6.77739	4.0598e-05	0.000191485	0.937658	nlpI	lipoprotein NlpI
b1631	-0.475164	6.42251	-6.75481	4.17815e-05	0.000196853	1.17384	rsxG	SoxR [2Fe-2S] reducing system protein RsxG
b2914	0.378713	7.58539	6.73886	4.26398e-05	0.000200679	1.00328	rpiA	ribose-5-phosphate isomerase A
b3909	0.56219	4.87079	6.72916	4.31712e-05	0.000202961	1.45943	kdgT	2-dehydro-3-deoxy-D-gluconate:H(+) symporter
b0624	-1.18465	3.32519	-6.72819	4.32247e-05	0.000202993	1.85165	crcB	F(-) channel
b4353	-1.20526	2.7443	-6.71666	4.38666e-05	0.000205785	1.97918	yjiX	conserved protein YjiX
b3281	-0.474974	6.8641	-6.69543	4.50757e-05	0.000211228	1.02606	aroE	shikimate dehydrogenase
b3216	-0.714097	4.06018	-6.68432	4.57222e-05	0.000214027	1.59713	yhcD	putative fimbrial usher protein YhcD
b0033	0.466515	6.34815	6.67832	4.60757e-05	0.000215236	1.07881	carB	carbamoyl phosphate synthetase subunit beta
b3180	-0.328843	8.16239	-6.67826	4.60794e-05	0.000215236	0.879833	yhbY	ribosome assembly factor YhbY
b1121	-0.884698	3.08948	-6.67476	4.62866e-05	0.000215931	1.8248	ycfZ	putative inner membrane protein
b1558	-0.371486	7.29633	-6.67407	4.63277e-05	0.000215931	0.943144	cspF	Qin prophage%3B cold shock protein CspF
b0803	1.2202	1.93994	6.66771	4.67078e-05	0.000217469	2.0952	ybiI	zinc finger domain-containing protein YbiI
b3200	0.346585	7.77046	6.66586	4.68192e-05	0.000217754	0.887878	lptA	lipopolysaccharide transport system protein LptA
b4575	-0.421611	6.30288	-6.66181	4.70633e-05	0.000218656	1.06535	yjgX	KpLE2 phage-like element%3B putative phosphoethanolamine transferase YjgX%2C N-terminal fragment
b3865	0.377438	7.63383	6.65698	4.7357e-05	0.000219785	0.88642	yihA	GTP-binding protein YihA
b0790	1.42761	1.52938	6.65157	4.76876e-05	0.000221083	2.1694	ybhP	endonuclease/exonuclease/phosphatase domain-containing protein YbhP
b2807	-0.530635	5.51242	-6.64016	4.83933e-05	0.000223981	1.19409	ygdD	conserved inner membrane protein YgdD
b4260	0.401228	8.70204	6.63981	4.84157e-05	0.000223981	0.800564	pepA	aminopeptidase A/I
b1380	0.712724	5.08617	6.62985	4.90409e-05	0.000226631	1.27575	ldhA	D-lactate dehydrogenase
b4663	-0.924831	3.51796	-6.6272	4.92094e-05	0.000227169	1.65597	azuC	uncharacterized protein AzuC
b0761	0.47539	5.52315	6.6254	4.93237e-05	0.000227455	1.16718	modE	DNA-binding transcriptional dual regulator ModE
b0745	-0.41143	9.43755	-6.61757	4.98247e-05	0.000229521	0.746743	lysW	tRNA-Lys
b2562	-0.588944	4.55487	-6.59614	5.12248e-05	0.000235721	1.35402	yfhL	putative 4Fe-4S cluster-containing protein YfhL
b1213	-0.546494	5.27952	-6.58988	5.16415e-05	0.000237387	1.17633	ychQ	SirB family protein YchQ
b3752	-0.40268	8.85884	-6.58714	5.18249e-05	0.000237978	0.722198	rbsK	ribokinase
b3390	-0.311182	9.39025	-6.58166	5.21945e-05	0.000239422	0.698003	aroK	shikimate kinase 1
b1206	-0.388074	6.80457	-6.57617	5.25671e-05	0.000240877	0.867739	dauA	aerobic C4-dicarboxylate transporter DauA
b1983	-0.4392	7.31034	-6.57447	5.26829e-05	0.000241153	0.804302	yeeN	putative transcriptional regulator YeeN
b1989	-1.0234	2.84423	-6.57231	5.28312e-05	0.000241578	1.75025	asnV	tRNA-Asn
b4034	1.0176	4.12568	6.57009	5.29833e-05	0.000242019	1.42725	malE	maltose ABC transporter periplasmic binding protein
b0776	-0.589084	5.03916	-6.55909	5.37451e-05	0.00024524	1.18905	bioF	8-amino-7-oxononanoate synthase
b1950	-1.9844	0.438144	-6.55111	5.43056e-05	0.000247538	2.23545	fliR	flagellar biosynthesis protein FliR
b1126	-0.313687	8.36264	-6.53782	5.52526e-05	0.00025159	0.673953	potA	spermidine preferential ABC transporter ATP binding subunit
b4470	-0.427527	6.3555	-6.53581	5.53976e-05	0.000251986	0.881299	cyuA	putative L-cysteine desulfidase CyuA
b2269	-1.28166	2.03914	-6.5336	5.55574e-05	0.000252449	1.9009	elaD	protease ElaD
b4573	-0.73857	4.02361	-6.53277	5.56171e-05	0.000252456	1.39785	insZ	putative transposase InsZ
b4018	0.350564	7.10939	6.52884	5.59025e-05	0.000253487	0.760614	iclR	DNA-binding transcriptional repressor IclR
b0082	0.340869	8.25401	6.52603	5.61074e-05	0.000254151	0.662591	rsmH	16S rRNA m(4)C1402 methyltransferase
b2149	-0.81289	4.87906	-6.51264	5.70961e-05	0.00025836	1.16795	mglA	D-galactose/methyl-galactoside ABC transporter ATP binding subunit
b0460	0.505472	7.72767	6.50663	5.75456e-05	0.000260123	0.670375	hha	hemolysin expression modulating protein
b3279	0.491636	5.39985	6.50504	5.76653e-05	0.000260393	1.0273	yrdA	protein YrdA
b1602	0.433454	7.20441	6.50276	5.78372e-05	0.000260898	0.713684	pntB	pyridine nucleotide transhydrogenase subunit beta
b4519	-1.22692	1.88997	-6.50176	5.79129e-05	0.000260968	1.88828	icdC	protein IcdC
b0789	1.44556	1.83073	6.48644	5.90849e-05	0.000265974	1.88381	clsB	cardiolipin synthase B
b1297	-0.696619	5.40084	-6.4746	6.00078e-05	0.000269849	0.991434	puuA	glutamate-putrescine ligase
b3170	-0.301263	9.43904	-6.46951	6.04087e-05	0.000271371	0.539671	rimP	ribosome maturation factor RimP
b1114	0.323474	7.64783	6.45926	6.12266e-05	0.000274761	0.609082	mfd	transcription-repair coupling factor
b3156	0.48128	5.8046	6.45372	6.16736e-05	0.000276481	0.868138	yhbS	putative acyltransferase with acyl-CoA N-acyltransferase domain
b3029	0.385604	6.4423	6.44416	6.24522e-05	0.000279683	0.735753	ygiN	putative quinol monooxygenase YgiN
b1663	-0.461648	6.10309	-6.4394	6.28442e-05	0.000281148	0.791693	mdtK	multidrug efflux pump MdtK
b4703	-0.870181	3.29127	-6.43856	6.29134e-05	0.000281169	1.4487	pmrR	putative bitopic inner membrane protein
b2306	-0.650317	4.02463	-6.42712	6.38679e-05	0.000285141	1.24735	hisP	lysine/arginine/ornithine ABC transporter/histidine ABC transporter%2C ATP binding subunit
b3816	0.317623	8.41696	6.41933	6.45261e-05	0.000287784	0.504156	corA	Ni(2(+))/Co(2(+))/Mg(2(+)) transporter
b0133	0.349529	7.96473	6.40943	6.53735e-05	0.000291264	0.515758	panC	pantothenate synthetase
b0629	-0.972683	2.85667	-6.40541	6.57204e-05	0.00029251	1.51366	ybeF	putative LysR-type DNA-binding transcriptional regulator YbeF
b1374	-0.732561	3.56505	-6.39969	6.6218e-05	0.000294423	1.32324	pinR	Rac prophage%3B putative site-specific recombinase
b0791	0.636469	4.943	6.39747	6.64124e-05	0.000294953	0.982966	ybhQ	putative inner membrane protein
b3189	0.307986	9.23248	6.39678	6.64731e-05	0.000294953	0.442555	murA	UDP-N-acetylglucosamine 1-carboxyvinyltransferase
b1064	0.571651	4.72364	6.39393	6.67234e-05	0.000295762	1.02772	grxB	reduced glutaredoxin 2
b1723	0.531985	4.93486	6.38985	6.70843e-05	0.000297058	0.97205	pfkB	6-phosphofructokinase II
b2892	0.316655	8.13787	6.38425	6.75826e-05	0.00029896	0.469311	recJ	ssDNA-specific exonuclease RecJ
b3250	0.354214	9.0951	6.38147	6.78311e-05	0.000299754	0.424932	mreC	cell shape determining protein MreC
b2961	0.370596	7.60355	6.38006	6.79583e-05	0.000300011	0.501121	mutY	adenine DNA glycosylase
b0750	0.617314	4.40461	6.36755	6.90924e-05	0.000304708	1.06676	nadA	quinolinate synthase
b3046	-1.15002	2.36012	-6.36332	6.94801e-05	0.000306107	1.5841	yqiG	putative outer membrane usher protein YqiG
b0084	0.321276	7.81444	6.36032	6.97566e-05	0.000307014	0.456374	ftsI	peptidoglycan DD-transpeptidase FtsI
b2910	-0.31062	7.99856	-6.35507	7.02439e-05	0.000308538	0.437	zapA	cell division protein ZapA
b0711	0.470138	5.35119	6.35506	7.02448e-05	0.000308538	0.826445	pxpB	5-oxoprolinase component B
b1650	0.349784	6.75007	6.34768	7.09355e-05	0.000311256	0.551832	nemA	N-ethylmaleimide reductase
b1766	0.312796	7.71604	6.34572	7.11203e-05	0.000311752	0.442926	sppA	protease IV%2C a signal peptide peptidase
b0459	0.323692	7.34843	6.34018	7.16454e-05	0.000313737	0.467948	maa	maltose O-acetyltransferase
b0178	-0.291939	9.40124	-6.33689	7.19585e-05	0.000314791	0.352894	skp	periplasmic chaperone Skp
b0827	0.394158	6.77014	6.33607	7.20366e-05	0.000314816	0.532861	moeA	molybdopterin molybdotransferase
b3325	-0.823649	3.17432	-6.33317	7.23154e-05	0.000315717	1.32812	gspD	Type II secretion system protein GspD
b2168	0.473294	9.27087	6.33024	7.25972e-05	0.000316629	0.347007	fruK	1-phosphofructokinase
b4308	-0.960187	2.72242	-6.31547	7.40368e-05	0.000322583	1.41928	yjhR	KpLE2 phage-like element%3B PLD-like domain-containing protein YjhR
b0134	0.363471	7.52239	6.31385	7.4197e-05	0.000322958	0.413982	panB	3-methyl-2-oxobutanoate hydroxymethyltransferase
b2392	-0.557005	5.84346	-6.31096	7.44828e-05	0.000323877	0.662578	mntH	Mn(2(+))/Fe(2(+)): H(+) symporter MntH
b3529	0.374725	6.83313	6.29818	7.57611e-05	0.000329106	0.469845	pdeK	putative c-di-GMP phosphodiesterase PdeK
b4403	-0.59496	4.7155	-6.29488	7.60957e-05	0.000330034	0.893027	yjtD	putative rRNA methyltransferase
b1717	-0.312811	11.767	-6.29457	7.61266e-05	0.000330034	0.235359	rpmI	50S ribosomal subunit protein L35
b1667	-0.384551	7.79555	-6.28921	7.66731e-05	0.000332072	0.357691	ydhR	putative monooxygenase YdhR
b0838	0.488429	5.41464	6.2839	7.72181e-05	0.000334099	0.711247	gstB	glutathione S-transferase GstB
b3174	-0.378336	7.68006	-6.2789	7.7736e-05	0.000335441	0.351936	leuU	tRNA-Leu
b3336	0.61883	4.26262	6.27881	7.77455e-05	0.000335441	0.975091	bfr	bacterioferritin
b2032	-0.746756	6.84873	-6.27867	7.77598e-05	0.000335441	0.448141	wbbK	putative lipopolysaccharide biosynthesis protein
b3089	-0.368777	6.55316	-6.27223	7.8432e-05	0.000338005	0.47546	sstT	serine/threonine:Na(+) symporter
b3383	-0.702724	3.97271	-6.26254	7.9454e-05	0.000342069	1.02809	yhfZ	putative DNA-binding transcriptional regulator YhfZ
b4006	0.433619	5.64187	6.25492	8.02688e-05	0.000345235	0.619243	purH	bifunctional AICAR transformylase/IMP cyclohydrolase
b4005	0.539485	5.09304	6.23727	8.21898e-05	0.000353148	0.71851	purD	phosphoribosylamine--glycine ligase
b3592	0.504511	4.99647	6.23638	8.22878e-05	0.00035322	0.738893	yibF	glutathione transferase-like protein YibF
b1718	-0.280517	12.1354	-6.23437	8.25095e-05	0.000353537	0.140889	infC	translation initiation factor IF-3
b1480	0.974728	2.44672	6.23424	8.25244e-05	0.000353537	1.36648	sra	30S ribosomal subunit protein S22
b2683	0.495164	5.12816	6.22414	8.36502e-05	0.000358006	0.690866	ygaH	L-valine exporter subunit YgaH
b3626	-0.489319	6.14834	-6.2197	8.41511e-05	0.000359796	0.471132	waaJ	UDP-glucose:(glucosyl)LPS alpha-1%2C2-glucosyltransferase
b2250	0.488169	5.93467	6.21596	8.45751e-05	0.000361253	0.503454	yfaZ	putative porin YfaZ
b2518	-0.373188	8.64771	-6.2129	8.49236e-05	0.000362385	0.200047	ndk	nucleoside diphosphate kinase
b3260	-0.309172	10.5908	-6.21026	8.52253e-05	0.000363316	0.141607	dusB	tRNA-dihydrouridine synthase B
b3511	-1.33098	1.60988	-6.20861	8.54147e-05	0.000363766	1.54839	hdeD	acid-resistance membrane protein
b0735	0.391173	6.26005	6.20599	8.57161e-05	0.000364505	0.427153	ybgE	cyd operon protein YbgE
b2815	-0.366837	7.55531	-6.205	8.58307e-05	0.000364505	0.256187	metW	tRNA-Met
b3980	0.321084	12.4128	6.20492	8.58398e-05	0.000364505	0.0925132	tufB	translation elongation factor Tu 2
b3652	-0.381649	7.53325	-6.20085	8.63105e-05	0.000366145	0.252334	recG	ATP-dependent DNA helicase RecG
b0796	0.559235	4.44127	6.19291	8.72383e-05	0.000369393	0.807983	cecR	DNA-binding transcriptional dual regulator CecR
b1208	0.323659	7.9616	6.19285	8.72462e-05	0.000369393	0.206335	ispE	4-(cytidine 5'-diphospho)-2-C-methyl-D-erythritol kinase
b2996	-0.892822	2.78669	-6.17796	8.90147e-05	0.000376514	1.2057	hybA	hydrogenase 2 iron-sulfur protein
b2608	-0.262277	12.3351	-6.17625	8.92202e-05	0.000377016	0.05276	rimM	ribosome maturation factor RimM
b1890	-1.86801	0.31499	-6.17334	8.95717e-05	0.000378134	1.74213	motA	motility protein A
b3341	-0.272467	12.3584	-6.15318	9.20447e-05	0.000388048	0.0188536	rpsG	30S ribosomal subunit protein S7
b0369	0.330399	7.75653	6.15274	9.20989e-05	0.000388048	0.162814	hemB	porphobilinogen synthase
b4020	0.532088	4.9358	6.14418	9.31713e-05	0.000392186	0.62074	yjbB	putative inorganic phosphate export protein
b2894	0.335829	6.8466	6.14152	9.35079e-05	0.000393222	0.242229	xerD	site-specific recombinase
b3636	-0.329721	10.1318	-6.13408	9.44546e-05	0.000396819	0.0425055	rpmG	50S ribosomal subunit protein L33
b4198	0.895843	2.75911	6.13043	9.4923e-05	0.000398402	1.13893	ulaF	L-ribulose-5-phosphate 4-epimerase UlaF
b1308	0.623815	4.50571	6.12911	9.50936e-05	0.000398732	0.701415	pspE	thiosulfate sulfurtransferase PspE
b4130	-0.712708	3.51816	-6.12518	9.56005e-05	0.000400471	0.943331	dtpC	dipeptide/tripeptide:H(+) symporter DtpC
b0141	-1.01652	2.49202	-6.11869	9.6446e-05	0.000403624	1.19864	yadN	putative fimbrial protein YadN
b1237	0.3383	11.1848	6.1161	9.67854e-05	0.000404654	-0.00883915	hns	DNA-binding transcriptional dual regulator H-NS
b0114	0.276829	13.1314	6.10375	9.8423e-05	0.000410814	-0.0687227	aceE	pyruvate dehydrogenase E1 component
b2705	0.845437	3.01763	6.10357	9.84477e-05	0.000410814	1.03498	srlD	sorbitol-6-phosphate 2-dehydrogenase
b1880	-1.79393	0.462233	-6.10172	9.86955e-05	0.000411452	1.62197	flhB	flagellar biosynthesis protein FlhB
b4379	1.26587	2.04491	6.0962	9.94388e-05	0.000414154	1.28038	yjjW	putative glycyl-radical enzyme activating enzyme YjjW
b1635	0.64149	4.52974	6.09069	0.000100186	0.000416867	0.640322	gstA	glutathione S-transferase GstA
b1253	-0.405969	5.87362	-6.08971	0.000100321	0.000417028	0.334511	yciA	acyl-CoA thioesterase
b4162	0.385664	6.55593	6.08624	0.000100795	0.000418597	0.204615	orn	oligoribonuclease
b3253	0.887792	4.61331	6.07699	0.000102074	0.000423503	0.606113	yhdH	acrylyl-CoA reductase
b3917	0.62171	4.58542	6.06547	0.000103689	0.000429794	0.590532	sbp	sulfate/thiosulfate ABC transporter periplasmic binding protein Sbp
b0687	0.314784	8.05218	6.04366	0.000106823	0.000442364	-0.0164374	seqA	SeqA%2C negative modulator of initiation of replication
b1451	-0.303069	7.55533	-6.03142	0.000108627	0.000449406	0.00327497	yncD	putative TonB-dependent outer membrane receptor
b1877	-0.808512	3.43746	-6.02634	0.000109386	0.000452113	0.823524	yecT	protein YecT
b2677	-0.98168	2.63901	-6.02443	0.000109671	0.000452863	1.02483	proV	glycine betaine ABC transporter ATP binding subunit ProV
b2964	0.372684	6.47857	6.02373	0.000109777	0.000452871	0.125369	nupG	nucleoside:H(+) symporter NupG
b0544	-1.10903	2.10917	-6.02302	0.000109883	0.000452877	1.15871	ybcK	DLP12 prophage%3B putative recombinase
b1118	0.301574	7.54698	6.01956	0.000110406	0.0004546	-0.0143995	lolE	lipoprotein release complex - inner membrane subunit
b2316	0.299061	9.54456	6.0025	0.00011302	0.000464923	-0.134993	accD	acetyl-CoA carboxyltransferase subunit beta
b4323	0.499215	4.93247	6.00102	0.000113249	0.000465426	0.412505	uxuB	D-mannonate oxidoreductase
b0085	0.325767	8.12138	5.99245	0.00011459	0.000470492	-0.0956762	murE	UDP-N-acetylmuramoyl-L-alanyl-D-glutamate--2%2C6-diaminopimelate ligase
b1520	-0.472916	5.12591	-5.98808	0.00011528	0.000472877	0.350674	yneE	conserved inner membrane protein YneE
b1869	-0.466086	5.25269	-5.9873	0.000115404	0.00047294	0.320179	yecN	putative inner membrane protein
b2569	0.288543	10.0455	5.98635	0.000115555	0.000473112	-0.171422	lepA	elongation factor 4
b2037	-0.737783	7.13564	-5.98223	0.000116211	0.00047535	-0.0192833	rfbX	polyisoprenol-linked O-antigen repeat unit flippase
b3434	-0.506142	5.28788	-5.97746	0.000116977	0.00047803	0.298916	yhgN	putative inner membrane protein
b2552	0.478645	4.95128	5.97138	0.00011796	0.000481596	0.364219	hmp	nitric oxide dioxygenase
b2534	-0.442752	5.64237	-5.96799	0.000118512	0.000483396	0.205054	yfhR	putative peptidase
b3169	-0.284518	11.1895	-5.96606	0.000118827	0.000484226	-0.228708	nusA	transcription termination/antitermination protein NusA
b1605	-0.34546	6.76486	-5.96103	0.000119654	0.00048714	-0.00868901	ydgI	putative arginine:ornithine antiporter
b1834	-0.381567	6.44064	-5.94747	0.000121911	0.000495865	0.0214088	yebT	intermembrane transport protein YebT
b2599	0.374427	6.82118	5.93519	0.000123998	0.00050388	-0.0561714	pheA	fused chorismate mutase/prephenate dehydratase
b3147	0.322893	7.66187	5.92879	0.000125099	0.000507877	-0.157886	lpoA	outer membrane lipoprotein - activator of MrcA activity
b3153	2.90183	-0.484484	5.92583	0.000125612	0.000509484	1.49424	yhbO	protein/nucleic acid deglycase 2
b1545	-0.757381	3.75846	-5.9239	0.000125948	0.000510373	0.5916	pinQ	Qin prophage%3B putative site-specific recombinase
b1539	0.324952	6.77629	5.91985	0.000126655	0.00051276	-0.0729245	ydfG	3-hydroxy acid dehydrogenase
b4750	-0.388838	7.15537	-5.90945	0.000128493	0.000519714	-0.134766	ynfS	Qin prophage%3B protein YnfS
b2598	1.1449	1.94321	5.90599	0.00012911	0.000521724	1.02459	pheL	phe operon leader peptide
b3515	-0.854845	3.00126	-5.90242	0.000129751	0.000523828	0.752348	gadW	DNA-binding transcriptional dual regulator GadW
b2171	0.360956	7.96819	5.90098	0.00013001	0.000524384	-0.221175	yeiP	elongation factor P family protein
b2797	-0.357467	9.58522	-5.8959	0.000130929	0.000527604	-0.293385	sdaB	L-serine deaminase II
b1187	0.340259	7.73311	5.89444	0.000131194	0.00052818	-0.214238	fadR	DNA-binding transcriptional dual regulator FadR
b1597	-1.6386	1.00979	-5.88805	0.000132364	0.000532396	1.22566	asr	acid shock protein
b2040	-0.308005	8.03913	-5.88666	0.000132619	0.000532931	-0.246405	rfbD	dTDP-4-dehydrorhamnose reductase
b1707	-0.846174	4.12161	-5.88485	0.000132953	0.000533779	0.448882	ydiV	anti-FlhDC factor
b1092	-0.298691	9.2155	-5.86988	0.000135748	0.000544344	-0.321945	fabD	[acyl-carrier-protein] S-malonyltransferase
b1537	1.28822	1.7093	5.86942	0.000135835	0.000544344	1.03339	ydeJ	conserved protein YdeJ
b0160	0.504355	5.67526	5.86317	0.00013702	0.000548586	0.0408454	dgt	dGTP triphosphohydrolase
b1715	-0.991944	2.25212	-5.85058	0.000139444	0.000557777	0.867659	pheM	pheST-ihfA operon leader peptide
b4312	-0.662938	3.83815	-5.84969	0.000139619	0.000557961	0.460419	fimB	regulator for fimA
b4756	-1.11562	2.19855	-5.84069	0.000141381	0.000564486	0.873627	yqiD	protein YqiD
b1727	0.419681	5.99168	5.83653	0.000142203	0.0005672	-0.0640874	hxpB	hexitol phosphatase B
b0840	0.409633	6.08316	5.83593	0.000142322	0.0005672	-0.0829215	deoR	DNA-binding transcriptional repressor DeoR
b1623	0.338929	8.03667	5.834	0.000142707	0.00056821	-0.325314	add	adenosine deaminase
b3974	-0.402313	7.28581	-5.82656	0.000144196	0.000573616	-0.272533	coaA	pantothenate kinase
b3476	-0.649442	4.06717	-5.81867	0.000145795	0.000579445	0.356901	nikA	Ni(2(+)) ABC transporter periplasmic binding protein
b2520	0.292345	7.91095	5.81695	0.000146146	0.00058031	-0.342685	yfhM	alpha2-macroglobulin
b1540	-0.368229	6.91528	-5.80738	0.000148115	0.000587198	-0.257238	ydfH	DNA-binding transcriptional repressor YdfH
b3229	0.281682	9.52601	5.80721	0.000148151	0.000587198	-0.424154	sspA	stringent starvation protein A
b0097	0.30918	7.90977	5.80617	0.000148367	0.000587518	-0.358699	secM	SecA translation regulator
b3202	0.29813	8.90504	5.80498	0.000148613	0.000587957	-0.409337	rpoN	RNA polymerase%2C sigma 54 (sigma N) factor
b3280	-0.452184	5.59494	-5.8043	0.000148756	0.000587985	-0.0273524	yrdB	conserved protein YrdB
b1036	-0.316752	6.83828	-5.80341	0.000148942	0.000588185	-0.253542	ycdZ	putative inner membrane protein
b1090	-0.363668	9.65404	-5.80035	0.000149581	0.000590173	-0.437643	plsX	putative phosphate acyltransferase
b0449	0.368135	6.72928	5.78279	0.000153308	0.000604112	-0.26999	mdlB	ABC transporter family protein MdlB
b3779	-0.293462	9.045	-5.78213	0.000153449	0.000604112	-0.447887	gpp	guanosine-5'-triphosphate%2C3'-diphosphate phosphatase
b4135	0.455093	5.47378	5.78175	0.000153531	0.000604112	-0.037036	yjdC	putative DNA-binding transcriptional regulator YjdC
b1541	-0.658222	3.93032	-5.78003	0.000153903	0.000605027	0.33326	ydfZ	putative selenoprotein YdfZ
b3240	-0.57269	4.10593	-5.77634	0.000154701	0.000607615	0.282607	aaeB	aromatic carboxylic acid efflux pump subunit AaeB
b1793	0.782284	4.13343	5.77132	0.000155795	0.000611358	0.269119	yoaF	DUF333 domain-containing lipoprotein YoaF
b2033	-0.523205	6.15399	-5.76827	0.000156466	0.000613436	-0.192478	wbbJ	putative acyl transferase
b2157	0.4154	6.05936	5.76512	0.000157159	0.000615314	-0.184113	yeiE	putative LysR-type transcriptional regulator YeiE
b2308	-0.553528	4.34912	-5.76481	0.000157228	0.000615314	0.205239	hisQ	lysine/arginine/ornithine ABC transporter/histidine ABC transporter%2C membrane subunit HisQ
b1921	-1.81486	0.50608	-5.75322	0.000159811	0.000624861	1.12744	fliZ	DNA-binding transcriptional regulator FliZ
b4423	1.61112	1.53932	5.74984	0.000160572	0.00062727	0.913134	ldrC	small toxic polypeptide LdrC
b2530	0.257249	10.1556	5.74543	0.000161573	0.000630615	-0.532736	iscS	cysteine desulfurase
b3533	-0.591619	4.52291	-5.74214	0.000162323	0.000632972	0.129838	bcsA	cellulose synthase catalytic subunit
b1035	0.347301	6.38352	5.73477	0.000164016	0.000639002	-0.288399	ycdY	chaperone protein YcdY
b4164	-0.541411	7.53673	-5.73211	0.000164634	0.000640833	-0.437427	glyX	tRNA-Gly
b0910	0.293159	9.06997	5.72559	0.000166153	0.000646168	-0.533885	cmk	cytidylate kinase
b0081	0.290884	7.83844	5.72468	0.000166368	0.000646424	-0.476238	mraZ	DNA-binding transcriptional repressor MraZ
b1025	-0.92552	2.75914	-5.71929	0.000167638	0.000650776	0.545195	dgcT	putative diguanylate cyclase DgcT
b0413	0.355876	6.10641	5.71841	0.000167846	0.000651001	-0.263839	nrdR	NrdR transcriptional repressor
b3782	-0.574192	8.56764	-5.70968	0.00016993	0.000658496	-0.537993	rhoL	rho operon leader peptide
b4213	0.476988	5.38394	5.70832	0.000170255	0.000659075	-0.126943	cpdB	2'3' cyclic nucleotide phosphodiesterase/3' nucleotidase
b3262	-0.585021	4.12281	-5.70779	0.000170382	0.000659075	0.176186	yhdJ	DNA adenine methyltransferase
b0849	0.794609	4.58442	5.70285	0.000171578	0.000663111	0.0567443	grxA	reduced glutaredoxin 1
b0135	-1.1737	1.97987	-5.70073	0.000172091	0.000663969	0.720557	yadC	fimbrial tip-adhesin YadC
b3846	0.784115	2.99718	5.70067	0.000172106	0.000663969	0.44662	fadB	dodecenoyl-CoA delta-isomerase%2C enoyl-CoA hydratase%2C 3-hydroxybutyryl-CoA epimerase%2C 3-hydroxyacyl-CoA dehydrogenase
b0907	0.315326	7.82895	5.69691	0.000173025	0.000666921	-0.517356	serC	phosphoserine/phosphohydroxythreonine aminotransferase
b1004	0.90214	2.49933	5.69394	0.000173753	0.000669133	0.56538	wrbA	NAD(P)H:quinone oxidoreductase
b3809	0.319959	7.21377	5.68573	0.000175786	0.000676362	-0.478339	dapF	diaminopimelate epimerase
b4138	0.285112	8.11193	5.68272	0.000176537	0.000678179	-0.557363	dcuA	C4-dicarboxylate transporter DcuA
b3629	-0.739903	5.93653	-5.68258	0.00017657	0.000678179	-0.273663	waaS	lipopolysaccharide core biosynthesis protein
b2603	-0.524615	4.75138	-5.67443	0.000178623	0.000685457	-0.0276595	yfiR	DUF4154 domain-containing protein YfiR
b4446	-0.600948	4.06913	-5.67126	0.000179428	0.000687073	0.134963	sibC	small RNA SibC
b2606	-0.256748	11.4891	-5.67109	0.000179471	0.000687073	-0.676639	rplS	50S ribosomal subunit protein L19
b0797	-0.32505	8.74342	-5.6709	0.000179518	0.000687073	-0.60499	rhlE	ATP-dependent RNA helicase RhlE
b1728	-0.450409	5.34805	-5.66925	0.000179941	0.000688083	-0.175749	ydjM	putative inner membrane protein regulated by LexA
b1840	-0.308018	6.94458	-5.66657	0.000180624	0.00069009	-0.473633	yebZ	putative inner membrane protein
b0874	-0.433329	5.55367	-5.66459	0.000181133	0.000691425	-0.228671	lysO	L-lysine exporter
b3825	0.316192	6.74802	5.66274	0.000181609	0.000692632	-0.454066	pldB	lysophospholipase L2
b1563	0.45723	4.91304	5.65926	0.00018251	0.000695461	-0.0925539	relE	Qin prophage%3B mRNA interferase toxin RelE
b3929	0.358134	6.74404	5.6574	0.000182993	0.000696688	-0.461329	rraA	ribonuclease E inhibitor protein A
b0032	0.453843	5.02093	5.65656	0.00018321	0.000696902	-0.121851	carA	carbamoyl phosphate synthetase subunit alpha
b3228	0.274819	8.54601	5.65461	0.000183719	0.000698121	-0.622221	sspB	ClpXP protease specificity-enhancing factor
b4078	0.500052	4.56545	5.6541	0.000183851	0.000698121	-0.0176023	yjcO	Sel1 repeat-containing protein YjcO
b1854	0.314753	8.10807	5.65159	0.00018451	0.000700009	-0.604249	pykA	pyruvate kinase II
b2911	-0.327925	8.15132	-5.64336	0.00018668	0.000707623	-0.618652	ssrS	6S RNA
b2953	0.438285	5.46534	5.6408	0.000187362	0.000709591	-0.247672	yggU	conserved protein YggU
b4205	-1.49275	0.843953	-5.63994	0.00018759	0.000709836	0.893035	ytfA	putative transcriptional regulator YtfA
b0199	0.456177	6.02583	5.63513	0.000188879	0.000714092	-0.373305	metN	L-methionine/D-methionine ABC transporter ATP binding subunit
b0414	0.287024	7.5405	5.63409	0.000189159	0.000714526	-0.589552	ribD	fused diaminohydroxyphosphoribosylaminopyrimidine deaminase/5-amino-6-(5-phosphoribosylamino)uracil reductase
b2809	1.1202	2.28345	5.62902	0.000190531	0.000719083	0.529194	ygdI	DUF903 domain-containing lipoprotein YgdI
b2320	0.302311	7.07139	5.6277	0.000190888	0.000719806	-0.55004	pdxB	erythronate-4-phosphate dehydrogenase
b0931	0.264393	8.66065	5.61844	0.000193425	0.000728739	-0.682016	pncB	nicotinate phosphoribosyltransferase
b1874	0.399836	5.73177	5.61747	0.000193691	0.00072911	-0.341734	cutC	protein CutC
b4322	0.728414	4.77378	5.61348	0.000194798	0.000732641	-0.124926	uxuA	D-mannonate dehydratase
b4488	0.370671	6.12516	5.6085	0.000196186	0.000737224	-0.433685	ilvG	acetolactate synthase II subunit IlvG%2C N-terminal fragment (pseudogene)
b3821	0.316093	6.97935	5.60594	0.000196905	0.000739289	-0.571582	pldA	outer membrane phospholipase A
b3342	-0.255308	11.8501	-5.59536	0.000199903	0.000749895	-0.799935	rpsL	30S ribosomal subunit protein S12
b0869	0.374063	5.77946	5.5917	0.000200951	0.000753176	-0.391212	ybjT	putative NAD(P)-dependent oxidoreductase YbjT
b1769	-0.916861	2.3705	-5.58002	0.000204337	0.000765206	0.433712	ydjE	putative transporter YdjE
b2424	1.18059	1.7052	5.57513	0.000205771	0.000769915	0.595487	cysU	sulfate/thiosulfate ABC transporter inner membrane subunit CysU
b0221	0.716503	3.68572	5.56316	0.000209331	0.000782061	0.0652684	fadE	acyl-CoA dehydrogenase
b0006	0.365085	5.83424	5.563	0.000209378	0.000782061	-0.446374	yaaA	peroxide stress resistance protein YaaA
b3403	0.269524	9.64113	5.56199	0.000209683	0.000782529	-0.798234	pck	phosphoenolpyruvate carboxykinase (ATP)
b0709	-0.560766	4.01512	-5.5576	0.000211007	0.000786794	-0.0252804	dtpD	dipeptide:H(+) symporter DtpD
b3706	-0.283719	7.33175	-5.55575	0.000211568	0.00078821	-0.687926	mnmE	5-carboxymethylaminomethyluridine-tRNA synthase GTPase subunit
b3518	-0.773051	3.09929	-5.55247	0.000212566	0.000791249	0.202171	ccp	cytochrome c peroxidase
b1536	1.3262	1.10514	5.54843	0.0002138	0.00079516	0.695289	ydeI	BOF family protein YdeI
b0481	-0.499993	4.76907	-5.53478	0.000218035	0.000810215	-0.244388	ybaK	Cys-tRNA(Pro) and Cys-tRNA(Cys) deacylase
b3544	0.316248	6.95757	5.52854	0.000219999	0.000816818	-0.687168	dppA	dipeptide ABC transporter periplasmic binding protein
b0244	-0.753429	3.32787	-5.52585	0.000220855	0.000819294	0.103681	thrW	tRNA-Thr
b1716	-0.285994	12.1579	-5.52217	0.000222027	0.000822938	-0.9187	rplT	50S ribosomal subunit protein L20
b2924	0.334881	7.45954	5.52071	0.000222492	0.000823628	-0.755188	mscS	small conductance mechanosensitive channel MscS
b2893	0.369369	6.89907	5.5204	0.000222592	0.000823628	-0.691708	dsbC	protein disulfide isomerase DsbC
b4278	0.41789	5.15294	5.51657	0.000223825	0.000827486	-0.366299	insG	KpLE2 phage-like element%3B IS4 putative transposase
b1651	0.324874	6.33597	5.5111	0.000225593	0.000833313	-0.62075	gloA	glyoxalase I
b1556	-1.05867	2.21909	-5.49824	0.000229817	0.000848194	0.355331	essQ	Qin prophage%3B putative S lysis protein
b4156	-0.486077	4.61719	-5.49546	0.000230738	0.000850268	-0.269022	yjeM	putative transporter YjeM
b0876	0.489538	4.92889	5.49537	0.00023077	0.000850268	-0.345841	ybjD	DUF2813 domain-containing protein YbjD
b0947	0.326936	6.41033	5.48744	0.000233426	0.000859325	-0.669507	ycbX	6-N-hydroxylaminopurine resistance protein
b3020	-0.580472	4.29886	-5.48063	0.000235734	0.00086643	-0.212724	ygiS	putative deoxycholate binding periplasmic protein
b2795	0.287817	7.21294	5.48057	0.000235755	0.00086643	-0.791608	ppnN	nucleotide 5'-monophosphate nucleosidase
b1747	1.49531	0.930087	5.47588	0.000237358	0.000871584	0.629856	astA	arginine N-succinyltransferase
b1478	-0.481838	4.67814	-5.46679	0.000240499	0.00088237	-0.327583	adhP	ethanol dehydrogenase/alcohol dehydrogenase
b4024	-0.407385	5.7859	-5.45774	0.000243673	0.000893261	-0.595175	lysC	aspartate kinase III
b3214	-0.624215	3.80544	-5.45175	0.000245795	0.000900234	-0.133317	gltF	periplasmic protein GltF
b1430	-0.472297	5.00921	-5.45121	0.000245989	0.000900234	-0.429993	tehB	tellurite methyltransferase
b3157	0.403752	6.04549	5.44395	0.00024859	0.000908986	-0.670693	yhbT	SCP2 domain-containing protein YhbT
b3365	-0.597224	4.89913	-5.43504	0.000251825	0.000920039	-0.427157	nirB	nitrite reductase catalytic subunit NirB
b1624	0.343325	6.34438	5.42721	0.000254706	0.000929784	-0.751373	ydgJ	putative oxidoreductase YdgJ
b1647	0.370196	5.7443	5.42598	0.000255163	0.000930669	-0.638406	ydhF	putative oxidoreductase
b0920	0.759155	3.95072	5.42327	0.000256167	0.00093355	-0.214981	elyC	envelope biogenesis factor
b2955	0.299579	7.19682	5.42227	0.000256541	0.000934128	-0.879806	yggW	putative coproporphyrinogen-III oxidase-like protein YggW
b1385	-0.508645	4.39041	-5.41896	0.000257777	0.000937827	-0.331535	feaB	phenylacetaldehyde dehydrogenase
b2399	-0.496601	4.90358	-5.4184	0.000257989	0.000937827	-0.455507	yfeD	putative DNA-binding transcriptional regulator YfeD
b2819	0.361022	6.12933	5.41228	0.000260296	0.000945424	-0.735878	recD	exodeoxyribonuclease V subunit RecD
b2938	0.309194	10.5161	5.40352	0.000263637	0.000956757	-1.06409	speA	arginine decarboxylase%2C biosynthetic
b4473	0.400765	5.23563	5.40194	0.000264242	0.000958151	-0.562168	smf	protein Smf
b0181	-0.365809	9.18809	-5.39616	0.000266476	0.000965446	-1.04124	lpxA	UDP-N-acetylglucosamine acyltransferase
b3623	-0.556201	5.77435	-5.39475	0.000267026	0.000966568	-0.686482	waaU	putative ADP-heptose:LPS heptosyltransferase 4
b3415	-0.267586	7.64767	-5.39407	0.00026729	0.000966568	-0.966562	gntT	high-affinity gluconate transporter
b0808	0.749135	2.90383	5.39365	0.000267453	0.000966568	0.00294608	ybiO	moderate conductance mechanosensitive channel
b4713	-0.96879	2.05258	-5.39114	0.000268434	0.000969307	0.228317	agrB	small RNA AgrB
b0223	0.296627	7.04144	5.3889	0.000269311	0.000971666	-0.913317	yafJ	putative amidotransferase
b0967	-0.285404	7.67782	-5.36696	0.000278078	0.00100121	-1.01105	rlmI	23S rRNA m(5)C1962 methyltransferase
b3787	0.258186	8.20371	5.36688	0.000278109	0.00100121	-1.04762	wecC	UDP-N-acetyl-D-mannosamine dehydrogenase
b4523	-0.883128	2.78632	-5.36668	0.000278191	0.00100121	0.00130806	yciX	uncharacterized protein YciX
b2593	-0.327937	6.9515	-5.3617	0.000280224	0.00100769	-0.942682	pgeF	polyphenol oxidase YfiH
b0198	0.403646	5.86774	5.35919	0.000281252	0.00101055	-0.767067	metI	L-methionine/D-methionine ABC transporter membrane subunit
b3967	-0.301108	6.8759	-5.34103	0.000288832	0.00103693	-0.965136	murI	glutamate racemase
b0783	0.410519	5.35688	5.33781	0.000290195	0.00104096	-0.689684	moaC	cyclic pyranopterin monophosphate synthase
b0234	-0.879707	3.00824	-5.33377	0.000291918	0.00104628	-0.106833	yafP	putative acyltransferase with acyl-CoA N-acyltransferase domain
b3874	-0.886835	3.12519	-5.32559	0.000295443	0.00105804	-0.147867	yihN	putative transporter YihN
b1202	-0.596984	3.62679	-5.325	0.000295696	0.00105808	-0.285211	ycgV	putative autotransporter adhesin YcgV
b0475	0.368581	5.86628	5.32142	0.000297257	0.00106278	-0.826021	hemH	ferrochelatase
b0142	-0.415508	6.16224	-5.32086	0.000297499	0.00106278	-0.881485	folK	2-amino-4-hydroxy-6-hydroxymethyldihydropteridine diphosphokinase
b2589	-2.05564	-0.391533	-5.30951	0.000302503	0.00107976	0.607812	rrlG	23S ribosomal RNA
b3586	-1.2547	1.36916	-5.301	0.000306307	0.00109245	0.269369	yiaV	putative membrane fusion protein
b3554	0.266335	8.56361	5.3	0.00030676	0.00109316	-1.16969	yiaF	DUF3053 domain-containing protein YiaF
b4670	-0.959321	2.47704	-5.29942	0.000307022	0.0010932	-0.0204388	yjeV	uncharacterized protein YjeV
b1949	-2.01763	-0.364299	-5.29825	0.000307551	0.00109419	0.587236	fliQ	flagellar biosynthesis protein FliQ
b1693	0.484741	4.5157	5.29713	0.000308056	0.00109444	-0.554486	aroD	3-dehydroquinate dehydratase
b2980	-0.497224	4.78311	-5.29698	0.000308126	0.00109444	-0.615381	glcC	DNA-binding transcriptional dual regulator GlcC
b1307	0.982432	1.95059	5.28673	0.000312808	0.00111016	0.0886669	pspD	phage shock protein D
b4279	-1.22791	1.67676	-5.28551	0.000313372	0.00111125	0.171665	yjhB	putative sialic acid transporter
b4011	-0.785625	2.84823	-5.28294	0.000314561	0.00111456	-0.148621	yjaA	stress response protein
b2976	0.494804	4.71874	5.28146	0.000315251	0.00111609	-0.627576	glcB	malate synthase G
b3717	0.711939	4.08199	5.28034	0.000315767	0.00111701	-0.470379	cbrC	UPF0167 family colicin E2 tolerance protein CbrC
b1677	-0.622254	11.1758	-5.27841	0.000316667	0.00111929	-1.27487	lpp	murein lipoprotein
b0474	-0.260931	8.97522	-5.27672	0.000317456	0.00112116	-1.22122	adk	adenylate kinase
b3740	-0.280481	7.14039	-5.27121	0.000320048	0.0011294	-1.10787	rsmG	16S rRNA m(7)G527 methyltransferase
b1678	0.72598	3.3925	5.26613	0.000322454	0.00113697	-0.319223	ldtE	L%2CD-transpeptidase LdtE
b0057	-0.632686	3.97428	-5.25327	0.000328637	0.00115783	-0.482885	yabQ	protein YabQ
b0916	-0.431335	4.84918	-5.24963	0.000330409	0.00116313	-0.706686	ycaQ	winged helix DNA-binding domain-containing protein YcaQ
b2827	0.287736	7.2342	5.24847	0.000330977	0.00116418	-1.15529	thyA	thymidylate synthase
b3650	-0.304331	9.92876	-5.23791	0.000336187	0.00118155	-1.30855	spoT	bifunctional (p)ppGpp synthase/hydrolase SpoT
b3008	0.450437	4.9025	5.23661	0.000336834	0.00118287	-0.741781	metC	cystathionine beta-lyase/L-cysteine desulfhydrase
b0850	0.681241	4.18095	5.234	0.00033814	0.00118649	-0.567673	ybjC	DUF1418 domain-containing protein YbjC
b0441	0.244017	9.72595	5.22874	0.000340781	0.00119417	-1.31794	ppiD	periplasmic folding chaperone
b2899	0.33698	6.32027	5.22855	0.000340879	0.00119417	-1.05739	yqfA	hemolysin-III family protein
b4204	-0.755309	2.77895	-5.22139	0.000344514	0.00120594	-0.227398	yjfZ	protein YjfZ
b0364	-2.41647	-0.895801	-5.21425	0.000348179	0.00121779	0.517988	yaiS	putative deacetylase YaiS
b2535	0.546641	4.12178	5.21319	0.000348726	0.00121872	-0.588336	csiE	stationary phase inducible protein CsiE
b3836	0.279867	6.98716	5.20644	0.000352235	0.00122999	-1.19229	tatA	twin arginine protein translocation system - TatA protein
b1914	-0.284583	6.95258	-5.20348	0.000353787	0.00123442	-1.19122	uvrY	DNA-binding transcriptional activator UvrY
b3749	-0.321317	8.82924	-5.19464	0.000358462	0.00124943	-1.34531	rbsA	ribose ABC transporter ATP binding subunit
b2513	0.263432	8.24175	5.19426	0.000358665	0.00124943	-1.32047	yfgM	ancillary SecYEG translocon subunit
b3508	-1.95157	-0.217229	-5.19208	0.000359832	0.00125249	0.410264	yhiD	inner membrane protein YhiD
b2417	0.229885	10.4221	5.18069	0.000365976	0.00127286	-1.41103	crr	Enzyme IIA(Glc)
b2798	-0.405962	5.72165	-5.1801	0.000366298	0.00127296	-1.01516	ygdG	flap endonuclease
b1231	-0.384114	6.65656	-5.16958	0.000372079	0.00129202	-1.20248	tyrT	tRNA-Tyr
b4272	-1.51965	0.487042	-5.16619	0.000373962	0.00129752	0.252708	insC-6	KpLE2 phage-like element%3B IS2 insertion element repressor InsA
b2298	-0.617475	3.58138	-5.15769	0.000378732	0.00131302	-0.535352	yfcC	putative transporter YfcC
b0115	0.230354	12.263	5.15554	0.00037995	0.00131619	-1.49328	aceF	pyruvate dehydrogenase%2C E2 subunit
b0048	0.309215	6.87416	5.15047	0.000382831	0.00132507	-1.26594	folA	dihydrofolate reductase
b3231	-0.237509	12.5897	-5.1498	0.000383215	0.00132507	-1.50923	rplM	50S ribosomal subunit protein L13
b1809	0.327506	6.412	5.14943	0.000383429	0.00132507	-1.19792	yoaB	RutC family protein YoaB
b3219	-0.658817	3.33727	-5.1401	0.000388807	0.00134259	-0.500446	yhcF	DUF1120 domain-containing protein YhcF
b0882	0.273579	8.44875	5.13646	0.000390927	0.00134884	-1.42245	clpA	ATP-dependent Clp protease ATP-binding subunit ClpA
b3053	0.320588	6.26935	5.12986	0.000394803	0.00136113	-1.20454	glnE	fused glutamine synthetase deadenylase/glutamine synthetase adenylyltransferase
b3986	-0.217019	13.1574	-5.12489	0.000397745	0.00137018	-1.56023	rplL	50S ribosomal subunit protein L12
b1609	0.319492	6.28629	5.1226	0.000399113	0.00137381	-1.21907	rstB	sensory histidine kinase RstB
b2353	-0.724273	3.10385	-5.1185	0.000401569	0.00138117	-0.472812
b0023	-0.261435	11.0092	-5.11692	0.000402521	0.00138335	-1.52625	rpsT	30S ribosomal subunit protein S20
b1091	-0.27798	8.94462	-5.11589	0.000403141	0.00138438	-1.47432	fabH	beta-ketoacyl-[acyl carrier protein] synthase III
b3042	0.279443	6.81502	5.11295	0.000404922	0.0013894	-1.31753	ubiK	ubiquinone biosynthesis accessory factor UbiK
b3361	0.623998	3.85113	5.09718	0.000414605	0.0014215	-0.702744	fic	putative adenosine monophosphate--protein transferase Fic
b3510	-0.851245	2.85944	-5.09427	0.000416415	0.00142658	-0.445333	hdeA	HdeA monomer%2C chaperone active form
b3043	-0.918279	2.49857	-5.08474	0.000422415	0.00144566	-0.3636	ygiL	putative fimbrial protein YgiL
b0855	-0.699153	2.98836	-5.08437	0.00042265	0.00144566	-0.497772	potG	putrescine ABC transporter ATP binding subunit
b2988	-0.292933	7.05381	-5.08014	0.000425342	0.00145259	-1.39983	gss	fused glutathionylspermidine amidase/glutathionylspermidine synthetase
b0854	-0.662146	4.06017	-5.07993	0.000425481	0.00145259	-0.776716	potF	putrescine ABC transporter periplasmic binding protein
b2787	0.849487	2.36596	5.07962	0.000425678	0.00145259	-0.346167	gudD	D-glucarate dehydratase
b4388	0.278684	7.01614	5.07851	0.000426387	0.00145387	-1.39891	serB	phosphoserine phosphatase
b3690	0.76674	2.57602	5.0747	0.000428835	0.00146107	-0.410514	cbrA	colicin M resistance protein
b3123	0.264383	13.54	5.07368	0.000429496	0.00146217	-1.64921	rnpB	RNase P catalytic RNA component
b2687	0.287725	7.35532	5.07259	0.000430201	0.00146342	-1.44684	luxS	S-ribosylhomocysteine lyase
b2232	0.310406	6.86026	5.07107	0.000431181	0.00146561	-1.39034	ubiG	bifunctional 3-demethylubiquinone-8 3-O-methyltransferase and 2-octaprenyl-6-hydroxyphenol methylase
b4061	-0.660262	3.52872	-5.04915	0.000445648	0.0015136	-0.692204	pdeC	c-di-GMP phosphodiesterase PdeC
b0487	0.524391	4.22269	5.04835	0.000446184	0.00151424	-0.874763	cueR	DNA-binding transcriptional dual regulator CueR
b1299	-0.474498	4.34134	-5.0423	0.000450272	0.00152692	-0.911445	puuR	DNA-binding transcriptional repressor PuuR
b3963	0.281044	7.38013	5.03447	0.00045562	0.00154376	-1.51027	fabR	DNA-binding transcriptional repressor FabR
b3187	0.250873	8.16326	5.03399	0.000455951	0.00154376	-1.57102	ispB	all-trans-octaprenyl-diphosphate synthase
b3945	0.667671	3.16317	5.02454	0.000462501	0.00156472	-0.643171	gldA	L-1%2C2-propanediol dehydrogenase/glycerol dehydrogenase
b1958	-0.582663	4.0905	-5.02296	0.000463606	0.00156724	-0.877587	yedI	conserved inner membrane protein YedI
b4233	0.237512	8.46763	5.02199	0.000464286	0.00156832	-1.60602	mpl	UDP-N-acetylmuramate--L-alanyl-gamma-D-glutamyl-meso-2%2C6-diaminoheptanedioate ligase
b3036	0.425569	5.0088	5.01347	0.000470305	0.00158669	-1.12109	ygiA	putative protein YgiA
b2607	-0.215348	12.5408	-5.01326	0.000470454	0.00158669	-1.72613	trmD	tRNA m(1)G37 methyltransferase
b2347	1.02091	1.68314	5.00958	0.000473074	0.00159428	-0.275736	yfdC	inner membrane protein YfdC
b0086	0.247015	8.20116	5.00763	0.000474473	0.00159776	-1.61551	murF	D-alanyl-D-alanine-adding enzyme
b4316	-1.3212	0.949976	-5.0011	0.000479187	0.00161238	-0.0998946	fimC	type 1 fimbriae periplasmic chaperone
b3222	0.71446	3.13178	4.9939	0.00048444	0.0016288	-0.682887	nanK	N-acetylmannosamine kinase
b3591	0.29885	6.29149	4.98956	0.000487629	0.00163825	-1.43269	selA	selenocysteine synthase
b1268	-0.457788	4.59731	-4.97651	0.000497379	0.00166972	-1.07939	yciQ	DUF2207 domain-containing protein YciQ
b3621	-0.278457	6.69196	-4.97464	0.000498793	0.00167317	-1.51999	waaC	ADP-heptose:LPS heptosyltransferase 1
b2733	0.280377	7.85025	4.97107	0.0005015	0.00168095	-1.65205	mutS	DNA mismatch repair protein MutS
b3389	-0.232901	9.89965	-4.9653	0.000505913	0.00169444	-1.74209	aroB	3-dehydroquinate synthase
b2609	-0.248893	10.7056	-4.96381	0.00050706	0.00169697	-1.76419	rpsP	30S ribosomal subunit protein S16
b0912	0.231737	8.63188	4.95627	0.000512901	0.0017152	-1.7189	ihfB	integration host factor subunit beta
b0651	0.419479	5.13865	4.95324	0.00051527	0.00172179	-1.2484	rihA	pyrimidine-specific ribonucleoside hydrolase RihA
b0681	-0.597267	4.16033	-4.94275	0.000523557	0.00174814	-1.02367	chiP	chitobiose outer membrane channel
b1095	-0.224814	10.8644	-4.9405	0.000525353	0.00175202	-1.80558	fabF	beta-ketoacyl-[acyl carrier protein] synthase II
b2292	0.444283	4.65606	4.94028	0.000525526	0.00175202	-1.15473	yfbS	putative transporter YfbS
b3941	-0.526263	4.09251	-4.93578	0.000529144	0.00176273	-1.01972	metF	5%2C10-methylenetetrahydrofolate reductase
b0678	-0.249155	7.64235	-4.93415	0.000530461	0.00176577	-1.69482	nagB	glucosamine-6-phosphate deaminase
b3672	0.667315	3.76738	4.93203	0.00053217	0.0017701	-0.943699	ivbL	ilvBN operon leader peptide
b0095	0.250759	9.26341	4.92937	0.000534338	0.00177511	-1.78339	ftsZ	cell division protein FtsZ
b1300	-0.856031	2.1308	-4.92917	0.000534496	0.00177511	-0.517694	puuC	gamma-glutamyl-gamma-aminobutyraldehyde dehydrogenase
b0532	-0.901975	2.22625	-4.92678	0.000536449	0.00178024	-0.545093	sfmD	putative fimbrial usher protein SfmD
b2041	-0.28875	8.47384	-4.92179	0.000540544	0.00179246	-1.76713	rfbB	dTDP-glucose 4%2C6-dehydratase 1
b4202	-0.216779	11.478	-4.90427	0.000555189	0.00183962	-1.87852	rpsR	30S ribosomal subunit protein S18
b1034	0.328794	6.19611	4.9028	0.00055644	0.00184236	-1.55552	ycdX	zinc-binding phosphatase
b3748	-0.498691	7.74557	-4.89984	0.000558964	0.00184887	-1.75653	rbsD	D-ribose pyranase
b3496	-0.390182	5.14282	-4.89949	0.000559258	0.00184887	-1.33419	dtpB	dipeptide/tripeptide:H(+) symporter DtpB
b3241	-0.616948	3.31082	-4.89825	0.000560322	0.00185098	-0.880224	aaeA	aromatic carboxylic acid efflux pump membrane fusion protein
b2035	-0.723712	6.31433	-4.89494	0.000563166	0.00185839	-1.5789	wbbH	putative O-antigen polymerase
b1298	-0.546654	4.05871	-4.89464	0.000563422	0.00185839	-1.07699	puuD	gamma-glutamyl-gamma-aminobutyrate hydrolase
b2703	1.15006	1.1687	4.89352	0.000564391	0.00186018	-0.330164	srlE	sorbitol-specific PTS enzyme IIBC1 component
b1081	-1.4097	0.845886	-4.89114	0.000566449	0.00186554	-0.245681	flgJ	putative peptidoglycan hydrolase FlgJ
b1193	0.310315	6.20167	4.89021	0.000567255	0.00186678	-1.57699	emtA	lytic murein transglycosylase E
b3624	-0.557437	5.38681	-4.88944	0.00056792	0.00186756	-1.40292	waaZ	lipopolysaccharide core biosynthesis protein WaaZ
b1296	-0.629327	3.68073	-4.88516	0.000571651	0.00187813	-0.995314	puuP	putrescine:H(+) symporter PuuP
b4739	-1.14758	1.13314	-4.88476	0.000571999	0.00187813	-0.329385	ymgL	protein YmgL
b4168	0.390194	5.61171	4.87828	0.000577706	0.00189543	-1.47709	tsaE	N(6)-L-threonylcarbamoyladenine synthase%2C TsaE subunit
b0435	0.442451	6.10075	4.87638	0.000579384	0.00189951	-1.57968	bolA	DNA-binding transcriptional dual regulator BolA
b3282	-0.2903	6.88937	-4.87472	0.000580866	0.00190293	-1.70905	tsaC	threonylcarbamoyl-AMP synthase
b3707	2.7764	-0.922476	4.86649	0.000588236	0.00192562	0.0109186	tnaC	tnaAB operon leader peptide
b2069	-0.335415	6.00853	-4.86314	0.000591263	0.00193407	-1.5824	yegD	HSP70 family protein YegD
b1666	-0.46574	4.5899	-4.86256	0.000591784	0.00193432	-1.26109	valW	tRNA-Val
b0069	0.380171	5.79379	4.85979	0.000594304	0.00194109	-1.54616	sgrR	DNA-binding transcriptional dual regulator SgrR
b2960	0.273049	7.06254	4.8575	0.000596399	0.00194647	-1.76066	trmI	tRNA m(7)G46 methyltransferase
b0673	-0.419305	8.36822	-4.85236	0.000601121	0.00196041	-1.87401	metT	tRNA-Met
b3995	0.330797	5.78524	4.84977	0.00060352	0.00196676	-1.56124	rsd	regulator of sigma D
b1552	-0.470233	6.67209	-4.84774	0.000605398	0.0019714	-1.71957	cspI	Qin prophage%3B cold shock protein CspI
b0066	-0.448101	4.49984	-4.84662	0.000606437	0.00197331	-1.26586	thiQ	thiamine ABC transporter ATP binding subunit
b1079	-1.43884	0.673677	-4.84381	0.000609066	0.00198038	-0.286926	flgH	flagellar L-ring protein
b0894	-0.535192	4.05002	-4.83845	0.000614101	0.00199378	-1.16563	dmsA	dimethyl sulfoxide reductase subunit A
b0490	-0.599332	3.26228	-4.83844	0.000614107	0.00199378	-0.964453	fetA	putative iron ABC exporter ATP-binding subunit FetA
b2957	0.467362	4.72203	4.83133	0.000620858	0.00201419	-1.34654	ansB	L-asparaginase 2
b3486	0.433546	5.00016	4.82554	0.000626417	0.00203071	-1.42214	rbbA	ribosome-associated ATPase
b0775	-0.357626	5.33697	-4.82402	0.00062788	0.00203394	-1.50208	bioB	biotin synthase
b1088	-0.208901	11.533	-4.82234	0.000629502	0.00203767	-2.0129	yceD	DUF177 domain-containing protein YceD
b2630	-0.278097	6.86058	-4.81883	0.000632914	0.00204687	-1.79625	rnlA	CP4-57 prophage%3B RNase LS%2C toxin of the RnlAB toxin-antitoxin system
b0527	0.605139	3.63189	4.81845	0.000633287	0.00204687	-1.09423	ybcI	conserved inner membrane protein YbcI
b1137	-0.791111	2.85489	-4.81769	0.000634031	0.00204775	-0.886423	ymfD	e14 prophage%3B putative SAM-dependent methyltransferase
b2174	-0.321168	6.30925	-4.81102	0.000640572	0.0020661	-1.72287	lpxT	Kdo2-lipid A phosphotransferase
b1668	-0.430871	5.13127	-4.81093	0.000640662	0.0020661	-1.47439	ydhS	FAD/NAD(P) binding domain-containing protein YdhS
b3714	-0.283781	7.40884	-4.80791	0.000643656	0.00207422	-1.87848	adeP	adenine:H(+) symporter
b4026	2.78733	1.32451	4.80232	0.000649221	0.0020906	-0.429587	yjbE	uncharacterized protein YjbE
b1080	-1.26705	0.957119	-4.79922	0.000652334	0.00209906	-0.421894	flgI	flagellar P-ring protein
b4500	-0.577823	3.68384	-4.79618	0.000655399	0.00210737	-1.14074	yfaS	putative macroglobulin family protein%2C N-terminal fragment
b3519	0.511259	3.9712	4.79012	0.000661558	0.0021256	-1.22825	treF	cytoplasmic trehalase
b4136	0.30135	6.29682	4.78337	0.000668486	0.00214627	-1.76772	dsbD	protein disulfide oxidoreductase - DsbDreduced
b0953	0.966948	2.38303	4.77639	0.00067574	0.00216796	-0.831232	rmf	ribosome modulation factor
b3806	0.239825	9.34602	4.75831	0.000694901	0.00222779	-2.06404	cyaA	adenylate cyclase
b1795	-0.630853	3.30385	-4.75549	0.000697948	0.00223343	-1.1095	yeaQ	PF04226 family protein YeaQ
b1180	0.377729	5.62413	4.75533	0.000698119	0.00223343	-1.68026	ycgM	putative isomerase/hydrolase
b2303	-0.283784	6.40154	-4.75525	0.000698204	0.00223343	-1.83019	folX	dihydroneopterin triphosphate 2'-epimerase
b1419	-0.411601	4.78952	-4.75137	0.00070241	0.00224523	-1.49117	ydcA	protein YdcA
b3299	-0.216528	10.4752	-4.7474	0.000706745	0.00225743	-2.11044	rpmJ	50S ribosomal subunit protein L36
b4602	-0.932143	1.74063	-4.74585	0.000708444	0.00225989	-0.708004	ynhF	stress response membrane protein YnhF
b0080	0.242692	7.32218	4.74575	0.000708555	0.00225989	-1.9726	cra	DNA-binding transcriptional dual regulator Cra
b4491	-0.617392	3.30787	-4.74391	0.000710579	0.00226468	-1.12931	ycgH	putative transporter component%2C N-terminal fragment
b3641	-0.256627	7.05389	-4.74033	0.000714538	0.00227486	-1.94988	slmA	nucleoid occlusion factor SlmA
b2342	0.533759	3.67358	4.74007	0.00071482	0.00227486	-1.23379	fadI	3-ketoacyl-CoA thiolase FadI
b3516	-0.500864	3.99193	-4.73634	0.000718969	0.00228638	-1.3181	gadX	DNA-binding transcriptional dual regulator GadX
b3761	-0.634424	2.97873	-4.7289	0.000727325	0.00231127	-1.06874	trpT	tRNA-Trp
b0494	0.37693	5.05541	4.72492	0.000731831	0.00232388	-1.60017	tesA	multifunctional acyl-CoA thioesterase I and protease I and lysophospholipase L1
b0877	0.294657	7.80226	4.71288	0.000745648	0.00236603	-2.06853	ybjX	DUF535 domain-containing protein YbjX
b1797	-1.63987	-0.171472	-4.70698	0.000752527	0.00238611	-0.344404	yeaR	DUF1971 domain-containing protein YeaR
b2559	-0.346563	6.21107	-4.70296	0.000757245	0.00239932	-1.88214	tadA	tRNA adenosine(34) deaminase
b1460	-1.3151	0.873269	-4.69	0.00077268	0.00244644	-0.574957	ydcC	H repeat-associated putative transposase YdcC
b3446	-1.44345	0.645275	-4.68741	0.000775804	0.00245455	-0.52628	yrhB	putative heat shock chaperone
b0482	0.363585	5.60126	4.67605	0.000789666	0.00249658	-1.80574	ybaP	TraB family protein YbaP
b0336	-0.488121	3.86128	-4.65883	0.000811173	0.00256272	-1.41261	codB	cytosine transporter
b2398	-0.445674	4.73974	-4.6541	0.000817201	0.00257989	-1.63869	yfeC	putative DNA-binding transcriptional regulator YfeC
b0432	-0.211271	11.0873	-4.64149	0.000833469	0.00262933	-2.29945	cyoA	cytochrome bo3 ubiquinol oxidase subunit 2
b3645	-0.400956	4.7658	-4.63548	0.000841342	0.00265224	-1.67606	dinD	DNA damage-inducible protein D
b0885	0.315964	5.97324	4.63358	0.000843852	0.00265823	-1.95381	aat	leucyl/phenylalanyl-tRNA--protein transferase
b4255	0.228442	8.28887	4.63032	0.000848167	0.00266988	-2.2353	rraB	ribonuclease E inhibitor protein B
b1139	-0.683023	3.114	-4.6274	0.000852059	0.00268019	-1.26777	lit	e14 prophage%3B cell death peptidase Lit
b2034	-0.634376	6.7744	-4.6244	0.000856073	0.00269087	-2.09787	wbbI	beta-1%2C6-galactofuranosyltransferase
b4064	-0.504834	4.46399	-4.62129	0.000860254	0.00270206	-1.62461	ghxP	guanine/hypoxanthine transporter GhxP
b3302	-0.205717	10.6821	-4.61676	0.000866396	0.00271938	-2.33074	rpmD	50S ribosomal subunit protein L30
b1289	-0.692597	3.4872	-4.6162	0.000867154	0.00271979	-1.38179	ycjD	DUF559 domain-containing protein YcjD
b2007	0.269177	7.70811	4.61238	0.000872369	0.00273418	-2.22738	yeeX	DUF496 domain-containing protein YeeX
b4268	-1.42023	0.346954	-4.61098	0.000874277	0.00273706	-0.590412	idnK	D-gluconate kinase%2C thermosensitive
b3300	-0.194308	13.2171	-4.61078	0.000874549	0.00273706	-2.39633	secY	Sec translocon subunit SecY
b3512	-1.63906	0.0411056	-4.6096	0.000876172	0.00274017	-0.532581	gadE	DNA-binding transcriptional activator GadE
b0480	0.298801	5.94213	4.60229	0.000886285	0.0027698	-1.99957	ushA	5'-nucleotidase/UDP-sugar hydrolase
b2011	0.318042	5.98561	4.59706	0.000893593	0.00279063	-2.01674	sbcB	exodeoxyribonuclease I
b2027	-0.245002	9.35279	-4.59644	0.000894468	0.00279078	-2.33092	wzzB	regulator of length of O-antigen component of lipopolysaccharide chains
b1687	0.288452	6.32622	4.59611	0.000894927	0.00279078	-2.08123	ydiJ	putative FAD-linked oxidoreductase
b2036	-0.650751	7.13998	-4.59315	0.000899104	0.0028018	-2.19738	glf	UDP-galactopyranose mutase
b3697	0.277589	6.57656	4.58947	0.000904314	0.00281513	-2.13336	yidA	sugar phosphatase YidA
b3977	0.225241	9.38431	4.58922	0.000904678	0.00281513	-2.34391	tyrU	tRNA-Tyr
b2349	-0.280511	6.10984	-4.58293	0.000913665	0.00284106	-2.06251	intS	CPS-53 (KpLE1) prophage%3B prophage CPS-53 integrase
b1290	-0.336897	5.41756	-4.58233	0.000914534	0.00284173	-1.91765	sapF	putrescine ABC exporter ATP binding protein SapF
b0853	0.343385	6.29851	4.57855	0.00091998	0.00285661	-2.10516	ybjN	protein YbjN
b1855	0.293952	7.09061	4.57483	0.000925388	0.00287135	-2.22852	lpxM	myristoyl-acyl carrier protein-dependent acyltransferase
b1936	-1.26702	0.722812	-4.5714	0.000930392	0.00288322	-0.736959	intG	putative defective phage integrase
b2106	-0.570079	3.28075	-4.5713	0.000930542	0.00288322	-1.40694	rcnA	Ni(2(+))/Co(2(+)) exporter
b4022	0.27546	6.43239	4.56696	0.000936924	0.00290092	-2.1475	rluF	23S rRNA pseudouridine(2604) and tRNA(Tyr) pseudouridine(35) synthase
b3976	0.345531	7.47624	4.55964	0.000947796	0.0029325	-2.29461	thrU	tRNA-Thr
b3223	0.674404	2.70518	4.55856	0.000949409	0.0029354	-1.28025	nanE	putative N-acetylmannosamine-6-phosphate epimerase
b0897	1.15172	1.28228	4.55601	0.000953234	0.00294513	-0.900174	ycaC	putative hydrolase
b3628	-0.371338	6.44429	-4.55093	0.000960897	0.00296669	-2.17334	waaB	UDP-D-galactose:(glucosyl)lipopolysaccharide-1%2C6-D-galactosyltransferase
b1928	0.299493	6.09974	4.54857	0.000964477	0.00297563	-2.11903	yedD	lipoprotein YedD
b2326	0.260753	6.54829	4.54775	0.000965737	0.0029774	-2.19846	epmC	EF-P-Lys34 hydroxylase
b2404	-0.518845	6.9793	-4.54494	0.000970022	0.00298849	-2.26028	lysV	tRNA-Lys
b3177	0.271663	6.71652	4.54374	0.000971871	0.0029905	-2.23047	folP	dihydropteroate synthase
b4660	-1.26525	0.975334	-4.54362	0.00097205	0.0029905	-0.835478	yhiL	putative uncharacterized protein YhiL
b4385	0.267383	6.61561	4.54084	0.000976326	0.00300153	-2.2201	yjjJ	toxin YjjJ
b0730	0.39963	4.65506	4.53681	0.000982552	0.00301853	-1.81536	mngR	DNA-binding transcriptional repressor MngR
b2594	-0.241598	7.74663	-4.53038	0.000992581	0.00304719	-2.36596	rluD	23S rRNA pseudouridine(1911/1915/1917) synthase
b0777	-0.597421	4.1478	-4.52418	0.00100237	0.00307432	-1.70553	bioC	malonyl-acyl carrier protein methyltransferase
b1622	0.354208	5.07412	4.5235	0.00100344	0.00307432	-1.93754	malY	negative regulator of MalT activity/cystathionine beta-lyase
b2305	-0.765743	2.65631	-4.52301	0.00100422	0.00307432	-1.31924	rpnB	recombination-promoting nuclease RpnB
b4555	-1.62421	0.318347	-4.52299	0.00100425	0.00307432	-0.722094	yicS	uncharacterized protein YicS
b1554	-0.962344	2.03947	-4.52244	0.00100512	0.00307483	-1.14984	rrrQ	Qin prophage%3B putative lysozyme
b0016	0.52337	3.75463	4.52132	0.00100691	0.00307813	-1.61509	insL-1	IS186/IS421 transposase
b1832	-0.284058	6.99244	-4.51501	0.00101701	0.00310681	-2.31463	msrC	free methionine-(R)-sulfoxide reductase
b2307	-0.491701	3.71721	-4.51255	0.00102097	0.00311672	-1.61771	hisM	lysine/arginine/ornithine ABC transporter/histidine ABC transporter%2C membrane subunit HisM
b3327	-1.02918	1.35005	-4.51066	0.00102403	0.00312386	-0.987644	gspF	Type II secretion system protein GspF
b1212	-0.280658	6.68355	-4.50986	0.00102533	0.00312563	-2.28068	prmC	protein-(glutamine-N(5)) methyltransferase
b0925	0.279589	6.27074	4.50677	0.00103036	0.00313877	-2.22005	ldtD	L%2CD-transpeptidase LdtD
b1464	0.332425	5.32476	4.50341	0.00103585	0.00315298	-2.02974	yddE	PF02567 family protein YddE
b0410	0.297512	5.97356	4.50303	0.00103648	0.00315298	-2.17093	yajD	HNH nuclease family protein
b0121	-0.262704	8.03307	-4.50043	0.00104076	0.00316379	-2.43576	speE	spermidine synthase
b4637	0.45252	6.09851	4.49942	0.00104243	0.00316665	-2.19946	uof	RyhB-regulated fur leader peptide
b4680	0.981668	2.70138	4.49895	0.0010432	0.00316677	-1.36956	ypdK	putative membrane protein YpdK
b4310	-0.90132	1.81245	-4.49215	0.00105451	0.00319888	-1.14055	nanM	N-acetylneuraminate mutarotase
b2071	-1.48967	0.225963	-4.49046	0.00105733	0.00320521	-0.759903	yegJ	DUF2314 domain-containing protein YegJ
b1287	-0.423253	4.98407	-4.48789	0.00106165	0.00321605	-1.9727	yciW	putative oxidoreductase
b1033	0.431164	4.36301	4.47794	0.00107855	0.00326468	-1.84206	ghrA	glyoxylate/hydroxypyruvate reductase A
b1089	-0.212961	11.1063	-4.47756	0.00107921	0.00326468	-2.57256	rpmF	50S ribosomal subunit protein L32
b1810	-0.709892	3.59423	-4.47125	0.00109007	0.00329524	-1.64867	yoaC	DUF1889 domain-containing protein YoaC
b3289	-0.217834	7.9797	-4.45866	0.00111211	0.00335952	-2.50245	rsmB	16S rRNA m(5)C967 methyltransferase
b4724	-0.374545	5.67767	-4.45721	0.00111466	0.00336491	-2.18304	ynfQ	Qin prophage%3B protein YnfQ
b0918	0.277251	6.8697	4.45172	0.00112444	0.00339205	-2.40557	kdsB	3-deoxy-manno-octulosonate cytidylyltransferase
b3970	-1.47672	-0.00847439	-4.44697	0.00113297	0.00341542	-0.787444	rrlB	23S ribosomal RNA
b3500	0.23425	7.94607	4.44302	0.00114012	0.00343459	-2.52682	gor	glutathione reductase (NADPH)
b4675	-0.874939	1.97046	-4.43842	0.00114851	0.00345748	-1.27184	yoaJ	uncharacterized protein YoaJ
b2765	0.31136	6.73613	4.43777	0.00114969	0.00345863	-2.41016	queD	6-carboxy-5%2C6%2C7%2C8-tetrahydropterin synthase
b1984	-1.32295	0.859129	-4.43733	0.0011505	0.00345867	-0.979581	asnW	tRNA-Asn
b0426	0.217048	7.85853	4.43645	0.00115212	0.00346114	-2.53199	yajQ	nucleotide binding protein
b1968	-0.616534	4.11372	-4.4324	0.00115958	0.00348113	-1.84805	hprS	sensory histidine kinase HprS
b2547	-1.34901	0.413972	-4.42816	0.00116744	0.00350232	-0.900774	yphE	putative ABC transporter ATP-binding protein YphE
b0695	0.387382	5.27013	4.42523	0.0011729	0.00351627	-2.14725	kdpD	sensory histidine kinase KdpD
b0139	-0.964557	1.85993	-4.42033	0.0011821	0.00354142	-1.2681	htrE	putative fimbrial usher protein HtrE
b2669	-0.62714	3.80762	-4.41492	0.00119236	0.003567	-1.79986	stpA	DNA-binding transcriptional repressor StpA with RNA chaperone activity
b3258	-0.250291	6.79676	-4.41463	0.00119291	0.003567	-2.4568	panF	pantothenate:Na(+) symporter
b3366	-0.958897	1.61131	-4.41453	0.0011931	0.003567	-1.21575	nirD	nitrite reductase subunit NirD
b4349	-0.242393	7.23281	-4.41267	0.00119665	0.00357513	-2.51498	hsdM	type I restriction enzyme EcoKI methyltransferase component
b3884	0.332336	5.20716	4.39932	0.00122245	0.00364969	-2.17674	yihW	putative DNA-binding transcriptional regulator YihW
b4234	-0.222773	7.94664	-4.39746	0.00122608	0.00365804	-2.60302	yjgA	DUF615 domain-containing protein YjgA
b1218	0.463456	4.06887	4.39426	0.00123237	0.00367426	-1.90793	chaC	glutathione-specific gamma-glutamylcyclotransferase
b3660	-0.448217	4.0672	-4.39172	0.0012374	0.00368673	-1.90929	yicL	putative inner membrane protein
b3704	-0.221416	9.97526	-4.38811	0.00124456	0.00370553	-2.69533	rnpA	RNase P protein component
b1383	-0.48481	3.80699	-4.37684	0.0012672	0.00377035	-1.86721	ydbL	DUF1318 domain-containing protein YdbL
b4253	-0.782881	3.17702	-4.37148	0.00127814	0.0038003	-1.70528	yjgL	protein YjgL
b0568	-0.381928	5.3864	-4.3683	0.00128465	0.00381706	-2.26777	nfrA	bacteriophage N4 receptor%2C outer membrane protein
b2575	-0.314602	5.86559	-4.36787	0.00128554	0.00381708	-2.37373	yfiC	tRNA m(6)A37 methyltransferase
b1879	-0.742552	2.41937	-4.36647	0.00128843	0.00382013	-1.5169	flhA	flagellar biosynthesis protein FlhA
b0985	-1.23167	0.739487	-4.36622	0.00128894	0.00382013	-1.07601	gfcC	capsule biosynthesis GfcC family protein
b2081	-0.226813	8.10878	-4.3661	0.00128921	0.00382013	-2.66606	yegQ	putative peptidase YegQ
b3916	0.230175	8.78565	4.36365	0.00129428	0.00382879	-2.7028	pfkA	6-phosphofructokinase I
b3397	0.238311	7.54553	4.36357	0.00129445	0.00382879	-2.62968	nudE	ADP-sugar diphosphatase NudE
b1942	-1.997	-0.709648	-4.36336	0.00129488	0.00382879	-0.799681	fliJ	flagellar biosynthesis protein FliJ
b3172	-0.276997	6.82526	-4.36298	0.00129566	0.00382879	-2.54752	argG	argininosuccinate synthetase
b2416	0.208019	11.877	4.35455	0.00131329	0.00387827	-2.79696	ptsI	PTS enzyme I
b1497	-1.47296	-0.0080597	-4.35243	0.00131777	0.00388885	-0.94002	ydeM	putative anaerobic sulfatase maturation enzyme YdeM
b3818	-1.07223	1.05431	-4.34831	0.00132652	0.00391202	-1.18179	yigG	inner membrane protein
b1115	1.61538	0.751051	4.34339	0.00133703	0.00394035	-1.10918	ycfT	inner membrane protein YcfT
b0830	0.435826	4.3755	4.34273	0.00133846	0.00394189	-2.07182	gsiB	glutathione ABC transporter periplasmic binding protein
b2076	0.371779	4.82465	4.33872	0.00134711	0.00396468	-2.18783	mdtC	multidrug efflux pump RND permease subunit MdtC
b2681	0.440642	3.96807	4.33626	0.00135243	0.00397762	-1.98032	ygaY	putative transporter YgaY%2C N-terminal fragment
b1577	-1.11834	0.803994	-4.33432	0.00135665	0.00398734	-1.14589	ydfE	Qin prophage%3B protein YdfE
b3627	-0.376522	6.15368	-4.33378	0.00135783	0.0039881	-2.48622	waaO	UDP-D-glucose:(glucosyl)LPS alpha-1%2C3-glucosyltransferase
b2557	0.262528	6.81022	4.32646	0.00137391	0.0040326	-2.60814	purL	phosphoribosylformylglycinamide synthetase
b4116	-1.10945	0.876373	-4.32413	0.00137907	0.00404503	-1.17902	adiY	DNA-binding transcriptional activator AdiY
b1555	-1.04535	2.04568	-4.3192	0.00139006	0.0040745	-1.48631	ydfR	Qin prophage%3B protein YdfR
b3775	-0.262097	6.17464	-4.31835	0.00139195	0.00407729	-2.51782	ppiC	peptidyl-prolyl cis-trans isomerase C
b4642	-1.15026	0.918368	-4.31521	0.00139901	0.00409523	-1.20313
b3989	-0.714073	3.35485	-4.31143	0.00140754	0.0041174	-1.85456	yjaZ	conserved protein YjaZ
b3535	-0.791523	3.74072	-4.30796	0.00141543	0.00413769	-1.95752	yhjR	PF10945 family protein YhjR
b1913	-0.232642	7.5406	-4.30122	0.00143089	0.00418009	-2.73379	uvrC	excision nuclease subunit C
b1407	-0.744962	2.36029	-4.2996	0.00143464	0.00418821	-1.61374	ydbD	DUF2773 domain-containing protein YdbD
b4381	0.23615	6.72786	4.29413	0.00144733	0.00422244	-2.65141	deoC	deoxyribose-phosphate aldolase
b0498	-1.26437	0.603171	-4.29307	0.00144981	0.00422682	-1.16412	ybbC	PF15631 family protein YbbC
b1900	0.92767	1.52726	4.28994	0.00145716	0.00424541	-1.40783	araG	arabinose ABC transporter ATP binding subunit
b4122	-0.652803	2.80067	-4.2875	0.00146291	0.0042593	-1.75335	fumB	fumarase B
b1234	-0.30958	5.82699	-4.28618	0.00146601	0.00426546	-2.50356	rssA	putative patatin-like phospholipase RssA
b0393	0.282999	7.29129	4.28306	0.00147343	0.00428418	-2.74094	rdgC	nucleoid-associated protein RdgC
b2760	-1.66156	0.286987	-4.27458	0.00149373	0.00433757	-1.11553	casA	type I-E CRISPR system Cascade subunit CasA
b3644	0.236917	8.24714	4.27456	0.00149379	0.00433757	-2.82927	yicC	UPF0701 family protein YicC
b3939	0.289048	5.71866	4.27371	0.00149583	0.00434061	-2.50414	metB	O-succinylhomoserine(thiol)-lyase/O-succinylhomoserine lyase
b2786	-0.244784	6.56117	-4.27251	0.00149874	0.00434615	-2.66157	barA	sensory histidine kinase BarA
b0546	-0.690449	2.81107	-4.2662	0.0015141	0.00438776	-1.78978	ybcM	DLP12 prophage%3B putative DNA-binding transcriptional regulator
b3560	0.250843	8.43852	4.26447	0.00151833	0.00439708	-2.85606	glyQ	glycine--tRNA ligase subunit alpha
b3789	0.237248	7.41703	4.26111	0.00152661	0.00441812	-2.791	rffH	dTDP-glucose pyrophosphorylase 2
b1014	0.215959	8.13989	4.26051	0.00152809	0.00441944	-2.847	putA	fused DNA-binding transcriptional repressor/proline dehydrogenase/1-pyrroline-5-carboxylate dehydrogenase PutA
b3805	0.2406	7.42115	4.25941	0.0015308	0.00442435	-2.79427	hemC	hydroxymethylbilane synthase
b0344	0.568235	3.17911	4.25603	0.00153919	0.00444377	-1.91101	lacZ	beta-galactosidase
b4752	-1.07058	1.14096	-4.25588	0.00153957	0.00444377	-1.35563	yecU	protein YecU
b0456	-0.342585	6.39104	-4.25298	0.00154682	0.00446174	-2.66586	ybaA	DUF1428 domain-containing protein YbaA
b4352	-0.372027	5.44502	-4.2515	0.00155052	0.00446946	-2.47835	yjiA	P-loop guanosine triphosphatase
b2428	-0.482074	4.01261	-4.24742	0.00156079	0.00449608	-2.13763	murQ	N-acetylmuramic acid 6-phosphate etherase
b1726	-0.463174	5.15698	-4.2466	0.00156286	0.00449906	-2.4187	yniB	uncharacterized protein YniB
b1897	0.797969	1.81131	4.24009	0.00157943	0.00454373	-1.56936	otsB	trehalose-6-phosphate phosphatase
b2364	-0.553341	3.14384	-4.23966	0.00158053	0.00454389	-1.92621	dsdC	DNA-binding transcriptional dual regulator DsdC
b4167	0.354565	5.73106	4.23335	0.00159677	0.00458755	-2.57469	nnr	NAD(P)HX epimerase/NAD(P)HX dehydratase
b1618	-0.312643	5.40542	-4.23018	0.001605	0.00460815	-2.50661	uidR	DNA-binding transcriptional repressor UidR
b3572	-0.239636	7.69	-4.2291	0.00160781	0.00461043	-2.86876	avtA	valine--pyruvate aminotransferase
b2009	0.532787	3.51104	4.22906	0.00160792	0.00461043	-2.04302	sbmC	DNA gyrase inhibitor
b4282	-0.993746	1.18065	-4.22845	0.00160949	0.00461189	-1.41397	yjhE	KpLE2 phage-like element%3B putative membrane protein (pseudogene)
b0720	-0.389284	7.41404	-4.22623	0.00161531	0.00462551	-2.84772	gltA	citrate synthase
b2621	0.182278	13.5976	4.22074	0.00162974	0.00466233	-3.05901	ssrA	tmRNA
b3700	-0.221562	7.20003	-4.22053	0.00163031	0.00466233	-2.83644	recF	DNA repair protein RecF
b0875	0.553863	3.02279	4.21741	0.00163859	0.00468292	-1.93614	aqpZ	water channel AqpZ
b1748	0.910053	1.78433	4.2166	0.00164074	0.00468597	-1.59699	astC	succinylornithine transaminase
b1093	-0.192374	10.2719	-4.21394	0.00164784	0.00470316	-2.99759	fabG	3-oxoacyl-[acyl-carrier-protein] reductase FabG
b3382	-0.711811	2.18449	-4.21081	0.00165623	0.004724	-1.71609	yhfY	conserved protein YhfY
b0421	0.224772	7.25394	4.20831	0.00166297	0.00474011	-2.86401	ispA	geranyl diphosphate/farnesyl diphosphate synthase
b2699	0.215317	9.70263	4.20287	0.00167772	0.00477903	-3.00226	recA	DNA recombination/repair protein RecA
b4401	0.208341	9.2966	4.19871	0.00168911	0.00480832	-2.99856	arcA	DNA-binding transcriptional dual regulator ArcA
b2704	1.18518	0.59651	4.19714	0.00169341	0.0048174	-1.32956	srlB	sorbitol-specific PTS enzyme IIA component
b2429	-0.464232	3.93804	-4.19042	0.00171202	0.00486714	-2.21625	murP	N-acetylmuramic acid-specific PTS enzyme IICB component/anhydro-N-acetylmuramic acid transporter
b0833	-0.562902	3.65166	-4.18786	0.00171916	0.00488425	-2.1448	pdeI	putative c-di-GMP phosphodiesterase PdeI
b0569	-0.380432	4.81047	-4.17768	0.00174788	0.00496262	-2.45539	nfrB	bacteriophage N4 receptor%2C inner membrane subunit
b3083	-0.534968	3.54819	-4.17307	0.00176104	0.0049967	-2.1438	higB	ribosome-dependent mRNA interferase toxin HigB
b2147	-0.805135	2.11067	-4.16714	0.00177815	0.00504197	-1.76559	preA	NAD-dependent dihydropyrimidine dehydrogenase subunit PreA
b0250	0.472894	3.75729	4.16592	0.00178168	0.00504866	-2.21437	ykfB	CP4-6 prophage%3B protein YkfB
b1276	-0.302761	5.55935	-4.16283	0.00179068	0.00507086	-2.65613	acnA	aconitate hydratase 1
b0603	-0.702668	2.20832	-4.16233	0.00179214	0.00507171	-1.80482	ybdO	putative LysR family DNA-binding transcriptional regulator YbdO
b0536	-0.566561	3.6128	-4.16028	0.00179813	0.00508533	-2.18133	argU	tRNA-Arg
b2565	-0.25282	7.26392	-4.1583	0.00180394	0.00509845	-2.94932	recO	DNA repair protein RecO
b2859	-1.19419	1.06837	-4.15375	0.00181737	0.00513307	-1.50202	ygeO	putative uncharacterized protein YgeO
b1533	-0.39624	4.5208	-4.15295	0.00181976	0.00513368	-2.42683	eamA	cysteine/O-acetylserine exporter EamA
b0050	-0.230893	6.66576	-4.15277	0.00182029	0.00513368	-2.88161	apaG	DUF525 domain-containing protein ApaG
b3944	1.0104	1.35657	4.15249	0.00182113	0.00513368	-1.59155	yijF	conserved protein YijF
b2843	-0.668677	3.13728	-4.14713	0.0018371	0.00517534	-2.07751	kduI	5-dehydro-4-deoxy-D-glucuronate isomerase
b0713	0.333292	5.2104	4.14172	0.00185342	0.00521792	-2.61381	pxpA	5-oxoprolinase component A
b1959	-0.398476	4.60015	-4.12882	0.00189289	0.0053256	-2.48765	yedA	putative transporter YedA
b2213	-0.336675	5.6484	-4.12474	0.00190554	0.00535773	-2.74044	ada	DNA-binding transcriptional dual regulator/DNA repair protein Ada
b1086	-0.202589	8.15065	-4.12344	0.00190961	0.00536568	-3.08095	rluC	23S rRNA pseudouridine(955/2504/2580) synthase
b0304	-1.96163	-0.851811	-4.11826	0.00192584	0.00540778	-1.17245	rclA	putative pyridine nucleotide-disulfide oxidoreductase RclA
b1644	-0.379937	4.51464	-4.11249	0.00194412	0.00545525	-2.49482	ydhJ	putative membrane fusion protein YdhJ
b1415	0.32851	6.39137	4.11213	0.00194525	0.00545525	-2.90809	aldA	aldehyde dehydrogenase A
b1242	-0.322253	5.13044	-4.11083	0.0019494	0.00546335	-2.64627	ychE	putative inner membrane protein
b1176	0.219016	7.47871	4.11013	0.00195163	0.00546608	-3.05455	minC	Z-ring positioning protein MinC
b0535	-1.18099	0.410287	-4.10933	0.00195418	0.00546969	-1.4298	fimZ	putative LuxR family transcriptional regulator FimZ
b0958	-0.290309	5.90773	-4.1086	0.00195653	0.00547273	-2.82313	sulA	cell division inhibitor SulA
b4266	-1.08076	0.764034	-4.10728	0.00196076	0.00548104	-1.51412	idnO	5-keto-D-gluconate 5-reductase
b4201	-0.202389	11.6958	-4.10508	0.00196784	0.0054973	-3.21728	priB	primosomal replication protein N
b1706	-0.22044	7.2793	-4.10406	0.00197111	0.0055029	-3.04402	ydiU	UPF0061 family protein YdiU
b3925	0.260611	6.23226	4.10049	0.00198269	0.00553167	-2.90066	glpX	fructose-1%2C6-bisphosphatase 2
b2804	0.495881	3.48524	4.09942	0.00198617	0.00553781	-2.25734	fucU	L-fucose mutarotase
b3838	0.221198	7.5755	4.09801	0.00199076	0.00554704	-3.08397	tatB	twin arginine protein translocation system - TatB protein
b3165	-0.198899	11.4304	-4.09523	0.00199983	0.00556875	-3.22809	rpsO	30S ribosomal subunit protein S15
b2327	-0.261672	6.39615	-4.08913	0.00201992	0.00562111	-2.94722	yfcA	conserved inner membrane protein YfcA
b3368	0.242896	6.59109	4.08154	0.00204524	0.00568777	-2.99324	cysG	siroheme synthase
b3121	-1.27178	0.128897	-4.08116	0.0020465	0.00568777	-1.41596	yhaC	uncharacterized protein YhaC
b3144	-0.483497	3.42344	-4.07823	0.00205637	0.00571155	-2.27463	yraJ	putative fimbrial usher protein YraJ
b3324	-1.22843	0.437022	-4.06746	0.00209304	0.00580968	-1.50481	gspC	Type II secretion system protein GspC
b3960	0.316596	5.4171	4.06512	0.00210108	0.0058283	-2.79295	argH	argininosuccinate lyase
b0962	0.25897	6.26572	4.06324	0.00210758	0.00584258	-2.97047	helD	DNA helicase IV
b4115	-0.871548	1.749	-4.05403	0.00213975	0.00592798	-1.85733	adiC	arginine:agmatine antiporter
b0677	-0.204805	7.65072	-4.05288	0.00214379	0.00593539	-3.16714	nagA	N-acetylglucosamine-6-phosphate deacetylase
b3050	-0.697931	2.84789	-4.05143	0.00214889	0.00594572	-2.1637	yqiJ	putative inner membrane protein
b4109	-0.525677	3.129	-4.04578	0.00216896	0.0059957	-2.25294	crfC	clamp-binding sister replication fork colocalization protein
b3625	-0.456223	5.59805	-4.04557	0.00216971	0.0059957	-2.86246	waaY	lipopolysaccharide core heptose (II) kinase
b2750	1.24075	1.37962	4.04082	0.00218673	0.00603887	-1.77764	cysC	adenylyl-sulfate kinase
b2136	-0.402543	4.36167	-4.04001	0.00218966	0.00604312	-2.58109	yohD	DedA family protein YohD
b1522	-0.345531	4.70166	-4.03733	0.00219932	0.00606594	-2.66965	dgcF	putative diguanylate cyclase DgcF
b2816	-0.349694	7.46826	-4.03298	0.00221512	0.00610565	-3.18413	metV	tRNA-Met
b1833	-0.303012	5.20685	-4.03043	0.00222446	0.00612749	-2.80227	yebS	intermembrane transport protein YebS
b3956	0.24719	8.19501	4.02696	0.0022372	0.00615868	-3.24953	ppc	phosphoenolpyruvate carboxylase
b0049	-0.301541	6.17189	-4.02524	0.00224355	0.00616891	-3.01699	apaH	diadenosine tetraphosphatase
b1453	-0.339266	4.71251	-4.02518	0.00224376	0.00616891	-2.69319	ansP	L-asparagine transporter
b0986	-1.29187	0.368531	-4.02012	0.00226256	0.00621667	-1.56483	gfcB	lipoprotein GfcB
b3982	-0.211319	9.93519	-4.0196	0.00226448	0.00621803	-3.32213	nusG	transcription termination factor NusG
b3198	0.207906	7.33317	4.01828	0.00226942	0.00622765	-3.19802	kdsC	3-deoxy-D-manno-octulosonate 8-phosphate phosphatase KdsC
b0269	0.70761	3.64786	4.0171	0.00227384	0.00623583	-2.43621	yagF	CP4-6 prophage%3B D-xylonate dehydratase
b2079	0.371946	4.5592	4.01106	0.00229659	0.00629424	-2.68196	baeR	DNA-binding transcriptional activator BaeR
b2509	-0.214772	8.06026	-4.00965	0.00230195	0.00630495	-3.27088	xseA	exodeoxyribonuclease VII subunit XseA
b3548	-0.740829	2.41986	-4.00849	0.00230635	0.00631304	-2.12089	yhjY	conserved protein YhjY
b1489	-0.633374	2.78156	-4.00272	0.00232844	0.00636947	-2.23277	dosP	oxygen-sensing c-di-GMP phosphodiesterase DosP
b1434	-0.547822	3.02841	-4.0013	0.00233388	0.00638035	-2.30207	sutR	DNA-binding transcriptional dual regulator SutR
b3943	-0.36805	4.55533	-3.99625	0.00235343	0.00642975	-2.70458	yijE	cystine exporter
b0858	0.538941	3.62779	3.99366	0.0023635	0.00645321	-2.47462	ybjO	putative inner membrane protein
b1498	-0.832814	1.46908	-3.98673	0.00239071	0.0065234	-1.90048	ydeN	putative sulfatase
b0396	-0.391031	4.3943	-3.98626	0.00239259	0.00652442	-2.68146	araJ	putative transport protein AraJ
b0857	-0.719412	2.16459	-3.9833	0.0024043	0.00655224	-2.09767	potI	putrescine ABC transporter membrane subunit PotI
b0844	0.332475	5.34468	3.98126	0.00241242	0.00657027	-2.92053	ybjI	5-amino-6-(5-phospho-D-ribitylamino)uracil phosphatase
b4035	0.871571	2.36041	3.97615	0.00243287	0.00662179	-2.16424	malK	maltose ABC transporter ATP binding subunit
b1250	-0.412839	4.41115	-3.97548	0.0024356	0.00662506	-2.70375	kch	K(+) channel Kch
b3703	-0.216567	9.58467	-3.97471	0.00243869	0.00662933	-3.39059	rpmH	50S ribosomal subunit protein L34
b0185	-0.183813	9.10498	-3.97116	0.00245303	0.00666413	-3.38329	accA	acetyl-CoA carboxyltransferase subunit alpha
b1263	-0.528864	3.10226	-3.96768	0.00246721	0.00669848	-2.37989	trpD	anthranilate synthase subunit TrpD
b4711	-1.3362	0.361829	-3.96625	0.00247305	0.00671014	-1.65515	insH21	IS5 transposase and trans-activator
b2812	-0.276617	5.9155	-3.96478	0.00247908	0.0067223	-3.072	tcdA	tRNA threonylcarbamoyladenosine dehydratase
b3023	-0.496205	3.47063	-3.96262	0.00248795	0.00674215	-2.48492	ygiV	DNA-binding transcriptional repressor YgiV
b3817	-1.05868	1.96722	-3.9617	0.00249176	0.00674825	-2.06517	yigF	DUF2628 domain-containing protein YigF
b0763	0.4172	5.6161	3.95843	0.00250525	0.00677652	-3.02028	modA	molybdate ABC transporter periplasmic binding protein
b3921	-0.412329	4.12135	-3.95794	0.00250731	0.00677652	-2.66149	yiiR	DUF805 domain-containing protein YiiR
b2230	-0.441859	4.3299	-3.95777	0.00250802	0.00677652	-2.71388	yfaA	DUF2138 domain-containing protein YfaA
b2273	-1.48912	-0.453073	-3.95752	0.00250904	0.00677652	-1.50789	yfbN	uncharacterized protein YfbN
b0787	-1.06049	1.64981	-3.95729	0.00250999	0.00677652	-1.98628	ybhM	Bax1-I family protein YbhM
b1994	-0.571474	2.96672	-3.94668	0.00255451	0.00689241	-2.37953	insH-6	CP4-44 prophage%3B IS5 transposase and trans-activator
b1865	-0.202928	7.34925	-3.94437	0.0025643	0.00691454	-3.32647	nudB	dihydroneopterin triphosphate diphosphatase
b4557	-0.207845	9.02858	-3.94269	0.00257146	0.00692776	-3.43011	yidD	membrane protein insertion efficiency factor
b1542	-0.832212	1.85664	-3.94247	0.00257239	0.00692776	-2.07788	ydfI	putative oxidoreductase YdfI
b0506	0.270003	5.79944	3.93396	0.00260895	0.00702187	-3.10339	allR	DNA-binding transcriptional repressor AllR
b4661	-0.495345	3.29076	-3.93341	0.00261132	0.00702389	-2.48876	yfcU	putative outer membrane usher protein YfcU
b2708	0.303888	5.15557	3.93243	0.00261559	0.00703102	-2.9608	gutQ	D-arabinose 5-phosphate isomerase GutQ
b4033	0.6079	3.43484	3.92977	0.00262715	0.00705773	-2.53391	malF	maltose ABC transporter membrane subunit MalF
b2734	-0.903832	1.79746	-3.92778	0.00263584	0.00707669	-2.08358	pphB	phosphoprotein phosphatase 2
b4400	-0.505202	3.49281	-3.92279	0.00265773	0.00713106	-2.55913	creD	putative inner membrane protein
b1272	0.218724	6.78557	3.91523	0.00269134	0.00721679	-3.30878	sohB	S49 peptidase family protein
b0913	-0.370621	4.36006	-3.91085	0.00271097	0.00726121	-2.80347	ycaI	conserved inner membrane protein YcaI
b0427	-0.219919	6.67511	-3.91079	0.00271125	0.00726121	-3.29939	yajR	putative major facilitator superfamily transport protein YajR
b3804	0.247184	6.1829	3.91023	0.00271378	0.0072635	-3.2197	hemD	uroporphyrinogen-III synthase
b3937	-0.300464	5.43272	-3.909	0.00271934	0.00727389	-3.06389	yiiX	putative lipid binding hydrolase
b3830	0.490126	3.38763	3.90762	0.00272557	0.00728607	-2.56117	ysgA	putative dienelactone hydrolase
b1657	-0.315267	5.20367	-3.90448	0.00273985	0.00731974	-3.01876	ydhP	putative transporter YdhP
b1232	-0.273155	6.81562	-3.90259	0.00274844	0.00733817	-3.33345	purU	formyltetrahydrofolate deformylase
b0355	-0.24068	6.07551	-3.90182	0.00275198	0.00734155	-3.21281	frmB	S-formylglutathione hydrolase FrmB
b1629	-0.203138	8.0431	-3.90158	0.00275308	0.00734155	-3.45661	rsxC	SoxR [2Fe-2S] reducing system protein RsxC
b0067	-0.298594	5.43456	-3.89773	0.00277075	0.00738414	-3.084	thiP	thiamine ABC transporter membrane subunit
b2916	0.3707	6.15648	3.8969	0.00277458	0.00738982	-3.23669	argP	DNA-binding transcriptional dual regulator ArgP
b0807	-0.284312	6.37523	-3.892	0.00279726	0.00744566	-3.28333	rlmF	23S rRNA m(6)A1618 methyltransferase
b2684	0.196471	7.51376	3.88968	0.00280811	0.00746996	-3.43784	mprA	DNA-binding transcriptional repressor MprA
b3522	0.461815	3.40759	3.88835	0.0028143	0.00748183	-2.6002	yhjD	putative transporter YhjD
b0209	0.270273	5.6263	3.88568	0.00282684	0.00751057	-3.14979	yafD	endonuclease/exonuclease/phosphatase domain-containing protein YafD
b0543	-0.578591	3.90687	-3.88263	0.00284126	0.00754427	-2.73267	emrE	multidrug/betaine/choline efflux transporter EmrE
b2367	-1.04738	0.694172	-3.87768	0.00286477	0.00760204	-1.88661	emrY	tripartite efflux pump membrane subunit EmrY
b2102	-0.575438	3.36641	-3.87569	0.00287428	0.00762264	-2.60536	yegX	putative hydrolase
b3244	0.208439	7.88019	3.87419	0.00288143	0.00763694	-3.49382	tldD	metalloprotease TldD
b1762	-0.636929	3.63886	-3.87254	0.00288939	0.00765335	-2.67965	ynjI	DUF1266 domain-containing protein YnjI
b0940	-0.615607	2.3555	-3.87037	0.00289986	0.00767642	-2.34575	elfC	putative fimbrial usher protein ElfC
b1179	0.310998	5.35495	3.85943	0.00295323	0.00781292	-3.13375	ycgL	PF05166 family protein YcgL
b4110	-0.915789	1.05007	-3.85651	0.00296765	0.00784631	-2.01205	yjcZ	uncharacterized protein YjcZ
b1967	0.498563	3.06017	3.85017	0.00299917	0.00792054	-2.57518	hchA	protein/nucleic acid deglycase 1
b3259	-0.196599	7.45528	-3.84997	0.00300021	0.00792054	-3.50048	prmA	methyltransferase for 50S ribosomal subunit protein L11
b2796	-0.256707	10.3589	-3.84977	0.0030012	0.00792054	-3.62639	sdaC	serine:H(+) symporter SdaC
b4172	0.257772	9.02448	3.84771	0.00301154	0.007943	-3.59474	hfq	RNA-binding protein Hfq
b1787	-0.295556	5.17898	-3.84716	0.00301428	0.00794541	-3.11254	yeaK	mischarged aminoacyl-tRNA deacylase
b3238	-0.226756	6.75514	-3.84458	0.00302728	0.00797484	-3.42584	yhcN	DUF1471 domain-containing stress-induced protein YhcN
b3491	-0.819085	1.41175	-3.84385	0.00303098	0.00797974	-2.12935	yhiM	inner membrane protein with a role in acid resistance
b0471	0.225391	8.17595	3.84017	0.00304966	0.00802389	-3.57158	ybaB	putative nucleoid-associated protein YbaB
b0036	1.61748	0.0595427	3.83982	0.00305144	0.00802389	-1.79791	caiD	crotonobetainyl-CoA hydratase
b3437	-0.340404	5.21508	-3.83847	0.00305836	0.00803297	-3.13532	gntK	D-gluconate kinase%2C thermostable
b4742	-0.72321	1.91298	-3.83842	0.00305859	0.00803297	-2.27737	ymjE	protein YmjE
b2131	0.517169	3.31031	3.83607	0.00307064	0.00805972	-2.66439	osmF	glycine betaine ABC transporter periplasmic binding protein OsmF
b0119	0.256432	5.69264	3.83464	0.00307796	0.00807406	-3.25266	yacL	UPF0231 family protein YacL
b3786	0.190637	7.96425	3.83423	0.00308009	0.00807477	-3.56888	wecB	UDP-N-acetylglucosamine 2-epimerase
b2779	0.189183	11.7722	3.83316	0.00308556	0.00808423	-3.68859	eno	enolase
b0923	0.212274	6.72594	3.83272	0.00308785	0.00808536	-3.44342	mukE	chromosome partitioning protein MukE
b3702	-0.199923	9.0175	-3.83188	0.0030922	0.00809187	-3.62191	dnaA	chromosomal replication initiator protein DnaA
b3071	0.335357	4.60187	3.83101	0.00309671	0.00809879	-3.00387	nfeR	DNA-binding transcriptional repressor NfeR
b0312	-0.230451	6.85021	-3.82827	0.00311089	0.00813099	-3.46757	betB	betaine aldehyde dehydrogenase
b0760	0.235322	6.15852	3.82553	0.00312516	0.00816337	-3.36214	modF	ABC family protein ModF
b0955	0.181273	8.70601	3.82272	0.00313987	0.00819686	-3.62718	ycbZ	putative ATP-dependent protease YcbZ
b0647	-1.62086	-0.951751	-3.82225	0.00314234	0.0081984	-1.65084	ybeT	Sel1 repeat-containing protein YbeT
b1737	-0.750425	3.05045	-3.81941	0.00315732	0.00822837	-2.61552	chbC	N%2CN'-diacetylchitobiose-specific PTS enzyme IIC component
b3295	-0.168642	13.4669	-3.81935	0.00315762	0.00822837	-3.74774	rpoA	RNA polymerase subunit alpha
b1886	-1.13411	0.285091	-3.8159	0.00317591	0.00827108	-1.89651	tar	methyl-accepting chemotaxis protein Tar
b0992	-1.03426	0.955177	-3.81211	0.00319609	0.00831864	-2.06125	yccM	putative 4Fe-4S membrane protein
b0636	0.226591	7.98574	3.8109	0.00320257	0.00832732	-3.6108	rlmH	23S rRNA m(3)psi1915 methyltransferase
b4618	0.431568	3.80172	3.81077	0.00320326	0.00832732	-2.83677	tisB	membrane-depolarizing toxin TisB
b2784	0.235932	6.87395	3.81029	0.00320586	0.00832911	-3.5031	relA	GDP/GTP pyrophosphokinase
b3630	-0.366894	6.14635	-3.80487	0.00323507	0.00839997	-3.39244	waaP	lipopolysaccharide core heptose (I) kinase
b1841	-0.293697	6.12934	-3.80175	0.00325198	0.00843662	-3.39583	yobA	CopC domain-containing protein
b3406	0.311976	4.88072	3.80155	0.00325307	0.00843662	-3.1224	greB	transcription elongation factor GreB
b0251	0.65402	2.11614	3.80093	0.00325644	0.00843883	-2.40346	yafY	CP4-6 prophage%3B inner membrane lipoprotein YafY
b3058	-0.349508	4.40854	-3.80068	0.00325781	0.00843883	-3.00697	folB	dihydroneopterin aldolase
b3631	-0.234932	6.90682	-3.80014	0.00326078	0.00844148	-3.52399	waaG	lipopolysaccharide glucosyltransferase I
b3467	0.564886	3.33591	3.79794	0.00327283	0.00846462	-2.73673	yhhM	DUF2500 domain-containing protein YhhM
b3595	-0.501946	3.39252	-3.79779	0.00327361	0.00846462	-2.74913	yibJ	putative RHS domain-containing protein YibJ
b1826	0.372324	5.03513	3.79584	0.00328432	0.00848725	-3.16871	mgrB	PhoQ kinase inhibitor
b0261	0.392887	4.10809	3.79321	0.00329881	0.00851965	-2.94623	mmuM	homocysteine S-methyltransferase
b2504	0.287453	5.89434	3.78443	0.0033477	0.00864078	-3.38198	yfgG	protein YfgG
b1665	-0.404543	4.95276	-3.77619	0.0033943	0.00875585	-3.18101	valV	tRNA-Val
b2237	0.278708	5.96899	3.7741	0.0034062	0.00878132	-3.41518	inaA	putative lipopolysaccharide kinase InaA
b1562	0.399585	4.02142	3.77103	0.00342381	0.00882008	-2.96263	hokD	Qin prophage%3B toxic protein HokD
b3832	-0.244468	6.40839	-3.77077	0.00342529	0.00882008	-3.50001	rmuC	putative recombination limiting protein RmuC
b2267	-0.444734	3.67584	-3.76546	0.00345595	0.00889376	-2.87995	elaA	putative N-acetyltransferase ElaA
b4651	-1.30378	-0.258	-3.7609	0.00348248	0.00895672	-1.8751
b0542	-0.563115	2.85932	-3.76017	0.00348676	0.00896059	-2.67294	renD	DLP12 prophage%3B protein RenD
b2567	-0.194562	8.47886	-3.75994	0.00348811	0.00896059	-3.72658	rnc	RNase III
b1820	-0.390997	4.55532	-3.75802	0.0034994	0.00898428	-3.11626	yobD	conserved inner membrane protein YobD
b0537	-0.242035	5.90562	-3.75704	0.00350512	0.00899364	-3.43086	intD	DLP12 prophage%3B putative integrase
b1107	-0.223407	6.3252	-3.75653	0.00350814	0.00899607	-3.51085	nagZ	beta-N-acetylhexosaminidase
b3086	-0.532812	2.77409	-3.75329	0.00352726	0.00903895	-2.66309	ygjQ	DUF218 domain-containing protein YgjQ
b3826	0.229923	6.16389	3.753	0.00352902	0.00903895	-3.48944	yigL	phosphosugar phosphatase YigL
b2947	0.206124	7.436	3.75231	0.00353312	0.00904411	-3.66936	gshB	glutathione synthetase
b1828	-0.343129	4.37874	-3.75055	0.00354358	0.00906555	-3.08683	yebQ	putative transporter YebQ
b3602	-0.244328	6.63122	-3.74737	0.00356253	0.00910867	-3.57673	yibL	DUF2810 domain-containing protein YibL
b4215	-1.08487	0.962643	-3.74626	0.00356916	0.00912026	-2.17096	ytfI	protein YtfI
b4169	0.202924	7.23082	3.74395	0.00358305	0.00915037	-3.66265	amiB	N-acetylmuramoyl-L-alanine amidase B
b0969	0.315988	5.76807	3.73971	0.00360871	0.00921047	-3.4338	tusE	sulfur transfer protein TusE
b3642	-0.407688	3.79678	-3.73436	0.00364128	0.00928815	-2.96625	pyrE	orotate phosphoribosyltransferase
b2994	-0.355825	4.52133	-3.73331	0.00364776	0.00929921	-3.1517	hybC	hydrogenase 2 large subunit
b1040	-0.856898	1.39091	-3.73235	0.00365366	0.0093088	-2.3149	csgD	DNA-binding transcriptional dual regulator CsgD
b4389	0.227283	7.39698	3.72477	0.00370051	0.00942264	-3.71346	radA	DNA recombination protein
b2274	-1.38152	-0.08614	-3.72366	0.00370743	0.00943472	-1.96817	yfbO	uncharacterized protein YfbO
b3101	0.489228	3.1557	3.72195	0.00371815	0.0094557	-2.82244	yqjF	DoxX family protein
b1619	0.425802	4.77402	3.72145	0.00372124	0.0094557	-3.23535	hdhA	7-alpha-hydroxysteroid dehydrogenase
b2341	0.376563	4.55191	3.7213	0.0037222	0.0094557	-3.18209	fadJ	3-hydroxyacyl-CoA dehydrogenase FadJ
b2266	0.339732	4.55356	3.72079	0.00372541	0.00945831	-3.18369	elaB	tail anchored inner membrane protein
b3326	-0.660687	2.03249	-3.71553	0.00375854	0.00953687	-2.5231	gspE	Type II secretion system protein GspE
b2755	-0.620957	2.55237	-3.71404	0.00376794	0.00955513	-2.66988	cas1	multifunctional nuclease Cas1
b1490	-0.656579	2.35036	-3.71197	0.0037811	0.00958291	-2.61603	dosC	diguanylate cyclase DosC
b3998	0.243202	6.30394	3.71119	0.00378607	0.0095899	-3.58736	nfi	endonuclease V
b1109	0.226311	9.06534	3.71032	0.00379166	0.00959846	-3.83543	ndh	NADH:quinone oxidoreductase II
b0433	0.172166	8.81462	3.70898	0.00380019	0.00961445	-3.8295	ampG	muropeptide:H(+) symporter
b2860	-2.22069	-1.78239	-3.7061	0.00381867	0.00965559	-1.72592	insD-4	IS2 insertion element protein InsB
b3197	0.208489	6.97073	3.70478	0.00382721	0.00967155	-3.69995	kdsD	D-arabinose 5-phosphate isomerase KdsD
b1765	0.301659	5.53057	3.69909	0.00386408	0.00975906	-3.45273	ydjA	putative oxidoreductase
b3530	-0.317761	5.1948	-3.69722	0.00387625	0.00978411	-3.37691	bcsC	cellulose biosynthesis protein BcsC
b1916	-0.251665	6.0615	-3.69685	0.00387868	0.00978455	-3.56658	sdiA	DNA-binding transcriptional dual regulator SdiA
b0418	-0.211892	6.92595	-3.69506	0.00389042	0.00980846	-3.71006	pgpA	phosphatidylglycerophosphatase A
b0971	-0.351089	4.35993	-3.69236	0.00390818	0.00984357	-3.18348	serT	tRNA-Ser
b1549	-1.11662	0.23625	-3.69225	0.00390888	0.00984357	-2.09572	ydfO	Qin prophage%3B protein YdfO
b1931	-0.775449	1.52505	-3.68661	0.00394626	0.00993196	-2.43146	yedK	putative SOS response-associated peptidase YedK
b2403	-0.528637	7.80219	-3.68517	0.00395584	0.00995031	-3.81465	valY	tRNA-Val
b3780	-0.170644	9.5869	-3.68422	0.00396219	0.00996051	-3.89566	rhlB	ATP-dependent RNA helicase RhlB
b1837	-0.620295	2.18241	-3.68104	0.00398348	0.0100065	-2.62569	yebW	protein YebW
b2844	-0.2452	6.12246	-3.68057	0.00398667	0.0100065	-3.60655	yqeF	putative acyltransferase
b0505	0.86846	1.10003	3.68046	0.00398741	0.0100065	-2.33156	allA	ureidoglycolate lyase
b3104	-1.27875	-0.129744	-3.67245	0.00404167	0.0101368	-2.05008	yhaI	putative inner membrane protein
b3810	0.274045	6.29798	3.67186	0.0040457	0.0101411	-3.65493	yigA	conserved protein YigA
b0405	-0.232908	7.55875	-3.67095	0.00405191	0.0101508	-3.82199	queA	tRNA preQ1(34) S-adenosylmethionine ribosyltransferase-isomerase
b4414	-0.195991	8.73289	-3.67026	0.00405669	0.0101569	-3.89388	tff	putative small RNA T44
b2692	-0.224577	7.99537	-3.66874	0.00406706	0.010177	-3.85905	argZ	tRNA-Arg
b0420	0.203149	7.419	3.66838	0.00406957	0.0101774	-3.81434	dxs	1-deoxy-D-xylulose-5-phosphate synthase
b1543	-0.936865	1.14281	-3.66511	0.00409207	0.0102278	-2.36315	ydfJ	putative transporter YdfJ
b0202	-0.663221	2.63157	-3.66268	0.00410892	0.010264	-2.77958	ileV	tRNA-Ile
b4063	-0.552404	2.6773	-3.66012	0.00412676	0.0103012	-2.79881	soxR	DNA-binding transcriptional dual regulator SoxR
b2240	-0.441424	3.49214	-3.65986	0.00412853	0.0103012	-3.01604	glpT	sn-glycerol 3-phosphate:phosphate antiporter
b1550	-0.448186	4.99211	-3.6548	0.00416403	0.0103838	-3.40079	gnsB	Qin prophage%3B protein GnsB
b1645	-0.378051	5.00512	-3.65306	0.00417625	0.0104054	-3.40863	ydhK	putative transporter YdhK
b4203	-0.238857	12.3272	-3.65289	0.00417748	0.0104054	-4.01533	rplI	50S ribosomal subunit protein L9
b3915	0.237621	6.5341	3.65013	0.00419699	0.010448	-3.73274	fieF	Zn(2(+))/Fe(2(+))/Cd(2(+)) exporter
b3488	-0.755767	1.52703	-3.64909	0.00420439	0.0104604	-2.49693	yhiJ	DUF4049 domain-containing protein YhiJ
b3638	0.218685	6.36004	3.64755	0.00421535	0.0104817	-3.70861	yicR	RadC-like JAB domain-containing protein YicR
b3027	-1.90868	-1.78842	-3.64558	0.00422945	0.0105107	-1.82785	ygiZ	conserved inner membrane protein YgiZ
b0662	0.373062	4.00542	3.64493	0.00423405	0.0105161	-3.1787	ubiF	2-octaprenyl-3-methyl-6-methoxy-1%2C4-benzoquinol hydroxylase
b0111	0.323417	4.77761	3.64366	0.00424316	0.0105327	-3.37277	ampE	protein AmpE
b2830	0.215018	7.24573	3.64299	0.00424797	0.0105387	-3.84077	rppH	RNA pyrophosphohydrolase
b2030	-0.456491	3.82581	-3.64233	0.00425277	0.0105445	-3.13264	insH-7	IS5 transposase and trans-activator
b1303	0.365059	4.0124	3.63905	0.00427641	0.0105953	-3.19079	pspF	DNA-binding transcriptional dual regulator PspF
b0666	-0.234136	9.21882	-3.63881	0.00427812	0.0105953	-3.96499	metU	tRNA-Met
b2858	-1.14527	0.16457	-3.63817	0.00428277	0.0106008	-2.17109	ygeN	putative type III secretion system protein
b2610	0.174462	9.07994	3.63721	0.00428975	0.010612	-3.96384	ffh	signal recognition particle protein component
b4046	-0.262808	5.64015	-3.63516	0.00430462	0.0106427	-3.58761	zur	DNA-binding transcriptional repressor Zur
b2105	-0.497658	3.0087	-3.63283	0.00432161	0.0106787	-2.93545	rcnR	DNA-binding transcriptional repressor RcnR
b4539	0.367813	4.36725	3.6312	0.00433358	0.0107021	-3.29418	yoeB	ribosome-dependent mRNA interferase toxin YoeB
b3309	-0.160378	12.0353	-3.62988	0.00434325	0.0107199	-4.04933	rplX	50S ribosomal subunit protein L24
b1778	-0.295967	6.1183	-3.62662	0.00436731	0.0107732	-3.69948	msrB	methionine sulfoxide reductase B
b1579	-1.13503	0.754289	-3.62124	0.00440731	0.0108657	-2.33578	intQ	Qin prophage%3B putative defective integrase
b0184	-0.171404	9.60127	-3.61972	0.00441862	0.0108874	-4.00897	dnaE	DNA polymerase III subunit alpha
b0022	-0.406681	3.59382	-3.6191	0.00442326	0.0108927	-3.11443	insA-1	IS1 protein InsA
b4689	-1.06001	0.310412	-3.61868	0.00442643	0.0108943	-2.23889	rzoQ	Qin prophage%3B putative lipoprotein RzoQ
b2299	-0.204337	6.67836	-3.6182	0.00443006	0.010897	-3.80986	yfcD	putative Nudix hydrolase
b2959	0.220285	7.17077	3.61487	0.00445511	0.010951	-3.8816	yggL	protein YggL
b3386	-0.197153	7.01263	-3.61461	0.00445705	0.010951	-3.86223	rpe	ribulose-phosphate 3-epimerase
b2329	0.208764	7.68846	3.61204	0.00447651	0.0109926	-3.93694	aroC	chorismate synthase
b1382	-0.579317	2.49131	-3.61054	0.00448793	0.0110145	-2.83332	ynbE	lipoprotein YnbE
b2259	-0.432785	4.2158	-3.60876	0.00450148	0.0110415	-3.2919	pmrD	signal transduction protein PmrD
b1901	0.893504	1.36181	3.60732	0.00451246	0.0110621	-2.52676	araF	arabinose ABC transporter periplasmic binding protein
b3610	-0.232624	7.25269	-3.60589	0.0045234	0.0110827	-3.90557	grxC	glutaredoxin 3
b3457	-0.47962	3.00775	-3.60346	0.00454208	0.0111222	-2.98705	livH	branched chain amino acid/phenylalanine ABC transporter membrane subunit LivH
b3118	-0.821292	1.28599	-3.6029	0.00454641	0.0111265	-2.5114	tdcA	DNA-binding transcriptional activator TdcA
b0694	0.42361	3.54927	3.59859	0.00457975	0.0112018	-3.14099	kdpE	DNA-binding transcriptional activator KdpE
b0984	-0.700862	1.80957	-3.59709	0.00459146	0.011217	-2.66563	gfcD	putative lipoprotein GfcD
b1309	-0.880645	2.00445	-3.59694	0.00459262	0.011217	-2.71195	ycjM	glucosylglycerate phosphorylase
b0774	-0.271911	5.56289	-3.59676	0.00459401	0.011217	-3.63781	bioA	adenosylmethionine-8-amino-7-oxononanoate aminotransferase
b3287	0.22475	7.95668	3.59639	0.00459684	0.011217	-3.98372	def	peptide deformylase
b3567	-0.834174	1.21279	-3.59604	0.00459965	0.011217	-2.50229	xylG	xylose ABC transporter ATP binding subunit
b3885	0.29241	5.24323	3.59581	0.00460144	0.011217	-3.56772	yihX	alpha-D-glucose-1-phosphate phosphatase
b3506	-0.591415	2.40748	-3.58922	0.00465313	0.0113316	-2.84823	slp	starvation lipoprotein
b0831	0.454285	3.20112	3.58915	0.00465369	0.0113316	-3.06647	gsiC	glutathione ABC transporter membrane subunit GsiC
b3125	0.655222	2.05306	3.58524	0.00468468	0.0113991	-2.76048	garR	tartronate semialdehyde reductase
b1138	-0.694624	2.42322	-3.58499	0.00468664	0.0113991	-2.85465	ymfE	e14 prophage%3B uncharacterized protein YmfE
b3590	0.209046	6.97292	3.58342	0.00469914	0.0114231	-3.91271	selB	selenocysteyl-tRNA-specific translation elongation factor
b4402	-0.971616	0.901828	-3.58301	0.00470248	0.0114248	-2.44096	yjjY	protein YjjY
b4599	0.506627	3.03755	3.5819	0.00471133	0.0114399	-3.03565	mgtS	small protein MgtS
b3296	-0.157631	12.7249	-3.58076	0.00472048	0.0114557	-4.15014	rpsD	30S ribosomal subunit protein S4
b1571	-0.862214	1.05083	-3.57715	0.0047495	0.0115197	-2.49242	ydfA	Qin prophage%3B DUF1391 domain-containing protein YdfA
b1513	1.11091	0.0995514	3.57462	0.00476991	0.0115628	-2.27145	lsrA	Autoinducer-2 ABC transporter ATP binding subunit
b3291	-0.276311	5.51964	-3.56596	0.00484063	0.0117277	-3.68196	mscL	large conductance mechanosensitive channel
b1628	-0.210514	6.72853	-3.5576	0.00490988	0.0118888	-3.92348	rsxB	SoxR [2Fe-2S] reducing system protein RsxB
b3094	0.19704	7.29981	3.55691	0.00491561	0.0118935	-3.99766	exuR	DNA-binding transcriptional repressor ExuR
b0164	-0.344831	4.59602	-3.55671	0.00491731	0.0118935	-3.47918	yaeI	phosphodiesterase YaeI
b0389	-0.31133	5.41997	-3.5544	0.00493666	0.0119337	-3.67899	yaiA	protein YaiA
b3828	0.566213	2.88057	3.55356	0.00494375	0.0119442	-3.04216	metR	DNA-binding transcriptional dual regulator MetR
b0408	0.166633	10.0017	3.55285	0.00494965	0.0119518	-4.13653	secD	Sec translocon accessory complex subunit SecD
b1904	-0.9861	1.46018	-3.55156	0.00496053	0.0119714	-2.64184	yecR	lipoprotein YecR
b1493	-1.25241	-0.0121583	-3.54701	0.00499914	0.0120579	-2.28779	gadB	glutamate decarboxylase B
b1659	0.404328	3.68768	3.54555	0.00501156	0.0120812	-3.27003	ydhB	putative LysR family DNA-binding transcriptional regulator YdhB
b1445	-0.388995	3.88439	-3.54213	0.00504078	0.0121448	-3.32467	ortT	orphan toxin OrtT
b0329	-0.640842	2.11411	-3.54097	0.00505072	0.0121601	-2.84907	yahO	DUF1471 domain-containing protein YahO
b2150	-0.297899	6.03704	-3.54074	0.00505269	0.0121601	-3.8345	mglB	D-galactose/methyl-galactoside ABC transporter periplasmic binding protein
b0063	0.864409	0.918021	3.53556	0.00509743	0.0122609	-2.53529	araB	ribulokinase
b1177	-0.494338	4.00919	-3.52782	0.00516503	0.0124056	-3.37915	ycgJ	PF05666 family protein YcgJ
b2627	-0.256551	5.52666	-3.5278	0.00516522	0.0124056	-3.75087	abpB	CP4-57 prophage%3B putative helicase YfjK
b3249	0.180667	7.38374	3.5277	0.00516616	0.0124056	-4.05763	mreD	cell shape determining protein MreD
b1241	0.181012	10.4688	3.52556	0.00518499	0.012444	-4.19596	adhE	aldehyde-alcohol dehydrogenase
b3332	-0.961938	0.691451	-3.52489	0.00519093	0.0124513	-2.49128	gspK	Type II secretion system protein GspK
b3689	0.266498	5.50437	3.5211	0.00522449	0.0125249	-3.75889	yidR	DUF3748 domain-containing galacturonate catabolism protein YidR
b0915	-0.228532	7.11205	-3.52016	0.00523287	0.0125381	-4.04003	lpxK	tetraacyldisaccharide 4'-kinase
b0863	0.213417	7.0307	3.51867	0.00524618	0.0125631	-4.03367	artI	putative ABC transporter periplasmic binding protein ArtI
b3470	-0.268796	5.44228	-3.51559	0.00527382	0.0126223	-3.75288	tusA	sulfur transfer protein TusA
b4425	-0.312036	6.52323	-3.51122	0.00531318	0.0127095	-3.9725	rttR	small RNA RttR
b0814	0.170518	11.2886	3.51062	0.00531865	0.0127141	-4.24178	ompX	outer membrane protein X
b2519	-0.286095	5.21041	-3.51037	0.00532097	0.0127141	-3.70834	pbpC	peptidoglycan glycosyltransferase PbpC
b1175	0.204052	8.1388	3.50973	0.00532678	0.012721	-4.1474	minD	Z-ring positioning protein MinD
b4547	-0.269293	5.14382	-3.50808	0.00534176	0.0127498	-3.69689	ypfN	UPF0370 protein YpfN
b2975	-0.640609	2.18258	-3.49409	0.00547074	0.0130505	-2.95108	glcA	glycolate/lactate:H(+) symporter GlcA
b1029	-1.23619	0.42767	-3.49375	0.00547386	0.0130507	-2.47449	ycdU	uncharacterized protein YcdU
b0905	-0.17125	8.8789	-3.48979	0.00551098	0.013132	-4.21597	ycaO	ribosomal protein S12 methylthiotransferase accessory factor YcaO
b3224	0.539706	3.10725	3.48894	0.00551897	0.0131439	-3.21522	nanT	N-acetylneuraminate:H(+) symporter
[truncated: 2,520 more rows]

## Sheet: WS03
WS03: Differential expression profile of lipopolysaccharide biosynthesis regulating genes upon exposure of E. coli K12 to MIC75 concentration of L-Ag NPs
[truncated: 18 more rows]

[truncated: 9 more sheets: WS04, WS05, WS06, WS07, WS08, WS09, WS10, WS11, WS12]
